# Supplementary material for: Shared enhancer gene regulatory networks between wound and oncogenic programs
Source: eLife. 2023 May 3;12:e81173. doi: 10.7554/eLife.81173 (PMC10238094; doi:10.7554/eLife.81173)
Supplement: Supplementary file 2. [file elife-81173-supp2.csv]

	Region_signature_name	Gene_signature_name	Region	Gene	R2G_rho	TF2G_rho
0	Adf1_+_+_(8r)	Adf1_+_+_(7g)	chr3R:9961061-9961561	Glut4EF	0.041894819099532944	0.0399814381411053
1	Adf1_+_+_(8r)	Adf1_+_+_(7g)	chrX:11778165-11778665	CG1578	0.04339119286722978	0.163594804588699
2	Adf1_+_+_(8r)	Adf1_+_+_(7g)	chrX:11778752-11779252	CG1578	0.058042508813238254	0.163594804588699
3	Adf1_+_+_(8r)	Adf1_+_+_(7g)	chr3L:17609561-17610061	Crtc	0.07547788108282165	0.2077846743903885
4	Adf1_+_+_(8r)	Adf1_+_+_(7g)	chr3L:17611170-17611670	Crtc	0.04665847156694773	0.2077846743903885
5	Adf1_+_+_(8r)	Adf1_+_+_(7g)	chr2R:18942087-18942587	CG15107	0.040649241733278024	0.115724621238702
6	Adf1_+_+_(8r)	Adf1_+_+_(7g)	chr3L:662034-662534	Gale	0.05761748920495836	0.0733839299311998
7	Adf1_+_+_(8r)	Adf1_+_+_(7g)	chr2R:18942087-18942587	prod	0.042849544906647614	0.154020263734629
8	Adf1_+_+_(8r)	Adf1_+_+_(7g)	chr3L:17964958-17965458	Eip75B	0.28567522568979753	0.2088776031504785
0	Aef1_+_+_(27r)	Aef1_+_+_(27g)	chr3R:12647855-12648355	Dtg	0.24393171568713512	0.0755049861894817
1	Aef1_+_+_(27r)	Aef1_+_+_(27g)	chr3L:662034-662534	CG3386	0.03006607883468701	0.0568377182696741
2	Aef1_+_+_(27r)	Aef1_+_+_(27g)	chr3R:19251062-19251562	vib	0.05154899480179725	0.1172266743315427
3	Aef1_+_+_(27r)	Aef1_+_+_(27g)	chr3R:19250530-19251030	vib	0.051745047572371694	0.1172266743315427
4	Aef1_+_+_(27r)	Aef1_+_+_(27g)	chr2R:24362367-24362867	bs	0.23158355227631766	0.0805540371062642
5	Aef1_+_+_(27r)	Aef1_+_+_(27g)	chr3R:18989051-18989551	GatA	0.032317092703153215	0.0477062750926689
6	Aef1_+_+_(27r)	Aef1_+_+_(27g)	chr3R:18989051-18989551	NP15.6	0.08624836864423013	0.1316818424391748
7	Aef1_+_+_(27r)	Aef1_+_+_(27g)	chr2L:2425635-2426135	PIG-Wa	0.04552708107002397	0.0456119476435036
8	Aef1_+_+_(27r)	Aef1_+_+_(27g)	chr2L:18652841-18653341	CG10341	0.04431943592728329	0.065776345165653
9	Aef1_+_+_(27r)	Aef1_+_+_(27g)	chr2R:22154448-22154948	a	0.10031093774917053	0.0613529867627129
10	Aef1_+_+_(27r)	Aef1_+_+_(27g)	chr2R:22157123-22157623	a	0.09867186770310946	0.0613529867627129
11	Aef1_+_+_(27r)	Aef1_+_+_(27g)	chr3L:3876875-3877375	Awh	0.10774415474403241	0.0447538771417955
12	Aef1_+_+_(27r)	Aef1_+_+_(27g)	chr2R:9674943-9675443	Mmp2	0.22181020818327105	0.0610182887199358
13	Aef1_+_+_(27r)	Aef1_+_+_(27g)	chr2R:11545951-11546451	inv	0.2459589193270594	0.0846318280553121
14	Aef1_+_+_(27r)	Aef1_+_+_(27g)	chr3R:29519252-29519752	Trc8	0.05177980802710845	0.096279275591485
15	Aef1_+_+_(27r)	Aef1_+_+_(27g)	chrX:16761736-16762236	if	0.15447648642377504	0.0716954929603327
16	Aef1_+_+_(27r)	Aef1_+_+_(27g)	chr2R:21734582-21735082	Tango11	0.035999488487134364	0.0903455466573895
17	Aef1_+_+_(27r)	Aef1_+_+_(27g)	chr2R:15043628-15044128	hbs	0.20111090301867757	0.0800465828853754
18	Aef1_+_+_(27r)	Aef1_+_+_(27g)	chr2R:12412017-12412517	Cpr49Ah	0.20277359208666057	0.0315335598441745
19	Aef1_+_+_(27r)	Aef1_+_+_(27g)	chr2R:8057509-8058009	Cul4	0.07214802110457473	0.0920034748195146
20	Aef1_+_+_(27r)	Aef1_+_+_(27g)	chr3L:12428575-12429075	CG10616	0.053368023270210604	0.0952102322041941
21	Aef1_+_+_(27r)	Aef1_+_+_(27g)	chr2R:12412017-12412517	Cpr49Ac	0.046958451494124386	0.0325872309659384
22	Aef1_+_+_(27r)	Aef1_+_+_(27g)	chr3L:1827838-1828338	GV1	0.3165665658623727	0.0857897809833199
23	Aef1_+_+_(27r)	Aef1_+_+_(27g)	chr2R:18422733-18423233	Ttd14	0.05627413457935348	0.0996758870761646
24	Aef1_+_+_(27r)	Aef1_+_+_(27g)	chr3R:19333575-19334075	Dl	0.33601759630759587	0.1582830365798432
25	Aef1_+_+_(27r)	Aef1_+_+_(27g)	chr3L:7518528-7519028	ltl	0.24785116744048596	0.0677588144852057
26	Aef1_+_+_(27r)	Aef1_+_+_(27g)	chr2R:7143237-7143737	Spn43Aa	0.5190020101188875	0.0727585123696106
27	Aef1_+_+_(27r)	Aef1_+_+_(27g)	chr3L:6498924-6499424	sfl	0.05777307215804689	0.1037471227144671
28	Aef1_+_+_(27r)	Aef1_+_+_(27g)	chr3L:5625168-5625668	TM9SF3	0.08851853847602292	0.0994834803335765
0	Antp_+_+_(105r)	Antp_+_+_(73g)	chr3L:20706842-20707342	kni	0.08694096453080864	0.1661720690427462
1	Antp_+_+_(105r)	Antp_+_+_(73g)	chr3L:12638265-12638765	caup	0.41427350798871604	0.2632239701873861
2	Antp_+_+_(105r)	Antp_+_+_(73g)	chr3L:12619295-12619795	caup	0.4352007997183536	0.2632239701873861
3	Antp_+_+_(105r)	Antp_+_+_(73g)	chr3L:12643143-12643643	caup	0.4158648638195733	0.2632239701873861
4	Antp_+_+_(105r)	Antp_+_+_(73g)	chr3R:18075776-18076276	sr	0.16128263373120708	0.0893052410477857
5	Antp_+_+_(105r)	Antp_+_+_(73g)	chr3R:18099585-18100085	sr	0.12247569054387493	0.0893052410477857
6	Antp_+_+_(105r)	Antp_+_+_(73g)	chr3R:18067289-18067789	sr	0.1712364703399048	0.0893052410477857
7	Antp_+_+_(105r)	Antp_+_+_(73g)	chr2L:8346215-8346715	CG7778	0.05933866447386433	0.0917348656355429
8	Antp_+_+_(105r)	Antp_+_+_(73g)	chr2L:8297803-8298303	CG7778	0.05249383273492446	0.0917348656355429
9	Antp_+_+_(105r)	Antp_+_+_(73g)	chr2L:11312177-11312677	salr	0.2943723587163286	0.0866914007157954
10	Antp_+_+_(105r)	Antp_+_+_(73g)	chr2L:6459873-6460373	CG9527	0.03405267593995228	0.0765873476886733
11	Antp_+_+_(105r)	Antp_+_+_(73g)	chr2R:23244172-23244672	side-V	0.20804666673958835	0.396586618405043
12	Antp_+_+_(105r)	Antp_+_+_(73g)	chr2R:23243482-23243982	side-V	0.26014144286267915	0.396586618405043
13	Antp_+_+_(105r)	Antp_+_+_(73g)	chr2R:23208434-23208934	side-V	0.10955831651304514	0.396586618405043
14	Antp_+_+_(105r)	Antp_+_+_(73g)	chr3L:19010678-19011178	nkd	0.42779956370482025	0.0592788740044474
15	Antp_+_+_(105r)	Antp_+_+_(73g)	chr3R:16374149-16374649	ss	0.33197275511515084	0.0585052952389011
16	Antp_+_+_(105r)	Antp_+_+_(73g)	chr3L:12625002-12625502	ara	0.3397643045057584	0.2212255126301904
17	Antp_+_+_(105r)	Antp_+_+_(73g)	chr3L:12619295-12619795	ara	0.3504669139229616	0.2212255126301904
18	Antp_+_+_(105r)	Antp_+_+_(73g)	chr3L:12638265-12638765	ara	0.33642711018950916	0.2212255126301904
19	Antp_+_+_(105r)	Antp_+_+_(73g)	chr3L:12421924-12422424	toe	0.34074174305214827	0.1536314452077139
20	Antp_+_+_(105r)	Antp_+_+_(73g)	chr3L:12463194-12463694	toe	0.3073187985263924	0.1536314452077139
21	Antp_+_+_(105r)	Antp_+_+_(73g)	chr2L:21011524-21012024	CG42238	0.200280400662331	0.1829911255207696
22	Antp_+_+_(105r)	Antp_+_+_(73g)	chr2L:21059261-21059761	CG42238	0.22094993386480216	0.1829911255207696
23	Antp_+_+_(105r)	Antp_+_+_(73g)	chr2L:20975354-20975854	CG42238	0.16634651971655692	0.1829911255207696
24	Antp_+_+_(105r)	Antp_+_+_(73g)	chr2L:21004087-21004587	CG42238	0.19770291463561848	0.1829911255207696
25	Antp_+_+_(105r)	Antp_+_+_(73g)	chr2L:8000281-8000781	Sirup	0.1408522278604835	0.2227684335228164
26	Antp_+_+_(105r)	Antp_+_+_(73g)	chr3L:22398689-22399189	Ten-m	0.16102124105535004	0.2262023905906097
27	Antp_+_+_(105r)	Antp_+_+_(73g)	chr3L:22439021-22439521	Ten-m	0.14271390336974055	0.2262023905906097
28	Antp_+_+_(105r)	Antp_+_+_(73g)	chr3L:22352215-22352715	Ten-m	0.1931540146575343	0.2262023905906097
29	Antp_+_+_(105r)	Antp_+_+_(73g)	chrX:16198702-16199202	disco-r	0.13203333964949548	0.0758419967910064
30	Antp_+_+_(105r)	Antp_+_+_(73g)	chr2L:18888935-18889435	tup	0.2800707537408017	0.0313399488027183
31	Antp_+_+_(105r)	Antp_+_+_(73g)	chr2L:18874343-18874843	tup	0.33564909570645923	0.0313399488027183
32	Antp_+_+_(105r)	Antp_+_+_(73g)	chr2L:18907058-18907558	tup	0.3365281965328547	0.0313399488027183
33	Antp_+_+_(105r)	Antp_+_+_(73g)	chr3R:10648356-10648856	Skeletor	0.09271341274074646	0.1482882411368291
34	Antp_+_+_(105r)	Antp_+_+_(73g)	chr3R:10674318-10674818	Skeletor	0.11755531429494749	0.1482882411368291
35	Antp_+_+_(105r)	Antp_+_+_(73g)	chr3R:7442090-7442590	CG14598	0.2137605628978336	0.0600561855316722
36	Antp_+_+_(105r)	Antp_+_+_(73g)	chr3R:7438754-7439254	CG14598	0.20777774648329636	0.0600561855316722
37	Antp_+_+_(105r)	Antp_+_+_(73g)	chr3L:12442711-12443211	eyg	0.31450195520055657	0.1778209226177956
38	Antp_+_+_(105r)	Antp_+_+_(73g)	chr3L:12463194-12463694	eyg	0.31229563096001395	0.1778209226177956
39	Antp_+_+_(105r)	Antp_+_+_(73g)	chr3L:12421924-12422424	eyg	0.34400879691568825	0.1778209226177956
40	Antp_+_+_(105r)	Antp_+_+_(73g)	chr2R:18200714-18201214	fj	0.16668114496372274	0.1375914739813746
41	Antp_+_+_(105r)	Antp_+_+_(73g)	chr2R:18200168-18200668	fj	0.15309183010365604	0.1375914739813746
42	Antp_+_+_(105r)	Antp_+_+_(73g)	chr2R:18240747-18241247	fj	0.32740115224353816	0.1375914739813746
43	Antp_+_+_(105r)	Antp_+_+_(73g)	chr3L:4493502-4494002	CG32241	0.04842166981665798	0.1731556747698108
44	Antp_+_+_(105r)	Antp_+_+_(73g)	chr3L:4507243-4507743	CG32241	0.07687842457960353	0.1731556747698108
45	Antp_+_+_(105r)	Antp_+_+_(73g)	chr3R:7995808-7996308	CG2747	0.11469297025735037	0.1293407867815092
46	Antp_+_+_(105r)	Antp_+_+_(73g)	chr3L:6391760-6392260	CG13300	0.19042454474977685	0.2130003660419969
47	Antp_+_+_(105r)	Antp_+_+_(73g)	chr3L:6315820-6316320	CG13300	0.11558254698156863	0.2130003660419969
48	Antp_+_+_(105r)	Antp_+_+_(73g)	chr3L:6794789-6795289	vvl	0.4454145414144485	0.0302446511552292
49	Antp_+_+_(105r)	Antp_+_+_(73g)	chrX:18557582-18558082	Bx	0.3311557314276139	0.0336887678948065
50	Antp_+_+_(105r)	Antp_+_+_(73g)	chrX:18541190-18541690	Bx	0.4032909265141256	0.0336887678948065
51	Antp_+_+_(105r)	Antp_+_+_(73g)	chrX:18545674-18546174	Bx	0.4295954108171198	0.0336887678948065
52	Antp_+_+_(105r)	Antp_+_+_(73g)	chrX:18544053-18544553	Bx	0.37294888768220896	0.0336887678948065
53	Antp_+_+_(105r)	Antp_+_+_(73g)	chr3L:17501819-17502319	Oatp74D	0.08336209483529751	0.2718120154739496
54	Antp_+_+_(105r)	Antp_+_+_(73g)	chr3R:27176036-27176536	Ser	0.42947945450032615	0.0524755153205146
55	Antp_+_+_(105r)	Antp_+_+_(73g)	chr3R:27170082-27170582	Ser	0.4221967089315034	0.0524755153205146
56	Antp_+_+_(105r)	Antp_+_+_(73g)	chr3R:27207519-27208019	Ser	0.43320105923934116	0.0524755153205146
57	Antp_+_+_(105r)	Antp_+_+_(73g)	chr2L:6459873-6460373	Rchy1	0.0800436904803174	0.0993492139048588
58	Antp_+_+_(105r)	Antp_+_+_(73g)	chr3L:6472939-6473439	CG42747	0.09765167207610226	0.2220925604517829
59	Antp_+_+_(105r)	Antp_+_+_(73g)	chr3L:6391760-6392260	CG42747	0.146094212411348	0.2220925604517829
60	Antp_+_+_(105r)	Antp_+_+_(73g)	chr3L:6471458-6471958	CG42747	0.11425821275068475	0.2220925604517829
61	Antp_+_+_(105r)	Antp_+_+_(73g)	chr3R:26013039-26013539	E(spl)m8-HLH	0.115318870115782	0.0709824405824816
62	Antp_+_+_(105r)	Antp_+_+_(73g)	chr2R:24840962-24841462	Reg-5	0.08699771405899358	0.1579586742028644
63	Antp_+_+_(105r)	Antp_+_+_(73g)	chr2R:24839125-24839625	Reg-5	0.08403765342011439	0.1579586742028644
64	Antp_+_+_(105r)	Antp_+_+_(73g)	chr2L:19229996-19230496	drl	0.3351770504933664	0.2108593597076986
65	Antp_+_+_(105r)	Antp_+_+_(73g)	chr3L:1936508-1937008	Tmhs	0.09867671278111524	0.1326171210371601
66	Antp_+_+_(105r)	Antp_+_+_(73g)	chr3L:1940096-1940596	Tmhs	0.11330476238740168	0.1326171210371601
67	Antp_+_+_(105r)	Antp_+_+_(73g)	chrX:3437234-3437734	CG12206	0.12137821353789371	0.1445402187703402
68	Antp_+_+_(105r)	Antp_+_+_(73g)	chr2R:11747937-11748437	ths	0.40694557324602154	0.1520330075756017
69	Antp_+_+_(105r)	Antp_+_+_(73g)	chr2R:11822128-11822628	ths	0.4440584625284209	0.1520330075756017
70	Antp_+_+_(105r)	Antp_+_+_(73g)	chr2R:11814990-11815490	ths	0.4350408507466618	0.1520330075756017
71	Antp_+_+_(105r)	Antp_+_+_(73g)	chrX:13542102-13542602	Cpr12A	0.12556161348833525	0.1237976361249953
72	Antp_+_+_(105r)	Antp_+_+_(73g)	chr3L:8884878-8885378	CG32026	0.03941993987887755	0.0468432861621121
73	Antp_+_+_(105r)	Antp_+_+_(73g)	chr3L:11717362-11717862	CG14132	0.10395482714444394	0.0990536064622769
74	Antp_+_+_(105r)	Antp_+_+_(73g)	chr2L:4566013-4566513	dpy	0.3413742504903186	0.2495090792859627
75	Antp_+_+_(105r)	Antp_+_+_(73g)	chr3R:13912993-13913493	E5	0.058190580442044906	0.1291959370021357
76	Antp_+_+_(105r)	Antp_+_+_(73g)	chr3R:14470141-14470641	natalisin	0.040447626840369615	0.1198279654322493
77	Antp_+_+_(105r)	Antp_+_+_(73g)	chr2L:1432501-1433001	robo2	0.15847446850956695	0.2112935744379896
78	Antp_+_+_(105r)	Antp_+_+_(73g)	chr2L:1431214-1431714	robo2	0.16678347340874683	0.2112935744379896
79	Antp_+_+_(105r)	Antp_+_+_(73g)	chr2L:11959467-11959967	CG18787	0.03257084234278022	0.0828580214135847
80	Antp_+_+_(105r)	Antp_+_+_(73g)	chr3L:1267772-1268272	tfc	0.13885489756925715	0.1565889566796112
81	Antp_+_+_(105r)	Antp_+_+_(73g)	chr3R:13934226-13934726	ems	0.06068565735766842	0.1200156667904857
82	Antp_+_+_(105r)	Antp_+_+_(73g)	chrX:4428742-4429242	bi	0.39761267465674216	0.093625447656167
83	Antp_+_+_(105r)	Antp_+_+_(73g)	chrX:4474134-4474634	bi	0.5897374939681835	0.093625447656167
84	Antp_+_+_(105r)	Antp_+_+_(73g)	chr2L:12078228-12078728	CG6785	0.03696791962993057	0.0619745116173088
85	Antp_+_+_(105r)	Antp_+_+_(73g)	chr2L:21868490-21868990	tsh	0.355099380415486	0.3402532025218878
86	Antp_+_+_(105r)	Antp_+_+_(73g)	chr2L:21798226-21798726	tsh	0.31193983167709083	0.3402532025218878
87	Antp_+_+_(105r)	Antp_+_+_(73g)	chr3L:5611867-5612367	Blimp-1	0.4153238591491599	0.0855458256974612
88	Antp_+_+_(105r)	Antp_+_+_(73g)	chr2R:16706651-16707151	Pgant9	0.17155373798441237	0.1817650916044813
89	Antp_+_+_(105r)	Antp_+_+_(73g)	chr2R:16715620-16716120	Pgant9	0.17070042569884386	0.1817650916044813
90	Antp_+_+_(105r)	Antp_+_+_(73g)	chrX:15070457-15070957	Lsd-2	0.31991701794339455	0.0781682201977197
91	Antp_+_+_(105r)	Antp_+_+_(73g)	chr2L:6273679-6274179	Ddr	0.10878974677922555	0.1403696563874168
92	Antp_+_+_(105r)	Antp_+_+_(73g)	chr3L:7732044-7732544	CG32369	0.04288275811442881	0.1691166630936664
93	Antp_+_+_(105r)	Antp_+_+_(73g)	chr2L:2806204-2806704	CG2975	0.07018711690248296	0.0763641007802091
94	Antp_+_+_(105r)	Antp_+_+_(73g)	chr3R:23461803-23462303	CG4374	0.28876074137167185	0.1654515601507525
95	Antp_+_+_(105r)	Antp_+_+_(73g)	chr3R:23454213-23454713	CG4374	0.2892243736864025	0.1654515601507525
96	Antp_+_+_(105r)	Antp_+_+_(73g)	chr3R:7995808-7996308	ImpE3	0.3252543536404318	0.1457279584910519
97	Antp_+_+_(105r)	Antp_+_+_(73g)	chr2R:7893712-7894212	CG14764	0.04101296809805768	0.0778892799030824
98	Antp_+_+_(105r)	Antp_+_+_(73g)	chrX:783510-784010	CG5273	0.05732790730311365	0.139934251257792
99	Antp_+_+_(105r)	Antp_+_+_(73g)	chr3R:5092934-5093434	corto	0.18259174307164378	0.1955059557108406
100	Antp_+_+_(105r)	Antp_+_+_(73g)	chr3L:15245463-15245963	Tollo	0.19654928156657844	0.2584395959037293
101	Antp_+_+_(105r)	Antp_+_+_(73g)	chr2L:14607405-14607905	osp	0.15809073426003717	0.1903412865705951
102	Antp_+_+_(105r)	Antp_+_+_(73g)	chr3L:16889151-16889651	CG13023	0.04202698797220448	0.107293054931508
103	Antp_+_+_(105r)	Antp_+_+_(73g)	chr2R:7084218-7084718	esn	0.30663588289939636	0.0568099094843593
104	Antp_+_+_(105r)	Antp_+_+_(73g)	chrX:18541190-18541690	CG15043	0.03465854951009168	0.0535353789396828
105	Antp_+_+_(105r)	Antp_+_+_(73g)	chr2R:15881808-15882308	Diap2	0.06257366718544999	0.1414776219281688
106	Antp_+_+_(105r)	Antp_+_+_(73g)	chr3L:22182676-22183176	olf413	0.13270589788826814	0.218318864441165
107	Antp_+_+_(105r)	Antp_+_+_(73g)	chrX:17330737-17331237	B-H2	0.1378039170830872	0.2465747678105447
108	Antp_+_+_(105r)	Antp_+_+_(73g)	chr2L:2806204-2806704	colt	0.031659550471439354	0.1643635988882311
109	Antp_+_+_(105r)	Antp_+_+_(73g)	chr3R:14297411-14297911	red	0.09278522047126729	0.1664668150757842
110	Antp_+_+_(105r)	Antp_+_+_(73g)	chrX:16928508-16929008	CG4928	0.270555290390069	0.154053115076604
111	Antp_+_+_(105r)	Antp_+_+_(73g)	chr2R:14516830-14517330	Cpr51A	0.2960126642947702	0.1329141721092939
112	Antp_+_+_(105r)	Antp_+_+_(73g)	chr3R:18471666-18472166	fru	0.381546703796171	0.2818752660995908
113	Antp_+_+_(105r)	Antp_+_+_(73g)	chr3L:7255955-7256455	CG14830	0.05992891293596442	0.2008865514690291
0	Atf3_+_+_(177r)	Atf3_+_+_(147g)	chr2L:1193455-1193955	CG5397	0.04135159972362226	0.0553851261248626
1	Atf3_+_+_(177r)	Atf3_+_+_(147g)	chr2L:1194672-1195172	CG5397	0.047851858874347716	0.0553851261248626
2	Atf3_+_+_(177r)	Atf3_+_+_(147g)	chr2R:14576877-14577377	LamC	0.2677084250705914	0.3298436758000118
3	Atf3_+_+_(177r)	Atf3_+_+_(147g)	chr2R:14572789-14573289	LamC	0.2685567459529651	0.3298436758000118
4	Atf3_+_+_(177r)	Atf3_+_+_(147g)	chr2R:14577773-14578273	LamC	0.26231220902327074	0.3298436758000118
5	Atf3_+_+_(177r)	Atf3_+_+_(147g)	chr2L:10690855-10691355	CG7296	0.132504880623941	0.0942613327137964
6	Atf3_+_+_(177r)	Atf3_+_+_(147g)	chr2L:10686951-10687451	CG7296	0.1340014157318151	0.0942613327137964
7	Atf3_+_+_(177r)	Atf3_+_+_(147g)	chr3R:8127018-8127518	puc	0.2549079421254399	0.2606369779501323
8	Atf3_+_+_(177r)	Atf3_+_+_(147g)	chr3R:8107818-8108318	puc	0.29176361016950736	0.2606369779501323
9	Atf3_+_+_(177r)	Atf3_+_+_(147g)	chr3R:30789114-30789614	cindr	0.09681454002005631	0.283384680050425
10	Atf3_+_+_(177r)	Atf3_+_+_(147g)	chr3R:30816157-30816657	cindr	0.3328276969332458	0.283384680050425
11	Atf3_+_+_(177r)	Atf3_+_+_(147g)	chr2R:16093997-16094497	Dg	0.15966132741470454	0.2280742561702763
12	Atf3_+_+_(177r)	Atf3_+_+_(147g)	chr3R:18444922-18445422	fru	0.33697856915762764	0.4204614770560953
13	Atf3_+_+_(177r)	Atf3_+_+_(147g)	chr3R:18476441-18476941	fru	0.3667293688239582	0.4204614770560953
14	Atf3_+_+_(177r)	Atf3_+_+_(147g)	chr3R:18394817-18395317	fru	0.3513824931901068	0.4204614770560953
15	Atf3_+_+_(177r)	Atf3_+_+_(147g)	chr3R:18427703-18428203	fru	0.40099029592016777	0.4204614770560953
16	Atf3_+_+_(177r)	Atf3_+_+_(147g)	chr3R:18441345-18441845	fru	0.4062043066732218	0.4204614770560953
17	Atf3_+_+_(177r)	Atf3_+_+_(147g)	chr3R:18435208-18435708	fru	0.4086839734649043	0.4204614770560953
18	Atf3_+_+_(177r)	Atf3_+_+_(147g)	chr2R:10251813-10252313	CAP	0.08138441550433907	0.1555772670266496
19	Atf3_+_+_(177r)	Atf3_+_+_(147g)	chr2R:10276144-10276644	CAP	0.13128153499283707	0.1555772670266496
20	Atf3_+_+_(177r)	Atf3_+_+_(147g)	chr3L:12202944-12203444	CG11529	0.08194686321314465	0.1162293166486199
21	Atf3_+_+_(177r)	Atf3_+_+_(147g)	chr3L:4109538-4110038	Chd64	0.2745070034086799	0.3513674856426177
22	Atf3_+_+_(177r)	Atf3_+_+_(147g)	chr2R:7688740-7689240	CG2064	0.04038006657655113	0.1155770679149041
23	Atf3_+_+_(177r)	Atf3_+_+_(147g)	chr2R:10473608-10474108	whd	0.051797862774229694	0.0805698095257394
24	Atf3_+_+_(177r)	Atf3_+_+_(147g)	chrX:8579839-8580339	CG12065	0.17669586865630474	0.1752046525851176
25	Atf3_+_+_(177r)	Atf3_+_+_(147g)	chrX:8574868-8575368	CG12065	0.1571334099119412	0.1752046525851176
26	Atf3_+_+_(177r)	Atf3_+_+_(147g)	chrX:8532492-8532992	CG12065	0.14694424743340395	0.1752046525851176
27	Atf3_+_+_(177r)	Atf3_+_+_(147g)	chrX:8536799-8537299	CG12065	0.1841932472029647	0.1752046525851176
28	Atf3_+_+_(177r)	Atf3_+_+_(147g)	chrX:8532492-8532992	Nrg	0.24938456916935103	0.3716141276338589
29	Atf3_+_+_(177r)	Atf3_+_+_(147g)	chrX:8536799-8537299	Nrg	0.23349522657303062	0.3716141276338589
30	Atf3_+_+_(177r)	Atf3_+_+_(147g)	chr2L:1122457-1122957	capt	0.07245137389772757	0.2355734789224778
31	Atf3_+_+_(177r)	Atf3_+_+_(147g)	chr3L:4103830-4104330	Fit1	0.05968639809819511	0.1466334376081571
32	Atf3_+_+_(177r)	Atf3_+_+_(147g)	chrX:17596308-17596808	CG12991	0.21731205199872422	0.2075161314356957
33	Atf3_+_+_(177r)	Atf3_+_+_(147g)	chr2L:8737104-8737604	raw	0.13265694227536945	0.1666633633575034
34	Atf3_+_+_(177r)	Atf3_+_+_(147g)	chr2L:8720962-8721462	raw	0.14799276749075596	0.1666633633575034
35	Atf3_+_+_(177r)	Atf3_+_+_(147g)	chr3R:24550967-24551467	CG5789	0.040142044188760204	0.1005482775718034
36	Atf3_+_+_(177r)	Atf3_+_+_(147g)	chr3R:24549705-24550205	CG5789	0.03058125888354081	0.1005482775718034
37	Atf3_+_+_(177r)	Atf3_+_+_(147g)	chr2L:20880348-20880848	CG9338	0.26034400486405757	0.2210254511326058
38	Atf3_+_+_(177r)	Atf3_+_+_(147g)	chr2L:20859718-20860218	CG9338	0.27378399568749673	0.2210254511326058
39	Atf3_+_+_(177r)	Atf3_+_+_(147g)	chr2L:20907304-20907804	CG9338	0.23293880276859322	0.2210254511326058
40	Atf3_+_+_(177r)	Atf3_+_+_(147g)	chr2L:20858858-20859358	CG9338	0.2719995974565447	0.2210254511326058
41	Atf3_+_+_(177r)	Atf3_+_+_(147g)	chr3R:30152061-30152561	Mlc2	0.18916332473161587	0.231754216049494
42	Atf3_+_+_(177r)	Atf3_+_+_(147g)	chr3L:6700458-6700958	SP1173	0.20631009460407862	0.2776203739752143
43	Atf3_+_+_(177r)	Atf3_+_+_(147g)	chr3L:6694267-6694767	SP1173	0.22382306813526479	0.2776203739752143
44	Atf3_+_+_(177r)	Atf3_+_+_(147g)	chr3L:6702155-6702655	SP1173	0.2342804440542563	0.2776203739752143
45	Atf3_+_+_(177r)	Atf3_+_+_(147g)	chr3L:6698011-6698511	SP1173	0.26371198081054925	0.2776203739752143
46	Atf3_+_+_(177r)	Atf3_+_+_(147g)	chr3L:12202944-12203444	Ak1	0.034555918152989064	0.0820655991615343
47	Atf3_+_+_(177r)	Atf3_+_+_(147g)	chr2R:11051824-11052324	luna	0.29270862812880794	0.3216696086585411
48	Atf3_+_+_(177r)	Atf3_+_+_(147g)	chrX:16719534-16720034	if	0.06154768172698267	0.0910799105217968
49	Atf3_+_+_(177r)	Atf3_+_+_(147g)	chr2L:5111500-5112000	CG5828	0.032148882809793625	0.0827226944341008
50	Atf3_+_+_(177r)	Atf3_+_+_(147g)	chr2R:13929412-13929912	shot	0.26257699388575845	0.3162647951717643
51	Atf3_+_+_(177r)	Atf3_+_+_(147g)	chr2R:13913988-13914488	shot	0.2170558496657715	0.3162647951717643
52	Atf3_+_+_(177r)	Atf3_+_+_(147g)	chr2R:13899216-13899716	shot	0.2272074292644068	0.3162647951717643
53	Atf3_+_+_(177r)	Atf3_+_+_(147g)	chr2R:13898576-13899076	shot	0.25246080020078737	0.3162647951717643
54	Atf3_+_+_(177r)	Atf3_+_+_(147g)	chrX:17293947-17294447	Fim	0.23039266229828365	0.2544304107900129
55	Atf3_+_+_(177r)	Atf3_+_+_(147g)	chrX:9076955-9077455	CG44325	0.1249481115102415	0.2748056150679032
56	Atf3_+_+_(177r)	Atf3_+_+_(147g)	chrX:9076388-9076888	CG44325	0.13026390019412054	0.2748056150679032
57	Atf3_+_+_(177r)	Atf3_+_+_(147g)	chrX:9075646-9076146	CG44325	0.14865650802742955	0.2748056150679032
58	Atf3_+_+_(177r)	Atf3_+_+_(147g)	chr3R:30152061-30152561	CG15529	0.17240401049621057	0.1361307495827649
59	Atf3_+_+_(177r)	Atf3_+_+_(147g)	chr2L:20907304-20907804	CG31675	0.05597757257753796	0.0793124179546463
60	Atf3_+_+_(177r)	Atf3_+_+_(147g)	chr2L:20911158-20911658	CG31675	0.05201272140089322	0.0793124179546463
61	Atf3_+_+_(177r)	Atf3_+_+_(147g)	chr2L:20858858-20859358	CG31675	0.06058172423983641	0.0793124179546463
62	Atf3_+_+_(177r)	Atf3_+_+_(147g)	chr2L:20880348-20880848	CG31675	0.06919539539475772	0.0793124179546463
63	Atf3_+_+_(177r)	Atf3_+_+_(147g)	chr2L:20859718-20860218	CG31675	0.06730451531165331	0.0793124179546463
64	Atf3_+_+_(177r)	Atf3_+_+_(147g)	chr3R:10167946-10168446	Best1	0.12725986279404283	0.1504432001141509
65	Atf3_+_+_(177r)	Atf3_+_+_(147g)	chr3R:10175802-10176302	Best1	0.13343545033327417	0.1504432001141509
66	Atf3_+_+_(177r)	Atf3_+_+_(147g)	chr3R:10186540-10187040	Best1	0.1281910736407745	0.1504432001141509
67	Atf3_+_+_(177r)	Atf3_+_+_(147g)	chr3L:15140317-15140817	CG32147	0.05588616427183732	0.1527637979225558
68	Atf3_+_+_(177r)	Atf3_+_+_(147g)	chr3R:23051186-23051686	CG17111	0.031937264909735516	0.0896208157825575
69	Atf3_+_+_(177r)	Atf3_+_+_(147g)	chr2L:19415170-19415670	Pax	0.21093837001784593	0.2420701612144224
70	Atf3_+_+_(177r)	Atf3_+_+_(147g)	chr2L:19420965-19421465	Pax	0.25209191740777737	0.2420701612144224
71	Atf3_+_+_(177r)	Atf3_+_+_(147g)	chr3R:24798790-24799290	CG13631	0.08640968704164598	0.1304125453625912
72	Atf3_+_+_(177r)	Atf3_+_+_(147g)	chr3R:24799306-24799806	CG13631	0.0517365327973104	0.1304125453625912
73	Atf3_+_+_(177r)	Atf3_+_+_(147g)	chrX:20147875-20148375	aspr	0.32660792188866306	0.1912702375058293
74	Atf3_+_+_(177r)	Atf3_+_+_(147g)	chrX:8579839-8580339	CG12112	0.11117282319780782	0.1533391813956477
75	Atf3_+_+_(177r)	Atf3_+_+_(147g)	chrX:8536799-8537299	CG12112	0.11678966176223128	0.1533391813956477
76	Atf3_+_+_(177r)	Atf3_+_+_(147g)	chrX:8532492-8532992	CG12112	0.11417327746720903	0.1533391813956477
77	Atf3_+_+_(177r)	Atf3_+_+_(147g)	chr2L:5153211-5153711	Msp300	0.14309225650506333	0.4021787058210183
78	Atf3_+_+_(177r)	Atf3_+_+_(147g)	chr2L:5111500-5112000	Msp300	0.2079821601895368	0.4021787058210183
79	Atf3_+_+_(177r)	Atf3_+_+_(147g)	chr2L:5152158-5152658	Msp300	0.18757795495992668	0.4021787058210183
80	Atf3_+_+_(177r)	Atf3_+_+_(147g)	chr2R:24587581-24588081	Cyp9c1	0.11707809782880539	0.2197605285380471
81	Atf3_+_+_(177r)	Atf3_+_+_(147g)	chr2L:20911158-20911658	sky	0.09550037854650034	0.1318301463030577
82	Atf3_+_+_(177r)	Atf3_+_+_(147g)	chr2L:20907304-20907804	sky	0.10604312167990981	0.1318301463030577
83	Atf3_+_+_(177r)	Atf3_+_+_(147g)	chr2L:20859718-20860218	sky	0.07336883321218532	0.1318301463030577
84	Atf3_+_+_(177r)	Atf3_+_+_(147g)	chrX:8271303-8271803	Corp	0.0732644663062871	0.059986438825013
85	Atf3_+_+_(177r)	Atf3_+_+_(147g)	chrX:8258865-8259365	Corp	0.06420380928813109	0.059986438825013
86	Atf3_+_+_(177r)	Atf3_+_+_(147g)	chrX:8233296-8233796	Corp	0.06250209303481316	0.059986438825013
87	Atf3_+_+_(177r)	Atf3_+_+_(147g)	chrX:6539076-6539576	CG42340	0.0909661639909615	0.05567284884218
88	Atf3_+_+_(177r)	Atf3_+_+_(147g)	chr2L:20714435-20714935	Hr38	0.10196893080925208	0.0361193545000532
89	Atf3_+_+_(177r)	Atf3_+_+_(147g)	chrX:5010219-5010719	ovo	0.22354712731184373	0.2308407061199276
90	Atf3_+_+_(177r)	Atf3_+_+_(147g)	chr2R:17084779-17085279	CG30460	0.09748323835933577	0.1278731073627118
91	Atf3_+_+_(177r)	Atf3_+_+_(147g)	chr2R:17107743-17108243	CG30460	0.09848113079698906	0.1278731073627118
92	Atf3_+_+_(177r)	Atf3_+_+_(147g)	chr2R:17110778-17111278	CG30460	0.10486903210807977	0.1278731073627118
93	Atf3_+_+_(177r)	Atf3_+_+_(147g)	chr3R:12716396-12716896	NijC	0.07039254598222255	0.1195052463915743
94	Atf3_+_+_(177r)	Atf3_+_+_(147g)	chrX:2085912-2086412	CG4199	0.177873032823631	0.2674983518534757
95	Atf3_+_+_(177r)	Atf3_+_+_(147g)	chrX:2051359-2051859	CG4199	0.1323458445749108	0.2674983518534757
96	Atf3_+_+_(177r)	Atf3_+_+_(147g)	chrX:4136436-4136936	cib	0.1524120618324391	0.3541944827032303
97	Atf3_+_+_(177r)	Atf3_+_+_(147g)	chrX:4111266-4111766	cib	0.20443368414566532	0.3541944827032303
98	Atf3_+_+_(177r)	Atf3_+_+_(147g)	chr3L:2142934-2143434	CG15879	0.035861384766183134	0.0671683396928627
99	Atf3_+_+_(177r)	Atf3_+_+_(147g)	chr2R:18897276-18897776	sano	0.12900729112055112	0.2667807870325341
100	Atf3_+_+_(177r)	Atf3_+_+_(147g)	chr2L:13078614-13079114	CG9932	0.4667226179329585	0.3480507428671494
101	Atf3_+_+_(177r)	Atf3_+_+_(147g)	chr2L:19537138-19537638	Top3alpha	0.04809088038501629	0.1154455912233298
102	Atf3_+_+_(177r)	Atf3_+_+_(147g)	chr2R:10276144-10276644	CG12911	0.07634201822207713	0.1463849347775252
103	Atf3_+_+_(177r)	Atf3_+_+_(147g)	chr2R:10251813-10252313	CG12911	0.04922619003346567	0.1463849347775252
104	Atf3_+_+_(177r)	Atf3_+_+_(147g)	chr3R:4737876-4738376	tacc	0.1024404417299376	0.2196575033104955
105	Atf3_+_+_(177r)	Atf3_+_+_(147g)	chr2R:12381813-12382313	Cpr49Ah	0.09381896470506147	0.0522619190600909
106	Atf3_+_+_(177r)	Atf3_+_+_(147g)	chr2R:12438675-12439175	Cpr49Ah	0.06430806784132537	0.0522619190600909
107	Atf3_+_+_(177r)	Atf3_+_+_(147g)	chr3L:19137251-19137751	CG14082	0.1834294134841158	0.180204591194051
108	Atf3_+_+_(177r)	Atf3_+_+_(147g)	chr3L:19089694-19090194	CG14082	0.1860671681483657	0.180204591194051
109	Atf3_+_+_(177r)	Atf3_+_+_(147g)	chr3L:19089179-19089679	CG14082	0.1789269429621245	0.180204591194051
110	Atf3_+_+_(177r)	Atf3_+_+_(147g)	chrX:12467550-12468050	CG42258	0.06920077568168248	0.1651493682648507
111	Atf3_+_+_(177r)	Atf3_+_+_(147g)	chrX:12473880-12474380	CG42258	0.04273246373623825	0.1651493682648507
112	Atf3_+_+_(177r)	Atf3_+_+_(147g)	chr2L:10690855-10691355	CG7294	0.20553949048087025	0.1684492642229693
113	Atf3_+_+_(177r)	Atf3_+_+_(147g)	chr2L:10686951-10687451	CG7294	0.1794293913941331	0.1684492642229693
114	Atf3_+_+_(177r)	Atf3_+_+_(147g)	chr3L:4109538-4110038	Ras64B	0.05504044041830932	0.1781089853073289
115	Atf3_+_+_(177r)	Atf3_+_+_(147g)	chr2R:17371225-17371725	CG10939	0.13598397702625756	0.2760057326309478
116	Atf3_+_+_(177r)	Atf3_+_+_(147g)	chrX:11559898-11560398	PGRP-SA	0.2738255844974567	0.1712645939543722
117	Atf3_+_+_(177r)	Atf3_+_+_(147g)	chr2L:7090646-7091146	Pvf2	0.258635328537429	0.1889054882139664
118	Atf3_+_+_(177r)	Atf3_+_+_(147g)	chrX:6539076-6539576	CG34417	0.3012677127725479	0.3358124609077664
119	Atf3_+_+_(177r)	Atf3_+_+_(147g)	chrX:6604000-6604500	CG34417	0.23643171041393948	0.3358124609077664
120	Atf3_+_+_(177r)	Atf3_+_+_(147g)	chr2L:520328-520828	Tspo	0.13069908273678074	0.3012410122804437
121	Atf3_+_+_(177r)	Atf3_+_+_(147g)	chrX:11559898-11560398	CG1572	0.4786670542957642	0.3423328299097065
122	Atf3_+_+_(177r)	Atf3_+_+_(147g)	chr2R:5812909-5813409	ZnT41F	0.06081158306418789	0.0792374739142876
123	Atf3_+_+_(177r)	Atf3_+_+_(147g)	chrX:21306518-21307018	CG32521	0.1504722069036616	0.2713619459511095
124	Atf3_+_+_(177r)	Atf3_+_+_(147g)	chrX:11418318-11418818	Sk1	0.06807895293779546	0.0886793941074345
125	Atf3_+_+_(177r)	Atf3_+_+_(147g)	chrX:11446754-11447254	Sk1	0.08225294269593257	0.0886793941074345
126	Atf3_+_+_(177r)	Atf3_+_+_(147g)	chr2R:22389225-22389725	babos	0.12046421355812642	0.229050756061968
127	Atf3_+_+_(177r)	Atf3_+_+_(147g)	chr2R:23392965-23393465	CG9815	0.12600249115467696	0.1101100915829593
128	Atf3_+_+_(177r)	Atf3_+_+_(147g)	chr2L:20858858-20859358	CG9336	0.3857862873398609	0.3271252462604132
129	Atf3_+_+_(177r)	Atf3_+_+_(147g)	chr2L:20859718-20860218	CG9336	0.3937800968248864	0.3271252462604132
130	Atf3_+_+_(177r)	Atf3_+_+_(147g)	chr2L:20907304-20907804	CG9336	0.30076342057729233	0.3271252462604132
131	Atf3_+_+_(177r)	Atf3_+_+_(147g)	chr2L:20880348-20880848	CG9336	0.23191116560773775	0.3271252462604132
132	Atf3_+_+_(177r)	Atf3_+_+_(147g)	chr2R:19233759-19234259	cora	0.047520332983520194	0.2350702362750914
133	Atf3_+_+_(177r)	Atf3_+_+_(147g)	chrX:8258865-8259365	sdt	0.1761821890393415	0.2608695765768497
134	Atf3_+_+_(177r)	Atf3_+_+_(147g)	chrX:8271303-8271803	sdt	0.14137020259861324	0.2608695765768497
135	Atf3_+_+_(177r)	Atf3_+_+_(147g)	chr3R:15556876-15557376	AOX3	0.12536406116575982	0.2001881114734771
136	Atf3_+_+_(177r)	Atf3_+_+_(147g)	chr3R:15553699-15554199	AOX3	0.10405539125298527	0.2001881114734771
137	Atf3_+_+_(177r)	Atf3_+_+_(147g)	chr2R:19418794-19419294	par-1	0.09146379312689595	0.3022853343136613
138	Atf3_+_+_(177r)	Atf3_+_+_(147g)	chr2R:19421837-19422337	par-1	0.12228788316816847	0.3022853343136613
139	Atf3_+_+_(177r)	Atf3_+_+_(147g)	chr3L:4225723-4226223	Cpr64Aa	0.12354424116190617	0.1147223549681263
140	Atf3_+_+_(177r)	Atf3_+_+_(147g)	chr2R:18125868-18126368	Spn55B	0.07181327850382273	0.1689307752661012
141	Atf3_+_+_(177r)	Atf3_+_+_(147g)	chr3R:24799306-24799806	Ude	0.120509447323406	0.1826411990077645
142	Atf3_+_+_(177r)	Atf3_+_+_(147g)	chr3R:24798790-24799290	Ude	0.1755575506927873	0.1826411990077645
143	Atf3_+_+_(177r)	Atf3_+_+_(147g)	chr3R:31588289-31588789	CG1635	0.06290229123790257	0.1056638168212903
144	Atf3_+_+_(177r)	Atf3_+_+_(147g)	chr3R:19665715-19666215	CG6231	0.050633852306302594	0.0531946103423217
145	Atf3_+_+_(177r)	Atf3_+_+_(147g)	chr3R:19628474-19628974	CG6231	0.1031660180160458	0.0531946103423217
146	Atf3_+_+_(177r)	Atf3_+_+_(147g)	chr2R:14265362-14265862	CG8547	0.1285008829271367	0.2789039222279743
147	Atf3_+_+_(177r)	Atf3_+_+_(147g)	chrX:17688462-17688962	raskol	0.14305205855923026	0.2487502324029235
148	Atf3_+_+_(177r)	Atf3_+_+_(147g)	chrX:17691388-17691888	raskol	0.1484828383052399	0.2487502324029235
149	Atf3_+_+_(177r)	Atf3_+_+_(147g)	chr2R:20581007-20581507	Rcd6	0.09388211098072013	0.1263057768214431
150	Atf3_+_+_(177r)	Atf3_+_+_(147g)	chr3R:17113714-17114214	cher	0.22344839830671218	0.2992265069707162
151	Atf3_+_+_(177r)	Atf3_+_+_(147g)	chr2R:24273822-24274322	nvy	0.18684075363752564	0.1272254586257539
152	Atf3_+_+_(177r)	Atf3_+_+_(147g)	chr2R:24749416-24749916	Reg-5	0.0313591910118578	0.139899732720833
153	Atf3_+_+_(177r)	Atf3_+_+_(147g)	chr2L:16755725-16756225	yellow-b	0.4832814886972088	0.2573715619068827
154	Atf3_+_+_(177r)	Atf3_+_+_(147g)	chr2R:15899120-15899620	Strn-Mlck	0.06508220133203904	0.098327600470538
155	Atf3_+_+_(177r)	Atf3_+_+_(147g)	chr2R:15951149-15951649	Strn-Mlck	0.0396444763291384	0.098327600470538
156	Atf3_+_+_(177r)	Atf3_+_+_(147g)	chr2L:8164485-8164985	Piezo	0.20360354445173837	0.2317887598424999
157	Atf3_+_+_(177r)	Atf3_+_+_(147g)	chr2L:8171620-8172120	Piezo	0.1681170804230783	0.2317887598424999
158	Atf3_+_+_(177r)	Atf3_+_+_(147g)	chr2L:19420965-19421465	CG17549	0.1842992157761017	0.2663440878504988
159	Atf3_+_+_(177r)	Atf3_+_+_(147g)	chr2L:19415170-19415670	CG17549	0.15733689851223712	0.2663440878504988
160	Atf3_+_+_(177r)	Atf3_+_+_(147g)	chr3L:16699820-16700320	Dab	0.0497269911434667	0.1056496243869361
161	Atf3_+_+_(177r)	Atf3_+_+_(147g)	chr3R:22636187-22636687	Gclm	0.036231779002081306	0.133704036282169
162	Atf3_+_+_(177r)	Atf3_+_+_(147g)	chr3R:26982754-26983254	CG46339	0.30400315515330556	0.2472212019135117
163	Atf3_+_+_(177r)	Atf3_+_+_(147g)	chr3R:26953005-26953505	CG46339	0.2843116615137825	0.2472212019135117
164	Atf3_+_+_(177r)	Atf3_+_+_(147g)	chr3R:26926905-26927405	CG46339	0.27899715469515	0.2472212019135117
165	Atf3_+_+_(177r)	Atf3_+_+_(147g)	chr2R:16104629-16105129	Rho1	0.07629480274312957	0.319996915319209
166	Atf3_+_+_(177r)	Atf3_+_+_(147g)	chr3L:7325574-7326074	Sh3beta	0.1619507646831356	0.2936102602296901
167	Atf3_+_+_(177r)	Atf3_+_+_(147g)	chr3L:3347545-3348045	CG14968	0.12039487204212461	0.201565900909228
168	Atf3_+_+_(177r)	Atf3_+_+_(147g)	chr3L:13946013-13946513	CG32137	0.14117504210516557	0.1602147145637159
169	Atf3_+_+_(177r)	Atf3_+_+_(147g)	chr3L:11217739-11218239	CG42671	0.19842269135478705	0.2138178292346258
170	Atf3_+_+_(177r)	Atf3_+_+_(147g)	chr3L:12101641-12102141	Sema5c	0.11804176061842944	0.2110352472202479
171	Atf3_+_+_(177r)	Atf3_+_+_(147g)	chr2R:17110778-17111278	CG43107	0.06757720042520457	0.0682744099396671
172	Atf3_+_+_(177r)	Atf3_+_+_(147g)	chr2L:12469635-12470135	bun	0.152482651855207	0.3304161315105359
173	Atf3_+_+_(177r)	Atf3_+_+_(147g)	chr2L:13269135-13269635	CG44085	0.39214116930520965	0.2217915359122048
174	Atf3_+_+_(177r)	Atf3_+_+_(147g)	chr3L:217645-218145	Vdup1	0.031338958904871296	0.2271229529844456
175	Atf3_+_+_(177r)	Atf3_+_+_(147g)	chr2R:6870000-6870500	coro	0.07080510838606066	0.2053649391402448
176	Atf3_+_+_(177r)	Atf3_+_+_(147g)	chr2R:6867453-6867953	coro	0.10562078172292083	0.2053649391402448
177	Atf3_+_+_(177r)	Atf3_+_+_(147g)	chr3R:24549705-24550205	Esyt2	0.24461949518231552	0.2293546168515402
178	Atf3_+_+_(177r)	Atf3_+_+_(147g)	chr3R:24550967-24551467	Esyt2	0.24231850127536303	0.2293546168515402
179	Atf3_+_+_(177r)	Atf3_+_+_(147g)	chr3L:2142934-2143434	zormin	0.13970243392973028	0.2523527451484212
180	Atf3_+_+_(177r)	Atf3_+_+_(147g)	chr2L:16257964-16258464	EndoGI	0.08956697076184032	0.1948437253424684
181	Atf3_+_+_(177r)	Atf3_+_+_(147g)	chr2L:12054536-12055036	Ced-12	0.043870977796714485	0.0773176221270163
182	Atf3_+_+_(177r)	Atf3_+_+_(147g)	chr3L:10658242-10658742	Adi1	0.04775347179233558	0.1528953375564626
183	Atf3_+_+_(177r)	Atf3_+_+_(147g)	chr2L:13269135-13269635	CG16820	0.04871827351030981	0.0617700741808595
184	Atf3_+_+_(177r)	Atf3_+_+_(147g)	chr2L:15035975-15036475	yellow-c	0.16045899592677632	0.1654179979884161
185	Atf3_+_+_(177r)	Atf3_+_+_(147g)	chr2R:6684061-6684561	Tdc1	0.2546479055037325	0.128029707542714
186	Atf3_+_+_(177r)	Atf3_+_+_(147g)	chr2R:6681855-6682355	Tdc1	0.25135095938680746	0.128029707542714
187	Atf3_+_+_(177r)	Atf3_+_+_(147g)	chrX:9931779-9932279	Idgf4	0.30428534197662144	0.2627091721894444
188	Atf3_+_+_(177r)	Atf3_+_+_(147g)	chr3L:3426036-3426536	CG12012	0.05279258539106904	0.130392183493281
189	Atf3_+_+_(177r)	Atf3_+_+_(147g)	chrX:2539638-2540138	trol	0.3835447536928061	0.2836890493735741
190	Atf3_+_+_(177r)	Atf3_+_+_(147g)	chr2R:7049430-7049930	Tsp42El	0.19493645317329986	0.1834529721394898
191	Atf3_+_+_(177r)	Atf3_+_+_(147g)	chr2L:9429666-9430166	Aldh	0.22109449614220952	0.2950138936624327
192	Atf3_+_+_(177r)	Atf3_+_+_(147g)	chr2L:9387935-9388435	Aldh	0.13394667621387168	0.2950138936624327
193	Atf3_+_+_(177r)	Atf3_+_+_(147g)	chr2R:24996452-24996952	zip	0.26351303837654483	0.3357039672101967
194	Atf3_+_+_(177r)	Atf3_+_+_(147g)	chr2L:11526488-11526988	CG31705	0.1700037613280736	0.2367958267734448
195	Atf3_+_+_(177r)	Atf3_+_+_(147g)	chr3R:19632557-19633057	subdued	0.12292869901801191	0.1214849196135223
196	Atf3_+_+_(177r)	Atf3_+_+_(147g)	chr3L:14054882-14055382	btl	0.03830058018538304	0.0685037893569626
197	Atf3_+_+_(177r)	Atf3_+_+_(147g)	chrX:19135478-19135978	RhoGAP18B	0.23995162444702817	0.2021408076440855
198	Atf3_+_+_(177r)	Atf3_+_+_(147g)	chrX:9075646-9076146	rdgA	0.16125217356597807	0.2050040282217982
199	Atf3_+_+_(177r)	Atf3_+_+_(147g)	chr3R:30152061-30152561	CG31028	0.04517752915338871	0.1075061709176296
200	Atf3_+_+_(177r)	Atf3_+_+_(147g)	chr3L:16895367-16895867	Lmpt	0.17777121487416972	0.2454091469334016
201	Atf3_+_+_(177r)	Atf3_+_+_(147g)	chr3R:21094257-21094757	Cortactin	0.05592735290034212	0.1732841581573836
202	Atf3_+_+_(177r)	Atf3_+_+_(147g)	chr2L:5764465-5764965	obst-E	0.2577770116716573	0.2209116346103518
203	Atf3_+_+_(177r)	Atf3_+_+_(147g)	chr3L:4109538-4110038	Rop	0.036920853146143476	0.1328360448590117
204	Atf3_+_+_(177r)	Atf3_+_+_(147g)	chr3L:22711361-22711861	l(3)04053	0.042464897298984665	0.1203702142905096
205	Atf3_+_+_(177r)	Atf3_+_+_(147g)	chrX:16719534-16720034	CG34325	0.27205930157721114	0.2071619423880486
206	Atf3_+_+_(177r)	Atf3_+_+_(147g)	chrX:13406251-13406751	GstT4	0.08783512222615923	0.1707644508721268
207	Atf3_+_+_(177r)	Atf3_+_+_(147g)	chr2R:13839817-13840317	CG6357	0.16008639650882261	0.1789717441171718
208	Atf3_+_+_(177r)	Atf3_+_+_(147g)	chr3R:16032172-16032672	IKKbeta	0.03468098370301822	0.0939718751991218
209	Atf3_+_+_(177r)	Atf3_+_+_(147g)	chr3L:2142934-2143434	CG5704	0.0366364217528462	0.0761097687663309
210	Atf3_+_+_(177r)	Atf3_+_+_(147g)	chr3L:1242220-1242720	CG9192	0.18399494313862455	0.1577792194902126
211	Atf3_+_+_(177r)	Atf3_+_+_(147g)	chr2R:14482778-14483278	CG30197	0.04486457927393028	0.0952593702013239
212	Atf3_+_+_(177r)	Atf3_+_+_(147g)	chrX:13804382-13804882	jub	0.03584758449207308	0.1535373493001583
213	Atf3_+_+_(177r)	Atf3_+_+_(147g)	chr2L:2802248-2802748	CG2975	0.13423794113211543	0.118112154116882
214	Atf3_+_+_(177r)	Atf3_+_+_(147g)	chr3R:21094257-21094757	AnxB9	0.1328789397971545	0.3440999559985833
215	Atf3_+_+_(177r)	Atf3_+_+_(147g)	chr3R:23051186-23051686	CG17121	0.08908661552469876	0.1957195628493279
216	Atf3_+_+_(177r)	Atf3_+_+_(147g)	chrX:8418617-8419117	CG12123	0.034988218090452335	0.0754448995436123
217	Atf3_+_+_(177r)	Atf3_+_+_(147g)	chrX:1241917-1242417	DAAM	0.13647328090366717	0.1849910356123505
218	Atf3_+_+_(177r)	Atf3_+_+_(147g)	chrX:13815158-13815658	mamo	0.1274987209430668	0.0961681088871755
219	Atf3_+_+_(177r)	Atf3_+_+_(147g)	chr2R:21073582-21074082	CG10527	0.37187819052281723	0.284503832183973
220	Atf3_+_+_(177r)	Atf3_+_+_(147g)	chr2R:23392965-23393465	CG3520	0.044953793195020526	0.0582132442210963
221	Atf3_+_+_(177r)	Atf3_+_+_(147g)	chr3R:13742187-13742687	Dip-B	0.10701558024690312	0.1824738989384054
0	Atf6_+_+_(180r)	Atf6_+_+_(220g)	chr2L:7711205-7711705	Tep3	0.04175532739957738	0.1305007129030437
1	Atf6_+_+_(180r)	Atf6_+_+_(220g)	chr2L:16755725-16756225	CG31808	0.07558488606596309	0.0410371543571674
2	Atf6_+_+_(180r)	Atf6_+_+_(220g)	chr2L:10690855-10691355	CG7296	0.132504880623941	0.0641339231878939
3	Atf6_+_+_(180r)	Atf6_+_+_(220g)	chr2L:10686951-10687451	CG7296	0.1340014157318151	0.0641339231878939
4	Atf6_+_+_(180r)	Atf6_+_+_(220g)	chr2L:20907304-20907804	Mtp	0.04593067258391843	0.1418685882096247
5	Atf6_+_+_(180r)	Atf6_+_+_(220g)	chr3R:17114601-17115101	Mur89F	0.06973213151528486	0.0402246829401439
6	Atf6_+_+_(180r)	Atf6_+_+_(220g)	chrX:18282058-18282558	CG6023	0.04970944635910629	0.0463068887317419
7	Atf6_+_+_(180r)	Atf6_+_+_(220g)	chrX:13703154-13703654	CG11158	0.06499762246023179	0.0928330825416805
8	Atf6_+_+_(180r)	Atf6_+_+_(220g)	chr3L:15140317-15140817	Cep135	0.05702500538843153	0.1438593030010248
9	Atf6_+_+_(180r)	Atf6_+_+_(220g)	chr3L:5542528-5543028	frm	0.24695812875563508	0.1529693793895456
10	Atf6_+_+_(180r)	Atf6_+_+_(220g)	chr3L:5543539-5544039	frm	0.24194089577982128	0.1529693793895456
11	Atf6_+_+_(180r)	Atf6_+_+_(220g)	chr3R:4737876-4738376	smash	0.12763238285332135	0.211828766055234
12	Atf6_+_+_(180r)	Atf6_+_+_(220g)	chrX:13406251-13406751	Neto	0.032949394640990656	0.0580512057091239
13	Atf6_+_+_(180r)	Atf6_+_+_(220g)	chrX:17880354-17880854	CG6847	0.0752537406654883	0.10087631839286
14	Atf6_+_+_(180r)	Atf6_+_+_(220g)	chr2L:47002-47502	net	0.035137637493940936	0.1226242965250852
15	Atf6_+_+_(180r)	Atf6_+_+_(220g)	chr3L:18102201-18102701	CG13698	0.08314595420196487	0.2380082598145272
16	Atf6_+_+_(180r)	Atf6_+_+_(220g)	chr3R:24454007-24454507	nAChRalpha1	0.07119206608310409	0.0342652395243112
17	Atf6_+_+_(180r)	Atf6_+_+_(220g)	chrX:8532492-8532992	Nrg	0.24938456916935103	0.3770065121402262
18	Atf6_+_+_(180r)	Atf6_+_+_(220g)	chrX:8536799-8537299	Nrg	0.23349522657303062	0.3770065121402262
19	Atf6_+_+_(180r)	Atf6_+_+_(220g)	chr3R:16182354-16182854	CG8927	0.06736172890893345	0.0392699600230539
20	Atf6_+_+_(180r)	Atf6_+_+_(220g)	chrX:17596308-17596808	CG12991	0.21731205199872422	0.2007056992492578
21	Atf6_+_+_(180r)	Atf6_+_+_(220g)	chr2L:8737104-8737604	raw	0.13265694227536945	0.1942030059271131
22	Atf6_+_+_(180r)	Atf6_+_+_(220g)	chr2L:8720962-8721462	raw	0.14799276749075596	0.1942030059271131
23	Atf6_+_+_(180r)	Atf6_+_+_(220g)	chr3L:11543684-11544184	rt	0.033800480416297414	0.1087705788162048
24	Atf6_+_+_(180r)	Atf6_+_+_(220g)	chr3L:11550943-11551443	rt	0.052246260685733216	0.1087705788162048
25	Atf6_+_+_(180r)	Atf6_+_+_(220g)	chr2L:7868157-7868657	spz3	0.09165384543422547	0.0607741271337448
26	Atf6_+_+_(180r)	Atf6_+_+_(220g)	chr2L:7869383-7869883	spz3	0.08574881794800289	0.0607741271337448
27	Atf6_+_+_(180r)	Atf6_+_+_(220g)	chr3L:329677-330177	Atac3	0.036457145463202174	0.109588519277309
28	Atf6_+_+_(180r)	Atf6_+_+_(220g)	chr2R:15250015-15250515	scb	0.2563178605164292	0.1303027574107322
29	Atf6_+_+_(180r)	Atf6_+_+_(220g)	chr2R:15244857-15245357	scb	0.17623464016203752	0.1303027574107322
30	Atf6_+_+_(180r)	Atf6_+_+_(220g)	chr2R:11657748-11658248	Tret1-1	0.031763160003780676	0.0702106958364739
31	Atf6_+_+_(180r)	Atf6_+_+_(220g)	chr2R:11805504-11806004	CG34229	0.030403058325769394	0.0645229781794485
32	Atf6_+_+_(180r)	Atf6_+_+_(220g)	chr2L:20798967-20799467	Fs(2)Ket	0.07814576657232583	0.3200669474836481
33	Atf6_+_+_(180r)	Atf6_+_+_(220g)	chrX:11418318-11418818	Evi5	0.10404111037327136	0.1949048389862095
34	Atf6_+_+_(180r)	Atf6_+_+_(220g)	chrX:11446754-11447254	Evi5	0.12616574004616954	0.1949048389862095
35	Atf6_+_+_(180r)	Atf6_+_+_(220g)	chr3L:13946013-13946513	Rgl	0.09219810351315431	0.2030500767069583
36	Atf6_+_+_(180r)	Atf6_+_+_(220g)	chrX:9076955-9077455	CG44325	0.1249481115102415	0.2617272368129739
37	Atf6_+_+_(180r)	Atf6_+_+_(220g)	chrX:9076388-9076888	CG44325	0.13026390019412054	0.2617272368129739
38	Atf6_+_+_(180r)	Atf6_+_+_(220g)	chrX:9075646-9076146	CG44325	0.14865650802742955	0.2617272368129739
39	Atf6_+_+_(180r)	Atf6_+_+_(220g)	chr2R:20581007-20581507	HnRNP-K	0.11248613034678306	0.2874964032534361
40	Atf6_+_+_(180r)	Atf6_+_+_(220g)	chr2L:12645849-12646349	nub	0.4820419956985359	0.1766322407769088
41	Atf6_+_+_(180r)	Atf6_+_+_(220g)	chr2L:1122457-1122957	ast	0.03948082350518894	0.0916144626795807
42	Atf6_+_+_(180r)	Atf6_+_+_(220g)	chr3L:17608779-17609279	Eip74EF	0.17987152302302264	0.1828915830703062
43	Atf6_+_+_(180r)	Atf6_+_+_(220g)	chr2L:7090646-7091146	milt	0.10046562275439316	0.2169693618863226
44	Atf6_+_+_(180r)	Atf6_+_+_(220g)	chrX:14711022-14711522	NetB	0.17697436586173723	0.1196427345094865
45	Atf6_+_+_(180r)	Atf6_+_+_(220g)	chr2L:8164485-8164985	PAPLA1	0.03502121009905469	0.1191192369138432
46	Atf6_+_+_(180r)	Atf6_+_+_(220g)	chr2R:10473608-10474108	RanBPM	0.04850027413296768	0.1347826647153499
47	Atf6_+_+_(180r)	Atf6_+_+_(220g)	chr2R:11657748-11658248	tou	0.044494271662047655	0.3429521984899824
48	Atf6_+_+_(180r)	Atf6_+_+_(220g)	chr2R:6023547-6024047	Src42A	0.06158963942888008	0.2454668222261132
49	Atf6_+_+_(180r)	Atf6_+_+_(220g)	chr2L:16355678-16356178	chif	0.032606727860693435	0.210094333336815
50	Atf6_+_+_(180r)	Atf6_+_+_(220g)	chr3L:15140317-15140817	CG32147	0.05588616427183732	0.1376969410132467
51	Atf6_+_+_(180r)	Atf6_+_+_(220g)	chr2R:15899120-15899620	bug	0.0378601055266899	0.1129100632522151
52	Atf6_+_+_(180r)	Atf6_+_+_(220g)	chrX:15079840-15080340	drd	0.06809344360739439	0.0468222194627258
53	Atf6_+_+_(180r)	Atf6_+_+_(220g)	chr3R:25735465-25735965	LpR1	0.030854906619116957	0.1450358534476634
54	Atf6_+_+_(180r)	Atf6_+_+_(220g)	chr2L:8233418-8233918	CG8475	0.03567981956937458	0.0689970882128574
55	Atf6_+_+_(180r)	Atf6_+_+_(220g)	chrX:13406251-13406751	CG1673	0.03802898213199555	0.0888598897411631
56	Atf6_+_+_(180r)	Atf6_+_+_(220g)	chr3R:30816157-30816657	CG15544	0.09368994010246401	0.0939908006551322
57	Atf6_+_+_(180r)	Atf6_+_+_(220g)	chr2R:24751337-24751837	CG12848	0.05996755555879607	0.1470824895387012
58	Atf6_+_+_(180r)	Atf6_+_+_(220g)	chr2R:19171337-19171837	hppy	0.0858258898422242	0.198994514202597
59	Atf6_+_+_(180r)	Atf6_+_+_(220g)	chr2R:19233759-19234259	hppy	0.06892233955811831	0.198994514202597
60	Atf6_+_+_(180r)	Atf6_+_+_(220g)	chrX:10718297-10718797	X11Lbeta	0.05599998501369416	0.0489783883763153
61	Atf6_+_+_(180r)	Atf6_+_+_(220g)	chr2L:8171620-8172120	CG43394	0.06378507428264023	0.0979199457732825
62	Atf6_+_+_(180r)	Atf6_+_+_(220g)	chr2L:8164485-8164985	CG43394	0.08703189881490658	0.0979199457732825
63	Atf6_+_+_(180r)	Atf6_+_+_(220g)	chr2R:23392965-23393465	eIF2Bdelta	0.03606019811933034	0.1618069262463073
64	Atf6_+_+_(180r)	Atf6_+_+_(220g)	chr2L:20911158-20911658	sky	0.09550037854650034	0.1251685860994376
65	Atf6_+_+_(180r)	Atf6_+_+_(220g)	chr2L:20907304-20907804	sky	0.10604312167990981	0.1251685860994376
66	Atf6_+_+_(180r)	Atf6_+_+_(220g)	chr2L:20859718-20860218	sky	0.07336883321218532	0.1251685860994376
67	Atf6_+_+_(180r)	Atf6_+_+_(220g)	chr2R:15235676-15236176	Trpm	0.03627102653366015	0.1262412794013203
68	Atf6_+_+_(180r)	Atf6_+_+_(220g)	chr3R:13742187-13742687	f-cup	0.036184619632819194	0.0669790865261801
69	Atf6_+_+_(180r)	Atf6_+_+_(220g)	chrX:1511985-1512485	rush	0.04962266555071042	0.0623778177274843
70	Atf6_+_+_(180r)	Atf6_+_+_(220g)	chr2L:7711205-7711705	Tep2	0.09182987030822817	0.1024108969451843
71	Atf6_+_+_(180r)	Atf6_+_+_(220g)	chr2L:20714435-20714935	Hr38	0.10196893080925208	0.0412912179188769
72	Atf6_+_+_(180r)	Atf6_+_+_(220g)	chr2R:10733585-10734085	CG12338	0.036097097140939886	0.0699296992775316
73	Atf6_+_+_(180r)	Atf6_+_+_(220g)	chr2L:10745966-10746466	CG31869	0.3536348363512533	0.151360861408215
74	Atf6_+_+_(180r)	Atf6_+_+_(220g)	chr3R:12716396-12716896	NijC	0.07039254598222255	0.040405673090363
75	Atf6_+_+_(180r)	Atf6_+_+_(220g)	chr3R:27593191-27593691	dsd	0.07926241172252298	0.2097757127360821
76	Atf6_+_+_(180r)	Atf6_+_+_(220g)	chr3R:27556851-27557351	dsd	0.07777180619449231	0.2097757127360821
77	Atf6_+_+_(180r)	Atf6_+_+_(220g)	chrX:2085912-2086412	CG4199	0.177873032823631	0.2173993471563773
78	Atf6_+_+_(180r)	Atf6_+_+_(220g)	chrX:2051359-2051859	CG4199	0.1323458445749108	0.2173993471563773
79	Atf6_+_+_(180r)	Atf6_+_+_(220g)	chr3L:5543539-5544039	bc10	0.06834464702383145	0.1387638514016961
80	Atf6_+_+_(180r)	Atf6_+_+_(220g)	chr3L:11632882-11633382	CG32091	0.18113771285479846	0.1312945697713235
81	Atf6_+_+_(180r)	Atf6_+_+_(220g)	chr2R:22303918-22304418	wdp	0.1311069871159828	0.1758988935968348
82	Atf6_+_+_(180r)	Atf6_+_+_(220g)	chr2R:22301256-22301756	wdp	0.12955504631029746	0.1758988935968348
83	Atf6_+_+_(180r)	Atf6_+_+_(220g)	chrX:4136436-4136936	Nsun2	0.07969247139322727	0.1530422609212684
84	Atf6_+_+_(180r)	Atf6_+_+_(220g)	chrX:4111266-4111766	Nsun2	0.06514561149393959	0.1530422609212684
85	Atf6_+_+_(180r)	Atf6_+_+_(220g)	chrX:14867021-14867521	CG14408	0.06583545345541085	0.0698857146415557
86	Atf6_+_+_(180r)	Atf6_+_+_(220g)	chr3R:4737876-4738376	tacc	0.1024404417299376	0.2500907086971484
87	Atf6_+_+_(180r)	Atf6_+_+_(220g)	chr3L:2142934-2143434	sls	0.04095030489111668	0.1257336106843933
88	Atf6_+_+_(180r)	Atf6_+_+_(220g)	chr2R:24751337-24751837	Usp15-31	0.04918106747410037	0.0991913299991475
89	Atf6_+_+_(180r)	Atf6_+_+_(220g)	chr2L:12719264-12719764	Pih1D1	0.049128339103028634	0.2526185339050273
90	Atf6_+_+_(180r)	Atf6_+_+_(220g)	chrX:12467550-12468050	CG42258	0.06920077568168248	0.1655530340255473
91	Atf6_+_+_(180r)	Atf6_+_+_(220g)	chrX:12473880-12474380	CG42258	0.04273246373623825	0.1655530340255473
92	Atf6_+_+_(180r)	Atf6_+_+_(220g)	chr2L:10690855-10691355	CG7294	0.20553949048087025	0.0872255945986249
93	Atf6_+_+_(180r)	Atf6_+_+_(220g)	chr2L:10686951-10687451	CG7294	0.1794293913941331	0.0872255945986249
94	Atf6_+_+_(180r)	Atf6_+_+_(220g)	chr2L:20704892-20705392	Ns4	0.03579815755713443	0.1202488012576557
95	Atf6_+_+_(180r)	Atf6_+_+_(220g)	chr2L:20798967-20799467	Ns4	0.04017511563729513	0.1202488012576557
96	Atf6_+_+_(180r)	Atf6_+_+_(220g)	chr2R:10733585-10734085	stan	0.061036342103431125	0.1682156401423425
97	Atf6_+_+_(180r)	Atf6_+_+_(220g)	chr2L:16885311-16885811	CG12288	0.03518333767536263	0.1524949871343375
98	Atf6_+_+_(180r)	Atf6_+_+_(220g)	chr2R:12438675-12439175	Dera	0.03752526845221026	0.1433055295865087
99	Atf6_+_+_(180r)	Atf6_+_+_(220g)	chr3R:16416345-16416845	CG17565	0.047882098596024894	0.1193641547971454
100	Atf6_+_+_(180r)	Atf6_+_+_(220g)	chr3R:21848395-21848895	CG6656	0.03052867193893936	0.1008415996987982
101	Atf6_+_+_(180r)	Atf6_+_+_(220g)	chr2L:12645849-12646349	pdm2	0.3129664545134389	0.1033566296548484
102	Atf6_+_+_(180r)	Atf6_+_+_(220g)	chrX:17596308-17596808	X11L	0.031011501324692034	0.129883002046938
103	Atf6_+_+_(180r)	Atf6_+_+_(220g)	chr2R:6870000-6870500	Spn42Da	0.061248848971272404	0.1648546850271491
104	Atf6_+_+_(180r)	Atf6_+_+_(220g)	chr3R:4737876-4738376	ctrip	0.05291125974401575	0.2536691267939346
105	Atf6_+_+_(180r)	Atf6_+_+_(220g)	chr2L:20858858-20859358	CG9336	0.3857862873398609	0.1181443940396984
106	Atf6_+_+_(180r)	Atf6_+_+_(220g)	chr2L:20859718-20860218	CG9336	0.3937800968248864	0.1181443940396984
107	Atf6_+_+_(180r)	Atf6_+_+_(220g)	chr2L:20907304-20907804	CG9336	0.30076342057729233	0.1181443940396984
108	Atf6_+_+_(180r)	Atf6_+_+_(220g)	chr2L:20880348-20880848	CG9336	0.23191116560773775	0.1181443940396984
109	Atf6_+_+_(180r)	Atf6_+_+_(220g)	chrX:9076388-9076888	CG15365	0.06065215752946358	0.1661096075529099
110	Atf6_+_+_(180r)	Atf6_+_+_(220g)	chrX:9075646-9076146	CG15365	0.08212047681046736	0.1661096075529099
111	Atf6_+_+_(180r)	Atf6_+_+_(220g)	chr2R:7766190-7766690	puml	0.05618770081267425	0.1125199065583518
112	Atf6_+_+_(180r)	Atf6_+_+_(220g)	chr2R:19233759-19234259	cora	0.047520332983520194	0.2775594855809537
113	Atf6_+_+_(180r)	Atf6_+_+_(220g)	chr2R:11657748-11658248	CG9005	0.036009215260428884	0.2277572261988101
114	Atf6_+_+_(180r)	Atf6_+_+_(220g)	chr2L:1193455-1193955	Tfb4	0.03347435272188175	0.1167280370131093
115	Atf6_+_+_(180r)	Atf6_+_+_(220g)	chr2L:7869383-7869883	CG7115	0.07115279195379055	0.1654513999611023
116	Atf6_+_+_(180r)	Atf6_+_+_(220g)	chr2L:7868157-7868657	CG7115	0.056288717213184104	0.1654513999611023
117	Atf6_+_+_(180r)	Atf6_+_+_(220g)	chr3L:20538407-20538907	Rcd2	0.1519630308463524	0.0909879456023204
118	Atf6_+_+_(180r)	Atf6_+_+_(220g)	chr2R:19418794-19419294	par-1	0.09146379312689595	0.3402469387112455
119	Atf6_+_+_(180r)	Atf6_+_+_(220g)	chr2R:19421837-19422337	par-1	0.12228788316816847	0.3402469387112455
120	Atf6_+_+_(180r)	Atf6_+_+_(220g)	chr2R:18125868-18126368	Spn55B	0.07181327850382273	0.1106704018924639
121	Atf6_+_+_(180r)	Atf6_+_+_(220g)	chr3L:15225335-15225835	Tollo	0.10354151493683737	0.2476628227675675
122	Atf6_+_+_(180r)	Atf6_+_+_(220g)	chr2L:10690855-10691355	CG6729	0.03975681603288346	0.0869008851586558
123	Atf6_+_+_(180r)	Atf6_+_+_(220g)	chr2L:7361417-7361917	wg	0.2444076702394872	0.1373253429461634
124	Atf6_+_+_(180r)	Atf6_+_+_(220g)	chr3R:21848395-21848895	CASK	0.03688285539793593	0.2151897012417305
125	Atf6_+_+_(180r)	Atf6_+_+_(220g)	chr2L:1122457-1122957	CG14341	0.04758443060611503	0.0783823351732625
126	Atf6_+_+_(180r)	Atf6_+_+_(220g)	chr2L:19537138-19537638	CG10268	0.03245922581070289	0.0916990125853957
127	Atf6_+_+_(180r)	Atf6_+_+_(220g)	chr2L:8164485-8164985	CG8668	0.03360781955921973	0.2012326889619975
128	Atf6_+_+_(180r)	Atf6_+_+_(220g)	chr2R:14265362-14265862	CG8547	0.1285008829271367	0.171279026810095
129	Atf6_+_+_(180r)	Atf6_+_+_(220g)	chr2L:18568932-18569432	Pde11	0.03847009188786468	0.1917048319163434
130	Atf6_+_+_(180r)	Atf6_+_+_(220g)	chr2L:11526488-11526988	Dlg5	0.04650446484691521	0.1525464964822819
131	Atf6_+_+_(180r)	Atf6_+_+_(220g)	chr3L:3270537-3271037	Larp4B	0.10894896713653603	0.2793040209206011
132	Atf6_+_+_(180r)	Atf6_+_+_(220g)	chr2R:20581007-20581507	Hil	0.09549652312067036	0.1685164765813848
133	Atf6_+_+_(180r)	Atf6_+_+_(220g)	chr3R:17113714-17114214	cher	0.22344839830671218	0.2354758328614777
134	Atf6_+_+_(180r)	Atf6_+_+_(220g)	chrX:6034153-6034653	raptor	0.05616514464614958	0.1869711604988471
135	Atf6_+_+_(180r)	Atf6_+_+_(220g)	chr2L:12719264-12719764	MRP	0.11842259543551158	0.192108524296657
136	Atf6_+_+_(180r)	Atf6_+_+_(220g)	chr2R:11921207-11921707	MCPH1	0.1327225866501277	0.178992375183013
137	Atf6_+_+_(180r)	Atf6_+_+_(220g)	chrX:11446754-11447254	Drak	0.1378529799639562	0.2865060974937427
138	Atf6_+_+_(180r)	Atf6_+_+_(220g)	chr2R:17371225-17371725	Camp	0.04051245457487696	0.088631406133928
139	Atf6_+_+_(180r)	Atf6_+_+_(220g)	chr2L:11242490-11242990	cana	0.06919304315349356	0.1576958083399217
140	Atf6_+_+_(180r)	Atf6_+_+_(220g)	chr2L:21617185-21617685	Ac3	0.06006311367017408	0.0518520249118441
141	Atf6_+_+_(180r)	Atf6_+_+_(220g)	chr3L:20199098-20199598	CG42674	0.1702525293420915	0.2432504361916928
142	Atf6_+_+_(180r)	Atf6_+_+_(220g)	chr3R:24550967-24551467	REPTOR	0.16282868297365405	0.2142030082269891
143	Atf6_+_+_(180r)	Atf6_+_+_(220g)	chr3R:24549705-24550205	REPTOR	0.12397899844271586	0.2142030082269891
144	Atf6_+_+_(180r)	Atf6_+_+_(220g)	chr3R:21094257-21094757	RhoGAP93B	0.030849834771923882	0.1500320775058002
145	Atf6_+_+_(180r)	Atf6_+_+_(220g)	chr2L:21617185-21617685	Cul2	0.03133202612608856	0.15927445395934
146	Atf6_+_+_(180r)	Atf6_+_+_(220g)	chr3L:1374589-1375089	Myo61F	0.18517951767133756	0.1563328843230082
147	Atf6_+_+_(180r)	Atf6_+_+_(220g)	chr3L:1319853-1320353	Myo61F	0.19687357157850754	0.1563328843230082
148	Atf6_+_+_(180r)	Atf6_+_+_(220g)	chr3L:1353990-1354490	Myo61F	0.13862638923721027	0.1563328843230082
149	Atf6_+_+_(180r)	Atf6_+_+_(220g)	chr3R:32049037-32049537	mod	0.07766020598403223	0.3063827005871085
150	Atf6_+_+_(180r)	Atf6_+_+_(220g)	chr2L:8164485-8164985	Piezo	0.20360354445173837	0.148784129090397
151	Atf6_+_+_(180r)	Atf6_+_+_(220g)	chr2L:8171620-8172120	Piezo	0.1681170804230783	0.148784129090397
152	Atf6_+_+_(180r)	Atf6_+_+_(220g)	chr2R:22120794-22121294	GlcT	0.04097904117401275	0.0797394913676168
153	Atf6_+_+_(180r)	Atf6_+_+_(220g)	chr2R:22102576-22103076	GlcT	0.04924495420638293	0.0797394913676168
154	Atf6_+_+_(180r)	Atf6_+_+_(220g)	chr3L:16699820-16700320	Baldspot	0.04782297631546759	0.1795583779563802
155	Atf6_+_+_(180r)	Atf6_+_+_(220g)	chr2L:19420965-19421465	CG17549	0.1842992157761017	0.1766668718620706
156	Atf6_+_+_(180r)	Atf6_+_+_(220g)	chr2L:19415170-19415670	CG17549	0.15733689851223712	0.1766668718620706
157	Atf6_+_+_(180r)	Atf6_+_+_(220g)	chrX:17596308-17596808	Ankle2	0.04373795394764376	0.1530829783746711
158	Atf6_+_+_(180r)	Atf6_+_+_(220g)	chr2L:7090646-7091146	Pvf3	0.18543543293732542	0.1085522454719018
159	Atf6_+_+_(180r)	Atf6_+_+_(220g)	chr2L:7155312-7155812	Pvf3	0.20358825598688965	0.1085522454719018
160	Atf6_+_+_(180r)	Atf6_+_+_(220g)	chr2L:12054536-12055036	Rab3-GAP	0.03262949526494509	0.056477113698989
161	Atf6_+_+_(180r)	Atf6_+_+_(220g)	chr3L:7325574-7326074	SMSr	0.043253113875829106	0.1509978096445138
162	Atf6_+_+_(180r)	Atf6_+_+_(220g)	chrX:1511985-1512485	Rab27	0.06182265125287743	0.1378732270658729
163	Atf6_+_+_(180r)	Atf6_+_+_(220g)	chrX:16719534-16720034	Axs	0.08896995717794404	0.1395583122026687
164	Atf6_+_+_(180r)	Atf6_+_+_(220g)	chr2L:16618568-16619068	CG31815	0.06103214430693469	0.0693290821651574
165	Atf6_+_+_(180r)	Atf6_+_+_(220g)	chr2R:17084779-17085279	RhoGEF2	0.09925815558961136	0.2465537608406194
166	Atf6_+_+_(180r)	Atf6_+_+_(220g)	chr2L:19537138-19537638	CG10337	0.06717825591088705	0.0936364538210628
167	Atf6_+_+_(180r)	Atf6_+_+_(220g)	chr2L:19420965-19421465	CG17544	0.05278168934484358	0.1504024700688163
168	Atf6_+_+_(180r)	Atf6_+_+_(220g)	chr2L:16529370-16529870	CG5953	0.2476089806751428	0.1068908671526259
169	Atf6_+_+_(180r)	Atf6_+_+_(220g)	chr3R:26982754-26983254	CG46339	0.30400315515330556	0.2125624345065762
170	Atf6_+_+_(180r)	Atf6_+_+_(220g)	chr3R:26953005-26953505	CG46339	0.2843116615137825	0.2125624345065762
171	Atf6_+_+_(180r)	Atf6_+_+_(220g)	chr3R:26926905-26927405	CG46339	0.27899715469515	0.2125624345065762
172	Atf6_+_+_(180r)	Atf6_+_+_(220g)	chr2R:22102576-22103076	Vrp1	0.16065327560209677	0.1305257169814491
173	Atf6_+_+_(180r)	Atf6_+_+_(220g)	chr2R:22116240-22116740	Vrp1	0.14712854265575975	0.1305257169814491
174	Atf6_+_+_(180r)	Atf6_+_+_(220g)	chr2R:22120794-22121294	Vrp1	0.16302538347127038	0.1305257169814491
175	Atf6_+_+_(180r)	Atf6_+_+_(220g)	chrX:13219053-13219553	Coq5	0.036257414751008535	0.0865499155497424
176	Atf6_+_+_(180r)	Atf6_+_+_(220g)	chr2L:16618568-16619068	mtgo	0.2218243084295217	0.2883616468539735
177	Atf6_+_+_(180r)	Atf6_+_+_(220g)	chr3L:3270537-3271037	nSMase	0.06047357221829476	0.1618344726516022
178	Atf6_+_+_(180r)	Atf6_+_+_(220g)	chr2L:10690855-10691355	CG17104	0.060367684715600486	0.1022024608168712
179	Atf6_+_+_(180r)	Atf6_+_+_(220g)	chr2R:11921207-11921707	CG13185	0.05830174621154617	0.217387210741217
180	Atf6_+_+_(180r)	Atf6_+_+_(220g)	chr2L:2802248-2802748	Snx21	0.05584451241249457	0.1053485392473675
181	Atf6_+_+_(180r)	Atf6_+_+_(220g)	chr2L:12645849-12646349	IFT43	0.0357485084856994	0.0827353822826236
182	Atf6_+_+_(180r)	Atf6_+_+_(220g)	chr2R:20581007-20581507	CG11180	0.09378380708289821	0.2199086990337349
183	Atf6_+_+_(180r)	Atf6_+_+_(220g)	chr2L:20704892-20705392	CG2617	0.03957670273913276	0.1283301347131764
184	Atf6_+_+_(180r)	Atf6_+_+_(220g)	chr3R:19665715-19666215	CG6195	0.030057223589419785	0.1905621133680546
185	Atf6_+_+_(180r)	Atf6_+_+_(220g)	chrX:17880354-17880854	CG7772	0.03246753495484039	0.0812615431093127
186	Atf6_+_+_(180r)	Atf6_+_+_(220g)	chr2L:16885311-16885811	tweek	0.03354144853899455	0.1463413017900102
187	Atf6_+_+_(180r)	Atf6_+_+_(220g)	chr3L:17050246-17050746	scaf6	0.07668934283054882	0.2571651907243217
188	Atf6_+_+_(180r)	Atf6_+_+_(220g)	chr2L:5285692-5286192	vri	0.0976290966657844	0.1278967386236638
189	Atf6_+_+_(180r)	Atf6_+_+_(220g)	chr2L:13269135-13269635	CG44085	0.39214116930520965	0.1230208816419162
190	Atf6_+_+_(180r)	Atf6_+_+_(220g)	chr3L:17031114-17031614	Ilp8	0.3703382652921606	0.1048040830959449
191	Atf6_+_+_(180r)	Atf6_+_+_(220g)	chr3L:22711361-22711861	CG11370	0.03634163588801324	0.0427035003360373
192	Atf6_+_+_(180r)	Atf6_+_+_(220g)	chr3R:24549705-24550205	Esyt2	0.24461949518231552	0.1027253894195842
193	Atf6_+_+_(180r)	Atf6_+_+_(220g)	chr3R:24550967-24551467	Esyt2	0.24231850127536303	0.1027253894195842
194	Atf6_+_+_(180r)	Atf6_+_+_(220g)	chr3R:27593191-27593691	CG5639	0.14681103824950725	0.0776998961166508
195	Atf6_+_+_(180r)	Atf6_+_+_(220g)	chr3R:27556851-27557351	CG5639	0.03932896269545484	0.0776998961166508
196	Atf6_+_+_(180r)	Atf6_+_+_(220g)	chr3R:28905930-28906430	spg	0.03304670509636803	0.0998342836486461
197	Atf6_+_+_(180r)	Atf6_+_+_(220g)	chr2R:13583456-13583956	CG6145	0.11315482974846963	0.1217087620345133
198	Atf6_+_+_(180r)	Atf6_+_+_(220g)	chr2L:20807850-20808350	dia	0.15395231768633824	0.1875343849275509
199	Atf6_+_+_(180r)	Atf6_+_+_(220g)	chrX:12467550-12468050	Rab40	0.030036926091433547	0.1707574214883998
200	Atf6_+_+_(180r)	Atf6_+_+_(220g)	chr3L:217645-218145	CG33229	0.14735677556201118	0.2649967847617064
201	Atf6_+_+_(180r)	Atf6_+_+_(220g)	chr3R:31411704-31412204	Gprk2	0.13361041596425974	0.2341134586715873
202	Atf6_+_+_(180r)	Atf6_+_+_(220g)	chr2L:1193455-1193955	l(2)10685	0.033855835230250424	0.0550064805691329
203	Atf6_+_+_(180r)	Atf6_+_+_(220g)	chr3R:27556851-27557351	Klp98A	0.1475756037469879	0.1644770351524183
204	Atf6_+_+_(180r)	Atf6_+_+_(220g)	chrX:18278904-18279404	upd1	0.2711162434960424	0.109444276252751
205	Atf6_+_+_(180r)	Atf6_+_+_(220g)	chrX:17422661-17423161	CG8611	0.044801087731839544	0.1302976134553198
206	Atf6_+_+_(180r)	Atf6_+_+_(220g)	chr2L:11526488-11526988	spz4	0.04933919955276781	0.0462216172418804
207	Atf6_+_+_(180r)	Atf6_+_+_(220g)	chr2R:19421837-19422337	CG9416	0.038283336450690285	0.1116285072669399
208	Atf6_+_+_(180r)	Atf6_+_+_(220g)	chr2L:8720962-8721462	PrBP	0.03733408706591708	0.14241277630092
209	Atf6_+_+_(180r)	Atf6_+_+_(220g)	chrX:2539638-2540138	trol	0.3835447536928061	0.1097701310098393
210	Atf6_+_+_(180r)	Atf6_+_+_(220g)	chrX:13219053-13219553	mew	0.1005926988399966	0.2535220325124041
211	Atf6_+_+_(180r)	Atf6_+_+_(220g)	chrX:5725607-5726107	CG42699	0.03578015940535372	0.1058792064606243
212	Atf6_+_+_(180r)	Atf6_+_+_(220g)	chr3R:19665715-19666215	Naam	0.03700413694772048	0.1237212553393247
213	Atf6_+_+_(180r)	Atf6_+_+_(220g)	chr3R:19632557-19633057	Naam	0.03233341737327732	0.1237212553393247
214	Atf6_+_+_(180r)	Atf6_+_+_(220g)	chrX:4111266-4111766	tyf	0.06260868747970198	0.2951212789239171
215	Atf6_+_+_(180r)	Atf6_+_+_(220g)	chrX:4136436-4136936	tyf	0.09829664572515545	0.2951212789239171
216	Atf6_+_+_(180r)	Atf6_+_+_(220g)	chr2R:7049430-7049930	Tsp42El	0.19493645317329986	0.0810556118620997
217	Atf6_+_+_(180r)	Atf6_+_+_(220g)	chr2R:19171337-19171837	CG15118	0.030147826123817816	0.1452501835870293
218	Atf6_+_+_(180r)	Atf6_+_+_(220g)	chr2L:18568932-18569432	MESR3	0.08151230748730295	0.1212463103525239
219	Atf6_+_+_(180r)	Atf6_+_+_(220g)	chr2R:24996452-24996952	zip	0.26351303837654483	0.2863010088870774
220	Atf6_+_+_(180r)	Atf6_+_+_(220g)	chr3R:12716396-12716896	mbo	0.04019398240722152	0.1507688901866156
221	Atf6_+_+_(180r)	Atf6_+_+_(220g)	chrX:6649277-6649777	pigs	0.3471015594836729	0.2010117897053637
222	Atf6_+_+_(180r)	Atf6_+_+_(220g)	chr3R:19632557-19633057	subdued	0.12292869901801191	0.1176263540123744
223	Atf6_+_+_(180r)	Atf6_+_+_(220g)	chr2L:1194672-1195172	CG5001	0.11005588514459355	0.1481716517105368
224	Atf6_+_+_(180r)	Atf6_+_+_(220g)	chr2L:1193455-1193955	CG5001	0.09089663649486661	0.1481716517105368
225	Atf6_+_+_(180r)	Atf6_+_+_(220g)	chr2R:22102576-22103076	Synj	0.0385356942530979	0.0838402733232714
226	Atf6_+_+_(180r)	Atf6_+_+_(220g)	chr2L:8085580-8086080	Bsg	0.10386073078260054	0.3423351495089404
227	Atf6_+_+_(180r)	Atf6_+_+_(220g)	chr2R:24587581-24588081	CG11414	0.05913814125153231	0.1432635585737435
228	Atf6_+_+_(180r)	Atf6_+_+_(220g)	chr2L:7492943-7493443	CG5973	0.05133071377035114	0.110177684016744
229	Atf6_+_+_(180r)	Atf6_+_+_(220g)	chr2L:16857766-16858266	CG31809	0.031114955276379152	0.0436367168526931
230	Atf6_+_+_(180r)	Atf6_+_+_(220g)	chr2L:16885311-16885811	CG31809	0.032572195098709636	0.0436367168526931
231	Atf6_+_+_(180r)	Atf6_+_+_(220g)	chrX:5725607-5726107	Snx27	0.11430693050103327	0.1654775388022425
232	Atf6_+_+_(180r)	Atf6_+_+_(220g)	chr2R:7270927-7271427	Dscam1	0.030541472550705245	0.1289219455080127
233	Atf6_+_+_(180r)	Atf6_+_+_(220g)	chr2L:6546779-6547279	eya	0.13180773558588962	0.0466659667468674
234	Atf6_+_+_(180r)	Atf6_+_+_(220g)	chr3R:30152061-30152561	CG31028	0.04517752915338871	0.1405927563308033
235	Atf6_+_+_(180r)	Atf6_+_+_(220g)	chr3L:16895367-16895867	Lmpt	0.17777121487416972	0.2424052092648631
236	Atf6_+_+_(180r)	Atf6_+_+_(220g)	chr2R:9812981-9813481	CG1671	0.030284085457686214	0.1314504157683755
237	Atf6_+_+_(180r)	Atf6_+_+_(220g)	chr3L:13946013-13946513	Meics	0.03424386108135276	0.1176085216060063
238	Atf6_+_+_(180r)	Atf6_+_+_(220g)	chr2L:8164485-8164985	CG8353	0.030793449321199286	0.0604866396905874
239	Atf6_+_+_(180r)	Atf6_+_+_(220g)	chr3R:13742187-13742687	kmr	0.18883448446364878	0.305458485452616
240	Atf6_+_+_(180r)	Atf6_+_+_(220g)	chrX:2085912-2086412	CG4313	0.03253580063184659	0.0785294699609933
241	Atf6_+_+_(180r)	Atf6_+_+_(220g)	chr2R:15235676-15236176	Fs	0.24592993041455352	0.1333067113708232
242	Atf6_+_+_(180r)	Atf6_+_+_(220g)	chrX:13406251-13406751	GstT4	0.08783512222615923	0.104864125766901
243	Atf6_+_+_(180r)	Atf6_+_+_(220g)	chrX:16176717-16177217	disco	0.030983924359881822	0.0588479357500056
244	Atf6_+_+_(180r)	Atf6_+_+_(220g)	chr2R:6023547-6024047	SCAP	0.09740664112727847	0.2512145438568355
245	Atf6_+_+_(180r)	Atf6_+_+_(220g)	chr2L:22541369-22541869	Slmap	0.03609339676355082	0.1987125503704238
246	Atf6_+_+_(180r)	Atf6_+_+_(220g)	chr2R:14482778-14483278	CG30197	0.04486457927393028	0.0880603684338537
247	Atf6_+_+_(180r)	Atf6_+_+_(220g)	chr2R:6090627-6091127	EcR	0.18429759373511484	0.3207123991547541
248	Atf6_+_+_(180r)	Atf6_+_+_(220g)	chrX:8418617-8419117	PIG-T	0.032330829478528465	0.2573303370882953
249	Atf6_+_+_(180r)	Atf6_+_+_(220g)	chr2L:19207740-19208240	drl	0.3832299366571185	0.2100776049015698
250	Atf6_+_+_(180r)	Atf6_+_+_(220g)	chr2R:24593706-24594206	Adck1	0.03222997016822922	0.0930043823536209
251	Atf6_+_+_(180r)	Atf6_+_+_(220g)	chr3L:18102201-18102701	Rpc53	0.0430566769258906	0.1302243354150599
252	Atf6_+_+_(180r)	Atf6_+_+_(220g)	chr2R:22649538-22650038	CG34445	0.05390148275098409	0.0318000900041653
253	Atf6_+_+_(180r)	Atf6_+_+_(220g)	chr2L:19120548-19121048	amd	0.03941243584530043	0.1123825805361617
254	Atf6_+_+_(180r)	Atf6_+_+_(220g)	chr2R:6681855-6682355	Tdc2	0.18305416913506023	0.0689878790821633
255	Atf6_+_+_(180r)	Atf6_+_+_(220g)	chrX:21306518-21307018	ABCA	0.06261194267273114	0.0683961042901751
256	Atf6_+_+_(180r)	Atf6_+_+_(220g)	chr3R:27593191-27593691	wdb	0.0993906899753742	0.3336247428221457
257	Atf6_+_+_(180r)	Atf6_+_+_(220g)	chr3R:27556851-27557351	wdb	0.0707280486315596	0.3336247428221457
258	Atf6_+_+_(180r)	Atf6_+_+_(220g)	chr2R:14576877-14577377	CG12868	0.031483465435094726	0.0820705973389228
259	Atf6_+_+_(180r)	Atf6_+_+_(220g)	chr2R:20581007-20581507	Mgat1	0.032818380652472605	0.1059631803742783
260	Atf6_+_+_(180r)	Atf6_+_+_(220g)	chr3L:17403574-17404074	Cad74A	0.049511052467659994	0.1986223516264096
261	Atf6_+_+_(180r)	Atf6_+_+_(220g)	chr2L:16818471-16818971	AspRS-m	0.0393160031158444	0.1620206012851531
262	Atf6_+_+_(180r)	Atf6_+_+_(220g)	chr3R:21848395-21848895	glec	0.0595142426607016	0.1663584830285857
263	Atf6_+_+_(180r)	Atf6_+_+_(220g)	chrX:6539076-6539576	dx	0.05553662883196161	0.1317196702239782
264	Atf6_+_+_(180r)	Atf6_+_+_(220g)	chr2L:16355678-16356178	CG4278	0.03587290020345575	0.1518877374384097
0	Awh_+_+_(39r)	Awh_+_+_(27g)	chr3L:5946818-5947318	CG33993	0.16707235952337895	0.1314500033059993
1	Awh_+_+_(39r)	Awh_+_+_(27g)	chr3L:5942805-5943305	CG33993	0.1100648420311045	0.1314500033059993
2	Awh_+_+_(39r)	Awh_+_+_(27g)	chr3L:5949765-5950265	CG33993	0.13551329555686642	0.1314500033059993
3	Awh_+_+_(39r)	Awh_+_+_(27g)	chr3L:5957530-5958030	CG33993	0.12071263100907917	0.1314500033059993
4	Awh_+_+_(39r)	Awh_+_+_(27g)	chr3R:12226855-12227355	svp	0.17100022751655697	0.3035517434850449
5	Awh_+_+_(39r)	Awh_+_+_(27g)	chr3R:12230261-12230761	svp	0.14264991833273652	0.3035517434850449
6	Awh_+_+_(39r)	Awh_+_+_(27g)	chr3R:18075776-18076276	sr	0.16128263373120708	0.0966022721631633
7	Awh_+_+_(39r)	Awh_+_+_(27g)	chr3R:18099585-18100085	sr	0.12247569054387493	0.0966022721631633
8	Awh_+_+_(39r)	Awh_+_+_(27g)	chr3R:18067289-18067789	sr	0.1712364703399048	0.0966022721631633
9	Awh_+_+_(39r)	Awh_+_+_(27g)	chr2R:9062736-9063236	ana	0.17391250310969406	0.0471373971810576
10	Awh_+_+_(39r)	Awh_+_+_(27g)	chr2R:9067727-9068227	ana	0.14548476453241524	0.0471373971810576
11	Awh_+_+_(39r)	Awh_+_+_(27g)	chr2L:6181514-6182014	smal	0.2556294372955985	0.1919035680859543
12	Awh_+_+_(39r)	Awh_+_+_(27g)	chr2L:6198411-6198911	smal	0.2776490977672914	0.1919035680859543
13	Awh_+_+_(39r)	Awh_+_+_(27g)	chr3L:12625002-12625502	ara	0.3397643045057584	0.1914128191255708
14	Awh_+_+_(39r)	Awh_+_+_(27g)	chr3L:12619295-12619795	ara	0.3504669139229616	0.1914128191255708
15	Awh_+_+_(39r)	Awh_+_+_(27g)	chr3L:8716240-8716740	h	0.10568423423816423	0.1293871465883605
16	Awh_+_+_(39r)	Awh_+_+_(27g)	chr3L:8669425-8669925	h	0.0570030710257945	0.1293871465883605
17	Awh_+_+_(39r)	Awh_+_+_(27g)	chr3L:12643143-12643643	caup	0.4158648638195733	0.2053900282947612
18	Awh_+_+_(39r)	Awh_+_+_(27g)	chr3L:12619295-12619795	caup	0.4352007997183536	0.2053900282947612
19	Awh_+_+_(39r)	Awh_+_+_(27g)	chr2R:21908633-21909133	Fili	0.2600283206375809	0.0838452801501635
20	Awh_+_+_(39r)	Awh_+_+_(27g)	chr2L:8919267-8919767	CG34398	0.23385007982934292	0.1070565563769243
21	Awh_+_+_(39r)	Awh_+_+_(27g)	chr3L:4493502-4494002	CG13722	0.036567845616193057	0.1252019713007581
22	Awh_+_+_(39r)	Awh_+_+_(27g)	chr2R:13286045-13286545	Dh31-R	0.2308056133508137	0.0955152331423936
23	Awh_+_+_(39r)	Awh_+_+_(27g)	chr2R:21375908-21376408	cv-2	0.1781981632498365	0.1628233631672057
24	Awh_+_+_(39r)	Awh_+_+_(27g)	chr2R:16835341-16835841	IntS8	0.03369264670932662	0.0555125231467824
25	Awh_+_+_(39r)	Awh_+_+_(27g)	chr3R:27207519-27208019	Ser	0.43320105923934116	0.1650651306444421
26	Awh_+_+_(39r)	Awh_+_+_(27g)	chrX:3392471-3392971	Myc	0.21716089944571737	0.1248223274670518
27	Awh_+_+_(39r)	Awh_+_+_(27g)	chr3R:19811752-19812252	bnl	0.17411071509072848	0.4148337867747597
28	Awh_+_+_(39r)	Awh_+_+_(27g)	chr3R:12226855-12227355	CG17738	0.07190461949941174	0.1549769928797652
29	Awh_+_+_(39r)	Awh_+_+_(27g)	chr3R:12230261-12230761	CG17738	0.057320564410436925	0.1549769928797652
30	Awh_+_+_(39r)	Awh_+_+_(27g)	chr3R:19120177-19120677	CG6040	0.14990658310350716	0.1949034540461381
31	Awh_+_+_(39r)	Awh_+_+_(27g)	chr3R:20960883-20961383	Atpalpha	0.10818207655580636	0.1408739781487
32	Awh_+_+_(39r)	Awh_+_+_(27g)	chr3L:3382929-3383429	sty	0.07213470240792763	0.1081007463202163
33	Awh_+_+_(39r)	Awh_+_+_(27g)	chr3L:15761278-15761778	comm	0.03710717645724435	0.0849162117119644
34	Awh_+_+_(39r)	Awh_+_+_(27g)	chr3R:24963963-24964463	tnc	0.20962823677958276	0.0823547071877149
35	Awh_+_+_(39r)	Awh_+_+_(27g)	chrX:18557582-18558082	Bx	0.3311557314276139	0.0918627179128466
36	Awh_+_+_(39r)	Awh_+_+_(27g)	chrX:18541190-18541690	Bx	0.4032909265141256	0.0918627179128466
37	Awh_+_+_(39r)	Awh_+_+_(27g)	chrX:18545674-18546174	Bx	0.4295954108171198	0.0918627179128466
38	Awh_+_+_(39r)	Awh_+_+_(27g)	chrX:18544053-18544553	Bx	0.37294888768220896	0.0918627179128466
39	Awh_+_+_(39r)	Awh_+_+_(27g)	chr2R:9498428-9498928	CG1888	0.07375199941531435	0.0509633051817346
40	Awh_+_+_(39r)	Awh_+_+_(27g)	chr2L:19454852-19455352	RtcB	0.08570036757093945	0.0653043911795042
41	Awh_+_+_(39r)	Awh_+_+_(27g)	chr3L:16285883-16286383	CG13064	0.03542061868693433	0.0665020879660564
0	B-H1_+_+_(28r)	B-H1_+_+_(18g)	chrX:3040077-3040577	kirre	0.2791058516561491	0.0355457330156292
1	B-H1_+_+_(28r)	B-H1_+_+_(18g)	chrX:2955621-2956121	kirre	0.2962641167251787	0.0355457330156292
2	B-H1_+_+_(28r)	B-H1_+_+_(18g)	chrX:5301169-5301669	CG42749	0.10904682440360862	0.0673156249561963
3	B-H1_+_+_(28r)	B-H1_+_+_(18g)	chr2R:13577472-13577972	CG42808	0.03257735890736023	0.0488741786858433
4	B-H1_+_+_(28r)	B-H1_+_+_(18g)	chr2R:13591117-13591617	CG42808	0.03445802751444246	0.0488741786858433
5	B-H1_+_+_(28r)	B-H1_+_+_(18g)	chr2R:18272353-18272853	fj	0.37222729331770993	0.0991307098556071
6	B-H1_+_+_(28r)	B-H1_+_+_(18g)	chr2R:18242831-18243331	fj	0.380022923331235	0.0991307098556071
7	B-H1_+_+_(28r)	B-H1_+_+_(18g)	chr2R:18200168-18200668	fj	0.15309183010365604	0.0991307098556071
8	B-H1_+_+_(28r)	B-H1_+_+_(18g)	chr2R:18240747-18241247	fj	0.32740115224353816	0.0991307098556071
9	B-H1_+_+_(28r)	B-H1_+_+_(18g)	chr2R:24839125-24839625	Reg-5	0.08403765342011439	0.0848630228597325
10	B-H1_+_+_(28r)	B-H1_+_+_(18g)	chr2R:24822113-24822613	Reg-5	0.10310439751475726	0.0848630228597325
11	B-H1_+_+_(28r)	B-H1_+_+_(18g)	chr2R:24840962-24841462	Reg-5	0.08699771405899358	0.0848630228597325
12	B-H1_+_+_(28r)	B-H1_+_+_(18g)	chr3R:16023157-16023657	pnr	0.293832241294656	0.1286394884441919
13	B-H1_+_+_(28r)	B-H1_+_+_(18g)	chr3R:16036264-16036764	pnr	0.29420006444717683	0.1286394884441919
14	B-H1_+_+_(28r)	B-H1_+_+_(18g)	chrX:17331970-17332470	B-H2	0.13519855635519806	0.3979232493118721
15	B-H1_+_+_(28r)	B-H1_+_+_(18g)	chrX:17330737-17331237	B-H2	0.1378039170830872	0.3979232493118721
16	B-H1_+_+_(28r)	B-H1_+_+_(18g)	chr3L:17389317-17389817	CG13731	0.1174556521327885	0.051739196154626
17	B-H1_+_+_(28r)	B-H1_+_+_(18g)	chr3R:18067289-18067789	sr	0.1712364703399048	0.1008149937287858
18	B-H1_+_+_(28r)	B-H1_+_+_(18g)	chrX:15070457-15070957	dob	0.04229452728805955	0.0352810497226409
19	B-H1_+_+_(28r)	B-H1_+_+_(18g)	chr3R:10674318-10674818	Skeletor	0.11755531429494749	0.0677808718064068
20	B-H1_+_+_(28r)	B-H1_+_+_(18g)	chr2R:21528743-21529243	TAF1C-like	0.037966394087052525	0.0585081833359449
21	B-H1_+_+_(28r)	B-H1_+_+_(18g)	chr3R:7995808-7996308	ImpE3	0.3252543536404318	0.1216328335742692
22	B-H1_+_+_(28r)	B-H1_+_+_(18g)	chr2L:1379593-1380093	robo2	0.2662691307435448	0.1648277396932974
23	B-H1_+_+_(28r)	B-H1_+_+_(18g)	chr2L:7468304-7468804	CG6055	0.08511064313237722	0.0472155584061914
24	B-H1_+_+_(28r)	B-H1_+_+_(18g)	chrX:783510-784010	CG5273	0.05732790730311365	0.096723842209607
25	B-H1_+_+_(28r)	B-H1_+_+_(18g)	chr3L:7255955-7256455	CG14830	0.05992891293596442	0.1157126721452778
26	B-H1_+_+_(28r)	B-H1_+_+_(18g)	chr3L:6472939-6473439	CG42747	0.09765167207610226	0.0810243447049647
27	B-H1_+_+_(28r)	B-H1_+_+_(18g)	chr3L:6471458-6471958	CG42747	0.11425821275068475	0.0810243447049647
0	B-H2_+_+_(40r)	B-H2_+_+_(31g)	chr2R:24857112-24857612	CG16896	0.03394479358340555	0.0400920337517282
1	B-H2_+_+_(40r)	B-H2_+_+_(31g)	chr2R:13577472-13577972	CG42808	0.03257735890736023	0.0437037471799017
2	B-H2_+_+_(40r)	B-H2_+_+_(31g)	chr2R:13576636-13577136	CG42808	0.03677020327996325	0.0437037471799017
3	B-H2_+_+_(40r)	B-H2_+_+_(31g)	chr2R:13591117-13591617	CG42808	0.03445802751444246	0.0437037471799017
4	B-H2_+_+_(40r)	B-H2_+_+_(31g)	chrX:5301169-5301669	CG42749	0.10904682440360862	0.0679408195944287
5	B-H2_+_+_(40r)	B-H2_+_+_(31g)	chr3R:12230261-12230761	CG4860	0.05819395150921059	0.0656347463663516
6	B-H2_+_+_(40r)	B-H2_+_+_(31g)	chr3L:12464544-12465044	eyg	0.3049742259404354	0.1217215755033191
7	B-H2_+_+_(40r)	B-H2_+_+_(31g)	chr3L:12421924-12422424	eyg	0.34400879691568825	0.1217215755033191
8	B-H2_+_+_(40r)	B-H2_+_+_(31g)	chr3R:16023157-16023657	pnr	0.293832241294656	0.1516781850668183
9	B-H2_+_+_(40r)	B-H2_+_+_(31g)	chr3R:16036264-16036764	pnr	0.29420006444717683	0.1516781850668183
10	B-H2_+_+_(40r)	B-H2_+_+_(31g)	chr3L:11717362-11717862	CG14132	0.10395482714444394	0.0447271921853169
11	B-H2_+_+_(40r)	B-H2_+_+_(31g)	chr2L:3643364-3643864	for	0.06702883852589507	0.0572214017388128
12	B-H2_+_+_(40r)	B-H2_+_+_(31g)	chr2L:4228670-4229170	ft	0.17946156954952056	0.120199459703239
13	B-H2_+_+_(40r)	B-H2_+_+_(31g)	chr3R:18099585-18100085	sr	0.12247569054387493	0.1320455447700511
14	B-H2_+_+_(40r)	B-H2_+_+_(31g)	chr3R:18067289-18067789	sr	0.1712364703399048	0.1320455447700511
15	B-H2_+_+_(40r)	B-H2_+_+_(31g)	chr2L:423605-424105	RpI135	0.04517986518865427	0.0607572323994423
16	B-H2_+_+_(40r)	B-H2_+_+_(31g)	chr2L:382070-382570	RpI135	0.049413725966583256	0.0607572323994423
17	B-H2_+_+_(40r)	B-H2_+_+_(31g)	chr2R:12732968-12733468	Dgkepsilon	0.053256116590944244	0.0642124372284659
18	B-H2_+_+_(40r)	B-H2_+_+_(31g)	chr3L:17389317-17389817	CG13731	0.1174556521327885	0.0403994634779728
19	B-H2_+_+_(40r)	B-H2_+_+_(31g)	chr2R:14518802-14519302	CG30197	0.12432180634434888	0.0885917260624946
20	B-H2_+_+_(40r)	B-H2_+_+_(31g)	chrX:15070457-15070957	dob	0.04229452728805955	0.0394890415025914
21	B-H2_+_+_(40r)	B-H2_+_+_(31g)	chr2R:14518802-14519302	Cpr51A	0.20911452296276292	0.1050312744746936
22	B-H2_+_+_(40r)	B-H2_+_+_(31g)	chr2R:21301419-21301919	CG30392	0.04456019418189378	0.0445553215888925
23	B-H2_+_+_(40r)	B-H2_+_+_(31g)	chrX:14173650-14174150	l(1)G0469	0.05254354235215975	0.0682873960479616
24	B-H2_+_+_(40r)	B-H2_+_+_(31g)	chrX:14174454-14174954	l(1)G0469	0.060564298764979305	0.0682873960479616
25	B-H2_+_+_(40r)	B-H2_+_+_(31g)	chr2L:1066243-1066743	Pino	0.06310926100150482	0.0408074855703417
26	B-H2_+_+_(40r)	B-H2_+_+_(31g)	chr2R:9495523-9496023	CG1888	0.07437403253368806	0.0484462435815072
27	B-H2_+_+_(40r)	B-H2_+_+_(31g)	chr2R:9502514-9503014	CG1888	0.05668983435566479	0.0484462435815072
28	B-H2_+_+_(40r)	B-H2_+_+_(31g)	chr3L:4493502-4494002	CG32241	0.04842166981665798	0.1627956689443262
29	B-H2_+_+_(40r)	B-H2_+_+_(31g)	chr3L:4507243-4507743	CG32241	0.07687842457960353	0.1627956689443262
30	B-H2_+_+_(40r)	B-H2_+_+_(31g)	chr3L:5557584-5558084	Eaf6	0.03326579662655398	0.045721554467328
31	B-H2_+_+_(40r)	B-H2_+_+_(31g)	chr2L:1379593-1380093	robo2	0.2662691307435448	0.1858947246344935
32	B-H2_+_+_(40r)	B-H2_+_+_(31g)	chrX:783510-784010	CG5273	0.05732790730311365	0.0669145636359612
33	B-H2_+_+_(40r)	B-H2_+_+_(31g)	chr2L:18907058-18907558	tup	0.3365281965328547	0.1088395586189471
34	B-H2_+_+_(40r)	B-H2_+_+_(31g)	chr3L:7255955-7256455	CG14830	0.05992891293596442	0.1033740805486813
35	B-H2_+_+_(40r)	B-H2_+_+_(31g)	chr2L:386137-386637	Ent1	0.05961157717246065	0.0507931532945114
36	B-H2_+_+_(40r)	B-H2_+_+_(31g)	chr2L:370799-371299	Ent1	0.053561603465758764	0.0507931532945114
37	B-H2_+_+_(40r)	B-H2_+_+_(31g)	chr2R:7193876-7194376	pk	0.20432596656480334	0.0879378527204498
38	B-H2_+_+_(40r)	B-H2_+_+_(31g)	chr3L:10909990-10910490	Blos4	0.030067506229261503	0.0310506498539216
39	B-H2_+_+_(40r)	B-H2_+_+_(31g)	chr3L:17501819-17502319	UQCR-Q	0.08361903138562075	0.0781665166841496
40	B-H2_+_+_(40r)	B-H2_+_+_(31g)	chr3R:15924068-15924568	Hel89B	0.06346551183612488	0.0553527393149314
41	B-H2_+_+_(40r)	B-H2_+_+_(31g)	chr3R:16023157-16023657	Hel89B	0.04502665794705721	0.0553527393149314
0	BtbVII_+_+_(77r)	BtbVII_+_+_(90g)	chr3L:646687-647187	CG3402	0.03191686033299282	0.1397279884520764
1	BtbVII_+_+_(77r)	BtbVII_+_+_(90g)	chrX:14736361-14736861	NetB	0.1707801221155845	0.0994071135338165
2	BtbVII_+_+_(77r)	BtbVII_+_+_(90g)	chrX:8579839-8580339	CG12065	0.17669586865630474	0.0998079969485698
3	BtbVII_+_+_(77r)	BtbVII_+_+_(90g)	chrX:8576530-8577030	CG12065	0.15376901395161713	0.0998079969485698
4	BtbVII_+_+_(77r)	BtbVII_+_+_(90g)	chr3L:7155105-7155605	form3	0.047535943735437826	0.0998084012594794
5	BtbVII_+_+_(77r)	BtbVII_+_+_(90g)	chrX:2089655-2090155	ph-p	0.049042329705951536	0.1547235848550292
6	BtbVII_+_+_(77r)	BtbVII_+_+_(90g)	chrX:8576530-8577030	Nrg	0.17210492730343593	0.3274735914241209
7	BtbVII_+_+_(77r)	BtbVII_+_+_(90g)	chr3L:4354011-4354511	PMP34	0.03437688748985721	0.098379777427699
8	BtbVII_+_+_(77r)	BtbVII_+_+_(90g)	chr3R:4237677-4238177	Gel	0.03454033025009991	0.0743136812082093
9	BtbVII_+_+_(77r)	BtbVII_+_+_(90g)	chr2R:18668932-18669432	Sik3	0.06325855662991035	0.1754556591257803
10	BtbVII_+_+_(77r)	BtbVII_+_+_(90g)	chr2R:22385032-22385532	mRpS29	0.03788883716990846	0.128585095889979
11	BtbVII_+_+_(77r)	BtbVII_+_+_(90g)	chrX:9111194-9111694	Zpr1	0.030485289965323945	0.0984081643957392
12	BtbVII_+_+_(77r)	BtbVII_+_+_(90g)	chr2R:15952254-15952754	Strn-Mlck	0.041480648662912116	0.0575880590030467
13	BtbVII_+_+_(77r)	BtbVII_+_+_(90g)	chr3R:7976509-7977009	CG2698	0.05458237087550414	0.147691371955335
14	BtbVII_+_+_(77r)	BtbVII_+_+_(90g)	chr2R:9679724-9680224	Mmp2	0.20155323632656588	0.0988210394272947
15	BtbVII_+_+_(77r)	BtbVII_+_+_(90g)	chr2R:9680497-9680997	Mmp2	0.2240517474034016	0.0988210394272947
16	BtbVII_+_+_(77r)	BtbVII_+_+_(90g)	chrX:15613680-15614180	sog	0.030700775294600417	0.160483558607152
17	BtbVII_+_+_(77r)	BtbVII_+_+_(90g)	chr3R:23734460-23734960	PTPMT1	0.032750752398984326	0.0963233789251854
18	BtbVII_+_+_(77r)	BtbVII_+_+_(90g)	chr2R:23908417-23908917	CG3803	0.03011639053395157	0.0708886219184607
19	BtbVII_+_+_(77r)	BtbVII_+_+_(90g)	chr2R:14518268-14518768	Cpr51A	0.20324751890638934	0.12943563370833
20	BtbVII_+_+_(77r)	BtbVII_+_+_(90g)	chr2L:19036348-19036848	l(2)37Bb	0.03614402020838769	0.0727908222533437
21	BtbVII_+_+_(77r)	BtbVII_+_+_(90g)	chr2L:4373036-4373536	CG3652	0.034866175936102105	0.147200656318829
22	BtbVII_+_+_(77r)	BtbVII_+_+_(90g)	chr2L:4373036-4373536	Atet	0.04555419038538578	0.0697398573090029
23	BtbVII_+_+_(77r)	BtbVII_+_+_(90g)	chrX:6729082-6729582	CG3168	0.14463378330303317	0.0627003610711869
24	BtbVII_+_+_(77r)	BtbVII_+_+_(90g)	chr3R:19571806-19572306	Dys	0.07848826201144331	0.2600497652424758
25	BtbVII_+_+_(77r)	BtbVII_+_+_(90g)	chr3R:30259982-30260482	hdc	0.10147748320390568	0.3561131510476716
26	BtbVII_+_+_(77r)	BtbVII_+_+_(90g)	chr3R:30300464-30300964	hdc	0.11203219646150259	0.3561131510476716
27	BtbVII_+_+_(77r)	BtbVII_+_+_(90g)	chr2R:15354489-15354989	unc-5	0.12327635666076912	0.1114087193658087
28	BtbVII_+_+_(77r)	BtbVII_+_+_(90g)	chrX:3439745-3440245	CG12206	0.09770678129147167	0.1227923482218893
29	BtbVII_+_+_(77r)	BtbVII_+_+_(90g)	chrX:3468375-3468875	CG12206	0.05283302562111576	0.1227923482218893
30	BtbVII_+_+_(77r)	BtbVII_+_+_(90g)	chrX:6802048-6802548	sov	0.06123037163669982	0.2230206710804533
31	BtbVII_+_+_(77r)	BtbVII_+_+_(90g)	chr3R:23357140-23357640	pnt	0.10409329561117099	0.11247878735546
32	BtbVII_+_+_(77r)	BtbVII_+_+_(90g)	chr3R:23734460-23734960	mbc	0.050633214870587716	0.1166851306459625
33	BtbVII_+_+_(77r)	BtbVII_+_+_(90g)	chrX:3468375-3468875	DIP-alpha	0.08044939135231989	0.3251586899444282
34	BtbVII_+_+_(77r)	BtbVII_+_+_(90g)	chr2R:23053429-23053929	twi	0.14418752349401176	0.0323050267416307
35	BtbVII_+_+_(77r)	BtbVII_+_+_(90g)	chr2R:23048266-23048766	twi	0.1442286268801624	0.0323050267416307
36	BtbVII_+_+_(77r)	BtbVII_+_+_(90g)	chr2R:22940979-22941479	twi	0.1436775576068326	0.0323050267416307
37	BtbVII_+_+_(77r)	BtbVII_+_+_(90g)	chrX:2538476-2538976	CG13760	0.03259311309454663	0.0940865178831592
38	BtbVII_+_+_(77r)	BtbVII_+_+_(90g)	chr3R:21848395-21848895	CG6656	0.03052867193893936	0.0691190423121987
39	BtbVII_+_+_(77r)	BtbVII_+_+_(90g)	chr3R:24555612-24556112	Esyt2	0.04216300387403174	0.0959099439146064
40	BtbVII_+_+_(77r)	BtbVII_+_+_(90g)	chrX:13570160-13570660	Cpr12A	0.04461927998786469	0.0549373903366144
41	BtbVII_+_+_(77r)	BtbVII_+_+_(90g)	chr2R:21697525-21698025	Tango11	0.03610424269988892	0.1392816789742549
42	BtbVII_+_+_(77r)	BtbVII_+_+_(90g)	chrX:6729082-6729582	Coq7	0.03242863194945166	0.1105864711493837
43	BtbVII_+_+_(77r)	BtbVII_+_+_(90g)	chr3L:19072218-19072718	Sfxn2	0.03627061626111394	0.1103842611722333
44	BtbVII_+_+_(77r)	BtbVII_+_+_(90g)	chr3R:23734460-23734960	Hmgcr	0.05098277530547678	0.0879078811597478
45	BtbVII_+_+_(77r)	BtbVII_+_+_(90g)	chrX:15816665-15817165	sd	0.1966353172889112	0.2761784200751659
46	BtbVII_+_+_(77r)	BtbVII_+_+_(90g)	chrX:2543025-2543525	trol	0.3661192580141455	0.1057807084918468
47	BtbVII_+_+_(77r)	BtbVII_+_+_(90g)	chrX:2540565-2541065	trol	0.39734839087296286	0.1057807084918468
48	BtbVII_+_+_(77r)	BtbVII_+_+_(90g)	chrX:2519259-2519759	trol	0.3592346654018547	0.1057807084918468
49	BtbVII_+_+_(77r)	BtbVII_+_+_(90g)	chr3R:21848395-21848895	CASK	0.03688285539793593	0.1917627986811196
50	BtbVII_+_+_(77r)	BtbVII_+_+_(90g)	chr3L:16798019-16798519	CG9674	0.11142263907711808	0.13356909520627
51	BtbVII_+_+_(77r)	BtbVII_+_+_(90g)	chrX:20256309-20256809	CG17065	0.03253463766383096	0.1215998363240623
52	BtbVII_+_+_(77r)	BtbVII_+_+_(90g)	chr3L:9852312-9852812	nudE	0.03219674074003859	0.1841122091576109
53	BtbVII_+_+_(77r)	BtbVII_+_+_(90g)	chrX:12472502-12473002	CG42258	0.05525314459854221	0.1648370404940737
54	BtbVII_+_+_(77r)	BtbVII_+_+_(90g)	chr3L:20199098-20199598	CG42674	0.1702525293420915	0.2193015304465611
55	BtbVII_+_+_(77r)	BtbVII_+_+_(90g)	chrX:14219859-14220359	mud	0.04648944547807848	0.211375673572317
56	BtbVII_+_+_(77r)	BtbVII_+_+_(90g)	chrX:15816665-15817165	CG8578	0.03914083959851894	0.1540099956209755
57	BtbVII_+_+_(77r)	BtbVII_+_+_(90g)	chrX:17113179-17113679	wcy	0.03381639668345094	0.2100275897431061
58	BtbVII_+_+_(77r)	BtbVII_+_+_(90g)	chr2R:9874305-9874805	CG1441	0.03435712419890258	0.040822376305973
59	BtbVII_+_+_(77r)	BtbVII_+_+_(90g)	chrX:15816665-15817165	ArgRS	0.04713637754762654	0.1186788629191531
60	BtbVII_+_+_(77r)	BtbVII_+_+_(90g)	chrX:16763067-16763567	if	0.1649931538982204	0.1010785550127297
61	BtbVII_+_+_(77r)	BtbVII_+_+_(90g)	chrX:17473994-17474494	CG43658	0.3067772246436298	0.1796808769567898
62	BtbVII_+_+_(77r)	BtbVII_+_+_(90g)	chr2R:6517596-6518096	jing	0.033451292166404065	0.2165159033368512
63	BtbVII_+_+_(77r)	BtbVII_+_+_(90g)	chr2L:8091877-8092377	CG8668	0.041104255091773075	0.1736942156072743
64	BtbVII_+_+_(77r)	BtbVII_+_+_(90g)	chr2R:7757965-7758465	CG46385	0.14849847807576383	0.1694729388175583
65	BtbVII_+_+_(77r)	BtbVII_+_+_(90g)	chr3R:26461991-26462491	CG5455	0.06708777182818093	0.0722146656568213
66	BtbVII_+_+_(77r)	BtbVII_+_+_(90g)	chrX:8415071-8415571	CG12123	0.04020338878842234	0.1051049046581598
67	BtbVII_+_+_(77r)	BtbVII_+_+_(90g)	chr2R:6120092-6120592	Ars2	0.03606093553407531	0.2474800104784911
68	BtbVII_+_+_(77r)	BtbVII_+_+_(90g)	chrX:8576530-8577030	Crag	0.046661792143342574	0.1492144428598001
69	BtbVII_+_+_(77r)	BtbVII_+_+_(90g)	chr3R:26900911-26901411	T48	0.10747245523956166	0.1618098362801679
70	BtbVII_+_+_(77r)	BtbVII_+_+_(90g)	chr2R:24132423-24132923	Naa35	0.04158582331483239	0.1166111231946852
71	BtbVII_+_+_(77r)	BtbVII_+_+_(90g)	chrX:15079039-15079539	CG9065	0.04667777807217899	0.1245930662442288
72	BtbVII_+_+_(77r)	BtbVII_+_+_(90g)	chrX:15613680-15614180	CG7860	0.04881727590955532	0.0977375225396524
73	BtbVII_+_+_(77r)	BtbVII_+_+_(90g)	chr3L:646687-647187	RabX6	0.03143197703673892	0.0817438797354245
74	BtbVII_+_+_(77r)	BtbVII_+_+_(90g)	chr3R:9391239-9391739	CG9356	0.030310736694963814	0.0647157506373744
75	BtbVII_+_+_(77r)	BtbVII_+_+_(90g)	chrX:15026570-15027070	be	0.06976656020815049	0.1070299775271398
76	BtbVII_+_+_(77r)	BtbVII_+_+_(90g)	chrX:15044711-15045211	CG5541	0.039202547916994984	0.0621126982911789
77	BtbVII_+_+_(77r)	BtbVII_+_+_(90g)	chrX:9111194-9111694	CG15365	0.08310581705672875	0.1391163166524046
78	BtbVII_+_+_(77r)	BtbVII_+_+_(90g)	chr2R:18835910-18836410	Jheh1	0.09877188468630052	0.0936758699036636
79	BtbVII_+_+_(77r)	BtbVII_+_+_(90g)	chrX:3351472-3351972	dnc	0.0882255507595731	0.1514527078529998
80	BtbVII_+_+_(77r)	BtbVII_+_+_(90g)	chr2L:7626457-7626957	CG6739	0.07632385036541127	0.0900851401345704
81	BtbVII_+_+_(77r)	BtbVII_+_+_(90g)	chr2L:4373036-4373536	Vps53	0.03284794244437017	0.0765235263889272
82	BtbVII_+_+_(77r)	BtbVII_+_+_(90g)	chr3L:7155105-7155605	melt	0.04014181304856374	0.1899482663795527
83	BtbVII_+_+_(77r)	BtbVII_+_+_(90g)	chr2R:22557050-22557550	dnr1	0.04809873050702435	0.0646152542463377
84	BtbVII_+_+_(77r)	BtbVII_+_+_(90g)	chrX:15044711-15045211	CG5599	0.045679638806200795	0.0850267266409653
85	BtbVII_+_+_(77r)	BtbVII_+_+_(90g)	chrX:21279435-21279935	CG1722	0.0407111887701278	0.0362015296659526
86	BtbVII_+_+_(77r)	BtbVII_+_+_(90g)	chr2R:17077108-17077608	CG30460	0.07199986492312287	0.0686109045082927
87	BtbVII_+_+_(77r)	BtbVII_+_+_(90g)	chr2L:14663203-14663703	CG15282	0.04742004030302402	0.0345014209436096
88	BtbVII_+_+_(77r)	BtbVII_+_+_(90g)	chr2R:6120092-6120592	l(2)k09848	0.03464181594589395	0.1431511444001759
89	BtbVII_+_+_(77r)	BtbVII_+_+_(90g)	chr3L:7613114-7613614	Pura	0.10289092526583614	0.1171515065339343
90	BtbVII_+_+_(77r)	BtbVII_+_+_(90g)	chr2R:6023547-6024047	SCAP	0.09740664112727847	0.1998358167473733
91	BtbVII_+_+_(77r)	BtbVII_+_+_(90g)	chr3R:15093732-15094232	CG42788	0.054039829636632654	0.0661134572920153
92	BtbVII_+_+_(77r)	BtbVII_+_+_(90g)	chr2R:18835910-18836410	sano	0.10377209691523404	0.2167190116545627
93	BtbVII_+_+_(77r)	BtbVII_+_+_(90g)	chr2R:18668932-18669432	edl	0.04641460364067199	0.1035180468695394
94	BtbVII_+_+_(77r)	BtbVII_+_+_(90g)	chrX:8576530-8577030	Caf1-180	0.039864531541418245	0.1739660626261592
95	BtbVII_+_+_(77r)	BtbVII_+_+_(90g)	chr2L:22144043-22144543	Clamp	0.03343547142135377	0.1644785072797877
96	BtbVII_+_+_(77r)	BtbVII_+_+_(90g)	chrX:10582204-10582704	X11Lbeta	0.0721065450660122	0.032190519313039
97	BtbVII_+_+_(77r)	BtbVII_+_+_(90g)	chr3L:7155105-7155605	msl-3	0.03665819707972031	0.0642851176192806
0	C15_+_+_(47r)	C15_+_+_(44g)	chr2L:7897636-7898136	CG7102	0.050713678747047485	0.0386280354768568
1	C15_+_+_(47r)	C15_+_+_(44g)	chr3R:12226855-12227355	svp	0.17100022751655697	0.1759843222296988
2	C15_+_+_(47r)	C15_+_+_(44g)	chr2L:10053782-10054282	obst-B	0.03447472226480279	0.1359464703891932
3	C15_+_+_(47r)	C15_+_+_(44g)	chr2L:370799-371299	al	0.168746707688837	0.1130926685390548
4	C15_+_+_(47r)	C15_+_+_(44g)	chr2L:394988-395488	al	0.1444285362720743	0.1130926685390548
5	C15_+_+_(47r)	C15_+_+_(44g)	chr2R:14516830-14517330	CG30197	0.14697246999927205	0.1239101224066469
6	C15_+_+_(47r)	C15_+_+_(44g)	chr2L:2427768-2428268	Atxn7	0.03970528593097099	0.0533582091233506
7	C15_+_+_(47r)	C15_+_+_(44g)	chrX:11998241-11998741	cac	0.03727626551563168	0.0410670751566661
8	C15_+_+_(47r)	C15_+_+_(44g)	chr3R:25459971-25460471	MED28	0.05060338208160577	0.0514492327639565
9	C15_+_+_(47r)	C15_+_+_(44g)	chr3L:8716240-8716740	h	0.10568423423816423	0.1226689114731637
10	C15_+_+_(47r)	C15_+_+_(44g)	chr3L:8669425-8669925	h	0.0570030710257945	0.1226689114731637
11	C15_+_+_(47r)	C15_+_+_(44g)	chr2R:12732968-12733468	mRpL18	0.044555005154370934	0.0379218639429541
12	C15_+_+_(47r)	C15_+_+_(44g)	chr2R:12768689-12769189	mRpL18	0.042280507227498605	0.0379218639429541
13	C15_+_+_(47r)	C15_+_+_(44g)	chr2L:21059261-21059761	l(2)05287	0.04643590441969715	0.0632205948093377
14	C15_+_+_(47r)	C15_+_+_(44g)	chr3L:12421924-12422424	toe	0.34074174305214827	0.1180089222787207
15	C15_+_+_(47r)	C15_+_+_(44g)	chr3L:21688914-21689414	CG32447	0.2267558961559569	0.0997875955842471
16	C15_+_+_(47r)	C15_+_+_(44g)	chr3L:12708880-12709380	mirr	0.3907657230235374	0.1749276540276412
17	C15_+_+_(47r)	C15_+_+_(44g)	chr3L:12643143-12643643	mirr	0.41764761811321255	0.1749276540276412
18	C15_+_+_(47r)	C15_+_+_(44g)	chr3L:4493502-4494002	CG13722	0.036567845616193057	0.065801696283599
19	C15_+_+_(47r)	C15_+_+_(44g)	chr2L:506483-506983	ush	0.1350972130922628	0.1295820673453314
20	C15_+_+_(47r)	C15_+_+_(44g)	chr2R:8645943-8646443	ptc	0.20723856631023166	0.1510736791557396
21	C15_+_+_(47r)	C15_+_+_(44g)	chr2L:10545853-10546353	Trim9	0.2946527417881309	0.0845597239012477
22	C15_+_+_(47r)	C15_+_+_(44g)	chr2R:20162774-20163274	18w	0.16507826755507962	0.2084375895256527
23	C15_+_+_(47r)	C15_+_+_(44g)	chr2R:20088487-20088987	18w	0.16035598503811155	0.2084375895256527
24	C15_+_+_(47r)	C15_+_+_(44g)	chr2R:24241056-24241556	nord	0.1384850645651745	0.0573868222760624
25	C15_+_+_(47r)	C15_+_+_(44g)	chr2R:21301419-21301919	CG30392	0.04456019418189378	0.0415761448938228
26	C15_+_+_(47r)	C15_+_+_(44g)	chr3L:4493502-4494002	NT1	0.1425312754124605	0.0725058875313721
27	C15_+_+_(47r)	C15_+_+_(44g)	chr3L:4507243-4507743	NT1	0.1444529037821021	0.0725058875313721
28	C15_+_+_(47r)	C15_+_+_(44g)	chr3R:16036264-16036764	pnr	0.29420006444717683	0.249120837924513
29	C15_+_+_(47r)	C15_+_+_(44g)	chrX:2955621-2956121	rst	0.32268449933737336	0.0931309384629741
30	C15_+_+_(47r)	C15_+_+_(44g)	chr3L:16889151-16889651	CG11905	0.08745432351146212	0.0686790535677027
31	C15_+_+_(47r)	C15_+_+_(44g)	chr2L:2427768-2428268	PIG-Wa	0.032008374660194225	0.0336400125896848
32	C15_+_+_(47r)	C15_+_+_(44g)	chr2L:1431214-1431714	robo2	0.16678347340874683	0.1574893774722193
33	C15_+_+_(47r)	C15_+_+_(44g)	chr2L:1379593-1380093	robo2	0.2662691307435448	0.1574893774722193
34	C15_+_+_(47r)	C15_+_+_(44g)	chr3L:12421924-12422424	eyg	0.34400879691568825	0.1467107894943593
35	C15_+_+_(47r)	C15_+_+_(44g)	chrX:3392471-3392971	Myc	0.21716089944571737	0.152491262856793
36	C15_+_+_(47r)	C15_+_+_(44g)	chr3L:4493502-4494002	CG32241	0.04842166981665798	0.0845512045878464
37	C15_+_+_(47r)	C15_+_+_(44g)	chr3L:4507243-4507743	CG32241	0.07687842457960353	0.0845512045878464
38	C15_+_+_(47r)	C15_+_+_(44g)	chr2L:2427768-2428268	dpp	0.19754476099161208	0.1277146773470244
39	C15_+_+_(47r)	C15_+_+_(44g)	chr2L:2481418-2481918	dpp	0.16939685207104682	0.1277146773470244
40	C15_+_+_(47r)	C15_+_+_(44g)	chr2R:6939739-6940239	CG3358	0.04836116897053897	0.05228471270026
41	C15_+_+_(47r)	C15_+_+_(44g)	chr2L:8028146-8028646	Wwox	0.030213002794158443	0.0437816191230879
42	C15_+_+_(47r)	C15_+_+_(44g)	chr3L:12701839-12702339	Ptp69D	0.04973235572904733	0.0498886773730977
43	C15_+_+_(47r)	C15_+_+_(44g)	chr2L:15377041-15377541	esg	0.10042819437150569	0.0400993019832376
44	C15_+_+_(47r)	C15_+_+_(44g)	chr2L:6198411-6198911	smal	0.2776490977672914	0.1513978016846593
45	C15_+_+_(47r)	C15_+_+_(44g)	chr3R:14364140-14364640	NK7.1	0.07428178022860668	0.1063074014752055
46	C15_+_+_(47r)	C15_+_+_(44g)	chr3R:14297411-14297911	NK7.1	0.0815998070528134	0.1063074014752055
47	C15_+_+_(47r)	C15_+_+_(44g)	chr2L:18907058-18907558	tup	0.3365281965328547	0.2685295440332633
48	C15_+_+_(47r)	C15_+_+_(44g)	chr3L:11318371-11318871	CG6175	0.04860966389079999	0.081278034025451
49	C15_+_+_(47r)	C15_+_+_(44g)	chr3L:11319899-11320399	CG6175	0.03887210979026945	0.081278034025451
50	C15_+_+_(47r)	C15_+_+_(44g)	chr3L:21688914-21689414	Atox1	0.1283050985418175	0.1329152198367923
51	C15_+_+_(47r)	C15_+_+_(44g)	chr3L:9037104-9037604	Argk	0.14996039505127093	0.146177015595491
52	C15_+_+_(47r)	C15_+_+_(44g)	chrX:2955621-2956121	kirre	0.2962641167251787	0.0651563378667032
53	C15_+_+_(47r)	C15_+_+_(44g)	chr2R:11814990-11815490	ths	0.4350408507466618	0.2474498728697462
54	C15_+_+_(47r)	C15_+_+_(44g)	chr2R:24341513-24342013	betaTub60D	0.22069813722193862	0.0840059986247068
0	CG8319_+_+_(45r)	CG8319_+_+_(50g)	chr3L:12550814-12551314	ara	0.22296365888760952	0.0701501015737345
1	CG8319_+_+_(45r)	CG8319_+_+_(50g)	chr3L:7621963-7622463	Pura	0.10501351184053088	0.0561699618547496
2	CG8319_+_+_(45r)	CG8319_+_+_(50g)	chr3L:19035095-19035595	Mkp3	0.12795104466386492	0.0786714527581486
3	CG8319_+_+_(45r)	CG8319_+_+_(50g)	chr2R:24132423-24132923	Zfrp8	0.04564521119108113	0.0714809475547343
4	CG8319_+_+_(45r)	CG8319_+_+_(50g)	chr3R:26032491-26032991	E(spl)m7-HLH	0.1268590770723583	0.0629477277777143
5	CG8319_+_+_(45r)	CG8319_+_+_(50g)	chr2R:7533904-7534404	Orc1	0.04051318098237637	0.0460533217707088
6	CG8319_+_+_(45r)	CG8319_+_+_(50g)	chr3R:9035781-9036281	Kdm2	0.04234840849046415	0.0688005336502995
7	CG8319_+_+_(45r)	CG8319_+_+_(50g)	chrX:16831122-16831622	Rai1	0.04284232296349825	0.0700302982756544
8	CG8319_+_+_(45r)	CG8319_+_+_(50g)	chr3R:9035781-9036281	E(var)3-9	0.05727289442047087	0.0805984746967114
9	CG8319_+_+_(45r)	CG8319_+_+_(50g)	chr4:225963-226463	CG31999	0.13461399888959524	0.039571364466634
10	CG8319_+_+_(45r)	CG8319_+_+_(50g)	chr3L:9464484-9464984	phol	0.04116423698881096	0.0678397740602899
11	CG8319_+_+_(45r)	CG8319_+_+_(50g)	chr3L:9451235-9451735	phol	0.048934903100420105	0.0678397740602899
12	CG8319_+_+_(45r)	CG8319_+_+_(50g)	chr2L:5012917-5013417	CG14043	0.03002357719160333	0.0532624148440217
13	CG8319_+_+_(45r)	CG8319_+_+_(50g)	chr3R:23343523-23344023	pnt	0.10847157259411477	0.0557512163228476
14	CG8319_+_+_(45r)	CG8319_+_+_(50g)	chr3L:15108633-15109133	Plp	0.04265653754211945	0.046968520333603
15	CG8319_+_+_(45r)	CG8319_+_+_(50g)	chr3L:15080106-15080606	Plp	0.06426243820917284	0.046968520333603
16	CG8319_+_+_(45r)	CG8319_+_+_(50g)	chrX:11556399-11556899	PGRP-SA	0.23850099400691585	0.035397610342659
17	CG8319_+_+_(45r)	CG8319_+_+_(50g)	chr3R:23734460-23734960	Nup98-96	0.0396724160501117	0.0774597656246234
18	CG8319_+_+_(45r)	CG8319_+_+_(50g)	chr2R:23070933-23071433	l(2)k09913	0.03963390111432799	0.1122230626794534
19	CG8319_+_+_(45r)	CG8319_+_+_(50g)	chr2R:23068410-23068910	l(2)k09913	0.06487919129286591	0.1122230626794534
20	CG8319_+_+_(45r)	CG8319_+_+_(50g)	chr3L:2150921-2151421	zormin	0.06374807883709253	0.0956014629685201
21	CG8319_+_+_(45r)	CG8319_+_+_(50g)	chr3L:13912597-13913097	CG32137	0.07720149282124703	0.0629368038295443
22	CG8319_+_+_(45r)	CG8319_+_+_(50g)	chr2L:8205046-8205546	Acbp1	0.1223587811857802	0.0731105759880405
23	CG8319_+_+_(45r)	CG8319_+_+_(50g)	chrX:8576530-8577030	CG12112	0.10097072610396692	0.0573943990891615
24	CG8319_+_+_(45r)	CG8319_+_+_(50g)	chr3R:9035781-9036281	Kcmf1	0.05157150841611077	0.09259536784147
25	CG8319_+_+_(45r)	CG8319_+_+_(50g)	chr3R:9035781-9036281	Rel	0.04754839629958407	0.0689077408149699
26	CG8319_+_+_(45r)	CG8319_+_+_(50g)	chr3R:29461079-29461579	Spase12	0.04675487112341227	0.1025111645711467
27	CG8319_+_+_(45r)	CG8319_+_+_(50g)	chr2L:19764444-19764944	fbp	0.03440984654174652	0.0392162540902657
28	CG8319_+_+_(45r)	CG8319_+_+_(50g)	chrX:3380237-3380737	dnc	0.12952065044716427	0.0704914772169687
29	CG8319_+_+_(45r)	CG8319_+_+_(50g)	chr3R:8743529-8744029	CG8202	0.04265811511572681	0.0404239373506656
30	CG8319_+_+_(45r)	CG8319_+_+_(50g)	chr3R:23042812-23043312	CG17121	0.053936271755145794	0.0796479445131144
31	CG8319_+_+_(45r)	CG8319_+_+_(50g)	chrX:18641132-18641632	Rip11	0.053518001132845334	0.0747253993072481
32	CG8319_+_+_(45r)	CG8319_+_+_(50g)	chr3L:21952978-21953478	PolH	0.05420199783344359	0.0543936191782954
33	CG8319_+_+_(45r)	CG8319_+_+_(50g)	chr3L:8086432-8086932	mRpL36	0.03376196734929193	0.0743652036982854
34	CG8319_+_+_(45r)	CG8319_+_+_(50g)	chr3R:9733071-9733571	hyd	0.035421466660202405	0.0698400925800769
35	CG8319_+_+_(45r)	CG8319_+_+_(50g)	chr3L:9451235-9451735	CG3437	0.03965212543433095	0.0441702750645707
36	CG8319_+_+_(45r)	CG8319_+_+_(50g)	chr3L:9451235-9451735	eIF4E1	0.11429081676413536	0.1417587347372768
37	CG8319_+_+_(45r)	CG8319_+_+_(50g)	chr4:225963-226463	yellow-h	0.09494480710536936	0.0302139341727615
38	CG8319_+_+_(45r)	CG8319_+_+_(50g)	chrX:20519388-20519888	CG1812	0.03963604953811007	0.051949396137674
39	CG8319_+_+_(45r)	CG8319_+_+_(50g)	chr3R:14376163-14376663	NK7.1	0.07690972218125258	0.0548243718292374
40	CG8319_+_+_(45r)	CG8319_+_+_(50g)	chr3R:8743529-8744029	CG9801	0.08546390652317587	0.0438937735391343
41	CG8319_+_+_(45r)	CG8319_+_+_(50g)	chr3R:8737863-8738363	CG9801	0.08346675640531216	0.0438937735391343
42	CG8319_+_+_(45r)	CG8319_+_+_(50g)	chrX:13232139-13232639	Coq5	0.03476346735893084	0.0638302394923737
43	CG8319_+_+_(45r)	CG8319_+_+_(50g)	chr2L:21109057-21109557	ppk13	0.04603566941647929	0.044165952144514
44	CG8319_+_+_(45r)	CG8319_+_+_(50g)	chr2R:16198078-16198578	mrj	0.07297153434008813	0.0662833216212335
45	CG8319_+_+_(45r)	CG8319_+_+_(50g)	chr3R:9035781-9036281	CG11986	0.03135714123710451	0.0391158067220852
46	CG8319_+_+_(45r)	CG8319_+_+_(50g)	chr3R:19004478-19004978	P5cr	0.033669744483302025	0.0877245396146257
47	CG8319_+_+_(45r)	CG8319_+_+_(50g)	chr2L:9988020-9988520	CG4709	0.05706636176779297	0.0620712652076363
48	CG8319_+_+_(45r)	CG8319_+_+_(50g)	chr2R:16110893-16111393	CysRS	0.030214693815310115	0.0539647383956554
49	CG8319_+_+_(45r)	CG8319_+_+_(50g)	chr2L:5780635-5781135	CG9171	0.04291937944569725	0.0557916064036757
50	CG8319_+_+_(45r)	CG8319_+_+_(50g)	chr4:828348-828848	Gyf	0.06544646607997587	0.1069433222704358
51	CG8319_+_+_(45r)	CG8319_+_+_(50g)	chr3R:31224460-31224960	CG1542	0.03312876182370948	0.0813204744229324
52	CG8319_+_+_(45r)	CG8319_+_+_(50g)	chr2L:5012917-5013417	SelT	0.0658376650666263	0.1280366668242696
53	CG8319_+_+_(45r)	CG8319_+_+_(50g)	chr2L:8286599-8287099	wol	0.04430592616201761	0.0758937025046549
0	Cf2_+_+_(58r)	Cf2_+_+_(61g)	chr2R:9680497-9680997	Uba1	0.032620771383336494	0.1852012092311288
1	Cf2_+_+_(58r)	Cf2_+_+_(61g)	chr2R:9679724-9680224	Uba1	0.047959868627217	0.1852012092311288
2	Cf2_+_+_(58r)	Cf2_+_+_(61g)	chr3L:17004530-17005030	beg	0.04825174553256025	0.0629569665804585
3	Cf2_+_+_(58r)	Cf2_+_+_(61g)	chr2R:20610578-20611078	CG11110	0.040947705045579236	0.0636219763203544
4	Cf2_+_+_(58r)	Cf2_+_+_(61g)	chrX:19159640-19160140	CG33939	0.05434890105199007	0.0551633739715579
5	Cf2_+_+_(58r)	Cf2_+_+_(61g)	chr2R:21034578-21035078	Treh	0.038625051193436524	0.0829164989157181
6	Cf2_+_+_(58r)	Cf2_+_+_(61g)	chrX:18778796-18779296	S6KL	0.03270905939017636	0.0660882243769409
7	Cf2_+_+_(58r)	Cf2_+_+_(61g)	chrX:15816665-15817165	ArgRS	0.04713637754762654	0.1084466153126823
8	Cf2_+_+_(58r)	Cf2_+_+_(61g)	chrX:16851293-16851793	Rai1	0.050588465954733014	0.1071703433019643
9	Cf2_+_+_(58r)	Cf2_+_+_(61g)	chrX:16808762-16809262	Rai1	0.056968617943649096	0.1071703433019643
10	Cf2_+_+_(58r)	Cf2_+_+_(61g)	chr3R:30197495-30197995	Mlc2	0.1802520045645585	0.093204653448813
11	Cf2_+_+_(58r)	Cf2_+_+_(61g)	chr2R:24132423-24132923	tamo	0.037950523084816654	0.0508005048272778
12	Cf2_+_+_(58r)	Cf2_+_+_(61g)	chr3R:23734460-23734960	Rpt5	0.04970957231734803	0.1260367999527522
13	Cf2_+_+_(58r)	Cf2_+_+_(61g)	chr2R:9541035-9541535	CG1827	0.030592906718712235	0.0833248151689704
14	Cf2_+_+_(58r)	Cf2_+_+_(61g)	chr2R:24132423-24132923	mRpS17	0.0343171180185373	0.1249177914382455
15	Cf2_+_+_(58r)	Cf2_+_+_(61g)	chrX:17473994-17474494	CG43658	0.3067772246436298	0.1442529936386536
16	Cf2_+_+_(58r)	Cf2_+_+_(61g)	chrX:17455966-17456466	CG43658	0.3110047718543204	0.1442529936386536
17	Cf2_+_+_(58r)	Cf2_+_+_(61g)	chr2R:17848663-17849163	thr	0.035178631368415474	0.0661062043426539
18	Cf2_+_+_(58r)	Cf2_+_+_(61g)	chr3R:30788232-30788732	dj-1beta	0.03962712156407369	0.1456243999549974
19	Cf2_+_+_(58r)	Cf2_+_+_(61g)	chr2R:7688740-7689240	CG2064	0.04038006657655113	0.0616241788950457
20	Cf2_+_+_(58r)	Cf2_+_+_(61g)	chr3R:19989754-19990254	Hs6st	0.11289102785572966	0.0665075393929805
21	Cf2_+_+_(58r)	Cf2_+_+_(61g)	chr3R:23734460-23734960	mbc	0.050633214870587716	0.092684861810491
22	Cf2_+_+_(58r)	Cf2_+_+_(61g)	chr4:225963-226463	CG31999	0.13461399888959524	0.0659982698383133
23	Cf2_+_+_(58r)	Cf2_+_+_(61g)	chr3R:26461991-26462491	CG5455	0.06708777182818093	0.0490266447267661
24	Cf2_+_+_(58r)	Cf2_+_+_(61g)	chrX:21281930-21282430	CG32521	0.13795696031194762	0.1215447222962036
25	Cf2_+_+_(58r)	Cf2_+_+_(61g)	chrX:21279435-21279935	CG32521	0.18068712664273598	0.1215447222962036
26	Cf2_+_+_(58r)	Cf2_+_+_(61g)	chr2R:19484965-19485465	hpo	0.04204906577351752	0.0948180587813873
27	Cf2_+_+_(58r)	Cf2_+_+_(61g)	chr3R:15283104-15283604	MRG15	0.057473818584934035	0.1116211037411376
28	Cf2_+_+_(58r)	Cf2_+_+_(61g)	chr2L:19036348-19036848	Swip-1	0.054134622778545485	0.0933511995180655
29	Cf2_+_+_(58r)	Cf2_+_+_(61g)	chr3R:23734460-23734960	Nup98-96	0.0396724160501117	0.1086338303089219
30	Cf2_+_+_(58r)	Cf2_+_+_(61g)	chr3L:18812184-18812684	Cat	0.04088647067250483	0.1262427146580861
31	Cf2_+_+_(58r)	Cf2_+_+_(61g)	chr2L:4886328-4886828	mRpS2	0.03379536659738979	0.0962215313433709
32	Cf2_+_+_(58r)	Cf2_+_+_(61g)	chrX:8415071-8415571	CG12123	0.04020338878842234	0.0770629057011666
33	Cf2_+_+_(58r)	Cf2_+_+_(61g)	chrX:14219859-14220359	CG1368	0.03352869920347661	0.0419078031295236
34	Cf2_+_+_(58r)	Cf2_+_+_(61g)	chr3R:22590186-22590686	bond	0.030944331086724362	0.0328594756069522
35	Cf2_+_+_(58r)	Cf2_+_+_(61g)	chr3R:26900911-26901411	T48	0.10747245523956166	0.1194559003414403
36	Cf2_+_+_(58r)	Cf2_+_+_(61g)	chrX:13756121-13756621	Pdcd4	0.05311522208220461	0.2425469274605054
37	Cf2_+_+_(58r)	Cf2_+_+_(61g)	chrX:14219156-14219656	Fbxl4	0.041172274626185175	0.0713320609932928
38	Cf2_+_+_(58r)	Cf2_+_+_(61g)	chr3R:22590186-22590686	AdipoR	0.0494012472750981	0.1389595099069993
39	Cf2_+_+_(58r)	Cf2_+_+_(61g)	chr3R:31223899-31224399	CG15561	0.04105422143047821	0.0930191814542085
40	Cf2_+_+_(58r)	Cf2_+_+_(61g)	chr2L:14663203-14663703	CG15282	0.04742004030302402	0.0351022813176784
41	Cf2_+_+_(58r)	Cf2_+_+_(61g)	chr2R:9680497-9680997	Mmp2	0.2240517474034016	0.0747006559216425
42	Cf2_+_+_(58r)	Cf2_+_+_(61g)	chr2R:9679724-9680224	Mmp2	0.20155323632656588	0.0747006559216425
43	Cf2_+_+_(58r)	Cf2_+_+_(61g)	chr3L:19072218-19072718	Sfxn2	0.03627061626111394	0.0774135651697149
44	Cf2_+_+_(58r)	Cf2_+_+_(61g)	chrX:19602534-19603034	Elys	0.05642505669647455	0.0855225022512342
45	Cf2_+_+_(58r)	Cf2_+_+_(61g)	chrX:19699287-19699787	Elys	0.037472702851607254	0.0855225022512342
46	Cf2_+_+_(58r)	Cf2_+_+_(61g)	chrX:5926530-5927030	CG3726	0.1359082491571162	0.0332131118739621
47	Cf2_+_+_(58r)	Cf2_+_+_(61g)	chr2R:21028369-21028869	CG3295	0.035256975772673546	0.0739189588423998
48	Cf2_+_+_(58r)	Cf2_+_+_(61g)	chr2R:21034578-21035078	CG3295	0.035465847592313374	0.0739189588423998
49	Cf2_+_+_(58r)	Cf2_+_+_(61g)	chr2R:23907828-23908328	Stoml2	0.03442646965846278	0.1115763679803784
50	Cf2_+_+_(58r)	Cf2_+_+_(61g)	chrX:14219859-14220359	l(1)G0007	0.04783537868182063	0.1217716233281466
51	Cf2_+_+_(58r)	Cf2_+_+_(61g)	chrX:14219156-14219656	l(1)G0007	0.05023883808701952	0.1217716233281466
52	Cf2_+_+_(58r)	Cf2_+_+_(61g)	chr3R:20827248-20827748	AdSS	0.060074983383457965	0.1506643544185135
53	Cf2_+_+_(58r)	Cf2_+_+_(61g)	chr2L:18647872-18648372	Cyp310a1	0.1745100091600116	0.0343166932800929
54	Cf2_+_+_(58r)	Cf2_+_+_(61g)	chr3L:10817493-10817993	CG43245	0.032177401021137496	0.0353592405253882
55	Cf2_+_+_(58r)	Cf2_+_+_(61g)	chrX:12472502-12473002	Cpr11A	0.03753602654713093	0.0481808228415632
56	Cf2_+_+_(58r)	Cf2_+_+_(61g)	chrX:20256309-20256809	CG17065	0.03253463766383096	0.0908488230229759
57	Cf2_+_+_(58r)	Cf2_+_+_(61g)	chrX:15613680-15614180	sog	0.030700775294600417	0.1238163727693384
58	Cf2_+_+_(58r)	Cf2_+_+_(61g)	chr3R:9391239-9391739	FER	0.11275887592666198	0.1250490175176903
59	Cf2_+_+_(58r)	Cf2_+_+_(61g)	chr3R:14007267-14007767	Ipp	0.036810899127182536	0.1081639456660218
60	Cf2_+_+_(58r)	Cf2_+_+_(61g)	chr2R:7757965-7758465	Gdap2	0.05240255149140776	0.123944394200383
61	Cf2_+_+_(58r)	Cf2_+_+_(61g)	chr2R:8634098-8634598	ptc	0.18941784631879652	0.1188345426615491
62	Cf2_+_+_(58r)	Cf2_+_+_(61g)	chr2R:16784582-16785082	CG5522	0.05904600530816035	0.1060651963787775
63	Cf2_+_+_(58r)	Cf2_+_+_(61g)	chrX:5964819-5965319	Grip	0.09790251582759278	0.0483969038999038
64	Cf2_+_+_(58r)	Cf2_+_+_(61g)	chrX:5926530-5927030	Grip	0.07953080077492039	0.0483969038999038
65	Cf2_+_+_(58r)	Cf2_+_+_(61g)	chr2L:19036348-19036848	l(2)37Bb	0.03614402020838769	0.0576997711508653
66	Cf2_+_+_(58r)	Cf2_+_+_(61g)	chr2R:9874305-9874805	CG1441	0.03435712419890258	0.0321057039555302
67	Cf2_+_+_(58r)	Cf2_+_+_(61g)	chr2L:4373036-4373536	Atet	0.04555419038538578	0.0644622254215343
68	Cf2_+_+_(58r)	Cf2_+_+_(61g)	chrX:13935843-13936343	mamo	0.3058049010473829	0.0885213567263273
69	Cf2_+_+_(58r)	Cf2_+_+_(61g)	chr3R:22590186-22590686	CSN6	0.034588281767530295	0.1166847388332333
0	CrebA_+_+_(166r)	CrebA_+_+_(163g)	chr2R:22389225-22389725	CG6044	0.11746830333302394	0.2098957021966249
1	CrebA_+_+_(166r)	CrebA_+_+_(163g)	chr3L:21177109-21177609	ko	0.06840156502818338	0.2730454825782873
2	CrebA_+_+_(166r)	CrebA_+_+_(163g)	chr3L:21122838-21123338	ko	0.15100512556265294	0.2730454825782873
3	CrebA_+_+_(166r)	CrebA_+_+_(163g)	chr3L:21054741-21055241	ko	0.13743165011390168	0.2730454825782873
4	CrebA_+_+_(166r)	CrebA_+_+_(163g)	chr2R:12438675-12439175	Lac	0.0952177361854308	0.4085919149434397
5	CrebA_+_+_(166r)	CrebA_+_+_(163g)	chr2R:16104629-16105129	spin	0.05100362985307815	0.2493219918690355
6	CrebA_+_+_(166r)	CrebA_+_+_(163g)	chr3R:8127018-8127518	puc	0.2549079421254399	0.2915652770377503
7	CrebA_+_+_(166r)	CrebA_+_+_(163g)	chr3R:8107818-8108318	puc	0.29176361016950736	0.2915652770377503
8	CrebA_+_+_(166r)	CrebA_+_+_(163g)	chr3R:30789114-30789614	cindr	0.09681454002005631	0.2991973842606621
9	CrebA_+_+_(166r)	CrebA_+_+_(163g)	chr3R:30816157-30816657	cindr	0.3328276969332458	0.2991973842606621
10	CrebA_+_+_(166r)	CrebA_+_+_(163g)	chr2R:12381813-12382313	CG8520	0.05509858394084235	0.0981371539607018
11	CrebA_+_+_(166r)	CrebA_+_+_(163g)	chr2R:12438675-12439175	CG8520	0.06410602993576658	0.0981371539607018
12	CrebA_+_+_(166r)	CrebA_+_+_(163g)	chr3R:19849134-19849634	bnl	0.07194885842232684	0.0350425177865832
13	CrebA_+_+_(166r)	CrebA_+_+_(163g)	chr3L:5542528-5543028	frm	0.24695812875563508	0.2286048201172167
14	CrebA_+_+_(166r)	CrebA_+_+_(163g)	chr3L:5543539-5544039	frm	0.24194089577982128	0.2286048201172167
15	CrebA_+_+_(166r)	CrebA_+_+_(163g)	chr3R:4737876-4738376	smash	0.12763238285332135	0.2704966790996757
16	CrebA_+_+_(166r)	CrebA_+_+_(163g)	chrX:8258865-8259365	CG1632	0.03425743351089098	0.1488540234741177
17	CrebA_+_+_(166r)	CrebA_+_+_(163g)	chr2R:10473608-10474108	whd	0.051797862774229694	0.2017454381439603
18	CrebA_+_+_(166r)	CrebA_+_+_(163g)	chrX:17880354-17880854	CG6847	0.0752537406654883	0.1269130636174695
19	CrebA_+_+_(166r)	CrebA_+_+_(163g)	chr2L:8737104-8737604	raw	0.13265694227536945	0.2287013848633777
20	CrebA_+_+_(166r)	CrebA_+_+_(163g)	chr2L:8720962-8721462	raw	0.14799276749075596	0.2287013848633777
21	CrebA_+_+_(166r)	CrebA_+_+_(163g)	chr2L:20880348-20880848	CG9338	0.26034400486405757	0.0379639585214663
22	CrebA_+_+_(166r)	CrebA_+_+_(163g)	chr2L:20859718-20860218	CG9338	0.27378399568749673	0.0379639585214663
23	CrebA_+_+_(166r)	CrebA_+_+_(163g)	chr2L:20907304-20907804	CG9338	0.23293880276859322	0.0379639585214663
24	CrebA_+_+_(166r)	CrebA_+_+_(163g)	chr2L:20858858-20859358	CG9338	0.2719995974565447	0.0379639585214663
25	CrebA_+_+_(166r)	CrebA_+_+_(163g)	chr3L:19089179-19089679	Mkp3	0.03615172094753433	0.2586236972523566
26	CrebA_+_+_(166r)	CrebA_+_+_(163g)	chr3L:19089694-19090194	Mkp3	0.07288066370748526	0.2586236972523566
27	CrebA_+_+_(166r)	CrebA_+_+_(163g)	chr3R:16347615-16348115	CG14879	0.16175148658032504	0.1303642955381649
28	CrebA_+_+_(166r)	CrebA_+_+_(163g)	chr2R:15250015-15250515	scb	0.2563178605164292	0.1975749746146487
29	CrebA_+_+_(166r)	CrebA_+_+_(163g)	chr2R:15244857-15245357	scb	0.17623464016203752	0.1975749746146487
30	CrebA_+_+_(166r)	CrebA_+_+_(163g)	chrX:19144583-19145083	RhoGAP18B	0.1591388084673832	0.1524252912696093
31	CrebA_+_+_(166r)	CrebA_+_+_(163g)	chrX:19135478-19135978	RhoGAP18B	0.23995162444702817	0.1524252912696093
32	CrebA_+_+_(166r)	CrebA_+_+_(163g)	chr3L:4188053-4188553	mas	0.10791226977332698	0.1934678575993134
33	CrebA_+_+_(166r)	CrebA_+_+_(163g)	chr3L:4176796-4177296	mas	0.06860560077600192	0.1934678575993134
34	CrebA_+_+_(166r)	CrebA_+_+_(163g)	chr2R:11657748-11658248	Tret1-1	0.031763160003780676	0.155883567872656
35	CrebA_+_+_(166r)	CrebA_+_+_(163g)	chrX:16719534-16720034	if	0.06154768172698267	0.2001828494312081
36	CrebA_+_+_(166r)	CrebA_+_+_(163g)	chr2L:20798967-20799467	Fs(2)Ket	0.07814576657232583	0.345967838658968
37	CrebA_+_+_(166r)	CrebA_+_+_(163g)	chrX:5725607-5726107	AdamTS-B	0.13276442702027552	0.1882735068804185
38	CrebA_+_+_(166r)	CrebA_+_+_(163g)	chrX:11418318-11418818	Evi5	0.10404111037327136	0.2137722519086222
39	CrebA_+_+_(166r)	CrebA_+_+_(163g)	chrX:11446754-11447254	Evi5	0.12616574004616954	0.2137722519086222
40	CrebA_+_+_(166r)	CrebA_+_+_(163g)	chr2R:13929412-13929912	shot	0.26257699388575845	0.3204850254196552
41	CrebA_+_+_(166r)	CrebA_+_+_(163g)	chr2R:13913988-13914488	shot	0.2170558496657715	0.3204850254196552
42	CrebA_+_+_(166r)	CrebA_+_+_(163g)	chr2R:13899216-13899716	shot	0.2272074292644068	0.3204850254196552
43	CrebA_+_+_(166r)	CrebA_+_+_(163g)	chr2R:13898576-13899076	shot	0.25246080020078737	0.3204850254196552
44	CrebA_+_+_(166r)	CrebA_+_+_(163g)	chrX:17293947-17294447	Fim	0.23039266229828365	0.2504093141351621
45	CrebA_+_+_(166r)	CrebA_+_+_(163g)	chr2L:12645849-12646349	nub	0.4820419956985359	0.3482709948082912
46	CrebA_+_+_(166r)	CrebA_+_+_(163g)	chr3L:17608779-17609279	Eip74EF	0.17987152302302264	0.2838441596693335
47	CrebA_+_+_(166r)	CrebA_+_+_(163g)	chr2L:7090646-7091146	milt	0.10046562275439316	0.2390606015189971
48	CrebA_+_+_(166r)	CrebA_+_+_(163g)	chrX:14711022-14711522	NetB	0.17697436586173723	0.2160164193451617
49	CrebA_+_+_(166r)	CrebA_+_+_(163g)	chr2R:11657748-11658248	tou	0.044494271662047655	0.3677968001643251
50	CrebA_+_+_(166r)	CrebA_+_+_(163g)	chr2R:6023547-6024047	Src42A	0.06158963942888008	0.2734943958898071
51	CrebA_+_+_(166r)	CrebA_+_+_(163g)	chr2R:15899120-15899620	bug	0.0378601055266899	0.114316175438516
52	CrebA_+_+_(166r)	CrebA_+_+_(163g)	chr3R:29770126-29770626	kay	0.29133328779290535	0.2638725628318374
53	CrebA_+_+_(166r)	CrebA_+_+_(163g)	chr3R:29761628-29762128	kay	0.2780569424174306	0.2638725628318374
54	CrebA_+_+_(166r)	CrebA_+_+_(163g)	chr2R:15899120-15899620	sli	0.08393842188392962	0.3012089783902483
55	CrebA_+_+_(166r)	CrebA_+_+_(163g)	chrX:17293947-17294447	B-H2	0.041535930303653	0.0795719374080525
56	CrebA_+_+_(166r)	CrebA_+_+_(163g)	chr3R:30816157-30816657	CG15544	0.09368994010246401	0.2019341422801006
57	CrebA_+_+_(166r)	CrebA_+_+_(163g)	chr3R:30798518-30799018	CG15544	0.053929470376016544	0.2019341422801006
58	CrebA_+_+_(166r)	CrebA_+_+_(163g)	chr2R:12438675-12439175	Cpr49Ac	0.07671629688395042	0.1295047426990242
59	CrebA_+_+_(166r)	CrebA_+_+_(163g)	chr2R:12381813-12382313	Cpr49Ac	0.06297692937563341	0.1295047426990242
60	CrebA_+_+_(166r)	CrebA_+_+_(163g)	chr2R:20581007-20581507	qsm	0.1905479588116972	0.3231178965072698
61	CrebA_+_+_(166r)	CrebA_+_+_(163g)	chr2R:19171337-19171837	hppy	0.0858258898422242	0.2314308849387001
62	CrebA_+_+_(166r)	CrebA_+_+_(163g)	chr2R:19233759-19234259	hppy	0.06892233955811831	0.2314308849387001
63	CrebA_+_+_(166r)	CrebA_+_+_(163g)	chrX:18368479-18368979	CrebB	0.06287563650635832	0.156778409926083
64	CrebA_+_+_(166r)	CrebA_+_+_(163g)	chrX:18369611-18370111	CrebB	0.07425590297940295	0.156778409926083
65	CrebA_+_+_(166r)	CrebA_+_+_(163g)	chr2L:20911158-20911658	sky	0.09550037854650034	0.1657389839259883
66	CrebA_+_+_(166r)	CrebA_+_+_(163g)	chr2L:20907304-20907804	sky	0.10604312167990981	0.1657389839259883
67	CrebA_+_+_(166r)	CrebA_+_+_(163g)	chr2L:20859718-20860218	sky	0.07336883321218532	0.1657389839259883
68	CrebA_+_+_(166r)	CrebA_+_+_(163g)	chr3L:8692401-8692901	SrpRbeta	0.09358039081632721	0.3068216777859002
69	CrebA_+_+_(166r)	CrebA_+_+_(163g)	chr3L:21122838-21123338	CG33284	0.055933198154415116	0.076047662984348
70	CrebA_+_+_(166r)	CrebA_+_+_(163g)	chr2L:7711205-7711705	Tep2	0.09182987030822817	0.0931771265232679
71	CrebA_+_+_(166r)	CrebA_+_+_(163g)	chrX:5010219-5010719	ovo	0.22354712731184373	0.3640543284922093
72	CrebA_+_+_(166r)	CrebA_+_+_(163g)	chr2L:10745966-10746466	CG31869	0.3536348363512533	0.2150954376606746
73	CrebA_+_+_(166r)	CrebA_+_+_(163g)	chr3L:8549767-8550267	rhea	0.18509915553361841	0.1962386169627621
74	CrebA_+_+_(166r)	CrebA_+_+_(163g)	chr3R:12716396-12716896	NijC	0.07039254598222255	0.0687472288968938
75	CrebA_+_+_(166r)	CrebA_+_+_(163g)	chr2L:12719264-12719764	spict	0.07401824513347496	0.1868010029058208
76	CrebA_+_+_(166r)	CrebA_+_+_(163g)	chrX:4111266-4111766	GlcAT-I	0.04193834949307529	0.1481442153298162
77	CrebA_+_+_(166r)	CrebA_+_+_(163g)	chrX:14493796-14494296	CG9411	0.16063520734526368	0.1068110145049966
78	CrebA_+_+_(166r)	CrebA_+_+_(163g)	chr2R:23392965-23393465	Golgin245	0.04172728752708135	0.1340839294980894
79	CrebA_+_+_(166r)	CrebA_+_+_(163g)	chr2R:22303918-22304418	wdp	0.1311069871159828	0.17858919911033
80	CrebA_+_+_(166r)	CrebA_+_+_(163g)	chr2R:22301256-22301756	wdp	0.12955504631029746	0.17858919911033
81	CrebA_+_+_(166r)	CrebA_+_+_(163g)	chr2R:15808350-15808850	Zasp52	0.27761063649035356	0.2889748912893965
82	CrebA_+_+_(166r)	CrebA_+_+_(163g)	chr2R:15806388-15806888	Zasp52	0.2877659223497123	0.2889748912893965
83	CrebA_+_+_(166r)	CrebA_+_+_(163g)	chrX:13804382-13804882	AMPdeam	0.05569944727697349	0.2170819487945989
84	CrebA_+_+_(166r)	CrebA_+_+_(163g)	chr2L:16355678-16356178	CaBP1	0.10348218187313496	0.4151323665061925
85	CrebA_+_+_(166r)	CrebA_+_+_(163g)	chr3R:4737876-4738376	tacc	0.1024404417299376	0.2633693244048398
86	CrebA_+_+_(166r)	CrebA_+_+_(163g)	chr2R:24751337-24751837	Usp15-31	0.04918106747410037	0.1185582249904596
87	CrebA_+_+_(166r)	CrebA_+_+_(163g)	chr2R:24749416-24749916	Usp15-31	0.051899816402899056	0.1185582249904596
88	CrebA_+_+_(166r)	CrebA_+_+_(163g)	chr3L:4109538-4110038	Ras64B	0.05504044041830932	0.1316827231161206
89	CrebA_+_+_(166r)	CrebA_+_+_(163g)	chr3L:3270537-3271037	ZnT63C	0.07957829224436858	0.1693887645543759
90	CrebA_+_+_(166r)	CrebA_+_+_(163g)	chr3L:3347545-3348045	ZnT63C	0.04290947520590073	0.1693887645543759
91	CrebA_+_+_(166r)	CrebA_+_+_(163g)	chrX:11559898-11560398	PGRP-SA	0.2738255844974567	0.0855903768875695
92	CrebA_+_+_(166r)	CrebA_+_+_(163g)	chr2L:7090646-7091146	Pvf2	0.258635328537429	0.1956284026207894
93	CrebA_+_+_(166r)	CrebA_+_+_(163g)	chr3R:9030711-9031211	neur	0.07282506175427936	0.1318712422099029
94	CrebA_+_+_(166r)	CrebA_+_+_(163g)	chrX:6539076-6539576	CG34417	0.3012677127725479	0.3142122803238054
95	CrebA_+_+_(166r)	CrebA_+_+_(163g)	chrX:6604000-6604500	CG34417	0.23643171041393948	0.3142122803238054
96	CrebA_+_+_(166r)	CrebA_+_+_(163g)	chr3L:17050246-17050746	Ilp8	0.33465962908629465	0.1601719176635573
97	CrebA_+_+_(166r)	CrebA_+_+_(163g)	chr3L:17031114-17031614	Ilp8	0.3703382652921606	0.1601719176635573
98	CrebA_+_+_(166r)	CrebA_+_+_(163g)	chr2L:12645849-12646349	pdm2	0.3129664545134389	0.1946069148099432
99	CrebA_+_+_(166r)	CrebA_+_+_(163g)	chr2R:5812909-5813409	ZnT41F	0.06081158306418789	0.1537952803296679
100	CrebA_+_+_(166r)	CrebA_+_+_(163g)	chr2R:5816632-5817132	ZnT41F	0.07006841733920069	0.1537952803296679
101	CrebA_+_+_(166r)	CrebA_+_+_(163g)	chr3R:4737876-4738376	ctrip	0.05291125974401575	0.267256603209834
102	CrebA_+_+_(166r)	CrebA_+_+_(163g)	chrX:4136436-4136936	Fas2	0.2896487999242573	0.3539244956408561
103	CrebA_+_+_(166r)	CrebA_+_+_(163g)	chrX:4111266-4111766	Fas2	0.2491799663887439	0.3539244956408561
104	CrebA_+_+_(166r)	CrebA_+_+_(163g)	chr2R:11657748-11658248	CG9005	0.036009215260428884	0.2586689632302115
105	CrebA_+_+_(166r)	CrebA_+_+_(163g)	chr2L:7869383-7869883	CG7115	0.07115279195379055	0.1601190164649246
106	CrebA_+_+_(166r)	CrebA_+_+_(163g)	chr3L:20538407-20538907	Rcd2	0.1519630308463524	0.1209791582693064
107	CrebA_+_+_(166r)	CrebA_+_+_(163g)	chr3L:15225335-15225835	Tollo	0.10354151493683737	0.2491905623021189
108	CrebA_+_+_(166r)	CrebA_+_+_(163g)	chr3R:22623823-22624323	loco	0.09881198644007272	0.2022269614929341
109	CrebA_+_+_(166r)	CrebA_+_+_(163g)	chr3R:22636187-22636687	loco	0.15635255273149243	0.2022269614929341
110	CrebA_+_+_(166r)	CrebA_+_+_(163g)	chr2L:7361417-7361917	wg	0.2444076702394872	0.2190516922477467
111	CrebA_+_+_(166r)	CrebA_+_+_(163g)	chr2R:24593706-24594206	ITP	0.10811219610295862	0.1805699272638584
112	CrebA_+_+_(166r)	CrebA_+_+_(163g)	chr2L:8164485-8164985	CG8668	0.03360781955921973	0.2176195553344888
113	CrebA_+_+_(166r)	CrebA_+_+_(163g)	chr3R:25488899-25489399	Dhap-at	0.041835265213797976	0.064150889553772
114	CrebA_+_+_(166r)	CrebA_+_+_(163g)	chr2L:14425645-14426145	elB	0.3713115265960465	0.3248566897200808
115	CrebA_+_+_(166r)	CrebA_+_+_(163g)	chr3L:11532004-11532504	chrb	0.06404850639217537	0.3053909031438082
116	CrebA_+_+_(166r)	CrebA_+_+_(163g)	chrX:17688462-17688962	raskol	0.14305205855923026	0.2378563815037289
117	CrebA_+_+_(166r)	CrebA_+_+_(163g)	chrX:17691388-17691888	raskol	0.1484828383052399	0.2378563815037289
118	CrebA_+_+_(166r)	CrebA_+_+_(163g)	chrX:15079840-15080340	Lsd-2	0.16431378485184417	0.3499213380777616
119	CrebA_+_+_(166r)	CrebA_+_+_(163g)	chr3L:3270537-3271037	Larp4B	0.10894896713653603	0.285712475471914
120	CrebA_+_+_(166r)	CrebA_+_+_(163g)	chrX:9132450-9132950	fend	0.1494022774426859	0.15003026478348
121	CrebA_+_+_(166r)	CrebA_+_+_(163g)	chr2R:20581007-20581507	Hil	0.09549652312067036	0.1721035150061363
122	CrebA_+_+_(166r)	CrebA_+_+_(163g)	chr2L:15035975-15036475	mol	0.14169339632148412	0.1121439228850235
123	CrebA_+_+_(166r)	CrebA_+_+_(163g)	chrX:11446754-11447254	Drak	0.1378529799639562	0.3322257229586222
124	CrebA_+_+_(166r)	CrebA_+_+_(163g)	chr2R:24749416-24749916	Reg-5	0.0313591910118578	0.1905783543451065
125	CrebA_+_+_(166r)	CrebA_+_+_(163g)	chr2R:24678958-24679458	Mmp1	0.4145793333618055	0.2027841854585231
126	CrebA_+_+_(166r)	CrebA_+_+_(163g)	chr3L:20199098-20199598	CG42674	0.1702525293420915	0.2202354070830191
127	CrebA_+_+_(166r)	CrebA_+_+_(163g)	chrX:21068309-21068809	CG32512	0.11173191828805516	0.1419904942552491
128	CrebA_+_+_(166r)	CrebA_+_+_(163g)	chrX:21057776-21058276	CG32512	0.053778276050234886	0.1419904942552491
129	CrebA_+_+_(166r)	CrebA_+_+_(163g)	chr3R:21094257-21094757	RhoGAP93B	0.030849834771923882	0.1477662062148599
130	CrebA_+_+_(166r)	CrebA_+_+_(163g)	chr2L:16755725-16756225	yellow-b	0.4832814886972088	0.149270530860856
131	CrebA_+_+_(166r)	CrebA_+_+_(163g)	chr3L:1374589-1375089	Myo61F	0.18517951767133756	0.2170811056316142
132	CrebA_+_+_(166r)	CrebA_+_+_(163g)	chr3L:1319853-1320353	Myo61F	0.19687357157850754	0.2170811056316142
133	CrebA_+_+_(166r)	CrebA_+_+_(163g)	chr3L:1353990-1354490	Myo61F	0.13862638923721027	0.2170811056316142
134	CrebA_+_+_(166r)	CrebA_+_+_(163g)	chr3L:16699820-16700320	Baldspot	0.04782297631546759	0.1871694885530486
135	CrebA_+_+_(166r)	CrebA_+_+_(163g)	chr3L:11532004-11532504	Mob2	0.14354684881180604	0.2830008429550373
136	CrebA_+_+_(166r)	CrebA_+_+_(163g)	chr2L:7090646-7091146	Pvf3	0.18543543293732542	0.2011222491867995
137	CrebA_+_+_(166r)	CrebA_+_+_(163g)	chr2L:7155312-7155812	Pvf3	0.20358825598688965	0.2011222491867995
138	CrebA_+_+_(166r)	CrebA_+_+_(163g)	chr2L:20798967-20799467	CG9331	0.06623386019141884	0.2366679327889252
139	CrebA_+_+_(166r)	CrebA_+_+_(163g)	chr3L:3941997-3942497	CG14984	0.21639611860601143	0.1212852903792228
140	CrebA_+_+_(166r)	CrebA_+_+_(163g)	chrX:11559898-11560398	rho-4	0.06957852708762154	0.2161676768843763
141	CrebA_+_+_(166r)	CrebA_+_+_(163g)	chr2L:16618568-16619068	CG31815	0.06103214430693469	0.1189149847755348
142	CrebA_+_+_(166r)	CrebA_+_+_(163g)	chr2L:4576558-4577058	dpy	0.4034512609038582	0.3009584543164842
143	CrebA_+_+_(166r)	CrebA_+_+_(163g)	chr2L:4656717-4657217	dpy	0.3249170136413576	0.3009584543164842
144	CrebA_+_+_(166r)	CrebA_+_+_(163g)	chrX:1587155-1587655	br	0.41070583452855886	0.5006766931485616
145	CrebA_+_+_(166r)	CrebA_+_+_(163g)	chr3R:21172065-21172565	CG5862	0.047768647202856424	0.183529161287679
146	CrebA_+_+_(166r)	CrebA_+_+_(163g)	chr2L:16529370-16529870	CG5953	0.2476089806751428	0.1458126725431521
147	CrebA_+_+_(166r)	CrebA_+_+_(163g)	chr3R:7174767-7175267	lap	0.06541486243810607	0.2174800167192975
148	CrebA_+_+_(166r)	CrebA_+_+_(163g)	chr3L:13946013-13946513	CG32137	0.14117504210516557	0.1953605494175094
149	CrebA_+_+_(166r)	CrebA_+_+_(163g)	chr2L:16618568-16619068	mtgo	0.2218243084295217	0.4400160266924134
150	CrebA_+_+_(166r)	CrebA_+_+_(163g)	chr2L:18568932-18569432	CG10413	0.04147880076914592	0.1429953104771691
151	CrebA_+_+_(166r)	CrebA_+_+_(163g)	chr3R:6298613-6299113	Osi14	0.22935929973303848	0.1010973094773991
152	CrebA_+_+_(166r)	CrebA_+_+_(163g)	chr2L:1590086-1590586	haf	0.13353847836451402	0.1859339680573948
153	CrebA_+_+_(166r)	CrebA_+_+_(163g)	chr3R:30816157-30816657	wts	0.0577752116905288	0.2010590672161643
154	CrebA_+_+_(166r)	CrebA_+_+_(163g)	chr3L:11714193-11714693	CG14132	0.09172662501729753	0.1406931646411275
155	CrebA_+_+_(166r)	CrebA_+_+_(163g)	chr2L:5285692-5286192	vri	0.0976290966657844	0.162529355252573
156	CrebA_+_+_(166r)	CrebA_+_+_(163g)	chr2R:5689010-5689510	scaf	0.35771699578633837	0.214341901486515
157	CrebA_+_+_(166r)	CrebA_+_+_(163g)	chr2R:5681933-5682433	scaf	0.36334566936531865	0.214341901486515
158	CrebA_+_+_(166r)	CrebA_+_+_(163g)	chrX:720294-720794	fz3	0.0634786309436558	0.2525800933909245
159	CrebA_+_+_(166r)	CrebA_+_+_(163g)	chr3L:22711361-22711861	CG11370	0.03634163588801324	0.0309523337960106
160	CrebA_+_+_(166r)	CrebA_+_+_(163g)	chr2R:24593706-24594206	pio	0.35303505703971144	0.4968586918853298
161	CrebA_+_+_(166r)	CrebA_+_+_(163g)	chr3R:27593191-27593691	CG5639	0.14681103824950725	0.183289596531994
162	CrebA_+_+_(166r)	CrebA_+_+_(163g)	chr3R:27556851-27557351	CG5639	0.03932896269545484	0.183289596531994
163	CrebA_+_+_(166r)	CrebA_+_+_(163g)	chr2R:13583456-13583956	CG6145	0.11315482974846963	0.18038730279094
164	CrebA_+_+_(166r)	CrebA_+_+_(163g)	chr2R:13498601-13499101	CG6145	0.12255369297278784	0.18038730279094
165	CrebA_+_+_(166r)	CrebA_+_+_(163g)	chr3R:27556851-27557351	Klp98A	0.1475756037469879	0.1861604437169867
166	CrebA_+_+_(166r)	CrebA_+_+_(163g)	chrX:18278904-18279404	upd1	0.2711162434960424	0.1391372161388806
167	CrebA_+_+_(166r)	CrebA_+_+_(163g)	chr2R:19421837-19422337	CG9416	0.038283336450690285	0.2371813008016746
168	CrebA_+_+_(166r)	CrebA_+_+_(163g)	chrX:720294-720794	sdk	0.10354358012397384	0.2967821602018166
169	CrebA_+_+_(166r)	CrebA_+_+_(163g)	chr2R:16022565-16023065	CG8389	0.03253091494327315	0.1230683992913644
170	CrebA_+_+_(166r)	CrebA_+_+_(163g)	chr2L:19914811-19915311	sick	0.1995968235734784	0.2926600487234805
171	CrebA_+_+_(166r)	CrebA_+_+_(163g)	chr2L:9429666-9430166	Aldh	0.22109449614220952	0.0430957509190381
172	CrebA_+_+_(166r)	CrebA_+_+_(163g)	chr2L:9387935-9388435	Aldh	0.13394667621387168	0.0430957509190381
173	CrebA_+_+_(166r)	CrebA_+_+_(163g)	chrX:8113720-8114220	mys	0.21225666696791032	0.2917351554568211
174	CrebA_+_+_(166r)	CrebA_+_+_(163g)	chr2L:18568932-18569432	MESR3	0.08151230748730295	0.1537005811415964
175	CrebA_+_+_(166r)	CrebA_+_+_(163g)	chr2L:21617185-21617685	CG2201	0.17160427464775713	0.0994509828048978
176	CrebA_+_+_(166r)	CrebA_+_+_(163g)	chr3R:19632557-19633057	subdued	0.12292869901801191	0.1304149828628089
177	CrebA_+_+_(166r)	CrebA_+_+_(163g)	chr2L:10745966-10746466	CG17124	0.358845056462949	0.1844552598184993
178	CrebA_+_+_(166r)	CrebA_+_+_(163g)	chr2L:8085580-8086080	Bsg	0.10386073078260054	0.3403831822586251
179	CrebA_+_+_(166r)	CrebA_+_+_(163g)	chr3R:25488899-25489399	Fur1	0.13386761345323173	0.2969656369006883
180	CrebA_+_+_(166r)	CrebA_+_+_(163g)	chr2L:6546779-6547279	eya	0.13180773558588962	0.1189949734508443
181	CrebA_+_+_(166r)	CrebA_+_+_(163g)	chr3R:21094257-21094757	Cortactin	0.05592735290034212	0.2140864136423924
182	CrebA_+_+_(166r)	CrebA_+_+_(163g)	chr3R:13742187-13742687	kmr	0.18883448446364878	0.2990004713479086
183	CrebA_+_+_(166r)	CrebA_+_+_(163g)	chrX:17880354-17880854	CG6398	0.10851581074306207	0.3666867482518961
184	CrebA_+_+_(166r)	CrebA_+_+_(163g)	chr2R:7270927-7271427	pwn	0.1579902065817024	0.209865918689972
185	CrebA_+_+_(166r)	CrebA_+_+_(163g)	chr3R:25735465-25735965	LpR2	0.11067387315715141	0.3010111264817698
186	CrebA_+_+_(166r)	CrebA_+_+_(163g)	chr2L:8171620-8172120	Pvr	0.08981816439676982	0.2197777546294185
187	CrebA_+_+_(166r)	CrebA_+_+_(163g)	chrX:2085912-2086412	CG4313	0.03253580063184659	0.0798422912392661
188	CrebA_+_+_(166r)	CrebA_+_+_(163g)	chr3L:17608779-17609279	CG7484	0.11917457489495213	0.2725668747165511
189	CrebA_+_+_(166r)	CrebA_+_+_(163g)	chrX:16719534-16720034	CG34325	0.27205930157721114	0.129763512770661
190	CrebA_+_+_(166r)	CrebA_+_+_(163g)	chr2R:15235676-15236176	Fs	0.24592993041455352	0.2611954085006278
191	CrebA_+_+_(166r)	CrebA_+_+_(163g)	chr3R:10175802-10176302	CG12814	0.3896541723661582	0.2571346401955984
192	CrebA_+_+_(166r)	CrebA_+_+_(163g)	chrX:5621107-5621607	Mlc-c	0.1890008069016693	0.2826808212686916
193	CrebA_+_+_(166r)	CrebA_+_+_(163g)	chr2L:9735743-9736243	CG31710	0.045955772213666105	0.1959495740017197
194	CrebA_+_+_(166r)	CrebA_+_+_(163g)	chr2R:19171337-19171837	ena	0.13045195578097454	0.2993027980873769
195	CrebA_+_+_(166r)	CrebA_+_+_(163g)	chr3L:15140317-15140817	Pdi	0.24949494266233563	0.5136708393030432
196	CrebA_+_+_(166r)	CrebA_+_+_(163g)	chr3L:4188053-4188553	CG43367	0.032920839757282945	0.099552775174762
197	CrebA_+_+_(166r)	CrebA_+_+_(163g)	chrX:720294-720794	CG5273	0.04799492846142986	0.1695314774890013
198	CrebA_+_+_(166r)	CrebA_+_+_(163g)	chr3L:5543539-5544039	Sras	0.07953801774391735	0.1348011289608112
199	CrebA_+_+_(166r)	CrebA_+_+_(163g)	chr2R:6681855-6682355	Tdc2	0.18305416913506023	0.0857281992023557
200	CrebA_+_+_(166r)	CrebA_+_+_(163g)	chrX:1842862-1843362	prage	0.33964464708783565	0.1931107134899102
201	CrebA_+_+_(166r)	CrebA_+_+_(163g)	chr2L:6423223-6423723	Tig	0.25928386896911093	0.1461431483243382
202	CrebA_+_+_(166r)	CrebA_+_+_(163g)	chrX:1241917-1242417	DAAM	0.13647328090366717	0.2059366856619081
203	CrebA_+_+_(166r)	CrebA_+_+_(163g)	chr3L:4120405-4120905	CG14995	0.04394728757651691	0.1138114119681802
204	CrebA_+_+_(166r)	CrebA_+_+_(163g)	chr2L:16355678-16356178	CG4455	0.14789544574411223	0.3161142194108843
205	CrebA_+_+_(166r)	CrebA_+_+_(163g)	chr3R:21848395-21848895	glec	0.0595142426607016	0.2229794140316549
206	CrebA_+_+_(166r)	CrebA_+_+_(163g)	chr2L:9493214-9493714	numb	0.10239876268946797	0.2909553768238602
0	CrebB_+_+_(163r)	CrebB_+_+_(146g)	chr3L:4103830-4104330	CG1299	0.034678928388102916	0.1151278901903777
1	CrebB_+_+_(163r)	CrebB_+_+_(146g)	chr3L:4109538-4110038	CG1299	0.1242497845886443	0.1151278901903777
2	CrebB_+_+_(163r)	CrebB_+_+_(146g)	chr3L:4188053-4188553	CG1299	0.11609588989873317	0.1151278901903777
3	CrebB_+_+_(163r)	CrebB_+_+_(146g)	chr3L:4119048-4119548	CG1299	0.08967377375764174	0.1151278901903777
4	CrebB_+_+_(163r)	CrebB_+_+_(146g)	chr3L:4176796-4177296	CG1299	0.12650657584764816	0.1151278901903777
5	CrebB_+_+_(163r)	CrebB_+_+_(146g)	chr3R:7214486-7214986	CG1234	0.056524085346280374	0.1349855866433769
6	CrebB_+_+_(163r)	CrebB_+_+_(146g)	chr2L:10690855-10691355	CG7296	0.132504880623941	0.0651037845042221
7	CrebB_+_+_(163r)	CrebB_+_+_(146g)	chr2L:10686951-10687451	CG7296	0.1340014157318151	0.0651037845042221
8	CrebB_+_+_(163r)	CrebB_+_+_(146g)	chr2R:14576877-14577377	LamC	0.2677084250705914	0.1978795771782137
9	CrebB_+_+_(163r)	CrebB_+_+_(146g)	chr2R:14572789-14573289	LamC	0.2685567459529651	0.1978795771782137
10	CrebB_+_+_(163r)	CrebB_+_+_(146g)	chr2R:14577773-14578273	LamC	0.26231220902327074	0.1978795771782137
11	CrebB_+_+_(163r)	CrebB_+_+_(146g)	chr3R:8127018-8127518	puc	0.2549079421254399	0.2226472664221072
12	CrebB_+_+_(163r)	CrebB_+_+_(146g)	chr3R:8107818-8108318	puc	0.29176361016950736	0.2226472664221072
13	CrebB_+_+_(163r)	CrebB_+_+_(146g)	chr3R:19849134-19849634	bnl	0.07194885842232684	0.0379266456551116
14	CrebB_+_+_(163r)	CrebB_+_+_(146g)	chr2R:11921207-11921707	exp	0.16191408684999656	0.1118445016947119
15	CrebB_+_+_(163r)	CrebB_+_+_(146g)	chr2R:11921953-11922453	exp	0.1551468086424772	0.1118445016947119
16	CrebB_+_+_(163r)	CrebB_+_+_(146g)	chr3L:4109538-4110038	Chd64	0.2745070034086799	0.2283659798032005
17	CrebB_+_+_(163r)	CrebB_+_+_(146g)	chrX:13406251-13406751	Neto	0.032949394640990656	0.0440072768019301
18	CrebB_+_+_(163r)	CrebB_+_+_(146g)	chrX:2085912-2086412	CG4025	0.10172311977505229	0.0856399693434182
19	CrebB_+_+_(163r)	CrebB_+_+_(146g)	chrX:2051359-2051859	CG4025	0.08598720188955705	0.0856399693434182
20	CrebB_+_+_(163r)	CrebB_+_+_(146g)	chr2R:7688740-7689240	CG2064	0.04038006657655113	0.0780914494024427
21	CrebB_+_+_(163r)	CrebB_+_+_(146g)	chr3L:17887350-17887850	CG5567	0.030865807639107203	0.0774900232729206
22	CrebB_+_+_(163r)	CrebB_+_+_(146g)	chrX:8258865-8259365	CG1632	0.03425743351089098	0.0976138353890869
23	CrebB_+_+_(163r)	CrebB_+_+_(146g)	chrX:8579839-8580339	CG12065	0.17669586865630474	0.1318225866782044
24	CrebB_+_+_(163r)	CrebB_+_+_(146g)	chrX:8574868-8575368	CG12065	0.1571334099119412	0.1318225866782044
25	CrebB_+_+_(163r)	CrebB_+_+_(146g)	chrX:8532492-8532992	CG12065	0.14694424743340395	0.1318225866782044
26	CrebB_+_+_(163r)	CrebB_+_+_(146g)	chrX:8536799-8537299	CG12065	0.1841932472029647	0.1318225866782044
27	CrebB_+_+_(163r)	CrebB_+_+_(146g)	chrX:17596308-17596808	CG12991	0.21731205199872422	0.1631121251254113
28	CrebB_+_+_(163r)	CrebB_+_+_(146g)	chr2L:8737104-8737604	raw	0.13265694227536945	0.1421529437462088
29	CrebB_+_+_(163r)	CrebB_+_+_(146g)	chr2L:8720962-8721462	raw	0.14799276749075596	0.1421529437462088
30	CrebB_+_+_(163r)	CrebB_+_+_(146g)	chr3R:8127018-8127518	CG7878	0.07037643875162355	0.1326779607941704
31	CrebB_+_+_(163r)	CrebB_+_+_(146g)	chrX:9931779-9932279	CG9691	0.04195714175614372	0.1627295783266615
32	CrebB_+_+_(163r)	CrebB_+_+_(146g)	chrX:5725607-5726107	AdamTS-B	0.13276442702027552	0.1587083280279982
33	CrebB_+_+_(163r)	CrebB_+_+_(146g)	chrX:18252615-18253115	upd2	0.2721900627782293	0.1218254624222991
34	CrebB_+_+_(163r)	CrebB_+_+_(146g)	chrX:18278904-18279404	upd2	0.24924495950880968	0.1218254624222991
35	CrebB_+_+_(163r)	CrebB_+_+_(146g)	chrX:18247726-18248226	upd2	0.27174438961451913	0.1218254624222991
36	CrebB_+_+_(163r)	CrebB_+_+_(146g)	chr3L:17608779-17609279	Ndfip	0.03271281980894043	0.0627808007334863
37	CrebB_+_+_(163r)	CrebB_+_+_(146g)	chr3L:21355005-21355505	rgn	0.23589627456523624	0.228219643166741
38	CrebB_+_+_(163r)	CrebB_+_+_(146g)	chr2R:13929412-13929912	shot	0.26257699388575845	0.2456337682948953
39	CrebB_+_+_(163r)	CrebB_+_+_(146g)	chr2R:13913988-13914488	shot	0.2170558496657715	0.2456337682948953
40	CrebB_+_+_(163r)	CrebB_+_+_(146g)	chr2R:13899216-13899716	shot	0.2272074292644068	0.2456337682948953
41	CrebB_+_+_(163r)	CrebB_+_+_(146g)	chr2R:13898576-13899076	shot	0.25246080020078737	0.2456337682948953
42	CrebB_+_+_(163r)	CrebB_+_+_(146g)	chrX:11418318-11418818	Evi5	0.10404111037327136	0.1496960470085706
43	CrebB_+_+_(163r)	CrebB_+_+_(146g)	chrX:11446754-11447254	Evi5	0.12616574004616954	0.1496960470085706
44	CrebB_+_+_(163r)	CrebB_+_+_(146g)	chrX:9076955-9077455	CG44325	0.1249481115102415	0.1994985909437776
45	CrebB_+_+_(163r)	CrebB_+_+_(146g)	chrX:9076388-9076888	CG44325	0.13026390019412054	0.1994985909437776
46	CrebB_+_+_(163r)	CrebB_+_+_(146g)	chrX:9075646-9076146	CG44325	0.14865650802742955	0.1994985909437776
47	CrebB_+_+_(163r)	CrebB_+_+_(146g)	chr3L:17608779-17609279	Vps60	0.05263651717430116	0.1320529806605223
48	CrebB_+_+_(163r)	CrebB_+_+_(146g)	chrX:17293947-17294447	Fim	0.23039266229828365	0.1868625975922472
49	CrebB_+_+_(163r)	CrebB_+_+_(146g)	chr2L:7492943-7493443	Ziz	0.08920922201075591	0.0963930704176183
50	CrebB_+_+_(163r)	CrebB_+_+_(146g)	chr2L:7518217-7518717	Ziz	0.08713817124880935	0.0963930704176183
51	CrebB_+_+_(163r)	CrebB_+_+_(146g)	chr2L:7519604-7520104	Ziz	0.06428709453980022	0.0963930704176183
52	CrebB_+_+_(163r)	CrebB_+_+_(146g)	chr2L:7512750-7513250	Ziz	0.09203359334856254	0.0963930704176183
53	CrebB_+_+_(163r)	CrebB_+_+_(146g)	chrX:18247726-18248226	upd3	0.22790046042086476	0.1256525270220561
54	CrebB_+_+_(163r)	CrebB_+_+_(146g)	chrX:18253485-18253985	upd3	0.22346008751443014	0.1256525270220561
55	CrebB_+_+_(163r)	CrebB_+_+_(146g)	chr2R:6023547-6024047	Src42A	0.06158963942888008	0.1730979950975082
56	CrebB_+_+_(163r)	CrebB_+_+_(146g)	chr2L:19415170-19415670	Pax	0.21093837001784593	0.1748532372344115
57	CrebB_+_+_(163r)	CrebB_+_+_(146g)	chr2L:19420965-19421465	Pax	0.25209191740777737	0.1748532372344115
58	CrebB_+_+_(163r)	CrebB_+_+_(146g)	chr3R:24798790-24799290	CG13631	0.08640968704164598	0.0665093646335754
59	CrebB_+_+_(163r)	CrebB_+_+_(146g)	chr3R:24799306-24799806	CG13631	0.0517365327973104	0.0665093646335754
60	CrebB_+_+_(163r)	CrebB_+_+_(146g)	chr3R:29770126-29770626	kay	0.29133328779290535	0.1830436716767749
61	CrebB_+_+_(163r)	CrebB_+_+_(146g)	chr3R:29761628-29762128	kay	0.2780569424174306	0.1830436716767749
62	CrebB_+_+_(163r)	CrebB_+_+_(146g)	chr2R:6090627-6091127	Tbce	0.036125457741773004	0.0940837147944494
63	CrebB_+_+_(163r)	CrebB_+_+_(146g)	chr2R:15899120-15899620	bug	0.0378601055266899	0.0797124967607328
64	CrebB_+_+_(163r)	CrebB_+_+_(146g)	chrX:15079840-15080340	drd	0.06809344360739439	0.0539891117083445
65	CrebB_+_+_(163r)	CrebB_+_+_(146g)	chrX:8579839-8580339	CG12112	0.11117282319780782	0.1311396582869221
66	CrebB_+_+_(163r)	CrebB_+_+_(146g)	chrX:8536799-8537299	CG12112	0.11678966176223128	0.1311396582869221
67	CrebB_+_+_(163r)	CrebB_+_+_(146g)	chrX:8532492-8532992	CG12112	0.11417327746720903	0.1311396582869221
68	CrebB_+_+_(163r)	CrebB_+_+_(146g)	chr2R:9812981-9813481	CG1698	0.05699070960720049	0.0752792141409196
69	CrebB_+_+_(163r)	CrebB_+_+_(146g)	chr3L:16871553-16872053	CG13024	0.03313030603116585	0.0727365242023395
70	CrebB_+_+_(163r)	CrebB_+_+_(146g)	chr3L:715727-716227	CG13894	0.07280628440994065	0.0889084268470541
71	CrebB_+_+_(163r)	CrebB_+_+_(146g)	chr2L:13137009-13137509	Sirt1	0.03449022100358599	0.1254451558173343
72	CrebB_+_+_(163r)	CrebB_+_+_(146g)	chrX:3713732-3714232	Parg	0.03146061160786915	0.0909389918531157
73	CrebB_+_+_(163r)	CrebB_+_+_(146g)	chr3L:15140317-15140817	CG12316	0.039789804102814665	0.0764918615557881
74	CrebB_+_+_(163r)	CrebB_+_+_(146g)	chr2L:22541369-22541869	CG17490	0.03841239878684365	0.0751977130670517
75	CrebB_+_+_(163r)	CrebB_+_+_(146g)	chr2L:10745966-10746466	CG31869	0.3536348363512533	0.1489102171559461
76	CrebB_+_+_(163r)	CrebB_+_+_(146g)	chr3R:5249461-5249961	cno	0.07391950737824372	0.1506875715451215
77	CrebB_+_+_(163r)	CrebB_+_+_(146g)	chr3L:8549767-8550267	rhea	0.18509915553361841	0.1588377755115835
78	CrebB_+_+_(163r)	CrebB_+_+_(146g)	chrX:2085912-2086412	CG4281	0.04550945625339236	0.0887804300104556
79	CrebB_+_+_(163r)	CrebB_+_+_(146g)	chr3R:27593191-27593691	dsd	0.07926241172252298	0.1270154785750711
80	CrebB_+_+_(163r)	CrebB_+_+_(146g)	chr3R:27556851-27557351	dsd	0.07777180619449231	0.1270154785750711
81	CrebB_+_+_(163r)	CrebB_+_+_(146g)	chr2L:21209644-21210144	Ret	0.04975567056921057	0.0397564509293154
82	CrebB_+_+_(163r)	CrebB_+_+_(146g)	chr2R:24996452-24996952	CG30424	0.04270689582800146	0.0339865059865448
83	CrebB_+_+_(163r)	CrebB_+_+_(146g)	chr2R:25007132-25007632	CG30424	0.03351178266568316	0.0339865059865448
84	CrebB_+_+_(163r)	CrebB_+_+_(146g)	chrX:14493796-14494296	CG9411	0.16063520734526368	0.1016548615830314
85	CrebB_+_+_(163r)	CrebB_+_+_(146g)	chr2R:15808350-15808850	Zasp52	0.27761063649035356	0.1909622457902118
86	CrebB_+_+_(163r)	CrebB_+_+_(146g)	chr2R:15806388-15806888	Zasp52	0.2877659223497123	0.1909622457902118
87	CrebB_+_+_(163r)	CrebB_+_+_(146g)	chr2R:12381813-12382313	CG8839	0.0476269572839583	0.099984705506233
88	CrebB_+_+_(163r)	CrebB_+_+_(146g)	chr3L:2142934-2143434	sls	0.04095030489111668	0.0684403164518448
89	CrebB_+_+_(163r)	CrebB_+_+_(146g)	chr3R:21175757-21176257	CG3337	0.045572531098671216	0.065824619777203
90	CrebB_+_+_(163r)	CrebB_+_+_(146g)	chrX:12467550-12468050	CG42258	0.06920077568168248	0.1392070049309789
91	CrebB_+_+_(163r)	CrebB_+_+_(146g)	chrX:12473880-12474380	CG42258	0.04273246373623825	0.1392070049309789
92	CrebB_+_+_(163r)	CrebB_+_+_(146g)	chr3L:3270537-3271037	ZnT63C	0.07957829224436858	0.0962164323290541
93	CrebB_+_+_(163r)	CrebB_+_+_(146g)	chr3L:3347545-3348045	ZnT63C	0.04290947520590073	0.0962164323290541
94	CrebB_+_+_(163r)	CrebB_+_+_(146g)	chr2L:7090646-7091146	Pvf2	0.258635328537429	0.1277202229239792
95	CrebB_+_+_(163r)	CrebB_+_+_(146g)	chrX:18694289-18694789	Cyp18a1	0.08158759486833907	0.0758962195531931
96	CrebB_+_+_(163r)	CrebB_+_+_(146g)	chr2L:5111500-5112000	CG4230	0.037209743504330914	0.051117922584711
97	CrebB_+_+_(163r)	CrebB_+_+_(146g)	chrX:21306518-21307018	CG32521	0.1504722069036616	0.1438431315929427
98	CrebB_+_+_(163r)	CrebB_+_+_(146g)	chr3L:21177109-21177609	CG33056	0.05592976355395818	0.0783936816502
99	CrebB_+_+_(163r)	CrebB_+_+_(146g)	chr3L:21217104-21217604	CG33056	0.05572620923293032	0.0783936816502
100	CrebB_+_+_(163r)	CrebB_+_+_(146g)	chr2R:20581007-20581507	CG9945	0.03310856270765713	0.0721282713717923
101	CrebB_+_+_(163r)	CrebB_+_+_(146g)	chr2L:20858858-20859358	CG9336	0.3857862873398609	0.1481579290393
102	CrebB_+_+_(163r)	CrebB_+_+_(146g)	chr2L:20859718-20860218	CG9336	0.3937800968248864	0.1481579290393
103	CrebB_+_+_(163r)	CrebB_+_+_(146g)	chr2L:20907304-20907804	CG9336	0.30076342057729233	0.1481579290393
104	CrebB_+_+_(163r)	CrebB_+_+_(146g)	chr2L:20880348-20880848	CG9336	0.23191116560773775	0.1481579290393
105	CrebB_+_+_(163r)	CrebB_+_+_(146g)	chr3L:20538407-20538907	Rcd2	0.1519630308463524	0.0989322228414071
106	CrebB_+_+_(163r)	CrebB_+_+_(146g)	chr2L:7361417-7361917	wg	0.2444076702394872	0.093795743413302
107	CrebB_+_+_(163r)	CrebB_+_+_(146g)	chr3L:6756189-6756689	Ist1	0.08912721247507839	0.1421129770595376
108	CrebB_+_+_(163r)	CrebB_+_+_(146g)	chrX:20147875-20148375	AnxB10	0.07242144727261896	0.0668793101819803
109	CrebB_+_+_(163r)	CrebB_+_+_(146g)	chr3L:11532004-11532504	chrb	0.06404850639217537	0.1608368268137573
110	CrebB_+_+_(163r)	CrebB_+_+_(146g)	chr2L:10965890-10966390	Nup154	0.04709056766605338	0.1073572284854982
111	CrebB_+_+_(163r)	CrebB_+_+_(146g)	chrX:15079840-15080340	Lsd-2	0.16431378485184417	0.1086209171956014
112	CrebB_+_+_(163r)	CrebB_+_+_(146g)	chr2R:20581007-20581507	Hil	0.09549652312067036	0.1259822692767919
113	CrebB_+_+_(163r)	CrebB_+_+_(146g)	chr3R:17113714-17114214	cher	0.22344839830671218	0.2095840617545561
114	CrebB_+_+_(163r)	CrebB_+_+_(146g)	chr2R:24273822-24274322	nvy	0.18684075363752564	0.0588362866285306
115	CrebB_+_+_(163r)	CrebB_+_+_(146g)	chr2R:24678958-24679458	Mmp1	0.4145793333618055	0.1451434695665991
116	CrebB_+_+_(163r)	CrebB_+_+_(146g)	chr2L:11242490-11242990	cana	0.06919304315349356	0.1020243747385105
117	CrebB_+_+_(163r)	CrebB_+_+_(146g)	chr2R:7049430-7049930	Tsp42Ej	0.03484626230219973	0.0584874965057745
118	CrebB_+_+_(163r)	CrebB_+_+_(146g)	chr2L:21617185-21617685	Cul2	0.03133202612608856	0.110502647799535
119	CrebB_+_+_(163r)	CrebB_+_+_(146g)	chr2L:8164485-8164985	Piezo	0.20360354445173837	0.162191285102311
120	CrebB_+_+_(163r)	CrebB_+_+_(146g)	chr2L:8171620-8172120	Piezo	0.1681170804230783	0.162191285102311
121	CrebB_+_+_(163r)	CrebB_+_+_(146g)	chr3L:21177109-21177609	Ilk	0.0760977907641782	0.128307725681269
122	CrebB_+_+_(163r)	CrebB_+_+_(146g)	chr3L:21217104-21217604	Ilk	0.04327897845448952	0.128307725681269
123	CrebB_+_+_(163r)	CrebB_+_+_(146g)	chr3L:11532004-11532504	Mob2	0.14354684881180604	0.1548280051892464
124	CrebB_+_+_(163r)	CrebB_+_+_(146g)	chr3R:7214486-7214986	thw	0.09830726329405702	0.0633043677214841
125	CrebB_+_+_(163r)	CrebB_+_+_(146g)	chr3R:7188011-7188511	thw	0.06184673731442952	0.0633043677214841
126	CrebB_+_+_(163r)	CrebB_+_+_(146g)	chrX:11559898-11560398	rho-4	0.06957852708762154	0.1668147862845884
127	CrebB_+_+_(163r)	CrebB_+_+_(146g)	chr3L:16458554-16459054	TyrRS	0.05989164388767059	0.1444876723492145
128	CrebB_+_+_(163r)	CrebB_+_+_(146g)	chr2L:12054536-12055036	CG6766	0.03734134166007518	0.0917340666896241
129	CrebB_+_+_(163r)	CrebB_+_+_(146g)	chr2L:19537138-19537638	CG10337	0.06717825591088705	0.1107976700068307
130	CrebB_+_+_(163r)	CrebB_+_+_(146g)	chrX:13219053-13219553	Coq5	0.036257414751008535	0.0607928292713136
131	CrebB_+_+_(163r)	CrebB_+_+_(146g)	chr3L:13946013-13946513	CG32137	0.14117504210516557	0.1389574736890084
132	CrebB_+_+_(163r)	CrebB_+_+_(146g)	chr2L:12719264-12719764	CG15484	0.06441362355272598	0.0616905177482417
133	CrebB_+_+_(163r)	CrebB_+_+_(146g)	chr2L:1193455-1193955	CG4887	0.05532167845501129	0.0996630485108033
134	CrebB_+_+_(163r)	CrebB_+_+_(146g)	chr3R:21848395-21848895	CG34148	0.038941298242116215	0.0862785805045652
135	CrebB_+_+_(163r)	CrebB_+_+_(146g)	chr2R:6684061-6684561	Tdc2	0.18411417653205683	0.0898496612979388
136	CrebB_+_+_(163r)	CrebB_+_+_(146g)	chr2R:6681855-6682355	Tdc2	0.18305416913506023	0.0898496612979388
137	CrebB_+_+_(163r)	CrebB_+_+_(146g)	chr2L:1590086-1590586	haf	0.13353847836451402	0.0679429294145108
138	CrebB_+_+_(163r)	CrebB_+_+_(146g)	chr2L:14850221-14850721	CG15279	0.24423217397003383	0.0917469210333064
139	CrebB_+_+_(163r)	CrebB_+_+_(146g)	chr3L:11714193-11714693	CG14132	0.09172662501729753	0.0726102813320567
140	CrebB_+_+_(163r)	CrebB_+_+_(146g)	chr2L:5285692-5286192	vri	0.0976290966657844	0.111247838543828
141	CrebB_+_+_(163r)	CrebB_+_+_(146g)	chr3L:12139618-12140118	CAH2	0.031067121279117864	0.0468783347840828
142	CrebB_+_+_(163r)	CrebB_+_+_(146g)	chr2L:13269135-13269635	CG44085	0.39214116930520965	0.146734023512068
143	CrebB_+_+_(163r)	CrebB_+_+_(146g)	chrX:17691388-17691888	chas	0.11881008751484294	0.1435475624011196
144	CrebB_+_+_(163r)	CrebB_+_+_(146g)	chrX:17688462-17688962	chas	0.11758080718624199	0.1435475624011196
145	CrebB_+_+_(163r)	CrebB_+_+_(146g)	chr2R:22306818-22307318	T3dh	0.032919341974415685	0.0445215935151861
146	CrebB_+_+_(163r)	CrebB_+_+_(146g)	chr3L:1319853-1320353	sturkopf	0.08465393041636292	0.1207664342503992
147	CrebB_+_+_(163r)	CrebB_+_+_(146g)	chr2L:20807850-20808350	dia	0.15395231768633824	0.1486744853368315
148	CrebB_+_+_(163r)	CrebB_+_+_(146g)	chr2L:20808408-20808908	dia	0.12358185019698377	0.1486744853368315
149	CrebB_+_+_(163r)	CrebB_+_+_(146g)	chr3R:22048667-22049167	Fadd	0.03455948269651543	0.0660387906558496
150	CrebB_+_+_(163r)	CrebB_+_+_(146g)	chr3R:31411704-31412204	Gprk2	0.13361041596425974	0.1786056269553367
151	CrebB_+_+_(163r)	CrebB_+_+_(146g)	chr2L:1193455-1193955	l(2)10685	0.033855835230250424	0.0572829699333275
152	CrebB_+_+_(163r)	CrebB_+_+_(146g)	chr2R:6684061-6684561	Tdc1	0.2546479055037325	0.1166552503245689
153	CrebB_+_+_(163r)	CrebB_+_+_(146g)	chr2R:6681855-6682355	Tdc1	0.25135095938680746	0.1166552503245689
154	CrebB_+_+_(163r)	CrebB_+_+_(146g)	chr3R:27556851-27557351	Klp98A	0.1475756037469879	0.1273048499642512
155	CrebB_+_+_(163r)	CrebB_+_+_(146g)	chrX:18278904-18279404	upd1	0.2711162434960424	0.1134534621950249
156	CrebB_+_+_(163r)	CrebB_+_+_(146g)	chr3R:23051186-23051686	p53	0.04345723087768488	0.0916606345104036
157	CrebB_+_+_(163r)	CrebB_+_+_(146g)	chr3R:10095556-10096056	mtTFB2	0.04291272310910612	0.0609854829918453
158	CrebB_+_+_(163r)	CrebB_+_+_(146g)	chr2L:7145253-7145753	MICU1	0.03359657112714193	0.1116924882014817
159	CrebB_+_+_(163r)	CrebB_+_+_(146g)	chrX:5725607-5726107	CG42699	0.03578015940535372	0.0744313791802186
160	CrebB_+_+_(163r)	CrebB_+_+_(146g)	chr2R:7049430-7049930	Tsp42El	0.19493645317329986	0.1171724196308986
161	CrebB_+_+_(163r)	CrebB_+_+_(146g)	chr2R:22737913-22738413	CG42260	0.06585871600204897	0.0480729954367985
162	CrebB_+_+_(163r)	CrebB_+_+_(146g)	chr2L:21617185-21617685	CG2201	0.17160427464775713	0.0940900404616258
163	CrebB_+_+_(163r)	CrebB_+_+_(146g)	chrX:6649277-6649777	pigs	0.3471015594836729	0.1441138770778933
164	CrebB_+_+_(163r)	CrebB_+_+_(146g)	chr2L:11526488-11526988	CG31705	0.1700037613280736	0.0985670556023868
165	CrebB_+_+_(163r)	CrebB_+_+_(146g)	chr3R:19632557-19633057	subdued	0.12292869901801191	0.0869142897395965
166	CrebB_+_+_(163r)	CrebB_+_+_(146g)	chr3R:21175757-21176257	Trm7-34	0.03379399935071797	0.0555394504489711
167	CrebB_+_+_(163r)	CrebB_+_+_(146g)	chr2L:7492943-7493443	CG5973	0.05133071377035114	0.0704625407962053
168	CrebB_+_+_(163r)	CrebB_+_+_(146g)	chr2L:16857766-16858266	CG31809	0.031114955276379152	0.0410730510686852
169	CrebB_+_+_(163r)	CrebB_+_+_(146g)	chr2L:16885311-16885811	CG31809	0.032572195098709636	0.0410730510686852
170	CrebB_+_+_(163r)	CrebB_+_+_(146g)	chrX:8271303-8271803	sni	0.04922044172284392	0.1163338611563635
171	CrebB_+_+_(163r)	CrebB_+_+_(146g)	chrX:9075646-9076146	rdgA	0.16125217356597807	0.1699977074668581
172	CrebB_+_+_(163r)	CrebB_+_+_(146g)	chr3L:1353990-1354490	msd1	0.07546441174272116	0.0997730253452445
173	CrebB_+_+_(163r)	CrebB_+_+_(146g)	chr3R:30152061-30152561	CG31028	0.04517752915338871	0.1010311030330777
174	CrebB_+_+_(163r)	CrebB_+_+_(146g)	chr3L:13946013-13946513	Meics	0.03424386108135276	0.0952553960207745
175	CrebB_+_+_(163r)	CrebB_+_+_(146g)	chr2L:8164485-8164985	CG8353	0.030793449321199286	0.0454404546687585
176	CrebB_+_+_(163r)	CrebB_+_+_(146g)	chr2R:7270927-7271427	pwn	0.1579902065817024	0.1510942754766636
177	CrebB_+_+_(163r)	CrebB_+_+_(146g)	chr3L:22711361-22711861	l(3)04053	0.042464897298984665	0.070528118416004
178	CrebB_+_+_(163r)	CrebB_+_+_(146g)	chr2R:24593706-24594206	CG3548	0.04401169682775149	0.0730944766901671
179	CrebB_+_+_(163r)	CrebB_+_+_(146g)	chrX:16719534-16720034	CG34325	0.27205930157721114	0.1365289090639711
180	CrebB_+_+_(163r)	CrebB_+_+_(146g)	chr2R:6867453-6867953	Spn42De	0.05201892138016352	0.0673727649621549
181	CrebB_+_+_(163r)	CrebB_+_+_(146g)	chrX:1511985-1512485	CG14795	0.07232510477356649	0.046088634084519
182	CrebB_+_+_(163r)	CrebB_+_+_(146g)	chr2L:47002-47502	Cda5	0.15001377392181936	0.0495854149549977
183	CrebB_+_+_(163r)	CrebB_+_+_(146g)	chr3L:2142934-2143434	CG5704	0.0366364217528462	0.0528098372588332
184	CrebB_+_+_(163r)	CrebB_+_+_(146g)	chr3L:4188053-4188553	CG43367	0.032920839757282945	0.0802099917525409
185	CrebB_+_+_(163r)	CrebB_+_+_(146g)	chr2L:19120548-19121048	amd	0.03941243584530043	0.1051426877752699
186	CrebB_+_+_(163r)	CrebB_+_+_(146g)	chr2R:22649538-22650038	CG34445	0.05390148275098409	0.0471754823702339
187	CrebB_+_+_(163r)	CrebB_+_+_(146g)	chr2L:3686829-3687329	CG2818	0.03825772105628241	0.1006781547971955
188	CrebB_+_+_(163r)	CrebB_+_+_(146g)	chrX:1842862-1843362	prage	0.33964464708783565	0.1617818362405075
189	CrebB_+_+_(163r)	CrebB_+_+_(146g)	chrX:21306518-21307018	ABCA	0.06261194267273114	0.0599847468554209
190	CrebB_+_+_(163r)	CrebB_+_+_(146g)	chr2L:6423223-6423723	Tig	0.25928386896911093	0.0906661289056776
191	CrebB_+_+_(163r)	CrebB_+_+_(146g)	chr2R:21073582-21074082	CG10527	0.37187819052281723	0.2020774835876175
192	CrebB_+_+_(163r)	CrebB_+_+_(146g)	chr3R:21848395-21848895	glec	0.0595142426607016	0.1190483256020521
193	CrebB_+_+_(163r)	CrebB_+_+_(146g)	chr2L:9493214-9493714	numb	0.10239876268946797	0.2030539064404185
0	Dll_+_+_(52r)	Dll_+_+_(49g)	chr2R:18272353-18272853	fj	0.37222729331770993	0.3018900503296879
1	Dll_+_+_(52r)	Dll_+_+_(49g)	chr2R:18242831-18243331	fj	0.380022923331235	0.3018900503296879
2	Dll_+_+_(52r)	Dll_+_+_(49g)	chr2R:18200168-18200668	fj	0.15309183010365604	0.3018900503296879
3	Dll_+_+_(52r)	Dll_+_+_(49g)	chr2R:18240747-18241247	fj	0.32740115224353816	0.3018900503296879
4	Dll_+_+_(52r)	Dll_+_+_(49g)	chr3L:7517883-7518383	ltl	0.2505385906776371	0.2068445343056397
5	Dll_+_+_(52r)	Dll_+_+_(49g)	chr3L:7518528-7519028	ltl	0.24785116744048596	0.2068445343056397
6	Dll_+_+_(52r)	Dll_+_+_(49g)	chr2L:10053782-10054282	obst-B	0.03447472226480279	0.1065110863126843
7	Dll_+_+_(52r)	Dll_+_+_(49g)	chr2L:21059261-21059761	CG42238	0.22094993386480216	0.240175897833561
8	Dll_+_+_(52r)	Dll_+_+_(49g)	chr2R:11543583-11544083	en	0.16344395943912302	0.1233938560697821
9	Dll_+_+_(52r)	Dll_+_+_(49g)	chr2R:11570997-11571497	en	0.14793775756156324	0.1233938560697821
10	Dll_+_+_(52r)	Dll_+_+_(49g)	chr2L:370799-371299	al	0.168746707688837	0.158530914443918
11	Dll_+_+_(52r)	Dll_+_+_(49g)	chr3R:12642323-12642823	Dtg	0.22023528463835587	0.199138728773429
12	Dll_+_+_(52r)	Dll_+_+_(49g)	chr2L:12640253-12640753	pdm2	0.25825401188291264	0.2296294387718192
13	Dll_+_+_(52r)	Dll_+_+_(49g)	chr2L:12657512-12658012	pdm2	0.3301290886205912	0.2296294387718192
14	Dll_+_+_(52r)	Dll_+_+_(49g)	chr3L:6315820-6316320	CG13300	0.11558254698156863	0.2682497207653206
15	Dll_+_+_(52r)	Dll_+_+_(49g)	chr2L:12640253-12640753	nub	0.37525345081754946	0.2878610598284843
16	Dll_+_+_(52r)	Dll_+_+_(49g)	chr2L:12657512-12658012	nub	0.5125291213780951	0.2878610598284843
17	Dll_+_+_(52r)	Dll_+_+_(49g)	chr2R:7084218-7084718	esn	0.30663588289939636	0.202574005996775
18	Dll_+_+_(52r)	Dll_+_+_(49g)	chr3R:25736396-25736896	LpR2	0.20829919107588019	0.2521637846000875
19	Dll_+_+_(52r)	Dll_+_+_(49g)	chr3R:19070130-19070630	gukh	0.1038652661190523	0.2043190688548089
20	Dll_+_+_(52r)	Dll_+_+_(49g)	chr2R:8994532-8995032	Np	0.2159446507907427	0.2466261170937329
21	Dll_+_+_(52r)	Dll_+_+_(49g)	chr3L:10933723-10934223	klu	0.33096658387028066	0.263047045541799
22	Dll_+_+_(52r)	Dll_+_+_(49g)	chr2L:14256337-14256837	Dyrk2	0.13013862801606305	0.1712733020457919
23	Dll_+_+_(52r)	Dll_+_+_(49g)	chr3R:17817493-17817993	tinc	0.24659839546581055	0.1451715523594119
24	Dll_+_+_(52r)	Dll_+_+_(49g)	chr2R:25002967-25003467	emp	0.17704499512177796	0.1502938561346772
25	Dll_+_+_(52r)	Dll_+_+_(49g)	chr2R:12914876-12915376	vg	0.2810225627615878	0.3929216373902303
26	Dll_+_+_(52r)	Dll_+_+_(49g)	chr2L:14256337-14256837	wb	0.09781497858963625	0.1884708058046247
27	Dll_+_+_(52r)	Dll_+_+_(49g)	chrX:4399550-4400050	bi	0.5612498610290972	0.1538359094624106
28	Dll_+_+_(52r)	Dll_+_+_(49g)	chrX:4474134-4474634	bi	0.5897374939681835	0.1538359094624106
29	Dll_+_+_(52r)	Dll_+_+_(49g)	chrX:13542102-13542602	Tpst	0.07786741755496722	0.0969123265044799
30	Dll_+_+_(52r)	Dll_+_+_(49g)	chr3L:13181949-13182449	caps	0.2800558765426452	0.2456144978406774
31	Dll_+_+_(52r)	Dll_+_+_(49g)	chr2L:8028146-8028646	Spn28Dc	0.07717632689186484	0.0993487395937959
32	Dll_+_+_(52r)	Dll_+_+_(49g)	chr2L:4376982-4377482	Atet	0.04620892768749578	0.1053602324372594
33	Dll_+_+_(52r)	Dll_+_+_(49g)	chr2L:4354119-4354619	Atet	0.04273483594781931	0.1053602324372594
34	Dll_+_+_(52r)	Dll_+_+_(49g)	chrX:783510-784010	fz3	0.3278082447386419	0.1365556312529464
35	Dll_+_+_(52r)	Dll_+_+_(49g)	chr2R:8024103-8024603	Optix	0.14802296883262628	0.1445619566872771
36	Dll_+_+_(52r)	Dll_+_+_(49g)	chr3L:6794789-6795289	vvl	0.4454145414144485	0.116151765010091
37	Dll_+_+_(52r)	Dll_+_+_(49g)	chr3L:12701839-12702339	Ptp69D	0.04973235572904733	0.09276652411536
38	Dll_+_+_(52r)	Dll_+_+_(49g)	chr3R:14685062-14685562	Meltrin	0.13661693567792105	0.2227457412522067
39	Dll_+_+_(52r)	Dll_+_+_(49g)	chr2R:22156340-22156840	a	0.08055916326895335	0.0944786231123166
40	Dll_+_+_(52r)	Dll_+_+_(49g)	chr3L:5957530-5958030	CG33993	0.12071263100907917	0.0890999331102139
41	Dll_+_+_(52r)	Dll_+_+_(49g)	chr2L:8028146-8028646	Megf8	0.03451646011998261	0.0601765463048707
42	Dll_+_+_(52r)	Dll_+_+_(49g)	chr3R:16354704-16355204	CG10311	0.16428427330348885	0.1547106079246374
43	Dll_+_+_(52r)	Dll_+_+_(49g)	chr3L:4158054-4158554	nab	0.2389347829634459	0.1170911590694628
44	Dll_+_+_(52r)	Dll_+_+_(49g)	chrX:18541190-18541690	Bx	0.4032909265141256	0.2507012608546932
45	Dll_+_+_(52r)	Dll_+_+_(49g)	chrX:18544053-18544553	Bx	0.37294888768220896	0.2507012608546932
46	Dll_+_+_(52r)	Dll_+_+_(49g)	chr2R:9498428-9498928	brp	0.08973206904393664	0.102616715046155
47	Dll_+_+_(52r)	Dll_+_+_(49g)	chr3L:382269-382769	trh	0.24317260301624474	0.2164893600639474
48	Dll_+_+_(52r)	Dll_+_+_(49g)	chr3L:416431-416931	trh	0.2208281863889832	0.2164893600639474
49	Dll_+_+_(52r)	Dll_+_+_(49g)	chr3L:6472939-6473439	CG42747	0.09765167207610226	0.2776137896311914
50	Dll_+_+_(52r)	Dll_+_+_(49g)	chr3L:6471458-6471958	CG42747	0.11425821275068475	0.2776137896311914
51	Dll_+_+_(52r)	Dll_+_+_(49g)	chr3L:959445-959945	CG12038	0.05032032559267224	0.0602693637108793
52	Dll_+_+_(52r)	Dll_+_+_(49g)	chr2L:10053782-10054282	Cpr31A	0.109951534296901	0.1808592925703092
53	Dll_+_+_(52r)	Dll_+_+_(49g)	chr3R:19333575-19334075	Dl	0.33601759630759587	0.2545868262121436
54	Dll_+_+_(52r)	Dll_+_+_(49g)	chr3R:19287498-19287998	Dl	0.320523530769584	0.2545868262121436
55	Dll_+_+_(52r)	Dll_+_+_(49g)	chr3L:4158054-4158554	mas	0.07838070320209087	0.1422685095303538
56	Dll_+_+_(52r)	Dll_+_+_(49g)	chr2R:9498428-9498928	Wnt2	0.17679325521456635	0.1633526716853501
57	Dll_+_+_(52r)	Dll_+_+_(49g)	chr2L:8028146-8028646	CG7367	0.13712340978826265	0.1689707011943007
58	Dll_+_+_(52r)	Dll_+_+_(49g)	chr2R:14784327-14784827	kn	0.23228416169181046	0.1204703481051192
59	Dll_+_+_(52r)	Dll_+_+_(49g)	chr3L:5611867-5612367	Blimp-1	0.4153238591491599	0.2372196496029562
60	Dll_+_+_(52r)	Dll_+_+_(49g)	chr2L:8028146-8028646	MED20	0.039046415688686824	0.0610965731773394
61	Dll_+_+_(52r)	Dll_+_+_(49g)	chr3L:382269-382769	mthl10	0.10277749203140688	0.1290153322808641
0	Dr_+_+_(61r)	Dr_+_+_(66g)	chr2R:21301419-21301919	CG9752	0.031592419491602845	0.1332626672910325
1	Dr_+_+_(61r)	Dr_+_+_(66g)	chr2R:9067727-9068227	CG8170	0.09213886281625945	0.049807655573719
2	Dr_+_+_(61r)	Dr_+_+_(66g)	chr3L:13168075-13168575	trn	0.31837501399507956	0.1950794846884354
3	Dr_+_+_(61r)	Dr_+_+_(66g)	chr2R:15881808-15882308	tun	0.0447527644571484	0.1374356991171353
4	Dr_+_+_(61r)	Dr_+_+_(66g)	chr2R:15838085-15838585	tun	0.08672761038682822	0.1374356991171353
5	Dr_+_+_(61r)	Dr_+_+_(66g)	chr2L:8919267-8919767	CG34398	0.23385007982934292	0.2093134518295681
6	Dr_+_+_(61r)	Dr_+_+_(66g)	chr3L:5863090-5863590	vn	0.15547612365386365	0.1648493685782648
7	Dr_+_+_(61r)	Dr_+_+_(66g)	chr2R:15881808-15882308	Rif1	0.040510307321285126	0.0798273214812081
8	Dr_+_+_(61r)	Dr_+_+_(66g)	chr2R:15838085-15838585	Rif1	0.045351596860522286	0.0798273214812081
9	Dr_+_+_(61r)	Dr_+_+_(66g)	chr2L:19454852-19455352	Hs2st	0.06248394982726281	0.0954083926824939
10	Dr_+_+_(61r)	Dr_+_+_(66g)	chr3L:385374-385874	mthl10	0.06772340913821526	0.137244076192756
11	Dr_+_+_(61r)	Dr_+_+_(66g)	chr3L:382269-382769	mthl10	0.10277749203140688	0.137244076192756
12	Dr_+_+_(61r)	Dr_+_+_(66g)	chr3L:6794789-6795289	vvl	0.4454145414144485	0.2353746517516755
13	Dr_+_+_(61r)	Dr_+_+_(66g)	chr3L:17501819-17502319	Oatp74D	0.08336209483529751	0.1285677341331633
14	Dr_+_+_(61r)	Dr_+_+_(66g)	chr3L:6472939-6473439	CG42747	0.09765167207610226	0.1651579668065136
15	Dr_+_+_(61r)	Dr_+_+_(66g)	chr3L:6471458-6471958	CG42747	0.11425821275068475	0.1651579668065136
16	Dr_+_+_(61r)	Dr_+_+_(66g)	chr2L:4354119-4354619	tutl	0.13224740637486282	0.2296971370831017
17	Dr_+_+_(61r)	Dr_+_+_(66g)	chr3R:25459971-25460471	XNP	0.07143696334876083	0.2178391783162025
18	Dr_+_+_(61r)	Dr_+_+_(66g)	chr2R:24825460-24825960	CG16896	0.03980940339000467	0.0858362240692686
19	Dr_+_+_(61r)	Dr_+_+_(66g)	chr2R:14784327-14784827	Spred	0.05784088123604674	0.1808340063080061
20	Dr_+_+_(61r)	Dr_+_+_(66g)	chr3R:25736396-25736896	LpR1	0.06864251791892634	0.10328630409397
21	Dr_+_+_(61r)	Dr_+_+_(66g)	chr3R:14281405-14281905	PR-Set7	0.07802223245294047	0.1448714911072199
22	Dr_+_+_(61r)	Dr_+_+_(66g)	chr2R:12015229-12015729	otk	0.05817868755379117	0.090060670117515
23	Dr_+_+_(61r)	Dr_+_+_(66g)	chr2R:8024103-8024603	Nup44A	0.08337386227577255	0.13229481159237
24	Dr_+_+_(61r)	Dr_+_+_(66g)	chr3L:10933723-10934223	klu	0.33096658387028066	0.0879520544306549
25	Dr_+_+_(61r)	Dr_+_+_(66g)	chr2R:9067727-9068227	Vang	0.0808886069520472	0.2086527504272569
26	Dr_+_+_(61r)	Dr_+_+_(66g)	chrX:4399550-4400050	bi	0.5612498610290972	0.1344675741329418
27	Dr_+_+_(61r)	Dr_+_+_(66g)	chrX:4474134-4474634	bi	0.5897374939681835	0.1344675741329418
28	Dr_+_+_(61r)	Dr_+_+_(66g)	chr2R:7097052-7097552	esn	0.2744670822685786	0.039253653624481
29	Dr_+_+_(61r)	Dr_+_+_(66g)	chr2R:12914876-12915376	CG17019	0.05025374316609402	0.100242144146373
30	Dr_+_+_(61r)	Dr_+_+_(66g)	chr3R:11941920-11942420	CG31211	0.1051166046075162	0.1495969355211781
31	Dr_+_+_(61r)	Dr_+_+_(66g)	chr2L:7869383-7869883	CG7115	0.07115279195379055	0.1380341641082502
32	Dr_+_+_(61r)	Dr_+_+_(66g)	chr2R:8024103-8024603	CG17977	0.06770867696498088	0.1283663411795541
33	Dr_+_+_(61r)	Dr_+_+_(66g)	chr3R:23147745-23148245	hh	0.27644472095026795	0.041519701859875
34	Dr_+_+_(61r)	Dr_+_+_(66g)	chr2L:14427592-14428092	elB	0.2752960617675659	0.2173221413671515
35	Dr_+_+_(61r)	Dr_+_+_(66g)	chr3L:1458360-1458860	rho	0.05842646555726393	0.05867284196575
36	Dr_+_+_(61r)	Dr_+_+_(66g)	chr3L:1417766-1418266	rho	0.09842966669759133	0.05867284196575
37	Dr_+_+_(61r)	Dr_+_+_(66g)	chr2L:370799-371299	Plc21C	0.060443147761774126	0.1049002976781826
38	Dr_+_+_(61r)	Dr_+_+_(66g)	chr2L:386137-386637	Plc21C	0.06765942780181734	0.1049002976781826
39	Dr_+_+_(61r)	Dr_+_+_(66g)	chr2R:8057509-8058009	slv	0.08639908677594095	0.1065152976753006
40	Dr_+_+_(61r)	Dr_+_+_(66g)	chr2L:8028146-8028646	CG7231	0.03497939602853638	0.0448633044179446
41	Dr_+_+_(61r)	Dr_+_+_(66g)	chr3R:12642323-12642823	Dtg	0.22023528463835587	0.1153584640669423
42	Dr_+_+_(61r)	Dr_+_+_(66g)	chr3R:14387406-14387906	HEATR2	0.036006893497240476	0.0790635785855268
43	Dr_+_+_(61r)	Dr_+_+_(66g)	chr3R:14347430-14347930	HEATR2	0.04393771822834124	0.0790635785855268
44	Dr_+_+_(61r)	Dr_+_+_(66g)	chr3L:6924809-6925309	sgl	0.10454704112553401	0.0894203100461159
45	Dr_+_+_(61r)	Dr_+_+_(66g)	chr2R:25002967-25003467	zip	0.2603793320898686	0.145363712924143
46	Dr_+_+_(61r)	Dr_+_+_(66g)	chr2L:423605-424105	MED15	0.03829457323661419	0.0933504091971276
47	Dr_+_+_(61r)	Dr_+_+_(66g)	chr2L:14256337-14256837	Dyrk2	0.13013862801606305	0.1141878699364431
48	Dr_+_+_(61r)	Dr_+_+_(66g)	chr2R:12914876-12915376	vg	0.2810225627615878	0.0346072681786001
49	Dr_+_+_(61r)	Dr_+_+_(66g)	chr2R:21301419-21301919	CG30394	0.04124012981923896	0.0886773408722174
50	Dr_+_+_(61r)	Dr_+_+_(66g)	chr2R:16715620-16716120	Pgant9	0.17070042569884386	0.1208549387538325
51	Dr_+_+_(61r)	Dr_+_+_(66g)	chr2L:8028146-8028646	pes	0.031091004806362885	0.0531567875473429
52	Dr_+_+_(61r)	Dr_+_+_(66g)	chr2R:22156340-22156840	a	0.08055916326895335	0.1087754952166573
53	Dr_+_+_(61r)	Dr_+_+_(66g)	chrX:18621566-18622066	Rip11	0.047159150407236956	0.1408599699708055
54	Dr_+_+_(61r)	Dr_+_+_(66g)	chr2L:8028146-8028646	Megf8	0.03451646011998261	0.0838042103932358
55	Dr_+_+_(61r)	Dr_+_+_(66g)	chr3R:19333575-19334075	Ino80	0.05909315480594998	0.1630962687623707
56	Dr_+_+_(61r)	Dr_+_+_(66g)	chr3R:19333575-19334075	Dl	0.33601759630759587	0.1040770812133475
57	Dr_+_+_(61r)	Dr_+_+_(66g)	chr3R:19287498-19287998	Dl	0.320523530769584	0.1040770812133475
58	Dr_+_+_(61r)	Dr_+_+_(66g)	chr2L:370799-371299	Ent1	0.053561603465758764	0.1023347730071564
59	Dr_+_+_(61r)	Dr_+_+_(66g)	chr2L:386137-386637	Ent1	0.05961157717246065	0.1023347730071564
60	Dr_+_+_(61r)	Dr_+_+_(66g)	chrX:18541190-18541690	Wnt5	0.08475500308655178	0.1795807252133136
61	Dr_+_+_(61r)	Dr_+_+_(66g)	chr3L:6315820-6316320	CG13300	0.11558254698156863	0.2054931825662824
62	Dr_+_+_(61r)	Dr_+_+_(66g)	chr3R:17817493-17817993	tinc	0.24659839546581055	0.1015733086503919
63	Dr_+_+_(61r)	Dr_+_+_(66g)	chr2L:423605-424105	RpI135	0.04517986518865427	0.0601662813432768
64	Dr_+_+_(61r)	Dr_+_+_(66g)	chrX:13241291-13241791	mew	0.1671067547408417	0.2262371225208707
65	Dr_+_+_(61r)	Dr_+_+_(66g)	chrX:13303801-13304301	mew	0.08921959675238735	0.2262371225208707
66	Dr_+_+_(61r)	Dr_+_+_(66g)	chr3R:11941920-11942420	GC1	0.04717122993240029	0.1016669471760008
67	Dr_+_+_(61r)	Dr_+_+_(66g)	chr3L:22182676-22183176	olf413	0.13270589788826814	0.169417621800215
68	Dr_+_+_(61r)	Dr_+_+_(66g)	chr3R:25459971-25460471	Fur1	0.15823466255345076	0.2035373105404207
69	Dr_+_+_(61r)	Dr_+_+_(66g)	chr2R:14784327-14784827	ave	0.03647499066175242	0.0783756164557836
70	Dr_+_+_(61r)	Dr_+_+_(66g)	chr3R:29277435-29277935	SP1029	0.13600156262011068	0.0646996258512528
71	Dr_+_+_(61r)	Dr_+_+_(66g)	chr3R:29520618-29521118	Trc8	0.04584292327200193	0.1549059297534573
72	Dr_+_+_(61r)	Dr_+_+_(66g)	chr2L:15377041-15377541	esg	0.10042819437150569	0.1656830755292663
73	Dr_+_+_(61r)	Dr_+_+_(66g)	chr2L:8285536-8286036	strat	0.03431477619015158	0.1369038685618526
74	Dr_+_+_(61r)	Dr_+_+_(66g)	chr2L:8028146-8028646	Trf	0.03466580504164292	0.1171824964056214
75	Dr_+_+_(61r)	Dr_+_+_(66g)	chr3L:4158054-4158554	mas	0.07838070320209087	0.1007578046443607
76	Dr_+_+_(61r)	Dr_+_+_(66g)	chr3R:5244869-5245369	Mms19	0.0388085688568008	0.1195040286883786
0	E5_+_+_(41r)	E5_+_+_(34g)	chr2R:24082349-24082849	CG3253	0.033456971314968074	0.0755803884980157
1	E5_+_+_(41r)	E5_+_+_(34g)	chr3L:20706842-20707342	kni	0.08694096453080864	0.0999160829732425
2	E5_+_+_(41r)	E5_+_+_(34g)	chr2R:15881808-15882308	Poxn	0.12102916655539378	0.0473379609438591
3	E5_+_+_(41r)	E5_+_+_(34g)	chr2R:15838085-15838585	Poxn	0.11655928144259912	0.0473379609438591
4	E5_+_+_(41r)	E5_+_+_(34g)	chr2R:15825609-15826109	Poxn	0.13766116968571518	0.0473379609438591
5	E5_+_+_(41r)	E5_+_+_(34g)	chr2R:15842920-15843420	Poxn	0.10577735739289164	0.0473379609438591
6	E5_+_+_(41r)	E5_+_+_(34g)	chr2R:15823692-15824192	Poxn	0.13546451147127364	0.0473379609438591
7	E5_+_+_(41r)	E5_+_+_(34g)	chr2R:16706651-16707151	Pgant9	0.17155373798441237	0.1243541135072505
8	E5_+_+_(41r)	E5_+_+_(34g)	chr2R:16715620-16716120	Pgant9	0.17070042569884386	0.1243541135072505
9	E5_+_+_(41r)	E5_+_+_(34g)	chr3R:11941920-11942420	CG12213	0.08322941304779831	0.1047499276393069
10	E5_+_+_(41r)	E5_+_+_(34g)	chrX:13542102-13542602	Cpr12A	0.12556161348833525	0.1159367775852282
11	E5_+_+_(41r)	E5_+_+_(34g)	chr3L:6315820-6316320	CG13300	0.11558254698156863	0.1830374688323373
12	E5_+_+_(41r)	E5_+_+_(34g)	chr3L:6391760-6392260	CG13300	0.19042454474977685	0.1830374688323373
13	E5_+_+_(41r)	E5_+_+_(34g)	chr3L:13168075-13168575	trn	0.31837501399507956	0.2044738948540791
14	E5_+_+_(41r)	E5_+_+_(34g)	chr2R:11695354-11695854	pyr	0.3040839486771238	0.1125517340369993
15	E5_+_+_(41r)	E5_+_+_(34g)	chr2R:24825460-24825960	Dll	0.29197620161943505	0.1553639820771123
16	E5_+_+_(41r)	E5_+_+_(34g)	chr2R:24868819-24869319	Dll	0.2936130288725933	0.1553639820771123
17	E5_+_+_(41r)	E5_+_+_(34g)	chr2R:24840962-24841462	Dll	0.3106657222516966	0.1553639820771123
18	E5_+_+_(41r)	E5_+_+_(34g)	chr2R:24818721-24819221	Dll	0.27703074183152887	0.1553639820771123
19	E5_+_+_(41r)	E5_+_+_(34g)	chr2R:23243482-23243982	side-V	0.26014144286267915	0.1269538650323471
20	E5_+_+_(41r)	E5_+_+_(34g)	chr3R:17817493-17817993	tinc	0.24659839546581055	0.1834418292297297
21	E5_+_+_(41r)	E5_+_+_(34g)	chr2R:14784327-14784827	CG10205	0.04020053220001601	0.060560792261851
22	E5_+_+_(41r)	E5_+_+_(34g)	chr2L:8919267-8919767	CG34398	0.23385007982934292	0.1625792350809181
23	E5_+_+_(41r)	E5_+_+_(34g)	chr2R:12914876-12915376	vg	0.2810225627615878	0.141076152786902
24	E5_+_+_(41r)	E5_+_+_(34g)	chr2R:24373131-24373631	Slik	0.04178370299075385	0.076962653986703
25	E5_+_+_(41r)	E5_+_+_(34g)	chr2L:11959467-11959967	Qtzl	0.03974673485261165	0.0508076306252213
26	E5_+_+_(41r)	E5_+_+_(34g)	chr3R:7442090-7442590	CG14598	0.2137605628978336	0.1708739036380998
27	E5_+_+_(41r)	E5_+_+_(34g)	chr3L:6391760-6392260	CG42747	0.146094212411348	0.1862390126394056
28	E5_+_+_(41r)	E5_+_+_(34g)	chr3L:6472939-6473439	CG42747	0.09765167207610226	0.1862390126394056
29	E5_+_+_(41r)	E5_+_+_(34g)	chr3L:6471458-6471958	CG42747	0.11425821275068475	0.1862390126394056
30	E5_+_+_(41r)	E5_+_+_(34g)	chr3L:13181949-13182449	caps	0.2800558765426452	0.2026636932201181
31	E5_+_+_(41r)	E5_+_+_(34g)	chr3R:13934226-13934726	ems	0.06068565735766842	0.4831740369654124
32	E5_+_+_(41r)	E5_+_+_(34g)	chr2R:12914876-12915376	CG17019	0.05025374316609402	0.0556599442935614
33	E5_+_+_(41r)	E5_+_+_(34g)	chr3L:10913488-10913988	tna	0.27303587511959904	0.196662068886449
34	E5_+_+_(41r)	E5_+_+_(34g)	chr3L:1093410-1093910	bab2	0.12470975171519305	0.0571014115566577
35	E5_+_+_(41r)	E5_+_+_(34g)	chr2L:13820021-13820521	PolG1	0.03524077603780979	0.0330519847894147
36	E5_+_+_(41r)	E5_+_+_(34g)	chr3R:13416452-13416952	yellow-e	0.07901888401011965	0.085621893264684
37	E5_+_+_(41r)	E5_+_+_(34g)	chr2L:11074986-11075486	l(2)gd1	0.031156990186521672	0.0575598630309009
38	E5_+_+_(41r)	E5_+_+_(34g)	chrX:2147866-2148366	wapl	0.052258642033569815	0.0462735430909211
39	E5_+_+_(41r)	E5_+_+_(34g)	chr3R:13416452-13416952	yellow-e2	0.07148605577171996	0.1293465339353858
40	E5_+_+_(41r)	E5_+_+_(34g)	chr3R:16110877-16111377	Mhcl	0.0487232973371896	0.0706449283888794
41	E5_+_+_(41r)	E5_+_+_(34g)	chr3L:16285883-16286383	CG13064	0.03542061868693433	0.0366473117687905
42	E5_+_+_(41r)	E5_+_+_(34g)	chr2L:14607405-14607905	osp	0.15809073426003717	0.1165426593476485
43	E5_+_+_(41r)	E5_+_+_(34g)	chr2R:14784327-14784827	kn	0.23228416169181046	0.0651935977035404
44	E5_+_+_(41r)	E5_+_+_(34g)	chr3R:16117487-16117987	Sb	0.34007848841479493	0.0888913551770189
0	EcR_+_+_(52r)	EcR_+_+_(71g)	chr2R:13498016-13498516	drk	0.14866674908327673	0.2989058070268106
1	EcR_+_+_(52r)	EcR_+_+_(71g)	chr2L:7416759-7417259	CG5149	0.06522137508752612	0.185074840087277
2	EcR_+_+_(52r)	EcR_+_+_(71g)	chr3L:16820673-16821173	Lmpt	0.17050998828361325	0.3047010382266731
3	EcR_+_+_(52r)	EcR_+_+_(71g)	chr3R:14064043-14064543	rdx	0.0951941300232939	0.3671785394749469
4	EcR_+_+_(52r)	EcR_+_+_(71g)	chr3L:3778872-3779372	CG32264	0.1360350171067432	0.3755352622494785
5	EcR_+_+_(52r)	EcR_+_+_(71g)	chr2L:7416759-7417259	CG5973	0.041649531155152186	0.1482284240117436
6	EcR_+_+_(52r)	EcR_+_+_(71g)	chr2R:21507496-21507996	MESK2	0.05559954612537853	0.2996790668996091
7	EcR_+_+_(52r)	EcR_+_+_(71g)	chr2R:24065434-24065934	EbpIII	0.03459338120475661	0.1259858308880238
8	EcR_+_+_(52r)	EcR_+_+_(71g)	chr2R:21937091-21937591	CG9304	0.04570876626154076	0.1652106969886518
9	EcR_+_+_(52r)	EcR_+_+_(71g)	chr2R:18217518-18218018	CG5721	0.08657666148343379	0.2207026106793161
10	EcR_+_+_(52r)	EcR_+_+_(71g)	chr2R:25002967-25003467	CG2765	0.1985864431963947	0.2754075628701971
11	EcR_+_+_(52r)	EcR_+_+_(71g)	chr2R:25004843-25005343	CG2765	0.20155333068437495	0.2754075628701971
12	EcR_+_+_(52r)	EcR_+_+_(71g)	chr2L:17445657-17446157	BicD	0.08501626277787264	0.2764649028554087
13	EcR_+_+_(52r)	EcR_+_+_(71g)	chr2R:22303918-22304418	wdp	0.1311069871159828	0.1968047145471519
14	EcR_+_+_(52r)	EcR_+_+_(71g)	chr2R:11061829-11062329	luna	0.269170395882719	0.2972117279813004
15	EcR_+_+_(52r)	EcR_+_+_(71g)	chr2R:9129023-9129523	alc	0.05231709971434313	0.2026978622351135
16	EcR_+_+_(52r)	EcR_+_+_(71g)	chr2R:25004843-25005343	uzip	0.13322681709280318	0.2483942810997222
17	EcR_+_+_(52r)	EcR_+_+_(71g)	chr2R:7045589-7046089	CG43646	0.039425823784360575	0.0463206117784767
18	EcR_+_+_(52r)	EcR_+_+_(71g)	chr3L:3300096-3300596	ckd	0.055264440223634824	0.2418773443441158
19	EcR_+_+_(52r)	EcR_+_+_(71g)	chr2R:24065434-24065934	sei	0.03115605544813372	0.1497318641165129
20	EcR_+_+_(52r)	EcR_+_+_(71g)	chr3R:19909180-19909680	RhoGAP92B	0.051390430736201025	0.131440216721207
21	EcR_+_+_(52r)	EcR_+_+_(71g)	chr3L:4224082-4224582	CG43367	0.05519007818717362	0.113897942261541
22	EcR_+_+_(52r)	EcR_+_+_(71g)	chr2R:21069944-21070444	CG10527	0.388907196247141	0.2143308160244418
23	EcR_+_+_(52r)	EcR_+_+_(71g)	chr2R:9673555-9674055	Mmp2	0.20321799075074778	0.1051641961461428
24	EcR_+_+_(52r)	EcR_+_+_(71g)	chr2R:9674340-9674840	Mmp2	0.2027358815934027	0.1051641961461428
25	EcR_+_+_(52r)	EcR_+_+_(71g)	chr3L:2804163-2804663	Mrtf	0.07118851981923918	0.2572757331809594
26	EcR_+_+_(52r)	EcR_+_+_(71g)	chr3R:26063705-26064205	Cmpk	0.0940825620554112	0.2750953791349639
27	EcR_+_+_(52r)	EcR_+_+_(71g)	chr2R:22388402-22388902	babos	0.23196023280516898	0.1892899141631388
28	EcR_+_+_(52r)	EcR_+_+_(71g)	chr2L:17445657-17446157	dl	0.18481072934610226	0.2407720030993426
29	EcR_+_+_(52r)	EcR_+_+_(71g)	chr2R:25002967-25003467	emp	0.17704499512177796	0.241200500184806
30	EcR_+_+_(52r)	EcR_+_+_(71g)	chr2R:10853766-10854266	Taf5	0.03168135506440437	0.1502545875781852
31	EcR_+_+_(52r)	EcR_+_+_(71g)	chr3R:14687172-14687672	kibra	0.10769740538389634	0.2358253630521174
32	EcR_+_+_(52r)	EcR_+_+_(71g)	chr3L:123723-124223	p130CAS	0.07276193904467812	0.2215109657294088
33	EcR_+_+_(52r)	EcR_+_+_(71g)	chr3L:16820673-16821173	sina	0.05003330995588725	0.351763712297138
34	EcR_+_+_(52r)	EcR_+_+_(71g)	chr2L:8720962-8721462	raw	0.14799276749075596	0.2198988885151115
35	EcR_+_+_(52r)	EcR_+_+_(71g)	chr2R:9407087-9407587	wun	0.29746567752782516	0.1254119608067319
36	EcR_+_+_(52r)	EcR_+_+_(71g)	chr2R:21940739-21941239	Fili	0.2501199134579063	0.2637262469553963
37	EcR_+_+_(52r)	EcR_+_+_(71g)	chr2R:21937091-21937591	Fili	0.227871691154395	0.2637262469553963
38	EcR_+_+_(52r)	EcR_+_+_(71g)	chr3R:31604459-31604959	CG1635	0.07154395046501064	0.1157247767330268
39	EcR_+_+_(52r)	EcR_+_+_(71g)	chr2L:20879797-20880297	CG9336	0.2492278037872622	0.2291976534375259
40	EcR_+_+_(52r)	EcR_+_+_(71g)	chr2R:9129023-9129523	CG13742	0.039599192564346054	0.109258150375605
41	EcR_+_+_(52r)	EcR_+_+_(71g)	chr2L:17445657-17446157	CLIP-190	0.07168762066705868	0.3260068277451156
42	EcR_+_+_(52r)	EcR_+_+_(71g)	chr3R:19909180-19909680	Ire1	0.05608695560550016	0.1714014370726819
43	EcR_+_+_(52r)	EcR_+_+_(71g)	chr2R:10853766-10854266	CG30015	0.13671123012630815	0.2599919537108429
44	EcR_+_+_(52r)	EcR_+_+_(71g)	chr2R:24065434-24065934	snama	0.040995504543837075	0.1777865875888397
45	EcR_+_+_(52r)	EcR_+_+_(71g)	chr3R:20261607-20262107	CG42668	0.08518460123161405	0.3170993399122965
46	EcR_+_+_(52r)	EcR_+_+_(71g)	chr3R:19909180-19909680	Surf6	0.03920446070542438	0.222714238389663
47	EcR_+_+_(52r)	EcR_+_+_(71g)	chr2L:13021266-13021766	CG9932	0.48947336426929283	0.2999673825370993
48	EcR_+_+_(52r)	EcR_+_+_(71g)	chr2R:23592619-23593119	pita	0.04373041291289175	0.2098636257942042
49	EcR_+_+_(52r)	EcR_+_+_(71g)	chr2R:20832789-20833289	Ipk1	0.038647041045445835	0.1396388152407878
50	EcR_+_+_(52r)	EcR_+_+_(71g)	chr3L:16820673-16821173	CG9674	0.11900521444527694	0.2117951598531806
51	EcR_+_+_(52r)	EcR_+_+_(71g)	chr2L:7416759-7417259	chm	0.03684108273935402	0.1637040158758705
52	EcR_+_+_(52r)	EcR_+_+_(71g)	chrX:8580895-8581395	CG12065	0.16162928919708708	0.1619024777262748
53	EcR_+_+_(52r)	EcR_+_+_(71g)	chr2R:9129023-9129523	Phax	0.04272828991399291	0.1419772625698772
54	EcR_+_+_(52r)	EcR_+_+_(71g)	chr3R:4958937-4959437	CG2016	0.17766972110185986	0.1087294098804325
55	EcR_+_+_(52r)	EcR_+_+_(71g)	chr2L:10679880-10680380	CG17104	0.0957566204723713	0.0549594518692776
56	EcR_+_+_(52r)	EcR_+_+_(71g)	chr2L:9421405-9421905	Aldh	0.1484845774494206	0.3257690685924413
57	EcR_+_+_(52r)	EcR_+_+_(71g)	chr2R:24065434-24065934	CG4049	0.04356972358181742	0.1275577113076312
58	EcR_+_+_(52r)	EcR_+_+_(71g)	chr3L:2804163-2804663	AhcyL1	0.0757302271762312	0.2268937946553832
59	EcR_+_+_(52r)	EcR_+_+_(71g)	chr3R:26551754-26552254	scrib	0.03905148104123172	0.3782700138361954
60	EcR_+_+_(52r)	EcR_+_+_(71g)	chr2R:24065434-24065934	HSPC300	0.058673584929027085	0.1305722335829423
61	EcR_+_+_(52r)	EcR_+_+_(71g)	chr3R:20261607-20262107	cic	0.08792278508691102	0.4343852018201091
62	EcR_+_+_(52r)	EcR_+_+_(71g)	chrX:9636190-9636690	nej	0.08326338777138358	0.4100148604621296
63	EcR_+_+_(52r)	EcR_+_+_(71g)	chrX:17881471-17881971	CG6762	0.03786158538605389	0.0794467553625658
64	EcR_+_+_(52r)	EcR_+_+_(71g)	chr3R:8358525-8359025	stck	0.1014339778648524	0.2544926107290102
65	EcR_+_+_(52r)	EcR_+_+_(71g)	chr2R:9407087-9407587	Non1	0.08270967577125098	0.4710536158061879
66	EcR_+_+_(52r)	EcR_+_+_(71g)	chr3R:26085683-26086183	CG6142	0.037197878155675136	0.1207281333969054
67	EcR_+_+_(52r)	EcR_+_+_(71g)	chr3R:11638030-11638530	Csk	0.13665038687161526	0.3072718152355236
68	EcR_+_+_(52r)	EcR_+_+_(71g)	chr2R:15944492-15944992	bdg	0.054828020395099694	0.2388705139042165
69	EcR_+_+_(52r)	EcR_+_+_(71g)	chr2R:13498016-13498516	cnn	0.09058951000458317	0.2295227550495922
70	EcR_+_+_(52r)	EcR_+_+_(71g)	chr3R:26436675-26437175	CG5447	0.03172086130659642	0.1638534606923543
71	EcR_+_+_(52r)	EcR_+_+_(71g)	chr2L:5438357-5438857	mid	0.06759257251217675	0.0888580756987819
72	EcR_+_+_(52r)	EcR_+_+_(71g)	chr3R:14437196-14437696	cv-c	0.39147887085741573	0.3291368760290728
73	EcR_+_+_(52r)	EcR_+_+_(71g)	chr3L:8552005-8552505	foi	0.051099546067799706	0.2160084562568438
0	Irbp18_+_+_(10r)	Irbp18_+_+_(15g)	chr3R:12401413-12401913	GstD1	0.07824699916563113	0.1543381411655635
1	Irbp18_+_+_(10r)	Irbp18_+_+_(15g)	chr3R:11978937-11979437	CG10005	0.10168085180512537	0.0865739137567783
2	Irbp18_+_+_(10r)	Irbp18_+_+_(15g)	chrX:13137358-13137858	CG32641	0.0839165314776131	0.0879257194084927
3	Irbp18_+_+_(10r)	Irbp18_+_+_(15g)	chr2L:14248326-14248826	Dyrk2	0.19448674579480116	0.0478232061002951
4	Irbp18_+_+_(10r)	Irbp18_+_+_(15g)	chr3R:22375489-22375989	pinta	0.06043650033825279	0.0439622917580979
5	Irbp18_+_+_(10r)	Irbp18_+_+_(15g)	chr3L:7821592-7822092	CG32369	0.04121258489093069	0.0714508856012269
6	Irbp18_+_+_(10r)	Irbp18_+_+_(15g)	chr3R:11978937-11979437	Spt3	0.07079525793696113	0.0612787342455186
7	Irbp18_+_+_(10r)	Irbp18_+_+_(15g)	chr3L:6219324-6219824	Sf3b6	0.07211463545627576	0.0900740020342718
8	Irbp18_+_+_(10r)	Irbp18_+_+_(15g)	chr3R:12401413-12401913	pps	0.0352236925677019	0.03953775732762
9	Irbp18_+_+_(10r)	Irbp18_+_+_(15g)	chr3R:12401413-12401913	GstD3	0.19022166827486303	0.1403566770779689
10	Irbp18_+_+_(10r)	Irbp18_+_+_(15g)	chr3R:31711755-31712255	CG1896	0.04372647235333692	0.063612589113687
11	Irbp18_+_+_(10r)	Irbp18_+_+_(15g)	chr3R:18619945-18620445	CG7702	0.03256248154938215	0.0596261252769272
12	Irbp18_+_+_(10r)	Irbp18_+_+_(15g)	chr3R:11978937-11979437	Tango9	0.11016292174768835	0.0763580968601426
13	Irbp18_+_+_(10r)	Irbp18_+_+_(15g)	chr3R:22375489-22375989	CG5391	0.07825745125020603	0.0336455473892735
14	Irbp18_+_+_(10r)	Irbp18_+_+_(15g)	chrX:18700710-18701210	Cyp18a1	0.09292026124353446	0.1027094031971165
0	Jra_+_+_(631r)	Jra_+_+_(408g)	chr2R:22389225-22389725	CG6044	0.11746830333302394	0.1919588184506878
1	Jra_+_+_(631r)	Jra_+_+_(408g)	chr2R:22389939-22390439	CG6044	0.11754417259142838	0.1919588184506878
2	Jra_+_+_(631r)	Jra_+_+_(408g)	chr2R:22390473-22390973	CG6044	0.08683799252936725	0.1919588184506878
3	Jra_+_+_(631r)	Jra_+_+_(408g)	chrX:2085912-2086412	moody	0.1968839701489433	0.1196866312746428
4	Jra_+_+_(631r)	Jra_+_+_(408g)	chrX:2051359-2051859	moody	0.22271715321210797	0.1196866312746428
5	Jra_+_+_(631r)	Jra_+_+_(408g)	chrX:2049774-2050274	moody	0.22088893020191666	0.1196866312746428
6	Jra_+_+_(631r)	Jra_+_+_(408g)	chr3R:17114601-17115101	Mur89F	0.06973213151528486	0.0853060383952852
7	Jra_+_+_(631r)	Jra_+_+_(408g)	chr3R:17204537-17205037	Mur89F	0.12332757068148174	0.0853060383952852
8	Jra_+_+_(631r)	Jra_+_+_(408g)	chr3L:6724804-6725304	Ist1	0.04120304835974499	0.1848663971522861
9	Jra_+_+_(631r)	Jra_+_+_(408g)	chr3L:6756189-6756689	Ist1	0.08912721247507839	0.1848663971522861
10	Jra_+_+_(631r)	Jra_+_+_(408g)	chr3R:8109470-8109970	puc	0.3333075389376231	0.262176425952052
11	Jra_+_+_(631r)	Jra_+_+_(408g)	chr3R:8118029-8118529	puc	0.3174964419531689	0.262176425952052
12	Jra_+_+_(631r)	Jra_+_+_(408g)	chr3R:8110177-8110677	puc	0.3548376462005775	0.262176425952052
13	Jra_+_+_(631r)	Jra_+_+_(408g)	chr3R:8111451-8111951	puc	0.3155562552550953	0.262176425952052
14	Jra_+_+_(631r)	Jra_+_+_(408g)	chr3R:8116231-8116731	puc	0.31558215310809046	0.262176425952052
15	Jra_+_+_(631r)	Jra_+_+_(408g)	chr3R:8107818-8108318	puc	0.29176361016950736	0.262176425952052
16	Jra_+_+_(631r)	Jra_+_+_(408g)	chr3R:8116971-8117471	puc	0.33260218665716373	0.262176425952052
17	Jra_+_+_(631r)	Jra_+_+_(408g)	chr3R:8127018-8127518	puc	0.2549079421254399	0.262176425952052
18	Jra_+_+_(631r)	Jra_+_+_(408g)	chr3R:27070014-27070514	Cpr97Ea	0.04193607480922298	0.0557474809175088
19	Jra_+_+_(631r)	Jra_+_+_(408g)	chr2L:13295668-13296168	CG31729	0.10467583743742108	0.16441926669686
20	Jra_+_+_(631r)	Jra_+_+_(408g)	chr2L:13284652-13285152	CG31729	0.1118822101059382	0.16441926669686
21	Jra_+_+_(631r)	Jra_+_+_(408g)	chr3R:19849134-19849634	bnl	0.07194885842232684	0.0716526446316819
22	Jra_+_+_(631r)	Jra_+_+_(408g)	chrX:20147249-20147749	aspr	0.3303645299458477	0.2191281144428085
23	Jra_+_+_(631r)	Jra_+_+_(408g)	chrX:20147875-20148375	aspr	0.32660792188866306	0.2191281144428085
24	Jra_+_+_(631r)	Jra_+_+_(408g)	chr2R:14572789-14573289	LamC	0.2685567459529651	0.2176660401547832
25	Jra_+_+_(631r)	Jra_+_+_(408g)	chr2R:14577773-14578273	LamC	0.26231220902327074	0.2176660401547832
26	Jra_+_+_(631r)	Jra_+_+_(408g)	chr2R:14576877-14577377	LamC	0.2677084250705914	0.2176660401547832
27	Jra_+_+_(631r)	Jra_+_+_(408g)	chr2R:14534075-14534575	LamC	0.291772315395341	0.2176660401547832
28	Jra_+_+_(631r)	Jra_+_+_(408g)	chrX:1945897-1946397	CG3587	0.06420148445031686	0.07426045200132
29	Jra_+_+_(631r)	Jra_+_+_(408g)	chr2L:16756404-16756904	yellow-b	0.46190236529534157	0.2420614510056772
30	Jra_+_+_(631r)	Jra_+_+_(408g)	chr2L:16752547-16753047	yellow-b	0.44950091240477735	0.2420614510056772
31	Jra_+_+_(631r)	Jra_+_+_(408g)	chr2L:16755035-16755535	yellow-b	0.4631919094312096	0.2420614510056772
32	Jra_+_+_(631r)	Jra_+_+_(408g)	chr2L:16803726-16804226	yellow-b	0.39780154158718345	0.2420614510056772
33	Jra_+_+_(631r)	Jra_+_+_(408g)	chr2L:16755725-16756225	yellow-b	0.4832814886972088	0.2420614510056772
34	Jra_+_+_(631r)	Jra_+_+_(408g)	chrX:2085912-2086412	CG4025	0.10172311977505229	0.1434071295287793
35	Jra_+_+_(631r)	Jra_+_+_(408g)	chrX:2051359-2051859	CG4025	0.08598720188955705	0.1434071295287793
36	Jra_+_+_(631r)	Jra_+_+_(408g)	chrX:5674989-5675489	Tre1	0.10235262408013453	0.1386438636237696
37	Jra_+_+_(631r)	Jra_+_+_(408g)	chrX:5676155-5676655	Tre1	0.1482475358033473	0.1386438636237696
38	Jra_+_+_(631r)	Jra_+_+_(408g)	chrX:5678742-5679242	Tre1	0.16285339027978588	0.1386438636237696
39	Jra_+_+_(631r)	Jra_+_+_(408g)	chrX:5725607-5726107	Tre1	0.06819967421323046	0.1386438636237696
40	Jra_+_+_(631r)	Jra_+_+_(408g)	chr2R:13930377-13930877	shot	0.2607681997164423	0.2851561036612771
41	Jra_+_+_(631r)	Jra_+_+_(408g)	chr2R:13929412-13929912	shot	0.26257699388575845	0.2851561036612771
42	Jra_+_+_(631r)	Jra_+_+_(408g)	chr2R:13921860-13922360	shot	0.2398691520077718	0.2851561036612771
43	Jra_+_+_(631r)	Jra_+_+_(408g)	chr2R:13899216-13899716	shot	0.2272074292644068	0.2851561036612771
44	Jra_+_+_(631r)	Jra_+_+_(408g)	chr2R:13926888-13927388	shot	0.2750004149212832	0.2851561036612771
45	Jra_+_+_(631r)	Jra_+_+_(408g)	chr2R:13898576-13899076	shot	0.25246080020078737	0.2851561036612771
46	Jra_+_+_(631r)	Jra_+_+_(408g)	chr2R:13915663-13916163	shot	0.27683420512389456	0.2851561036612771
47	Jra_+_+_(631r)	Jra_+_+_(408g)	chr2R:13913988-13914488	shot	0.2170558496657715	0.2851561036612771
48	Jra_+_+_(631r)	Jra_+_+_(408g)	chr3L:9671037-9671537	SH3PX1	0.08786804156158626	0.1463296845744373
49	Jra_+_+_(631r)	Jra_+_+_(408g)	chr3L:9735325-9735825	SH3PX1	0.06324661296658371	0.1463296845744373
50	Jra_+_+_(631r)	Jra_+_+_(408g)	chr2R:16106605-16107105	Rho1	0.16604119495638614	0.3166637803125459
51	Jra_+_+_(631r)	Jra_+_+_(408g)	chr2R:16104629-16105129	Rho1	0.07629480274312957	0.3166637803125459
52	Jra_+_+_(631r)	Jra_+_+_(408g)	chr2R:16126110-16126610	Rho1	0.143927254181586	0.3166637803125459
53	Jra_+_+_(631r)	Jra_+_+_(408g)	chr3R:22464584-22465084	CCT1	0.07461152606635345	0.2342161880153568
54	Jra_+_+_(631r)	Jra_+_+_(408g)	chrX:9931779-9932279	CG9691	0.04195714175614372	0.2874381921043249
55	Jra_+_+_(631r)	Jra_+_+_(408g)	chrX:9882854-9883354	CG9691	0.2870991652310543	0.2874381921043249
56	Jra_+_+_(631r)	Jra_+_+_(408g)	chrX:19144583-19145083	CG7914	0.032051174812079926	0.0672047250250349
57	Jra_+_+_(631r)	Jra_+_+_(408g)	chrX:19157510-19158010	CG7914	0.03226241252161422	0.0672047250250349
58	Jra_+_+_(631r)	Jra_+_+_(408g)	chrX:18241810-18242310	upd2	0.26703840374779547	0.2085063272979767
59	Jra_+_+_(631r)	Jra_+_+_(408g)	chrX:18252615-18253115	upd2	0.2721900627782293	0.2085063272979767
60	Jra_+_+_(631r)	Jra_+_+_(408g)	chrX:18278904-18279404	upd2	0.24924495950880968	0.2085063272979767
61	Jra_+_+_(631r)	Jra_+_+_(408g)	chrX:18264242-18264742	upd2	0.26304941488789474	0.2085063272979767
62	Jra_+_+_(631r)	Jra_+_+_(408g)	chrX:18247726-18248226	upd2	0.27174438961451913	0.2085063272979767
63	Jra_+_+_(631r)	Jra_+_+_(408g)	chrX:18283662-18284162	upd2	0.2719952991437503	0.2085063272979767
64	Jra_+_+_(631r)	Jra_+_+_(408g)	chrX:18255283-18255783	upd2	0.2616907397917016	0.2085063272979767
65	Jra_+_+_(631r)	Jra_+_+_(408g)	chr3L:8076327-8076827	Sarm	0.3328737432476651	0.2531335350607169
66	Jra_+_+_(631r)	Jra_+_+_(408g)	chr3L:8075794-8076294	Sarm	0.328212754567484	0.2531335350607169
67	Jra_+_+_(631r)	Jra_+_+_(408g)	chrX:5725607-5726107	AdamTS-B	0.13276442702027552	0.1830649460429439
68	Jra_+_+_(631r)	Jra_+_+_(408g)	chrX:5678742-5679242	AdamTS-B	0.16605963544499308	0.1830649460429439
69	Jra_+_+_(631r)	Jra_+_+_(408g)	chrX:5676155-5676655	AdamTS-B	0.18802728726696072	0.1830649460429439
70	Jra_+_+_(631r)	Jra_+_+_(408g)	chr2L:864896-865396	kraken	0.05477726482628318	0.1597741220791111
71	Jra_+_+_(631r)	Jra_+_+_(408g)	chr2R:20615561-20616061	FAM21	0.03383078662020331	0.0547972875967149
72	Jra_+_+_(631r)	Jra_+_+_(408g)	chr3L:3952079-3952579	Ubi-p63E	0.08602381269582182	0.2307433040329142
73	Jra_+_+_(631r)	Jra_+_+_(408g)	chrX:9076388-9076888	CG44325	0.13026390019412054	0.2923843146455184
74	Jra_+_+_(631r)	Jra_+_+_(408g)	chrX:9111194-9111694	CG44325	0.14569658187520534	0.2923843146455184
75	Jra_+_+_(631r)	Jra_+_+_(408g)	chrX:9076955-9077455	CG44325	0.1249481115102415	0.2923843146455184
76	Jra_+_+_(631r)	Jra_+_+_(408g)	chrX:9075646-9076146	CG44325	0.14865650802742955	0.2923843146455184
77	Jra_+_+_(631r)	Jra_+_+_(408g)	chr2L:11960887-11961387	Qtzl	0.0350462060493716	0.0835220559855948
78	Jra_+_+_(631r)	Jra_+_+_(408g)	chrX:11908732-11909232	pot	0.1495862022253102	0.2480275636681525
79	Jra_+_+_(631r)	Jra_+_+_(408g)	chr2R:15815631-15816131	Gpo1	0.07367971065472718	0.0971013708130585
80	Jra_+_+_(631r)	Jra_+_+_(408g)	chr2R:15808350-15808850	Gpo1	0.07420893790345666	0.0971013708130585
81	Jra_+_+_(631r)	Jra_+_+_(408g)	chrX:10574845-10575345	spri	0.1972523522453728	0.1982102337930612
82	Jra_+_+_(631r)	Jra_+_+_(408g)	chrX:10557135-10557635	spri	0.25508887430067034	0.1982102337930612
83	Jra_+_+_(631r)	Jra_+_+_(408g)	chr2L:16755725-16756225	Cyt-c-p	0.11443035181582133	0.2473120114930215
84	Jra_+_+_(631r)	Jra_+_+_(408g)	chr2L:16752547-16753047	Cyt-c-p	0.13952970544499746	0.2473120114930215
85	Jra_+_+_(631r)	Jra_+_+_(408g)	chr3R:12371432-12371932	Sccpdh2	0.051268920931395685	0.0464598236479857
86	Jra_+_+_(631r)	Jra_+_+_(408g)	chr3R:12359831-12360331	Sccpdh2	0.030307237510579996	0.0464598236479857
87	Jra_+_+_(631r)	Jra_+_+_(408g)	chr2R:6685979-6686479	Tdc1	0.2541061544280604	0.1892211520891171
88	Jra_+_+_(631r)	Jra_+_+_(408g)	chr2R:6684061-6684561	Tdc1	0.2546479055037325	0.1892211520891171
89	Jra_+_+_(631r)	Jra_+_+_(408g)	chr2R:6681855-6682355	Tdc1	0.25135095938680746	0.1892211520891171
90	Jra_+_+_(631r)	Jra_+_+_(408g)	chr3R:20918248-20918748	hdly	0.05153776869410488	0.1628960223757386
91	Jra_+_+_(631r)	Jra_+_+_(408g)	chr3R:5622086-5622586	CG31549	0.07972442880511686	0.134949763292437
92	Jra_+_+_(631r)	Jra_+_+_(408g)	chr3R:5618177-5618677	CG31549	0.0852175586367433	0.134949763292437
93	Jra_+_+_(631r)	Jra_+_+_(408g)	chr2L:17446402-17446902	fws	0.033121292833329756	0.0696602548526195
94	Jra_+_+_(631r)	Jra_+_+_(408g)	chr2L:17447865-17448365	fws	0.034927937348981954	0.0696602548526195
95	Jra_+_+_(631r)	Jra_+_+_(408g)	chrX:19155765-19156265	RhoGAP18B	0.05791627337209179	0.1296311587543023
96	Jra_+_+_(631r)	Jra_+_+_(408g)	chrX:19144583-19145083	RhoGAP18B	0.1591388084673832	0.1296311587543023
97	Jra_+_+_(631r)	Jra_+_+_(408g)	chrX:19157510-19158010	RhoGAP18B	0.2269382526931438	0.1296311587543023
98	Jra_+_+_(631r)	Jra_+_+_(408g)	chrX:19135478-19135978	RhoGAP18B	0.23995162444702817	0.1296311587543023
99	Jra_+_+_(631r)	Jra_+_+_(408g)	chr2R:13978341-13978841	CG6701	0.04592036080309637	0.2039468205064785
100	Jra_+_+_(631r)	Jra_+_+_(408g)	chr2R:13926888-13927388	CG6701	0.12434768261701701	0.2039468205064785
101	Jra_+_+_(631r)	Jra_+_+_(408g)	chr2L:18499386-18499886	CG10283	0.031223082036195733	0.09637425097868
102	Jra_+_+_(631r)	Jra_+_+_(408g)	chr2L:18477042-18477542	CG10283	0.06721074401149724	0.09637425097868
103	Jra_+_+_(631r)	Jra_+_+_(408g)	chr2R:21026273-21026773	CG10527	0.2698213383396412	0.3046013984337753
104	Jra_+_+_(631r)	Jra_+_+_(408g)	chr2R:21072819-21073319	CG10527	0.38440699478833373	0.3046013984337753
105	Jra_+_+_(631r)	Jra_+_+_(408g)	chr2R:21067143-21067643	CG10527	0.3162298267342185	0.3046013984337753
106	Jra_+_+_(631r)	Jra_+_+_(408g)	chr2R:21058191-21058691	CG10527	0.34293434660014793	0.3046013984337753
107	Jra_+_+_(631r)	Jra_+_+_(408g)	chr2R:21073582-21074082	CG10527	0.37187819052281723	0.3046013984337753
108	Jra_+_+_(631r)	Jra_+_+_(408g)	chr2L:6986516-6987016	Rab30	0.05907987763827238	0.0900617413335291
109	Jra_+_+_(631r)	Jra_+_+_(408g)	chr2L:7032042-7032542	Rab30	0.047530592175930406	0.0900617413335291
110	Jra_+_+_(631r)	Jra_+_+_(408g)	chr2L:7045135-7045635	Rab30	0.0695539616839342	0.0900617413335291
111	Jra_+_+_(631r)	Jra_+_+_(408g)	chr3L:18182159-18182659	hid	0.1822018268880579	0.2434623236463189
112	Jra_+_+_(631r)	Jra_+_+_(408g)	chr3L:18198924-18199424	hid	0.31819689075655727	0.2434623236463189
113	Jra_+_+_(631r)	Jra_+_+_(408g)	chr3L:18222024-18222524	hid	0.24538991687632208	0.2434623236463189
114	Jra_+_+_(631r)	Jra_+_+_(408g)	chr3L:18210377-18210877	hid	0.14149566818739878	0.2434623236463189
115	Jra_+_+_(631r)	Jra_+_+_(408g)	chr3L:18210962-18211462	hid	0.22176530033766512	0.2434623236463189
116	Jra_+_+_(631r)	Jra_+_+_(408g)	chr3L:15951929-15952429	l(3)72Ab	0.06322180992652836	0.1723195022452497
117	Jra_+_+_(631r)	Jra_+_+_(408g)	chrX:11532773-11533273	PGRP-SA	0.24877770310617245	0.1490272442839508
118	Jra_+_+_(631r)	Jra_+_+_(408g)	chrX:11556399-11556899	PGRP-SA	0.23850099400691585	0.1490272442839508
119	Jra_+_+_(631r)	Jra_+_+_(408g)	chrX:11559898-11560398	PGRP-SA	0.2738255844974567	0.1490272442839508
120	Jra_+_+_(631r)	Jra_+_+_(408g)	chr2R:19144543-19145043	CG10737	0.0723716269531943	0.0864959804130506
121	Jra_+_+_(631r)	Jra_+_+_(408g)	chr2R:19181390-19181890	CG10737	0.0506262567117329	0.0864959804130506
122	Jra_+_+_(631r)	Jra_+_+_(408g)	chr2R:19171337-19171837	CG10737	0.06347429198014092	0.0864959804130506
123	Jra_+_+_(631r)	Jra_+_+_(408g)	chr2R:19169817-19170317	CG10737	0.031236814589583835	0.0864959804130506
124	Jra_+_+_(631r)	Jra_+_+_(408g)	chr3L:2142934-2143434	CG15879	0.035861384766183134	0.0765935383230541
125	Jra_+_+_(631r)	Jra_+_+_(408g)	chrX:11532773-11533273	CG1572	0.3854211914957681	0.2444594264212631
126	Jra_+_+_(631r)	Jra_+_+_(408g)	chrX:11559898-11560398	CG1572	0.4786670542957642	0.2444594264212631
127	Jra_+_+_(631r)	Jra_+_+_(408g)	chrX:11556399-11556899	CG1572	0.43362891708292517	0.2444594264212631
128	Jra_+_+_(631r)	Jra_+_+_(408g)	chr3R:22464584-22465084	AP-2mu	0.03228550093314805	0.1202959127160184
129	Jra_+_+_(631r)	Jra_+_+_(408g)	chr2R:15808350-15808850	Zasp52	0.27761063649035356	0.2123797157702252
130	Jra_+_+_(631r)	Jra_+_+_(408g)	chr2R:15800877-15801377	Zasp52	0.27460040018490106	0.2123797157702252
131	Jra_+_+_(631r)	Jra_+_+_(408g)	chr2R:15790425-15790925	Zasp52	0.2935908096610943	0.2123797157702252
132	Jra_+_+_(631r)	Jra_+_+_(408g)	chr2R:15797317-15797817	Zasp52	0.2708094082138406	0.2123797157702252
133	Jra_+_+_(631r)	Jra_+_+_(408g)	chr2R:15806388-15806888	Zasp52	0.2877659223497123	0.2123797157702252
134	Jra_+_+_(631r)	Jra_+_+_(408g)	chr2R:15798886-15799386	Zasp52	0.26204846137800963	0.2123797157702252
135	Jra_+_+_(631r)	Jra_+_+_(408g)	chrX:13804382-13804882	AMPdeam	0.05569944727697349	0.1390617783838392
136	Jra_+_+_(631r)	Jra_+_+_(408g)	chrX:13843391-13843891	AMPdeam	0.05385735410694649	0.1390617783838392
137	Jra_+_+_(631r)	Jra_+_+_(408g)	chr3L:3778872-3779372	ntc	0.0496225097705115	0.064482420284254
138	Jra_+_+_(631r)	Jra_+_+_(408g)	chr3L:3805037-3805537	ntc	0.05940380308687955	0.064482420284254
139	Jra_+_+_(631r)	Jra_+_+_(408g)	chr3L:3847779-3848279	ntc	0.03144178727270361	0.064482420284254
140	Jra_+_+_(631r)	Jra_+_+_(408g)	chr2L:7417625-7418125	Wnt10	0.0626491843033179	0.0368611640667496
141	Jra_+_+_(631r)	Jra_+_+_(408g)	chr2L:7367567-7368067	Wnt10	0.08855459232142354	0.0368611640667496
142	Jra_+_+_(631r)	Jra_+_+_(408g)	chr2L:7339501-7340001	Wnt10	0.08050810997626963	0.0368611640667496
143	Jra_+_+_(631r)	Jra_+_+_(408g)	chr2L:7322402-7322902	Wnt10	0.09917411822012391	0.0368611640667496
144	Jra_+_+_(631r)	Jra_+_+_(408g)	chr3L:2494397-2494897	CG1146	0.39754711984776014	0.3073046161742604
145	Jra_+_+_(631r)	Jra_+_+_(408g)	chr3L:2493382-2493882	CG1146	0.3915643329117769	0.3073046161742604
146	Jra_+_+_(631r)	Jra_+_+_(408g)	chr3L:2483273-2483773	CG1146	0.42250335144215667	0.3073046161742604
147	Jra_+_+_(631r)	Jra_+_+_(408g)	chr3R:21112758-21113258	Cortactin	0.09984242169853677	0.1973680665650016
148	Jra_+_+_(631r)	Jra_+_+_(408g)	chr3R:21094257-21094757	Cortactin	0.05592735290034212	0.1973680665650016
149	Jra_+_+_(631r)	Jra_+_+_(408g)	chr3R:21087908-21088408	Cortactin	0.06885710863189624	0.1973680665650016
150	Jra_+_+_(631r)	Jra_+_+_(408g)	chr2L:10690855-10691355	CG7294	0.20553949048087025	0.0996099211102999
151	Jra_+_+_(631r)	Jra_+_+_(408g)	chr2L:10686951-10687451	CG7294	0.1794293913941331	0.0996099211102999
152	Jra_+_+_(631r)	Jra_+_+_(408g)	chr2L:2460750-2461250	CG18641	0.10832474438779531	0.1099725209614251
153	Jra_+_+_(631r)	Jra_+_+_(408g)	chr2L:2462200-2462700	CG18641	0.10586670379433051	0.1099725209614251
154	Jra_+_+_(631r)	Jra_+_+_(408g)	chr2L:2413636-2414136	CG18641	0.10803810370800496	0.1099725209614251
155	Jra_+_+_(631r)	Jra_+_+_(408g)	chr2L:20704892-20705392	Ns4	0.03579815755713443	0.0820245295584487
156	Jra_+_+_(631r)	Jra_+_+_(408g)	chr2L:20798967-20799467	Ns4	0.04017511563729513	0.0820245295584487
157	Jra_+_+_(631r)	Jra_+_+_(408g)	chr2R:25001664-25002164	zip	0.11069043451527978	0.3024245875550453
158	Jra_+_+_(631r)	Jra_+_+_(408g)	chr2R:25002967-25003467	zip	0.2603793320898686	0.3024245875550453
159	Jra_+_+_(631r)	Jra_+_+_(408g)	chr2R:24996452-24996952	zip	0.26351303837654483	0.3024245875550453
160	Jra_+_+_(631r)	Jra_+_+_(408g)	chr2R:24990955-24991455	zip	0.23866371774297226	0.3024245875550453
161	Jra_+_+_(631r)	Jra_+_+_(408g)	chr2L:7090646-7091146	Pvf2	0.258635328537429	0.2019677409540488
162	Jra_+_+_(631r)	Jra_+_+_(408g)	chr2L:7045135-7045635	Pvf2	0.3139559905387145	0.2019677409540488
163	Jra_+_+_(631r)	Jra_+_+_(408g)	chr2L:7082345-7082845	Pvf2	0.2863380446707017	0.2019677409540488
164	Jra_+_+_(631r)	Jra_+_+_(408g)	chr2L:7091241-7091741	Pvf2	0.32209518434026435	0.2019677409540488
165	Jra_+_+_(631r)	Jra_+_+_(408g)	chr2L:8530535-8531035	CG17834	0.2347371838624041	0.0810640231965409
166	Jra_+_+_(631r)	Jra_+_+_(408g)	chr2L:8237500-8238000	Pvr	0.21962497277877632	0.1742919514752461
167	Jra_+_+_(631r)	Jra_+_+_(408g)	chr2L:8171620-8172120	Pvr	0.08981816439676982	0.1742919514752461
168	Jra_+_+_(631r)	Jra_+_+_(408g)	chr2R:5812909-5813409	ZnT41F	0.06081158306418789	0.0832713049097563
169	Jra_+_+_(631r)	Jra_+_+_(408g)	chr3L:21177109-21177609	CG33056	0.05592976355395818	0.1129250273555734
170	Jra_+_+_(631r)	Jra_+_+_(408g)	chr3L:21217104-21217604	CG33056	0.05572620923293032	0.1129250273555734
171	Jra_+_+_(631r)	Jra_+_+_(408g)	chrX:4136436-4136936	Fas2	0.2896487999242573	0.2728817992842418
172	Jra_+_+_(631r)	Jra_+_+_(408g)	chrX:4145626-4146126	Fas2	0.2794575042358697	0.2728817992842418
173	Jra_+_+_(631r)	Jra_+_+_(408g)	chrX:4193255-4193755	Fas2	0.27594193968017383	0.2728817992842418
174	Jra_+_+_(631r)	Jra_+_+_(408g)	chrX:4201825-4202325	Fas2	0.23946426766943896	0.2728817992842418
175	Jra_+_+_(631r)	Jra_+_+_(408g)	chrX:4109725-4110225	Fas2	0.24976536175244388	0.2728817992842418
176	Jra_+_+_(631r)	Jra_+_+_(408g)	chrX:4111266-4111766	Fas2	0.2491799663887439	0.2728817992842418
177	Jra_+_+_(631r)	Jra_+_+_(408g)	chrX:4195290-4195790	Fas2	0.24339926289048225	0.2728817992842418
178	Jra_+_+_(631r)	Jra_+_+_(408g)	chr3R:28915302-28915802	spg	0.05957130803186624	0.0579342462876607
179	Jra_+_+_(631r)	Jra_+_+_(408g)	chr3R:28831067-28831567	spg	0.037606409558034744	0.0579342462876607
180	Jra_+_+_(631r)	Jra_+_+_(408g)	chr3R:28911056-28911556	spg	0.05835974978619956	0.0579342462876607
181	Jra_+_+_(631r)	Jra_+_+_(408g)	chr3R:28905930-28906430	spg	0.03304670509636803	0.0579342462876607
182	Jra_+_+_(631r)	Jra_+_+_(408g)	chr2L:20859718-20860218	CG9338	0.27378399568749673	0.1015027172324475
183	Jra_+_+_(631r)	Jra_+_+_(408g)	chr2L:20907304-20907804	CG9338	0.23293880276859322	0.1015027172324475
184	Jra_+_+_(631r)	Jra_+_+_(408g)	chr2L:20858858-20859358	CG9338	0.2719995974565447	0.1015027172324475
185	Jra_+_+_(631r)	Jra_+_+_(408g)	chr2L:20880348-20880848	CG9338	0.26034400486405757	0.1015027172324475
186	Jra_+_+_(631r)	Jra_+_+_(408g)	chr2L:16315853-16316353	CG4455	0.20250962442794326	0.256690657993501
187	Jra_+_+_(631r)	Jra_+_+_(408g)	chr2L:16355678-16356178	CG4455	0.14789544574411223	0.256690657993501
188	Jra_+_+_(631r)	Jra_+_+_(408g)	chr2L:16353747-16354247	CG4455	0.12769378582335272	0.256690657993501
189	Jra_+_+_(631r)	Jra_+_+_(408g)	chrX:5893123-5893623	Act5C	0.14266650445734821	0.3454086987206637
190	Jra_+_+_(631r)	Jra_+_+_(408g)	chrX:5892487-5892987	Act5C	0.14632394668248064	0.3454086987206637
191	Jra_+_+_(631r)	Jra_+_+_(408g)	chr2R:19144543-19145043	ena	0.18416886981571326	0.235128691139465
192	Jra_+_+_(631r)	Jra_+_+_(408g)	chr2R:19171337-19171837	ena	0.13045195578097454	0.235128691139465
193	Jra_+_+_(631r)	Jra_+_+_(408g)	chr3L:20538407-20538907	Rcd2	0.1519630308463524	0.1584409491773272
194	Jra_+_+_(631r)	Jra_+_+_(408g)	chr3L:20584878-20585378	Rcd2	0.1842966113950374	0.1584409491773272
195	Jra_+_+_(631r)	Jra_+_+_(408g)	chr3L:20535188-20535688	Rcd2	0.18604553464794157	0.1584409491773272
196	Jra_+_+_(631r)	Jra_+_+_(408g)	chr2R:18125868-18126368	Spn55B	0.07181327850382273	0.1964247485205319
197	Jra_+_+_(631r)	Jra_+_+_(408g)	chrX:20518659-20519159	CG1812	0.03740879110653594	0.0745526522804896
198	Jra_+_+_(631r)	Jra_+_+_(408g)	chrX:20519388-20519888	CG1812	0.03963604953811007	0.0745526522804896
199	Jra_+_+_(631r)	Jra_+_+_(408g)	chr3R:24799306-24799806	Ude	0.120509447323406	0.1233890578781738
200	Jra_+_+_(631r)	Jra_+_+_(408g)	chr3R:24798790-24799290	Ude	0.1755575506927873	0.1233890578781738
201	Jra_+_+_(631r)	Jra_+_+_(408g)	chr3R:7124469-7124969	sas	0.18371970158542641	0.2631966583162682
202	Jra_+_+_(631r)	Jra_+_+_(408g)	chr3R:7214486-7214986	sas	0.3139393220938682	0.2631966583162682
203	Jra_+_+_(631r)	Jra_+_+_(408g)	chr3R:7158380-7158880	sas	0.2881732893056644	0.2631966583162682
204	Jra_+_+_(631r)	Jra_+_+_(408g)	chr2R:24794182-24794682	Eps-15	0.047228502796203366	0.1040507202089316
205	Jra_+_+_(631r)	Jra_+_+_(408g)	chrX:11446754-11447254	Evi5	0.12616574004616954	0.1602868781479913
206	Jra_+_+_(631r)	Jra_+_+_(408g)	chrX:11418318-11418818	Evi5	0.10404111037327136	0.1602868781479913
207	Jra_+_+_(631r)	Jra_+_+_(408g)	chrX:11441595-11442095	Evi5	0.1220585822979859	0.1602868781479913
208	Jra_+_+_(631r)	Jra_+_+_(408g)	chrX:11448370-11448870	Evi5	0.11129470664892556	0.1602868781479913
209	Jra_+_+_(631r)	Jra_+_+_(408g)	chr2R:22390473-22390973	CG13506	0.12074961416573712	0.1853576705502261
210	Jra_+_+_(631r)	Jra_+_+_(408g)	chr2R:22389225-22389725	CG13506	0.13425583666972082	0.1853576705502261
211	Jra_+_+_(631r)	Jra_+_+_(408g)	chr2R:22389939-22390439	CG13506	0.1264083759178064	0.1853576705502261
212	Jra_+_+_(631r)	Jra_+_+_(408g)	chr2L:8171620-8172120	CG8360	0.037924689160056015	0.0886294992256705
213	Jra_+_+_(631r)	Jra_+_+_(408g)	chr2L:8237500-8238000	CG8360	0.06037194106710569	0.0886294992256705
214	Jra_+_+_(631r)	Jra_+_+_(408g)	chr2L:8164485-8164985	CG8360	0.05980364240899718	0.0886294992256705
215	Jra_+_+_(631r)	Jra_+_+_(408g)	chr2R:20581007-20581507	Hil	0.09549652312067036	0.1347041351956285
216	Jra_+_+_(631r)	Jra_+_+_(408g)	chrX:17485397-17485897	CG43658	0.24123483739366253	0.2168694110463934
217	Jra_+_+_(631r)	Jra_+_+_(408g)	chrX:17491124-17491624	CG43658	0.1740496788890026	0.2168694110463934
218	Jra_+_+_(631r)	Jra_+_+_(408g)	chr3R:27690479-27690979	CG12883	0.04948049849685387	0.0897337986518624
219	Jra_+_+_(631r)	Jra_+_+_(408g)	chr3R:29880254-29880754	Zip99C	0.0407404836846493	0.0733294672760531
220	Jra_+_+_(631r)	Jra_+_+_(408g)	chr2R:24678958-24679458	Mmp1	0.4145793333618055	0.2423555383532904
221	Jra_+_+_(631r)	Jra_+_+_(408g)	chr2R:24686848-24687348	Mmp1	0.46207582140086917	0.2423555383532904
222	Jra_+_+_(631r)	Jra_+_+_(408g)	chr2R:24687971-24688471	Mmp1	0.4434940701673472	0.2423555383532904
223	Jra_+_+_(631r)	Jra_+_+_(408g)	chr2R:24680384-24680884	Mmp1	0.4316559848711533	0.2423555383532904
224	Jra_+_+_(631r)	Jra_+_+_(408g)	chr2R:24677425-24677925	Mmp1	0.43284628433273353	0.2423555383532904
225	Jra_+_+_(631r)	Jra_+_+_(408g)	chr3R:19150032-19150532	Ppcs	0.030376272175851808	0.061949171689014
226	Jra_+_+_(631r)	Jra_+_+_(408g)	chr3L:1374589-1375089	l(3)02640	0.037406481626340776	0.1022731414708725
227	Jra_+_+_(631r)	Jra_+_+_(408g)	chr3L:1375947-1376447	l(3)02640	0.04401360164246049	0.1022731414708725
228	Jra_+_+_(631r)	Jra_+_+_(408g)	chr2L:2244732-2245232	CG4267	0.17941894068870273	0.1857633219882509
229	Jra_+_+_(631r)	Jra_+_+_(408g)	chr2L:2243437-2243937	CG4267	0.17951374607476586	0.1857633219882509
230	Jra_+_+_(631r)	Jra_+_+_(408g)	chr3L:4226369-4226869	ImpL2	0.21628615719129557	0.197187233900304
231	Jra_+_+_(631r)	Jra_+_+_(408g)	chr3L:4222917-4223417	ImpL2	0.1804772215008374	0.197187233900304
232	Jra_+_+_(631r)	Jra_+_+_(408g)	chr3L:4225723-4226223	ImpL2	0.2173034380314696	0.197187233900304
233	Jra_+_+_(631r)	Jra_+_+_(408g)	chr3R:16661679-16662179	CG14907	0.06270359593952565	0.1088372145932455
234	Jra_+_+_(631r)	Jra_+_+_(408g)	chr3R:16652028-16652528	CG14907	0.06547645911508719	0.1088372145932455
235	Jra_+_+_(631r)	Jra_+_+_(408g)	chr3R:16630777-16631277	CG14907	0.08954147291068958	0.1088372145932455
236	Jra_+_+_(631r)	Jra_+_+_(408g)	chr2R:20651631-20652131	Lrt	0.10339816912094638	0.1061550004233229
237	Jra_+_+_(631r)	Jra_+_+_(408g)	chr3L:21177109-21177609	Ilk	0.0760977907641782	0.1447186514198239
238	Jra_+_+_(631r)	Jra_+_+_(408g)	chr3L:21217104-21217604	Ilk	0.04327897845448952	0.1447186514198239
239	Jra_+_+_(631r)	Jra_+_+_(408g)	chr2L:9739221-9739721	CG31710	0.05046080829579873	0.145065925469304
240	Jra_+_+_(631r)	Jra_+_+_(408g)	chr2L:9737439-9737939	CG31710	0.051509936191318065	0.145065925469304
241	Jra_+_+_(631r)	Jra_+_+_(408g)	chr3L:16339795-16340295	CG13060	0.0526170258070834	0.0377199479780017
242	Jra_+_+_(631r)	Jra_+_+_(408g)	chr3L:19636484-19636984	wnd	0.117007084037718	0.1418395346767064
243	Jra_+_+_(631r)	Jra_+_+_(408g)	chr3L:19637067-19637567	wnd	0.12275589618505828	0.1418395346767064
244	Jra_+_+_(631r)	Jra_+_+_(408g)	chr2R:24083494-24083994	tsr	0.14241491972938627	0.3296199445715357
245	Jra_+_+_(631r)	Jra_+_+_(408g)	chr2R:24065434-24065934	tsr	0.15229176511889342	0.3296199445715357
246	Jra_+_+_(631r)	Jra_+_+_(408g)	chrX:1511985-1512485	mei-38	0.03222424226139261	0.0534745325365475
247	Jra_+_+_(631r)	Jra_+_+_(408g)	chrX:1480703-1481203	mei-38	0.030140864342084392	0.0534745325365475
248	Jra_+_+_(631r)	Jra_+_+_(408g)	chrX:11158642-11159142	Dlic	0.15666268436798875	0.2223282063255428
249	Jra_+_+_(631r)	Jra_+_+_(408g)	chrX:11151966-11152466	Dlic	0.13545043459707226	0.2223282063255428
250	Jra_+_+_(631r)	Jra_+_+_(408g)	chrX:11134009-11134509	Dlic	0.14132933280853735	0.2223282063255428
251	Jra_+_+_(631r)	Jra_+_+_(408g)	chr3R:22464584-22465084	CG7054	0.1765358373657302	0.1783079607776621
252	Jra_+_+_(631r)	Jra_+_+_(408g)	chr3R:22487066-22487566	CG7054	0.09848850056195994	0.1783079607776621
253	Jra_+_+_(631r)	Jra_+_+_(408g)	chr2L:6110685-6111185	Arpc4	0.0781110905107058	0.232157966455015
254	Jra_+_+_(631r)	Jra_+_+_(408g)	chr2L:6083980-6084480	Arpc4	0.10211573709535066	0.232157966455015
255	Jra_+_+_(631r)	Jra_+_+_(408g)	chr2L:6116514-6117014	Arpc4	0.08653417752063448	0.232157966455015
256	Jra_+_+_(631r)	Jra_+_+_(408g)	chr2R:22116240-22116740	Vrp1	0.14712854265575975	0.1522052034725264
257	Jra_+_+_(631r)	Jra_+_+_(408g)	chr2R:22120794-22121294	Vrp1	0.16302538347127038	0.1522052034725264
258	Jra_+_+_(631r)	Jra_+_+_(408g)	chr2R:22100212-22100712	Vrp1	0.15959840195014435	0.1522052034725264
259	Jra_+_+_(631r)	Jra_+_+_(408g)	chr2R:22102576-22103076	Vrp1	0.16065327560209677	0.1522052034725264
260	Jra_+_+_(631r)	Jra_+_+_(408g)	chr2R:22119171-22119671	Vrp1	0.16797931736047175	0.1522052034725264
261	Jra_+_+_(631r)	Jra_+_+_(408g)	chr2R:22114331-22114831	Vrp1	0.16739953984618663	0.1522052034725264
262	Jra_+_+_(631r)	Jra_+_+_(408g)	chr2R:22102026-22102526	Vrp1	0.14286525598172367	0.1522052034725264
263	Jra_+_+_(631r)	Jra_+_+_(408g)	chr2R:6684061-6684561	Tdc2	0.18411417653205683	0.133522554568344
264	Jra_+_+_(631r)	Jra_+_+_(408g)	chr2R:6681855-6682355	Tdc2	0.18305416913506023	0.133522554568344
265	Jra_+_+_(631r)	Jra_+_+_(408g)	chr2R:6685979-6686479	Tdc2	0.1886318330938094	0.133522554568344
266	Jra_+_+_(631r)	Jra_+_+_(408g)	chr3R:24628412-24628912	Wsck	0.1424216786038252	0.1938106210543215
267	Jra_+_+_(631r)	Jra_+_+_(408g)	chr3R:24580004-24580504	Wsck	0.12830437733634947	0.1938106210543215
268	Jra_+_+_(631r)	Jra_+_+_(408g)	chr3R:24626470-24626970	Wsck	0.15190139591642296	0.1938106210543215
269	Jra_+_+_(631r)	Jra_+_+_(408g)	chr3L:4119048-4119548	CG1299	0.08967377375764174	0.172040502534269
270	Jra_+_+_(631r)	Jra_+_+_(408g)	chr3L:4149952-4150452	CG1299	0.14730855770020856	0.172040502534269
271	Jra_+_+_(631r)	Jra_+_+_(408g)	chr3L:4103830-4104330	CG1299	0.034678928388102916	0.172040502534269
272	Jra_+_+_(631r)	Jra_+_+_(408g)	chr3L:4188053-4188553	CG1299	0.11609588989873317	0.172040502534269
273	Jra_+_+_(631r)	Jra_+_+_(408g)	chr3L:4109538-4110038	CG1299	0.1242497845886443	0.172040502534269
274	Jra_+_+_(631r)	Jra_+_+_(408g)	chr3L:4145257-4145757	CG1299	0.15391881966988913	0.172040502534269
275	Jra_+_+_(631r)	Jra_+_+_(408g)	chr3L:4176796-4177296	CG1299	0.12650657584764816	0.172040502534269
276	Jra_+_+_(631r)	Jra_+_+_(408g)	chr2L:10611132-10611632	Trim9	0.24237660474193967	0.0979944906284908
277	Jra_+_+_(631r)	Jra_+_+_(408g)	chr2L:10611712-10612212	Trim9	0.2692049671539291	0.0979944906284908
278	Jra_+_+_(631r)	Jra_+_+_(408g)	chr3R:8253225-8253725	mtg	0.22707734179101008	0.2201737092087202
279	Jra_+_+_(631r)	Jra_+_+_(408g)	chrX:8539175-8539675	CG12112	0.12326240600673687	0.1682442928398735
280	Jra_+_+_(631r)	Jra_+_+_(408g)	chrX:8579839-8580339	CG12112	0.11117282319780782	0.1682442928398735
281	Jra_+_+_(631r)	Jra_+_+_(408g)	chrX:8522463-8522963	CG12112	0.12996980854764856	0.1682442928398735
282	Jra_+_+_(631r)	Jra_+_+_(408g)	chrX:8532492-8532992	CG12112	0.11417327746720903	0.1682442928398735
283	Jra_+_+_(631r)	Jra_+_+_(408g)	chrX:8580895-8581395	CG12112	0.11315807563029409	0.1682442928398735
284	Jra_+_+_(631r)	Jra_+_+_(408g)	chrX:8535356-8535856	CG12112	0.14225632508458444	0.1682442928398735
285	Jra_+_+_(631r)	Jra_+_+_(408g)	chrX:8536799-8537299	CG12112	0.11678966176223128	0.1682442928398735
286	Jra_+_+_(631r)	Jra_+_+_(408g)	chr3L:19900423-19900923	Pfdn6	0.07561916231605995	0.2005174603126964
287	Jra_+_+_(631r)	Jra_+_+_(408g)	chr2L:21620677-21621177	CG2201	0.11700303467040336	0.121690165469841
288	Jra_+_+_(631r)	Jra_+_+_(408g)	chr2L:21618705-21619205	CG2201	0.14749029747176431	0.121690165469841
289	Jra_+_+_(631r)	Jra_+_+_(408g)	chr2L:21617185-21617685	CG2201	0.17160427464775713	0.121690165469841
290	Jra_+_+_(631r)	Jra_+_+_(408g)	chrX:20147249-20147749	AnxB10	0.07378673916828495	0.1402403047709604
291	Jra_+_+_(631r)	Jra_+_+_(408g)	chrX:20147875-20148375	AnxB10	0.07242144727261896	0.1402403047709604
292	Jra_+_+_(631r)	Jra_+_+_(408g)	chr3L:1191443-1191943	CG9192	0.20848560806369096	0.1430924341436099
293	Jra_+_+_(631r)	Jra_+_+_(408g)	chr3L:1195996-1196496	CG9192	0.17785164738442513	0.1430924341436099
294	Jra_+_+_(631r)	Jra_+_+_(408g)	chr3L:1242220-1242720	CG9192	0.18399494313862455	0.1430924341436099
295	Jra_+_+_(631r)	Jra_+_+_(408g)	chr3L:1244778-1245278	CG9192	0.12079156686782794	0.1430924341436099
296	Jra_+_+_(631r)	Jra_+_+_(408g)	chr2L:8171620-8172120	Piezo	0.1681170804230783	0.168263493608679
[truncated: 8,589 more rows]
