# Supplementary material for: Shared enhancer gene regulatory networks between wound and oncogenic programs
Source: eLife. 2023 May 3;12:e81173. doi: 10.7554/eLife.81173 (PMC10238094; doi:10.7554/eLife.81173)
Supplement: Supplementary file 3. [file elife-81173-supp3.csv]

chr2L	58967	59467	no_overlap
chr2L	66301	66801	no_overlap
chr2L	66913	67413	no_overlap
chr2L	71812	72312	early_iDRRE
chr2L	107690	108190	early_iDRRE
chr2L	128347	128847	no_overlap
chr2L	128931	129431	no_overlap
chr2L	171534	172034	early_iDRRE
chr2L	182617	183117	no_overlap
chr2L	222009	222509	no_overlap
chr2L	223718	224218	no_overlap
chr2L	224239	224739	no_overlap
chr2L	246577	247077	no_overlap
chr2L	277142	277642	early_iDRRE
chr2L	285398	285898	no_overlap
chr2L	286019	286519	no_overlap
chr2L	297729	298229	no_overlap
chr2L	298410	298910	no_overlap
chr2L	377783	378283	no_overlap
chr2L	403679	404179	no_overlap
chr2L	414077	414577	no_overlap
chr2L	414671	415171	no_overlap
chr2L	419542	420042	no_overlap
chr2L	420190	420690	no_overlap
chr2L	430191	430691	no_overlap
chr2L	510447	510947	no_overlap
chr2L	523330	523830	no_overlap
chr2L	540627	541127	no_overlap
chr2L	560015	560515	no_overlap
chr2L	594555	595055	no_overlap
chr2L	634669	635169	no_overlap
chr2L	671017	671517	no_overlap
chr2L	701197	701697	no_overlap
chr2L	701786	702286	no_overlap
chr2L	714811	715311	no_overlap
chr2L	715336	715836	no_overlap
chr2L	841370	841870	early_iDRRE
chr2L	850606	851106	no_overlap
chr2L	867104	867604	no_overlap
chr2L	868034	868534	no_overlap
chr2L	871262	871762	no_overlap
chr2L	1107978	1108478	no_overlap
chr2L	1128461	1128961	early_iDRRE
chr2L	1142938	1143438	no_overlap
chr2L	1156939	1157439	no_overlap
chr2L	1157444	1157944	early_iDRRE
chr2L	1185746	1186246	no_overlap
chr2L	1186393	1186893	no_overlap
chr2L	1405223	1405723	no_overlap
chr2L	1419678	1420178	no_overlap
chr2L	1420188	1420688	no_overlap
chr2L	1554925	1555425	no_overlap
chr2L	1651047	1651547	no_overlap
chr2L	1668343	1668843	no_overlap
chr2L	1727681	1728181	no_overlap
chr2L	1937409	1937909	no_overlap
chr2L	1987380	1987880	no_overlap
chr2L	1987994	1988494	no_overlap
chr2L	2037588	2038088	no_overlap
chr2L	2130163	2130663	no_overlap
chr2L	2130886	2131386	no_overlap
chr2L	2162377	2162877	no_overlap
chr2L	2163089	2163589	no_overlap
chr2L	2175345	2175845	early_iDRRE
chr2L	2178374	2178874	no_overlap
chr2L	2226538	2227038	no_overlap
chr2L	2236158	2236658	no_overlap
chr2L	2236661	2237161	no_overlap
chr2L	2242095	2242595	no_overlap
chr2L	2242634	2243134	no_overlap
chr2L	2357058	2357558	no_overlap
chr2L	2363251	2363751	no_overlap
chr2L	2364029	2364529	no_overlap
chr2L	2364879	2365379	no_overlap
chr2L	2365459	2365959	no_overlap
chr2L	2374278	2374778	no_overlap
chr2L	2375449	2375949	no_overlap
chr2L	2376133	2376633	no_overlap
chr2L	2415058	2415558	no_overlap
chr2L	2450817	2451317	no_overlap
chr2L	2451354	2451854	no_overlap
chr2L	2454571	2455071	no_overlap
chr2L	2488375	2488875	early_iDRRE
chr2L	2492714	2493214	no_overlap
chr2L	2579630	2580130	no_overlap
chr2L	2580191	2580691	no_overlap
chr2L	2765237	2765737	no_overlap
chr2L	2765801	2766301	no_overlap
chr2L	2804577	2805077	early_iDRRE
chr2L	2829705	2830205	no_overlap
chr2L	2830544	2831044	no_overlap
chr2L	2873511	2874011	no_overlap
chr2L	2874561	2875061	no_overlap
chr2L	2885780	2886280	early_iDRRE
chr2L	2886482	2886982	early_iDRRE
chr2L	2976791	2977291	no_overlap
chr2L	2998660	2999160	no_overlap
chr2L	2999406	2999906	no_overlap
chr2L	3011136	3011636	no_overlap
chr2L	3037151	3037651	no_overlap
chr2L	3058532	3059032	no_overlap
chr2L	3059046	3059546	no_overlap
chr2L	3094945	3095445	early_iDRRE
chr2L	3107468	3107968	no_overlap
chr2L	3108017	3108517	no_overlap
chr2L	3158625	3159125	early_iDRRE
chr2L	3159263	3159763	early_iDRRE
chr2L	3172708	3173208	no_overlap
chr2L	3303091	3303591	no_overlap
chr2L	3346024	3346524	no_overlap
chr2L	3354620	3355120	no_overlap
chr2L	3478247	3478747	no_overlap
chr2L	3534349	3534849	no_overlap
chr2L	3538645	3539145	early_iDRRE_and_EL3DR
chr2L	3539468	3539968	EL3DR
chr2L	3580169	3580669	EL3DR
chr2L	3605805	3606305	no_overlap
chr2L	3606450	3606950	EL3DR
chr2L	3631985	3632485	EL3DR
chr2L	3632493	3632993	EL3DR
chr2L	3712602	3713102	no_overlap
chr2L	3713125	3713625	no_overlap
chr2L	3713650	3714150	no_overlap
chr2L	3770965	3771465	no_overlap
chr2L	3771702	3772202	no_overlap
chr2L	3772739	3773239	no_overlap
chr2L	3778417	3778917	no_overlap
chr2L	3780984	3781484	no_overlap
chr2L	3786290	3786790	no_overlap
chr2L	3786958	3787458	no_overlap
chr2L	3803446	3803946	no_overlap
chr2L	3888003	3888503	no_overlap
chr2L	3888517	3889017	no_overlap
chr2L	4031433	4031933	no_overlap
chr2L	4053731	4054231	early_iDRRE
chr2L	4197334	4197834	no_overlap
chr2L	4197938	4198438	no_overlap
chr2L	4282527	4283027	no_overlap
chr2L	4283188	4283688	no_overlap
chr2L	4332982	4333482	no_overlap
chr2L	4333722	4334222	no_overlap
chr2L	4588588	4589088	no_overlap
chr2L	4589150	4589650	no_overlap
chr2L	4614175	4614675	no_overlap
chr2L	4801719	4802219	no_overlap
chr2L	4810286	4810786	early_iDRRE
chr2L	4811237	4811737	no_overlap
chr2L	4891708	4892208	no_overlap
chr2L	4945225	4945725	no_overlap
chr2L	4997428	4997928	early_iDRRE
chr2L	5009068	5009568	no_overlap
chr2L	5009614	5010114	no_overlap
chr2L	5042801	5043301	no_overlap
chr2L	5043444	5043944	no_overlap
chr2L	5108316	5108816	no_overlap
chr2L	5144970	5145470	no_overlap
chr2L	5145842	5146342	no_overlap
chr2L	5236625	5237125	no_overlap
chr2L	5237218	5237718	no_overlap
chr2L	5240462	5240962	no_overlap
chr2L	5240996	5241496	no_overlap
chr2L	5253732	5254232	no_overlap
chr2L	5287789	5288289	no_overlap
chr2L	5305249	5305749	no_overlap
chr2L	5306199	5306699	early_iDRRE
chr2L	5306747	5307247	early_iDRRE
chr2L	5325871	5326371	no_overlap
chr2L	5326492	5326992	no_overlap
chr2L	5376391	5376891	no_overlap
chr2L	5403507	5404007	early_iDRRE_and_EL3DR
chr2L	5421534	5422034	early_iDRRE_and_EL3DR
chr2L	5461136	5461636	no_overlap
chr2L	5461817	5462317	no_overlap
chr2L	5542167	5542667	no_overlap
chr2L	5542791	5543291	no_overlap
chr2L	5724508	5725008	no_overlap
chr2L	5765947	5766447	no_overlap
chr2L	5799314	5799814	no_overlap
chr2L	5799840	5800340	no_overlap
chr2L	5805185	5805685	no_overlap
chr2L	5878676	5879176	early_iDRRE
chr2L	5879457	5879957	no_overlap
chr2L	5907007	5907507	early_iDRRE
chr2L	5943599	5944099	no_overlap
chr2L	5999150	5999650	no_overlap
chr2L	6047531	6048031	no_overlap
chr2L	6071022	6071522	no_overlap
chr2L	6087932	6088432	early_iDRRE
chr2L	6088488	6088988	early_iDRRE
chr2L	6098689	6099189	no_overlap
chr2L	6338374	6338874	no_overlap
chr2L	6338950	6339450	no_overlap
chr2L	6411039	6411539	no_overlap
chr2L	6411940	6412440	no_overlap
chr2L	6473284	6473784	no_overlap
chr2L	6480187	6480687	no_overlap
chr2L	6481158	6481658	no_overlap
chr2L	6611001	6611501	no_overlap
chr2L	6648307	6648807	no_overlap
chr2L	6649001	6649501	no_overlap
chr2L	6672567	6673067	no_overlap
chr2L	6673083	6673583	no_overlap
chr2L	6673824	6674324	no_overlap
chr2L	6684034	6684534	no_overlap
chr2L	6708788	6709288	no_overlap
chr2L	6722905	6723405	no_overlap
chr2L	6786253	6786753	no_overlap
chr2L	6786999	6787499	no_overlap
chr2L	6791964	6792464	early_iDRRE_and_EL3DR
chr2L	6793780	6794280	no_overlap
chr2L	6794458	6794958	no_overlap
chr2L	6948396	6948896	no_overlap
chr2L	6966357	6966857	early_iDRRE
chr2L	7009920	7010420	no_overlap
chr2L	7037885	7038385	early_iDRRE
chr2L	7038480	7038980	early_iDRRE
chr2L	7049115	7049615	no_overlap
chr2L	7049647	7050147	early_iDRRE
chr2L	7056592	7057092	early_iDRRE
chr2L	7187485	7187985	no_overlap
chr2L	7188092	7188592	no_overlap
chr2L	7188675	7189175	early_iDRRE
chr2L	7189458	7189958	no_overlap
chr2L	7306828	7307328	no_overlap
chr2L	7320020	7320520	no_overlap
chr2L	7325668	7326168	early_iDRRE
chr2L	7423557	7424057	no_overlap
chr2L	7437269	7437769	no_overlap
chr2L	7466231	7466731	no_overlap
chr2L	7495460	7495960	EL3DR
chr2L	7496080	7496580	EL3DR
chr2L	7529970	7530470	no_overlap
chr2L	7530481	7530981	no_overlap
chr2L	7576340	7576840	no_overlap
chr2L	7607912	7608412	no_overlap
chr2L	7702586	7703086	no_overlap
chr2L	7809532	7810032	no_overlap
chr2L	7811430	7811930	early_iDRRE
chr2L	7827527	7828027	no_overlap
chr2L	7828085	7828585	early_iDRRE
chr2L	7828784	7829284	early_iDRRE
chr2L	7868157	7868657	no_overlap
chr2L	7872549	7873049	no_overlap
chr2L	7879278	7879778	no_overlap
chr2L	7887145	7887645	early_iDRRE
chr2L	7909585	7910085	no_overlap
chr2L	7973423	7973923	early_iDRRE
chr2L	7994105	7994605	early_iDRRE
chr2L	7994690	7995190	early_iDRRE
chr2L	7998757	7999257	no_overlap
chr2L	8007076	8007576	no_overlap
chr2L	8030612	8031112	no_overlap
chr2L	8031443	8031943	early_iDRRE
chr2L	8071294	8071794	no_overlap
chr2L	8162062	8162562	no_overlap
chr2L	8162623	8163123	early_iDRRE
chr2L	8238650	8239150	early_iDRRE
chr2L	8239242	8239742	no_overlap
chr2L	8239796	8240296	no_overlap
chr2L	8280214	8280714	no_overlap
chr2L	8290459	8290959	no_overlap
chr2L	8291181	8291681	early_iDRRE
chr2L	8299471	8299971	early_iDRRE
chr2L	8326904	8327404	no_overlap
chr2L	8362738	8363238	no_overlap
chr2L	8370341	8370841	early_iDRRE
chr2L	8384061	8384561	no_overlap
chr2L	8403439	8403939	no_overlap
chr2L	8403941	8404441	no_overlap
chr2L	8415646	8416146	no_overlap
chr2L	8416495	8416995	early_iDRRE
chr2L	8478228	8478728	no_overlap
chr2L	8478913	8479413	early_iDRRE
chr2L	8528390	8528890	no_overlap
chr2L	8541434	8541934	no_overlap
chr2L	8541990	8542490	no_overlap
chr2L	8619777	8620277	no_overlap
chr2L	8708653	8709153	no_overlap
chr2L	8709209	8709709	no_overlap
chr2L	8718005	8718505	early_iDRRE
chr2L	8735529	8736029	no_overlap
chr2L	8825418	8825918	no_overlap
chr2L	8897806	8898306	no_overlap
chr2L	8898543	8899043	no_overlap
chr2L	8984644	8985144	no_overlap
chr2L	8985191	8985691	no_overlap
chr2L	8989001	8989501	no_overlap
chr2L	9166642	9167142	no_overlap
chr2L	9167212	9167712	no_overlap
chr2L	9176138	9176638	no_overlap
chr2L	9176774	9177274	no_overlap
chr2L	9182590	9183090	no_overlap
chr2L	9188761	9189261	no_overlap
chr2L	9205139	9205639	no_overlap
chr2L	9237486	9237986	early_iDRRE
chr2L	9387935	9388435	early_iDRRE
chr2L	9446449	9446949	no_overlap
chr2L	9449554	9450054	no_overlap
chr2L	9508483	9508983	no_overlap
chr2L	9520748	9521248	no_overlap
chr2L	9521341	9521841	no_overlap
chr2L	9522644	9523144	no_overlap
chr2L	9568148	9568648	early_iDRRE
chr2L	9568709	9569209	no_overlap
chr2L	9608018	9608518	no_overlap
chr2L	9698243	9698743	no_overlap
chr2L	9699074	9699574	no_overlap
chr2L	9699590	9700090	no_overlap
chr2L	9705165	9705665	early_iDRRE
chr2L	9705711	9706211	no_overlap
chr2L	9758247	9758747	no_overlap
chr2L	9782089	9782589	no_overlap
chr2L	9784035	9784535	early_iDRRE
chr2L	9790356	9790856	no_overlap
chr2L	9894795	9895295	no_overlap
chr2L	9915112	9915612	no_overlap
chr2L	9946014	9946514	early_iDRRE
chr2L	9947162	9947662	no_overlap
chr2L	9966888	9967388	no_overlap
chr2L	9967544	9968044	no_overlap
chr2L	10009837	10010337	early_iDRRE
chr2L	10032456	10032956	no_overlap
chr2L	10056713	10057213	no_overlap
chr2L	10057449	10057949	no_overlap
chr2L	10200839	10201339	no_overlap
chr2L	10226260	10226760	early_iDRRE
chr2L	10246660	10247160	no_overlap
chr2L	10250368	10250868	no_overlap
chr2L	10260809	10261309	no_overlap
chr2L	10277002	10277502	no_overlap
chr2L	10306493	10306993	no_overlap
chr2L	10334820	10335320	no_overlap
chr2L	10408161	10408661	no_overlap
chr2L	10426450	10426950	no_overlap
chr2L	10506488	10506988	early_iDRRE
chr2L	10507009	10507509	no_overlap
chr2L	10515882	10516382	early_iDRRE
chr2L	10516416	10516916	no_overlap
chr2L	10517011	10517511	no_overlap
chr2L	10661217	10661717	early_iDRRE
chr2L	10661845	10662345	no_overlap
chr2L	10676978	10677478	no_overlap
chr2L	10677509	10678009	no_overlap
chr2L	10750548	10751048	no_overlap
chr2L	10756965	10757465	early_iDRRE
chr2L	10767573	10768073	no_overlap
chr2L	10800850	10801350	no_overlap
chr2L	10801840	10802340	no_overlap
chr2L	10841596	10842096	no_overlap
chr2L	10842203	10842703	no_overlap
chr2L	10850597	10851097	no_overlap
chr2L	10967308	10967808	no_overlap
chr2L	10967821	10968321	no_overlap
chr2L	10976755	10977255	no_overlap
chr2L	11003776	11004276	no_overlap
chr2L	11059258	11059758	no_overlap
chr2L	11106614	11107114	no_overlap
chr2L	11184278	11184778	no_overlap
chr2L	11185003	11185503	early_iDRRE
chr2L	11210303	11210803	no_overlap
chr2L	11271642	11272142	no_overlap
chr2L	11358655	11359155	no_overlap
chr2L	11359190	11359690	no_overlap
chr2L	11447643	11448143	early_iDRRE
chr2L	11504726	11505226	no_overlap
chr2L	11516634	11517134	no_overlap
chr2L	11806321	11806821	no_overlap
chr2L	11806931	11807431	no_overlap
chr2L	11807759	11808259	no_overlap
chr2L	11813235	11813735	no_overlap
chr2L	11970812	11971312	no_overlap
chr2L	11989509	11990009	no_overlap
chr2L	12026235	12026735	no_overlap
chr2L	12055741	12056241	no_overlap
chr2L	12056415	12056915	no_overlap
chr2L	12103572	12104072	no_overlap
chr2L	12113193	12113693	no_overlap
chr2L	12133571	12134071	early_iDRRE
chr2L	12207546	12208046	no_overlap
chr2L	12366014	12366514	no_overlap
chr2L	12403774	12404274	no_overlap
chr2L	12404436	12404936	EL3DR
chr2L	12423610	12424110	no_overlap
chr2L	12434489	12434989	no_overlap
chr2L	12436322	12436822	no_overlap
chr2L	12461273	12461773	no_overlap
chr2L	12482682	12483182	early_iDRRE
chr2L	12483515	12484015	no_overlap
chr2L	12484086	12484586	no_overlap
chr2L	12507754	12508254	no_overlap
chr2L	12508320	12508820	no_overlap
chr2L	12514267	12514767	no_overlap
chr2L	12515139	12515639	no_overlap
chr2L	12545988	12546488	early_iDRRE_and_EL3DR
chr2L	12587251	12587751	no_overlap
chr2L	12635779	12636279	no_overlap
chr2L	12655688	12656188	early_iDRRE
chr2L	12657512	12658012	no_overlap
chr2L	12692373	12692873	no_overlap
chr2L	12852816	12853316	no_overlap
chr2L	12973966	12974466	no_overlap
chr2L	12974706	12975206	early_iDRRE
chr2L	13060029	13060529	no_overlap
chr2L	13137009	13137509	no_overlap
chr2L	13147440	13147940	no_overlap
chr2L	13164676	13165176	no_overlap
chr2L	13191240	13191740	no_overlap
chr2L	13203821	13204321	no_overlap
chr2L	13204418	13204918	no_overlap
chr2L	13205100	13205600	no_overlap
chr2L	13290690	13291190	early_iDRRE
chr2L	13295668	13296168	no_overlap
chr2L	13378516	13379016	no_overlap
chr2L	13512582	13513082	no_overlap
chr2L	13513180	13513680	no_overlap
chr2L	13548897	13549397	no_overlap
chr2L	13552634	13553134	no_overlap
chr2L	13570797	13571297	no_overlap
chr2L	13642331	13642831	no_overlap
chr2L	13665326	13665826	no_overlap
chr2L	13665886	13666386	no_overlap
chr2L	13835235	13835735	no_overlap
chr2L	13837390	13837890	early_iDRRE
chr2L	13878713	13879213	no_overlap
chr2L	13904060	13904560	no_overlap
chr2L	13904697	13905197	no_overlap
chr2L	14180601	14181101	no_overlap
chr2L	14225751	14226251	no_overlap
chr2L	14226368	14226868	no_overlap
chr2L	14233806	14234306	no_overlap
chr2L	14234375	14234875	no_overlap
chr2L	14300707	14301207	no_overlap
chr2L	14355049	14355549	early_iDRRE
chr2L	14409484	14409984	no_overlap
chr2L	14410149	14410649	early_iDRRE
chr2L	14460642	14461142	no_overlap
chr2L	14490323	14490823	no_overlap
chr2L	14689082	14689582	no_overlap
chr2L	14997254	14997754	no_overlap
chr2L	15035372	15035872	no_overlap
chr2L	15056846	15057346	no_overlap
chr2L	15108988	15109488	no_overlap
chr2L	15264511	15265011	no_overlap
chr2L	15270976	15271476	no_overlap
chr2L	15271656	15272156	no_overlap
chr2L	15334143	15334643	no_overlap
chr2L	15366423	15366923	early_iDRRE
chr2L	15375237	15375737	no_overlap
chr2L	15385723	15386223	no_overlap
chr2L	15386260	15386760	no_overlap
chr2L	15425683	15426183	no_overlap
chr2L	15498835	15499335	no_overlap
chr2L	15499512	15500012	no_overlap
chr2L	15761551	15762051	no_overlap
chr2L	15762316	15762816	no_overlap
chr2L	15908883	15909383	no_overlap
chr2L	15911597	15912097	no_overlap
chr2L	16306997	16307497	no_overlap
chr2L	16324751	16325251	early_iDRRE
chr2L	16325620	16326120	no_overlap
chr2L	16350767	16351267	early_iDRRE
chr2L	16351322	16351822	early_iDRRE
chr2L	16422614	16423114	early_iDRRE_and_EL3DR
chr2L	16477547	16478047	no_overlap
chr2L	16485922	16486422	EL3DR
chr2L	16491543	16492043	no_overlap
chr2L	16492554	16493054	early_iDRRE
chr2L	16519949	16520449	early_iDRRE_and_EL3DR
chr2L	16520751	16521251	early_iDRRE_and_EL3DR
chr2L	16525903	16526403	early_iDRRE
chr2L	16533072	16533572	early_iDRRE_and_EL3DR
chr2L	16601476	16601976	no_overlap
chr2L	16637280	16637780	no_overlap
chr2L	16679555	16680055	no_overlap
chr2L	16680273	16680773	no_overlap
chr2L	16685118	16685618	no_overlap
chr2L	16721250	16721750	early_iDRRE
chr2L	16742709	16743209	no_overlap
chr2L	16754116	16754616	no_overlap
chr2L	16806820	16807320	no_overlap
chr2L	16817066	16817566	no_overlap
chr2L	16824824	16825324	no_overlap
chr2L	16880927	16881427	no_overlap
chr2L	16887646	16888146	no_overlap
chr2L	17383742	17384242	no_overlap
chr2L	17429682	17430182	no_overlap
chr2L	17430784	17431284	early_iDRRE
chr2L	17449217	17449717	no_overlap
chr2L	17450686	17451186	early_iDRRE
chr2L	17963136	17963636	no_overlap
chr2L	18012144	18012644	no_overlap
chr2L	18141655	18142155	no_overlap
chr2L	18150277	18150777	no_overlap
chr2L	18310933	18311433	no_overlap
chr2L	18311731	18312231	no_overlap
chr2L	18312251	18312751	no_overlap
chr2L	18319881	18320381	no_overlap
chr2L	18320426	18320926	no_overlap
chr2L	18327143	18327643	no_overlap
chr2L	18485291	18485791	early_iDRRE
chr2L	18517163	18517663	no_overlap
chr2L	18562479	18562979	early_iDRRE
chr2L	18562980	18563480	no_overlap
chr2L	18571287	18571787	no_overlap
chr2L	18571966	18572466	no_overlap
chr2L	18640556	18641056	no_overlap
chr2L	18707988	18708488	early_iDRRE
chr2L	18708723	18709223	no_overlap
chr2L	18732276	18732776	no_overlap
chr2L	18732827	18733327	no_overlap
chr2L	18743061	18743561	early_iDRRE
chr2L	18743611	18744111	early_iDRRE
chr2L	18795744	18796244	EL3DR
chr2L	18796528	18797028	EL3DR
chr2L	18823374	18823874	no_overlap
chr2L	18830837	18831337	no_overlap
chr2L	18839266	18839766	early_iDRRE
chr2L	18881275	18881775	no_overlap
chr2L	18947470	18947970	no_overlap
chr2L	18986945	18987445	no_overlap
chr2L	18987562	18988062	no_overlap
chr2L	19003096	19003596	no_overlap
chr2L	19008419	19008919	no_overlap
chr2L	19008940	19009440	no_overlap
chr2L	19053721	19054221	no_overlap
chr2L	19054298	19054798	no_overlap
chr2L	19111672	19112172	no_overlap
chr2L	19134888	19135388	no_overlap
chr2L	19158112	19158612	early_iDRRE
chr2L	19161379	19161879	early_iDRRE
chr2L	19190094	19190594	no_overlap
chr2L	19362839	19363339	no_overlap
chr2L	19397508	19398008	no_overlap
chr2L	19398140	19398640	no_overlap
chr2L	19398726	19399226	early_iDRRE
chr2L	19424954	19425454	early_iDRRE
chr2L	19438730	19439230	no_overlap
chr2L	19439239	19439739	no_overlap
chr2L	19444637	19445137	early_iDRRE
chr2L	19508400	19508900	EL3DR
chr2L	19549564	19550064	no_overlap
chr2L	19571679	19572179	no_overlap
chr2L	19575065	19575565	no_overlap
chr2L	19735616	19736116	no_overlap
chr2L	19756595	19757095	no_overlap
chr2L	19790917	19791417	no_overlap
chr2L	19791535	19792035	no_overlap
chr2L	19935041	19935541	no_overlap
chr2L	19935633	19936133	no_overlap
chr2L	20061070	20061570	early_iDRRE
chr2L	20075135	20075635	no_overlap
chr2L	20084235	20084735	no_overlap
chr2L	20084806	20085306	no_overlap
chr2L	20104545	20105045	early_iDRRE
chr2L	20115663	20116163	no_overlap
chr2L	20148413	20148913	early_iDRRE
chr2L	20310829	20311329	early_iDRRE
chr2L	20416621	20417121	early_iDRRE
chr2L	20417286	20417786	no_overlap
chr2L	20428724	20429224	no_overlap
chr2L	20645311	20645811	no_overlap
chr2L	20694777	20695277	early_iDRRE
chr2L	20700415	20700915	no_overlap
chr2L	20716044	20716544	no_overlap
chr2L	20735238	20735738	no_overlap
chr2L	20794227	20794727	no_overlap
chr2L	20807850	20808350	no_overlap
chr2L	20808408	20808908	no_overlap
chr2L	20821878	20822378	no_overlap
chr2L	20822672	20823172	no_overlap
chr2L	20823599	20824099	no_overlap
chr2L	20829581	20830081	no_overlap
chr2L	20911158	20911658	no_overlap
chr2L	21009192	21009692	no_overlap
chr2L	21009694	21010194	no_overlap
chr2L	21019651	21020151	no_overlap
chr2L	21051829	21052329	no_overlap
chr2L	21101764	21102264	no_overlap
chr2L	21102317	21102817	no_overlap
chr2L	21167950	21168450	no_overlap
chr2L	21168465	21168965	no_overlap
chr2L	21179154	21179654	no_overlap
chr2L	21179807	21180307	no_overlap
chr2L	21218401	21218901	no_overlap
chr2L	21244005	21244505	early_iDRRE
chr2L	21250580	21251080	early_iDRRE
chr2L	21262794	21263294	no_overlap
chr2L	21296122	21296622	no_overlap
chr2L	21310902	21311402	no_overlap
chr2L	21343887	21344387	early_iDRRE
chr2L	21344472	21344972	no_overlap
chr2L	21397116	21397616	early_iDRRE
chr2L	21618705	21619205	EL3DR
chr2L	21628563	21629063	no_overlap
chr2L	21629102	21629602	no_overlap
chr2L	21629616	21630116	no_overlap
chr2L	21683585	21684085	no_overlap
chr2L	21828104	21828604	no_overlap
chr2L	21828654	21829154	no_overlap
chr2L	21899272	21899772	no_overlap
chr2L	22018946	22019446	no_overlap
chr2L	22024325	22024825	no_overlap
chr2L	22121702	22122202	no_overlap
chr2L	22133943	22134443	no_overlap
chr2L	22134700	22135200	no_overlap
chr2L	22247282	22247782	no_overlap
chr2L	22549987	22550487	no_overlap
chr2L	22981970	22982470	no_overlap
chr2L	23068039	23068539	no_overlap
chr2L	23172786	23173286	no_overlap
chr2L	23173995	23174495	no_overlap
chr2R	1071336	1071836	early_iDRRE
chr2R	1071854	1072354	no_overlap
chr2R	1243258	1243758	early_iDRRE
chr2R	1264080	1264580	no_overlap
chr2R	1590067	1590567	no_overlap
chr2R	1590585	1591085	no_overlap
chr2R	1591166	1591666	no_overlap
chr2R	2564868	2565368	no_overlap
chr2R	2565371	2565871	no_overlap
chr2R	2846349	2846849	no_overlap
chr2R	4187453	4187953	no_overlap
chr2R	4187956	4188456	no_overlap
chr2R	4516240	4516740	no_overlap
chr2R	4618738	4619238	no_overlap
chr2R	4619246	4619746	no_overlap
chr2R	4744286	4744786	no_overlap
chr2R	4782828	4783328	early_iDRRE
chr2R	4783367	4783867	early_iDRRE
chr2R	4788003	4788503	no_overlap
chr2R	4788518	4789018	no_overlap
chr2R	4823533	4824033	no_overlap
chr2R	5090385	5090885	no_overlap
chr2R	5091091	5091591	no_overlap
chr2R	5259254	5259754	no_overlap
chr2R	5293766	5294266	no_overlap
chr2R	5307128	5307628	no_overlap
chr2R	5307751	5308251	no_overlap
chr2R	5350204	5350704	no_overlap
chr2R	5350782	5351282	no_overlap
chr2R	5362980	5363480	no_overlap
chr2R	5416531	5417031	early_iDRRE
chr2R	5494979	5495479	early_iDRRE
chr2R	5495568	5496068	no_overlap
chr2R	5496398	5496898	no_overlap
chr2R	5603936	5604436	no_overlap
chr2R	5604604	5605104	no_overlap
chr2R	5608599	5609099	no_overlap
chr2R	5662928	5663428	no_overlap
chr2R	5690855	5691355	no_overlap
chr2R	5691617	5692117	no_overlap
chr2R	5702003	5702503	no_overlap
chr2R	5726180	5726680	no_overlap
chr2R	5726766	5727266	no_overlap
chr2R	5782335	5782835	no_overlap
chr2R	5893570	5894070	no_overlap
chr2R	5981703	5982203	early_iDRRE
chr2R	5982234	5982734	early_iDRRE
chr2R	5992783	5993283	no_overlap
chr2R	5993565	5994065	early_iDRRE
chr2R	5994068	5994568	early_iDRRE
chr2R	5998782	5999282	no_overlap
chr2R	5999412	5999912	no_overlap
chr2R	6015607	6016107	no_overlap
chr2R	6035494	6035994	no_overlap
chr2R	6036274	6036774	no_overlap
chr2R	6088990	6089490	no_overlap
chr2R	6125282	6125782	early_iDRRE
chr2R	6131800	6132300	no_overlap
chr2R	6147020	6147520	no_overlap
chr2R	6147987	6148487	no_overlap
chr2R	6171367	6171867	no_overlap
chr2R	6221037	6221537	no_overlap
chr2R	6241241	6241741	no_overlap
chr2R	6241858	6242358	no_overlap
chr2R	6245071	6245571	no_overlap
chr2R	6501006	6501506	no_overlap
chr2R	6501510	6502010	no_overlap
chr2R	6514377	6514877	no_overlap
chr2R	6610227	6610727	no_overlap
chr2R	6630084	6630584	no_overlap
chr2R	6631499	6631999	no_overlap
chr2R	6648224	6648724	no_overlap
chr2R	6649015	6649515	no_overlap
chr2R	6661876	6662376	early_iDRRE
chr2R	6662828	6663328	early_iDRRE
chr2R	6695934	6696434	no_overlap
chr2R	6696497	6696997	no_overlap
chr2R	6715248	6715748	no_overlap
chr2R	6715754	6716254	early_iDRRE
chr2R	6742128	6742628	early_iDRRE
chr2R	6811174	6811674	no_overlap
chr2R	6871638	6872138	no_overlap
chr2R	6872548	6873048	no_overlap
chr2R	6878366	6878866	no_overlap
chr2R	6885519	6886019	no_overlap
chr2R	6886100	6886600	no_overlap
chr2R	6970780	6971280	no_overlap
chr2R	6971293	6971793	no_overlap
chr2R	6984953	6985453	no_overlap
chr2R	6985494	6985994	no_overlap
chr2R	6992489	6992989	no_overlap
chr2R	6994204	6994704	no_overlap
chr2R	6994906	6995406	no_overlap
chr2R	7012269	7012769	no_overlap
chr2R	7013096	7013596	no_overlap
chr2R	7024828	7025328	no_overlap
chr2R	7044997	7045497	no_overlap
chr2R	7045589	7046089	no_overlap
chr2R	7048814	7049314	no_overlap
chr2R	7049430	7049930	no_overlap
chr2R	7086120	7086620	no_overlap
chr2R	7086681	7087181	no_overlap
chr2R	7106423	7106923	no_overlap
chr2R	7150487	7150987	no_overlap
chr2R	7158051	7158551	no_overlap
chr2R	7186845	7187345	no_overlap
chr2R	7261626	7262126	early_iDRRE
chr2R	7289552	7290052	early_iDRRE
chr2R	7370364	7370864	early_iDRRE
chr2R	7371084	7371584	no_overlap
chr2R	7381583	7382083	no_overlap
chr2R	7386968	7387468	early_iDRRE
chr2R	7406942	7407442	no_overlap
chr2R	7407547	7408047	no_overlap
chr2R	7418424	7418924	early_iDRRE
chr2R	7419066	7419566	no_overlap
chr2R	7429260	7429760	no_overlap
chr2R	7473437	7473937	no_overlap
chr2R	7473986	7474486	no_overlap
chr2R	7488640	7489140	no_overlap
chr2R	7492737	7493237	no_overlap
chr2R	7532782	7533282	no_overlap
chr2R	7533325	7533825	no_overlap
chr2R	7566381	7566881	no_overlap
chr2R	7584120	7584620	no_overlap
chr2R	7587035	7587535	early_iDRRE
chr2R	7622791	7623291	no_overlap
chr2R	7632578	7633078	no_overlap
chr2R	7665771	7666271	no_overlap
chr2R	7698500	7699000	no_overlap
chr2R	7699119	7699619	no_overlap
chr2R	7722706	7723206	early_iDRRE
chr2R	7734680	7735180	no_overlap
chr2R	7735181	7735681	no_overlap
chr2R	7735732	7736232	no_overlap
chr2R	7745166	7745666	no_overlap
chr2R	7746634	7747134	early_iDRRE
chr2R	7758722	7759222	no_overlap
chr2R	7805400	7805900	no_overlap
chr2R	7805973	7806473	no_overlap
chr2R	7806657	7807157	no_overlap
chr2R	7812206	7812706	no_overlap
chr2R	7915898	7916398	no_overlap
chr2R	7916408	7916908	no_overlap
chr2R	7917140	7917640	early_iDRRE
chr2R	7983909	7984409	no_overlap
chr2R	7989420	7989920	no_overlap
chr2R	8030858	8031358	no_overlap
chr2R	8060573	8061073	no_overlap
chr2R	8068021	8068521	early_iDRRE
chr2R	8068860	8069360	no_overlap
chr2R	8083023	8083523	no_overlap
chr2R	8106281	8106781	no_overlap
chr2R	8122126	8122626	early_iDRRE
chr2R	8122746	8123246	no_overlap
chr2R	8131229	8131729	no_overlap
chr2R	8145068	8145568	early_iDRRE
chr2R	8145668	8146168	no_overlap
chr2R	8146345	8146845	no_overlap
chr2R	8151970	8152470	no_overlap
chr2R	8155930	8156430	no_overlap
chr2R	8173964	8174464	no_overlap
chr2R	8174493	8174993	no_overlap
chr2R	8230911	8231411	no_overlap
chr2R	8232153	8232653	no_overlap
chr2R	8236818	8237318	no_overlap
chr2R	8237394	8237894	no_overlap
chr2R	8241840	8242340	early_iDRRE
chr2R	8293636	8294136	early_iDRRE
chr2R	8326969	8327469	no_overlap
chr2R	8444486	8444986	no_overlap
chr2R	8572501	8573001	no_overlap
chr2R	8614954	8615454	no_overlap
chr2R	8647494	8647994	early_iDRRE
chr2R	8649316	8649816	no_overlap
chr2R	8665371	8665871	no_overlap
chr2R	8666020	8666520	no_overlap
chr2R	8670281	8670781	no_overlap
chr2R	8724524	8725024	no_overlap
chr2R	8725298	8725798	no_overlap
chr2R	8737025	8737525	no_overlap
chr2R	8798189	8798689	no_overlap
chr2R	8901422	8901922	no_overlap
chr2R	8928041	8928541	no_overlap
chr2R	8951571	8952071	no_overlap
chr2R	8952156	8952656	no_overlap
chr2R	8985585	8986085	no_overlap
chr2R	9005321	9005821	no_overlap
chr2R	9030760	9031260	no_overlap
chr2R	9115982	9116482	no_overlap
chr2R	9116759	9117259	no_overlap
chr2R	9121966	9122466	no_overlap
chr2R	9130443	9130943	early_iDRRE
chr2R	9143284	9143784	no_overlap
chr2R	9143834	9144334	no_overlap
chr2R	9189707	9190207	no_overlap
chr2R	9207435	9207935	no_overlap
chr2R	9230981	9231481	no_overlap
chr2R	9284229	9284729	early_iDRRE
chr2R	9284734	9285234	no_overlap
chr2R	9292356	9292856	no_overlap
chr2R	9307709	9308209	early_iDRRE
chr2R	9308338	9308838	early_iDRRE
chr2R	9389600	9390100	no_overlap
chr2R	9390247	9390747	early_iDRRE
chr2R	9408536	9409036	no_overlap
chr2R	9409137	9409637	no_overlap
chr2R	9426435	9426935	early_iDRRE_and_EL3DR
chr2R	9427002	9427502	early_iDRRE_and_EL3DR
chr2R	9440546	9441046	no_overlap
chr2R	9441361	9441861	no_overlap
chr2R	9442002	9442502	no_overlap
chr2R	9546584	9547084	no_overlap
chr2R	9551776	9552276	no_overlap
chr2R	9552467	9552967	no_overlap
chr2R	9553187	9553687	no_overlap
chr2R	9565634	9566134	early_iDRRE
chr2R	9577590	9578090	no_overlap
chr2R	9578101	9578601	no_overlap
chr2R	9578652	9579152	early_iDRRE
chr2R	9691810	9692310	no_overlap
chr2R	9692674	9693174	no_overlap
chr2R	9693199	9693699	early_iDRRE
chr2R	9712104	9712604	no_overlap
chr2R	9712659	9713159	no_overlap
chr2R	9813592	9814092	no_overlap
chr2R	9814199	9814699	no_overlap
chr2R	9819881	9820381	no_overlap
chr2R	9860357	9860857	no_overlap
chr2R	9875071	9875571	no_overlap
chr2R	9910740	9911240	no_overlap
chr2R	9949486	9949986	early_iDRRE
chr2R	9954948	9955448	early_iDRRE
chr2R	9958088	9958588	no_overlap
chr2R	9958793	9959293	no_overlap
chr2R	9988261	9988761	early_iDRRE
chr2R	9989138	9989638	early_iDRRE
chr2R	10025017	10025517	early_iDRRE
chr2R	10025558	10026058	early_iDRRE
chr2R	10026375	10026875	no_overlap
chr2R	10048241	10048741	no_overlap
chr2R	10056486	10056986	no_overlap
chr2R	10066431	10066931	no_overlap
chr2R	10096689	10097189	no_overlap
chr2R	10110740	10111240	early_iDRRE
chr2R	10123829	10124329	no_overlap
chr2R	10124434	10124934	early_iDRRE
chr2R	10134881	10135381	no_overlap
chr2R	10159646	10160146	no_overlap
chr2R	10210996	10211496	no_overlap
chr2R	10213906	10214406	no_overlap
chr2R	10227828	10228328	no_overlap
chr2R	10238350	10238850	no_overlap
chr2R	10271453	10271953	no_overlap
chr2R	10302582	10303082	no_overlap
chr2R	10309656	10310156	no_overlap
chr2R	10421078	10421578	no_overlap
chr2R	10423898	10424398	no_overlap
chr2R	10429597	10430097	no_overlap
chr2R	10430104	10430604	no_overlap
chr2R	10437867	10438367	no_overlap
chr2R	10475281	10475781	no_overlap
chr2R	10534765	10535265	no_overlap
chr2R	10538021	10538521	no_overlap
chr2R	10544922	10545422	early_iDRRE
chr2R	10557556	10558056	early_iDRRE
chr2R	10558137	10558637	no_overlap
chr2R	10564136	10564636	early_iDRRE
chr2R	10564807	10565307	no_overlap
chr2R	10566541	10567041	early_iDRRE
chr2R	10568531	10569031	no_overlap
chr2R	10569054	10569554	no_overlap
chr2R	10583179	10583679	no_overlap
chr2R	10583715	10584215	no_overlap
chr2R	10596202	10596702	early_iDRRE
chr2R	10596771	10597271	early_iDRRE
chr2R	10600949	10601449	no_overlap
chr2R	10617383	10617883	no_overlap
chr2R	10618311	10618811	early_iDRRE
chr2R	10673113	10673613	no_overlap
chr2R	10674743	10675243	no_overlap
chr2R	10731255	10731755	no_overlap
chr2R	10782022	10782522	no_overlap
chr2R	10782554	10783054	no_overlap
chr2R	10807179	10807679	early_iDRRE
chr2R	10813469	10813969	no_overlap
chr2R	10819642	10820142	no_overlap
chr2R	10873769	10874269	no_overlap
chr2R	10874334	10874834	no_overlap
chr2R	10941492	10941992	no_overlap
chr2R	10942027	10942527	no_overlap
chr2R	11046810	11047310	no_overlap
chr2R	11173450	11173950	no_overlap
chr2R	11188491	11188991	early_iDRRE
chr2R	11194301	11194801	no_overlap
chr2R	11194952	11195452	early_iDRRE
chr2R	11202266	11202766	early_iDRRE
chr2R	11203193	11203693	no_overlap
chr2R	11203721	11204221	no_overlap
chr2R	11284065	11284565	no_overlap
chr2R	11289122	11289622	early_iDRRE
chr2R	11289689	11290189	early_iDRRE
chr2R	11307051	11307551	no_overlap
chr2R	11307713	11308213	no_overlap
chr2R	11364269	11364769	early_iDRRE
chr2R	11364923	11365423	early_iDRRE
chr2R	11365874	11366374	early_iDRRE
chr2R	11384500	11385000	no_overlap
chr2R	11387938	11388438	no_overlap
chr2R	11388581	11389081	no_overlap
chr2R	11404447	11404947	no_overlap
chr2R	11405045	11405545	no_overlap
chr2R	11451818	11452318	no_overlap
chr2R	11452388	11452888	no_overlap
chr2R	11452958	11453458	early_iDRRE
chr2R	11475997	11476497	no_overlap
chr2R	11491942	11492442	no_overlap
chr2R	11499467	11499967	no_overlap
chr2R	11527959	11528459	no_overlap
chr2R	11541984	11542484	early_iDRRE
chr2R	11550181	11550681	early_iDRRE
chr2R	11561521	11562021	no_overlap
chr2R	11607147	11607647	early_iDRRE
chr2R	11607772	11608272	early_iDRRE
chr2R	11614045	11614545	early_iDRRE
chr2R	11625776	11626276	early_iDRRE
chr2R	11626285	11626785	early_iDRRE
chr2R	11637307	11637807	early_iDRRE
chr2R	11652288	11652788	no_overlap
chr2R	11665368	11665868	no_overlap
chr2R	11690439	11690939	no_overlap
chr2R	11890611	11891111	no_overlap
chr2R	11891956	11892456	no_overlap
chr2R	11892931	11893431	early_iDRRE
chr2R	11939207	11939707	no_overlap
chr2R	12019654	12020154	no_overlap
chr2R	12024426	12024926	no_overlap
chr2R	12024937	12025437	no_overlap
chr2R	12033880	12034380	no_overlap
chr2R	12044450	12044950	no_overlap
chr2R	12150167	12150667	no_overlap
chr2R	12150675	12151175	no_overlap
chr2R	12168548	12169048	no_overlap
chr2R	12173430	12173930	early_iDRRE
chr2R	12173954	12174454	early_iDRRE
chr2R	12229060	12229560	no_overlap
chr2R	12252748	12253248	no_overlap
chr2R	12261369	12261869	no_overlap
chr2R	12333915	12334415	no_overlap
chr2R	12343645	12344145	no_overlap
chr2R	12344339	12344839	no_overlap
chr2R	12344860	12345360	no_overlap
chr2R	12437166	12437666	early_iDRRE
chr2R	12452991	12453491	no_overlap
chr2R	12453748	12454248	no_overlap
chr2R	12454281	12454781	no_overlap
chr2R	12506696	12507196	no_overlap
chr2R	12507481	12507981	no_overlap
chr2R	12528931	12529431	early_iDRRE
chr2R	12612243	12612743	no_overlap
chr2R	12612845	12613345	no_overlap
chr2R	12636386	12636886	no_overlap
chr2R	12679330	12679830	no_overlap
chr2R	12704989	12705489	no_overlap
chr2R	12716768	12717268	no_overlap
chr2R	12780296	12780796	no_overlap
chr2R	12786499	12786999	no_overlap
chr2R	12871924	12872424	no_overlap
chr2R	12879165	12879665	no_overlap
chr2R	12879708	12880208	no_overlap
chr2R	12888293	12888793	no_overlap
chr2R	12888861	12889361	no_overlap
chr2R	12889393	12889893	no_overlap
chr2R	12904120	12904620	no_overlap
chr2R	12915868	12916368	no_overlap
chr2R	12936231	12936731	early_iDRRE
chr2R	12936787	12937287	no_overlap
chr2R	12946083	12946583	no_overlap
chr2R	12946834	12947334	no_overlap
chr2R	12955837	12956337	early_iDRRE
chr2R	12979876	12980376	no_overlap
chr2R	12980615	12981115	no_overlap
chr2R	12985220	12985720	no_overlap
chr2R	12996248	12996748	no_overlap
chr2R	12997129	12997629	no_overlap
chr2R	13015528	13016028	early_iDRRE
chr2R	13032013	13032513	no_overlap
chr2R	13041969	13042469	early_iDRRE
chr2R	13171304	13171804	no_overlap
chr2R	13223082	13223582	no_overlap
chr2R	13223937	13224437	early_iDRRE
chr2R	13337214	13337714	no_overlap
chr2R	13429918	13430418	no_overlap
chr2R	13431656	13432156	no_overlap
chr2R	13437720	13438220	no_overlap
chr2R	13438283	13438783	no_overlap
chr2R	13439083	13439583	no_overlap
chr2R	13449864	13450364	no_overlap
chr2R	13450400	13450900	no_overlap
chr2R	13464047	13464547	early_iDRRE
chr2R	13476218	13476718	no_overlap
chr2R	13482839	13483339	no_overlap
chr2R	13494767	13495267	no_overlap
chr2R	13499721	13500221	no_overlap
chr2R	13502094	13502594	early_iDRRE
chr2R	13502713	13503213	no_overlap
chr2R	13539666	13540166	no_overlap
chr2R	13540300	13540800	no_overlap
chr2R	13557842	13558342	early_iDRRE
chr2R	13592940	13593440	early_iDRRE
chr2R	13593528	13594028	no_overlap
chr2R	13823661	13824161	early_iDRRE
chr2R	13824189	13824689	early_iDRRE
chr2R	13897555	13898055	no_overlap
chr2R	13910920	13911420	no_overlap
chr2R	13919417	13919917	early_iDRRE
chr2R	13925216	13925716	no_overlap
chr2R	13941790	13942290	no_overlap
chr2R	13956836	13957336	no_overlap
chr2R	13964294	13964794	no_overlap
chr2R	13978341	13978841	no_overlap
chr2R	13994206	13994706	no_overlap
chr2R	14000736	14001236	early_iDRRE
chr2R	14006730	14007230	no_overlap
chr2R	14008275	14008775	early_iDRRE
chr2R	14026993	14027493	no_overlap
chr2R	14074385	14074885	no_overlap
chr2R	14074976	14075476	no_overlap
chr2R	14140018	14140518	early_iDRRE
chr2R	14140729	14141229	no_overlap
chr2R	14141340	14141840	early_iDRRE
chr2R	14152330	14152830	no_overlap
chr2R	14152964	14153464	no_overlap
chr2R	14173503	14174003	no_overlap
chr2R	14174570	14175070	no_overlap
chr2R	14184402	14184902	no_overlap
chr2R	14184978	14185478	no_overlap
chr2R	14185605	14186105	no_overlap
chr2R	14186345	14186845	no_overlap
chr2R	14205494	14205994	no_overlap
chr2R	14206048	14206548	no_overlap
chr2R	14211946	14212446	no_overlap
chr2R	14212577	14213077	no_overlap
chr2R	14219845	14220345	no_overlap
chr2R	14220858	14221358	no_overlap
chr2R	14265362	14265862	no_overlap
chr2R	14270452	14270952	no_overlap
chr2R	14307145	14307645	no_overlap
chr2R	14307915	14308415	no_overlap
chr2R	14315412	14315912	no_overlap
chr2R	14331584	14332084	no_overlap
chr2R	14332163	14332663	no_overlap
chr2R	14362919	14363419	no_overlap
chr2R	14458028	14458528	no_overlap
chr2R	14484902	14485402	early_iDRRE
chr2R	14490317	14490817	no_overlap
chr2R	14503672	14504172	early_iDRRE
chr2R	14504296	14504796	no_overlap
chr2R	14526095	14526595	no_overlap
chr2R	14526616	14527116	early_iDRRE
chr2R	14575328	14575828	no_overlap
chr2R	14618905	14619405	no_overlap
chr2R	14644616	14645116	early_iDRRE
chr2R	14645135	14645635	no_overlap
chr2R	14713299	14713799	no_overlap
chr2R	14752125	14752625	no_overlap
chr2R	14799213	14799713	early_iDRRE
chr2R	14870508	14871008	early_iDRRE
chr2R	14884428	14884928	no_overlap
chr2R	14928113	14928613	no_overlap
chr2R	14962516	14963016	early_iDRRE
chr2R	14964499	14964999	early_iDRRE
chr2R	14965179	14965679	no_overlap
chr2R	14965701	14966201	no_overlap
chr2R	14981040	14981540	no_overlap
chr2R	14986746	14987246	no_overlap
chr2R	15010519	15011019	no_overlap
chr2R	15011116	15011616	no_overlap
chr2R	15027230	15027730	no_overlap
chr2R	15053958	15054458	no_overlap
chr2R	15117267	15117767	no_overlap
chr2R	15118108	15118608	no_overlap
chr2R	15130106	15130606	no_overlap
chr2R	15130702	15131202	no_overlap
chr2R	15252575	15253075	no_overlap
chr2R	15308623	15309123	no_overlap
chr2R	15309139	15309639	no_overlap
chr2R	15322045	15322545	no_overlap
chr2R	15322700	15323200	no_overlap
chr2R	15349334	15349834	early_iDRRE
chr2R	15349923	15350423	no_overlap
chr2R	15380613	15381113	early_iDRRE
chr2R	15381279	15381779	no_overlap
chr2R	15497041	15497541	no_overlap
chr2R	15511579	15512079	no_overlap
chr2R	15613376	15613876	no_overlap
chr2R	15675389	15675889	no_overlap
chr2R	15675946	15676446	no_overlap
chr2R	15735022	15735522	no_overlap
chr2R	15735524	15736024	no_overlap
chr2R	15762155	15762655	no_overlap
chr2R	15816591	15817091	no_overlap
chr2R	15817114	15817614	early_iDRRE
chr2R	15848441	15848941	no_overlap
chr2R	15860855	15861355	no_overlap
chr2R	15861441	15861941	no_overlap
chr2R	15899120	15899620	early_iDRRE
chr2R	15921851	15922351	no_overlap
chr2R	15931331	15931831	no_overlap
chr2R	16000922	16001422	early_iDRRE
chr2R	16017546	16018046	no_overlap
chr2R	16018096	16018596	no_overlap
chr2R	16098330	16098830	no_overlap
chr2R	16098840	16099340	no_overlap
chr2R	16102251	16102751	no_overlap
chr2R	16102906	16103406	no_overlap
chr2R	16124804	16125304	no_overlap
chr2R	16125480	16125980	no_overlap
chr2R	16129858	16130358	early_iDRRE
chr2R	16135579	16136079	no_overlap
chr2R	16155714	16156214	early_iDRRE
chr2R	16156255	16156755	early_iDRRE
chr2R	16178643	16179143	no_overlap
chr2R	16180473	16180973	no_overlap
chr2R	16219013	16219513	no_overlap
chr2R	16219528	16220028	no_overlap
chr2R	16226202	16226702	no_overlap
chr2R	16271130	16271630	no_overlap
chr2R	16335854	16336354	no_overlap
chr2R	16336490	16336990	early_iDRRE
chr2R	16337042	16337542	no_overlap
chr2R	16386345	16386845	no_overlap
chr2R	16551979	16552479	no_overlap
chr2R	16583220	16583720	no_overlap
chr2R	16583769	16584269	no_overlap
chr2R	16585711	16586211	early_iDRRE
chr2R	16611683	16612183	no_overlap
chr2R	16724996	16725496	early_iDRRE
chr2R	16731132	16731632	no_overlap
chr2R	16810646	16811146	no_overlap
chr2R	16830405	16830905	no_overlap
chr2R	16856160	16856660	no_overlap
chr2R	16856855	16857355	no_overlap
chr2R	16955311	16955811	no_overlap
chr2R	17004766	17005266	no_overlap
chr2R	17005289	17005789	no_overlap
chr2R	17026402	17026902	no_overlap
chr2R	17026970	17027470	no_overlap
chr2R	17027562	17028062	early_iDRRE
chr2R	17097279	17097779	no_overlap
chr2R	17143852	17144352	no_overlap
chr2R	17262116	17262616	no_overlap
chr2R	17262682	17263182	no_overlap
chr2R	17391364	17391864	no_overlap
chr2R	17392064	17392564	no_overlap
chr2R	17420166	17420666	early_iDRRE
chr2R	17420684	17421184	early_iDRRE
chr2R	17421199	17421699	early_iDRRE
chr2R	17444580	17445080	no_overlap
chr2R	17452196	17452696	no_overlap
chr2R	17458345	17458845	no_overlap
chr2R	17461794	17462294	no_overlap
chr2R	17469144	17469644	no_overlap
chr2R	17469729	17470229	no_overlap
chr2R	17499480	17499980	no_overlap
chr2R	17502289	17502789	no_overlap
chr2R	17509106	17509606	no_overlap
chr2R	17535284	17535784	no_overlap
chr2R	17568051	17568551	no_overlap
chr2R	17568632	17569132	early_iDRRE
chr2R	17592344	17592844	no_overlap
chr2R	17592864	17593364	no_overlap
chr2R	17638861	17639361	no_overlap
chr2R	17682416	17682916	no_overlap
chr2R	17683082	17683582	no_overlap
chr2R	17698341	17698841	early_iDRRE
chr2R	17717177	17717677	no_overlap
chr2R	17760943	17761443	no_overlap
chr2R	17789002	17789502	no_overlap
chr2R	17801800	17802300	early_iDRRE
chr2R	17803938	17804438	early_iDRRE
chr2R	17822273	17822773	early_iDRRE
chr2R	17823350	17823850	no_overlap
chr2R	17851186	17851686	no_overlap
chr2R	17868970	17869470	early_iDRRE
chr2R	17927078	17927578	no_overlap
chr2R	18108195	18108695	no_overlap
chr2R	18125868	18126368	no_overlap
chr2R	18133737	18134237	no_overlap
chr2R	18134263	18134763	no_overlap
chr2R	18141468	18141968	no_overlap
chr2R	18142014	18142514	no_overlap
chr2R	18151645	18152145	no_overlap
chr2R	18156749	18157249	no_overlap
chr2R	18157334	18157834	no_overlap
chr2R	18157868	18158368	no_overlap
chr2R	18171440	18171940	no_overlap
chr2R	18179851	18180351	early_iDRRE
chr2R	18223796	18224296	no_overlap
chr2R	18242117	18242617	no_overlap
chr2R	18277025	18277525	no_overlap
chr2R	18291248	18291748	no_overlap
chr2R	18307814	18308314	early_iDRRE
chr2R	18329675	18330175	no_overlap
chr2R	18356137	18356637	no_overlap
chr2R	18357357	18357857	early_iDRRE
chr2R	18397888	18398388	no_overlap
chr2R	18413524	18414024	no_overlap
chr2R	18422733	18423233	no_overlap
chr2R	18439607	18440107	no_overlap
chr2R	18440109	18440609	no_overlap
chr2R	18440846	18441346	early_iDRRE
chr2R	18503439	18503939	no_overlap
chr2R	18504180	18504680	no_overlap
chr2R	18531215	18531715	no_overlap
chr2R	18585989	18586489	early_iDRRE
chr2R	18611459	18611959	early_iDRRE
chr2R	18638311	18638811	no_overlap
chr2R	18638837	18639337	no_overlap
chr2R	18639611	18640111	no_overlap
chr2R	18652648	18653148	no_overlap
chr2R	18672749	18673249	no_overlap
chr2R	18673261	18673761	no_overlap
chr2R	18688675	18689175	early_iDRRE
chr2R	18776660	18777160	no_overlap
chr2R	18777193	18777693	early_iDRRE
chr2R	18802390	18802890	no_overlap
chr2R	18806183	18806683	no_overlap
chr2R	18834509	18835009	no_overlap
chr2R	18835127	18835627	no_overlap
chr2R	18846262	18846762	early_iDRRE
chr2R	18857535	18858035	no_overlap
chr2R	18877901	18878401	no_overlap
chr2R	18878906	18879406	early_iDRRE
chr2R	18947005	18947505	no_overlap
chr2R	19142343	19142843	no_overlap
chr2R	19142996	19143496	no_overlap
chr2R	19164095	19164595	no_overlap
chr2R	19178515	19179015	no_overlap
chr2R	19179278	19179778	early_iDRRE
chr2R	19229566	19230066	no_overlap
chr2R	19231062	19231562	no_overlap
chr2R	19249531	19250031	no_overlap
chr2R	19268712	19269212	early_iDRRE
chr2R	19269248	19269748	no_overlap
chr2R	19290012	19290512	no_overlap
chr2R	19292022	19292522	no_overlap
chr2R	19292814	19293314	no_overlap
chr2R	19423564	19424064	no_overlap
chr2R	19424253	19424753	no_overlap
chr2R	19424904	19425404	no_overlap
chr2R	19451213	19451713	early_iDRRE
chr2R	19455994	19456494	no_overlap
chr2R	19456862	19457362	no_overlap
chr2R	19462103	19462603	no_overlap
chr2R	19467171	19467671	early_iDRRE
chr2R	19467984	19468484	early_iDRRE
chr2R	19491427	19491927	no_overlap
chr2R	19491973	19492473	no_overlap
chr2R	19578605	19579105	no_overlap
chr2R	19647226	19647726	no_overlap
chr2R	19669018	19669518	no_overlap
chr2R	19669757	19670257	no_overlap
chr2R	19826251	19826751	no_overlap
chr2R	19848196	19848696	no_overlap
chr2R	19870585	19871085	no_overlap
chr2R	20000348	20000848	no_overlap
chr2R	20106338	20106838	no_overlap
chr2R	20111097	20111597	no_overlap
chr2R	20308500	20309000	no_overlap
chr2R	20581809	20582309	no_overlap
chr2R	20587126	20587626	no_overlap
chr2R	20603479	20603979	no_overlap
chr2R	20617744	20618244	no_overlap
chr2R	20618520	20619020	no_overlap
chr2R	20632173	20632673	no_overlap
chr2R	20633081	20633581	no_overlap
chr2R	20646177	20646677	no_overlap
chr2R	20651631	20652131	early_iDRRE
chr2R	20666809	20667309	no_overlap
chr2R	20835745	20836245	no_overlap
chr2R	20884417	20884917	no_overlap
chr2R	20913895	20914395	early_iDRRE
chr2R	20916397	20916897	no_overlap
chr2R	20996529	20997029	early_iDRRE
chr2R	21026273	21026773	early_iDRRE
chr2R	21026897	21027397	no_overlap
chr2R	21036667	21037167	early_iDRRE
chr2R	21047018	21047518	no_overlap
chr2R	21047718	21048218	early_iDRRE
chr2R	21056227	21056727	no_overlap
chr2R	21056823	21057323	no_overlap
chr2R	21057662	21058162	no_overlap
chr2R	21072819	21073319	no_overlap
chr2R	21075263	21075763	early_iDRRE
chr2R	21075786	21076286	early_iDRRE
chr2R	21128146	21128646	no_overlap
chr2R	21134662	21135162	no_overlap
chr2R	21159675	21160175	no_overlap
chr2R	21160255	21160755	no_overlap
chr2R	21161213	21161713	no_overlap
chr2R	21180380	21180880	no_overlap
chr2R	21180983	21181483	no_overlap
chr2R	21249582	21250082	no_overlap
chr2R	21295824	21296324	early_iDRRE
chr2R	21323248	21323748	no_overlap
chr2R	21323923	21324423	no_overlap
chr2R	21362675	21363175	early_iDRRE
chr2R	21364251	21364751	early_iDRRE
chr2R	21374813	21375313	no_overlap
chr2R	21474795	21475295	no_overlap
chr2R	21475463	21475963	no_overlap
chr2R	21480728	21481228	no_overlap
chr2R	21501705	21502205	no_overlap
chr2R	21522228	21522728	no_overlap
chr2R	21523947	21524447	early_iDRRE
chr2R	21546338	21546838	no_overlap
chr2R	21547099	21547599	no_overlap
chr2R	21553586	21554086	no_overlap
chr2R	21571214	21571714	no_overlap
chr2R	21645741	21646241	no_overlap
chr2R	21646440	21646940	no_overlap
chr2R	21669778	21670278	no_overlap
chr2R	21704516	21705016	no_overlap
chr2R	21709182	21709682	no_overlap
chr2R	21713179	21713679	no_overlap
chr2R	21713739	21714239	no_overlap
chr2R	21871684	21872184	no_overlap
chr2R	21898646	21899146	no_overlap
chr2R	21899257	21899757	no_overlap
chr2R	22060760	22061260	early_iDRRE
chr2R	22080035	22080535	no_overlap
chr2R	22121686	22122186	no_overlap
chr2R	22122453	22122953	no_overlap
chr2R	22160214	22160714	no_overlap
chr2R	22179314	22179814	no_overlap
chr2R	22212675	22213175	early_iDRRE
chr2R	22217099	22217599	no_overlap
chr2R	22242794	22243294	early_iDRRE
chr2R	22270491	22270991	no_overlap
chr2R	22271050	22271550	no_overlap
chr2R	22311157	22311657	no_overlap
chr2R	22311673	22312173	no_overlap
chr2R	22317604	22318104	no_overlap
chr2R	22318173	22318673	no_overlap
chr2R	22383008	22383508	no_overlap
chr2R	22399490	22399990	no_overlap
chr2R	22402092	22402592	no_overlap
chr2R	22403390	22403890	no_overlap
chr2R	22415492	22415992	no_overlap
chr2R	22426714	22427214	no_overlap
chr2R	22545886	22546386	no_overlap
chr2R	22546418	22546918	no_overlap
chr2R	22561653	22562153	no_overlap
chr2R	22569176	22569676	no_overlap
chr2R	22592655	22593155	no_overlap
chr2R	22644624	22645124	no_overlap
chr2R	22645938	22646438	no_overlap
chr2R	22676011	22676511	no_overlap
chr2R	22676732	22677232	early_iDRRE
chr2R	22680781	22681281	early_iDRRE
chr2R	22681727	22682227	no_overlap
chr2R	22688691	22689191	no_overlap
chr2R	22728044	22728544	no_overlap
chr2R	22728945	22729445	no_overlap
chr2R	22736415	22736915	no_overlap
chr2R	22736923	22737423	no_overlap
chr2R	22740171	22740671	no_overlap
chr2R	22806450	22806950	no_overlap
chr2R	22853617	22854117	no_overlap
chr2R	22895965	22896465	no_overlap
chr2R	22924625	22925125	no_overlap
chr2R	22934849	22935349	no_overlap
chr2R	23022906	23023406	early_iDRRE
chr2R	23033858	23034358	no_overlap
chr2R	23042867	23043367	no_overlap
chr2R	23066783	23067283	no_overlap
chr2R	23067325	23067825	no_overlap
chr2R	23203724	23204224	no_overlap
chr2R	23240281	23240781	no_overlap
chr2R	23246182	23246682	no_overlap
chr2R	23328008	23328508	no_overlap
chr2R	23383238	23383738	no_overlap
chr2R	23523383	23523883	no_overlap
chr2R	23547283	23547783	no_overlap
chr2R	23547871	23548371	no_overlap
chr2R	23551232	23551732	no_overlap
chr2R	23553904	23554404	no_overlap
chr2R	23554445	23554945	no_overlap
chr2R	23580690	23581190	no_overlap
chr2R	23587309	23587809	no_overlap
chr2R	23587964	23588464	no_overlap
chr2R	23614658	23615158	no_overlap
chr2R	23632177	23632677	no_overlap
chr2R	23637804	23638304	no_overlap
chr2R	23659223	23659723	no_overlap
chr2R	23666885	23667385	no_overlap
chr2R	23667406	23667906	no_overlap
chr2R	23683179	23683679	no_overlap
chr2R	23713301	23713801	no_overlap
chr2R	23746429	23746929	early_iDRRE
chr2R	23752630	23753130	no_overlap
chr2R	23798288	23798788	no_overlap
chr2R	23817872	23818372	no_overlap
chr2R	23839954	23840454	no_overlap
chr2R	23844617	23845117	no_overlap
chr2R	23845155	23845655	no_overlap
chr2R	23864684	23865184	no_overlap
chr2R	23871885	23872385	no_overlap
chr2R	23940224	23940724	no_overlap
chr2R	23978308	23978808	early_iDRRE
chr2R	24028434	24028934	no_overlap
chr2R	24033655	24034155	no_overlap
chr2R	24034191	24034691	no_overlap
chr2R	24046435	24046935	no_overlap
chr2R	24057299	24057799	no_overlap
chr2R	24057928	24058428	no_overlap
chr2R	24063772	24064272	no_overlap
chr2R	24081576	24082076	no_overlap
chr2R	24162904	24163404	early_iDRRE
chr2R	24163498	24163998	no_overlap
chr2R	24186315	24186815	no_overlap
chr2R	24186849	24187349	no_overlap
chr2R	24257849	24258349	no_overlap
chr2R	24258372	24258872	no_overlap
chr2R	24275242	24275742	no_overlap
chr2R	24275758	24276258	no_overlap
chr2R	24306000	24306500	no_overlap
chr2R	24369415	24369915	no_overlap
chr2R	24369942	24370442	no_overlap
chr2R	24514661	24515161	no_overlap
chr2R	24525711	24526211	no_overlap
chr2R	24543457	24543957	no_overlap
chr2R	24544320	24544820	no_overlap
chr2R	24564841	24565341	no_overlap
chr2R	24581054	24581554	no_overlap
chr2R	24582095	24582595	no_overlap
chr2R	24611320	24611820	early_iDRRE
chr2R	24630209	24630709	no_overlap
chr2R	24630849	24631349	no_overlap
chr2R	24685215	24685715	no_overlap
chr2R	24743060	24743560	early_iDRRE
chr2R	24743860	24744360	early_iDRRE
chr2R	24767590	24768090	no_overlap
chr2R	24793132	24793632	no_overlap
chr2R	24793655	24794155	no_overlap
chr2R	24813573	24814073	early_iDRRE
chr2R	24814432	24814932	no_overlap
chr2R	24837287	24837787	early_iDRRE
chr2R	24881795	24882295	early_iDRRE
chr2R	24942514	24943014	no_overlap
chr2R	24955260	24955760	no_overlap
chr2R	24955879	24956379	no_overlap
chr2R	24963243	24963743	no_overlap
chr2R	24964047	24964547	no_overlap
chr2R	24964678	24965178	no_overlap
chr2R	24971742	24972242	no_overlap
chr2R	24983013	24983513	no_overlap
chr2R	25001664	25002164	no_overlap
chr2R	25022809	25023309	no_overlap
chr2R	25031938	25032438	no_overlap
chr2R	25052222	25052722	no_overlap
chr2R	25061650	25062150	no_overlap
chr2R	25062280	25062780	no_overlap
chr2R	25076137	25076637	no_overlap
chr2R	25076793	25077293	no_overlap
chr2R	25115289	25115789	early_iDRRE
chr2R	25206192	25206692	early_iDRRE
chr3L	69229	69729	no_overlap
chr3L	73194	73694	early_iDRRE
chr3L	73730	74230	early_iDRRE
chr3L	140776	141276	no_overlap
chr3L	160604	161104	no_overlap
chr3L	177638	178138	early_iDRRE
chr3L	178360	178860	no_overlap
chr3L	184254	184754	no_overlap
chr3L	199287	199787	no_overlap
chr3L	211237	211737	no_overlap
chr3L	212674	213174	no_overlap
chr3L	223681	224181	early_iDRRE
chr3L	224338	224838	early_iDRRE
chr3L	224889	225389	no_overlap
chr3L	246538	247038	early_iDRRE
chr3L	262830	263330	early_iDRRE
chr3L	270797	271297	early_iDRRE
chr3L	271484	271984	early_iDRRE
chr3L	297008	297508	early_iDRRE
chr3L	319151	319651	no_overlap
chr3L	331924	332424	no_overlap
chr3L	342555	343055	no_overlap
chr3L	343114	343614	no_overlap
chr3L	346602	347102	no_overlap
chr3L	347377	347877	no_overlap
chr3L	392534	393034	no_overlap
chr3L	432588	433088	no_overlap
chr3L	440792	441292	no_overlap
chr3L	441312	441812	no_overlap
chr3L	441829	442329	no_overlap
chr3L	488026	488526	no_overlap
chr3L	489598	490098	no_overlap
chr3L	490374	490874	no_overlap
chr3L	505801	506301	no_overlap
chr3L	540835	541335	no_overlap
chr3L	543136	543636	early_iDRRE
chr3L	618307	618807	early_iDRRE
chr3L	618863	619363	early_iDRRE
chr3L	620912	621412	early_iDRRE
chr3L	639260	639760	no_overlap
chr3L	639868	640368	early_iDRRE
chr3L	640561	641061	early_iDRRE
chr3L	673264	673764	early_iDRRE
chr3L	682171	682671	no_overlap
chr3L	707841	708341	no_overlap
chr3L	708382	708882	no_overlap
chr3L	732306	732806	early_iDRRE
chr3L	748749	749249	early_iDRRE
chr3L	749342	749842	no_overlap
chr3L	759824	760324	no_overlap
chr3L	760350	760850	no_overlap
chr3L	769192	769692	no_overlap
chr3L	839585	840085	no_overlap
chr3L	871753	872253	no_overlap
chr3L	872309	872809	no_overlap
chr3L	895321	895821	no_overlap
chr3L	1007819	1008319	EL3DR
chr3L	1032500	1033000	no_overlap
chr3L	1098492	1098992	no_overlap
chr3L	1177521	1178021	early_iDRRE
chr3L	1178058	1178558	early_iDRRE
chr3L	1208088	1208588	no_overlap
chr3L	1255704	1256204	no_overlap
chr3L	1256242	1256742	no_overlap
chr3L	1256771	1257271	no_overlap
chr3L	1265315	1265815	no_overlap
chr3L	1313065	1313565	no_overlap
chr3L	1313589	1314089	no_overlap
chr3L	1319231	1319731	early_iDRRE
chr3L	1321203	1321703	no_overlap
chr3L	1334406	1334906	early_iDRRE
chr3L	1335049	1335549	no_overlap
chr3L	1342051	1342551	no_overlap
chr3L	1349088	1349588	no_overlap
chr3L	1364321	1364821	no_overlap
chr3L	1366838	1367338	early_iDRRE
chr3L	1379812	1380312	no_overlap
chr3L	1401350	1401850	no_overlap
chr3L	1463386	1463886	no_overlap
chr3L	1488533	1489033	no_overlap
chr3L	1496016	1496516	no_overlap
chr3L	1496615	1497115	no_overlap
chr3L	1501987	1502487	no_overlap
chr3L	1516569	1517069	no_overlap
chr3L	1517172	1517672	no_overlap
chr3L	1517733	1518233	early_iDRRE
chr3L	1545856	1546356	no_overlap
chr3L	1546492	1546992	no_overlap
chr3L	1568112	1568612	no_overlap
chr3L	1568868	1569368	no_overlap
chr3L	1569604	1570104	early_iDRRE
chr3L	1576628	1577128	no_overlap
chr3L	1577145	1577645	early_iDRRE
chr3L	1586327	1586827	no_overlap
chr3L	1618028	1618528	no_overlap
chr3L	1652066	1652566	no_overlap
chr3L	1652596	1653096	no_overlap
chr3L	1730542	1731042	early_iDRRE
chr3L	1746472	1746972	no_overlap
chr3L	1747114	1747614	no_overlap
chr3L	1754509	1755009	no_overlap
chr3L	1755341	1755841	no_overlap
chr3L	1755896	1756396	no_overlap
chr3L	1794139	1794639	early_iDRRE
chr3L	1794825	1795325	early_iDRRE
chr3L	1795426	1795926	no_overlap
chr3L	1802719	1803219	no_overlap
chr3L	1861425	1861925	no_overlap
chr3L	1861926	1862426	no_overlap
chr3L	1947035	1947535	no_overlap
chr3L	1947625	1948125	no_overlap
chr3L	1969628	1970128	no_overlap
chr3L	2151557	2152057	no_overlap
chr3L	2163724	2164224	no_overlap
chr3L	2170818	2171318	no_overlap
chr3L	2243919	2244419	early_iDRRE
chr3L	2373358	2373858	no_overlap
chr3L	2387669	2388169	no_overlap
chr3L	2411812	2412312	no_overlap
chr3L	2438842	2439342	no_overlap
chr3L	2466569	2467069	no_overlap
chr3L	2467233	2467733	early_iDRRE
chr3L	2487962	2488462	no_overlap
chr3L	2488502	2489002	no_overlap
chr3L	2553103	2553603	no_overlap
chr3L	2586099	2586599	no_overlap
chr3L	2599138	2599638	early_iDRRE
chr3L	2635713	2636213	early_iDRRE
chr3L	2765801	2766301	no_overlap
chr3L	2834485	2834985	early_iDRRE
chr3L	2867431	2867931	no_overlap
chr3L	3035085	3035585	early_iDRRE_and_EL3DR
chr3L	3044852	3045352	no_overlap
chr3L	3045565	3046065	no_overlap
chr3L	3046414	3046914	no_overlap
chr3L	3059917	3060417	no_overlap
chr3L	3070690	3071190	no_overlap
chr3L	3096277	3096777	no_overlap
chr3L	3121767	3122267	no_overlap
chr3L	3125227	3125727	no_overlap
chr3L	3127322	3127822	no_overlap
chr3L	3148238	3148738	no_overlap
chr3L	3148768	3149268	no_overlap
chr3L	3165059	3165559	no_overlap
chr3L	3165654	3166154	no_overlap
chr3L	3225758	3226258	no_overlap
chr3L	3239902	3240402	no_overlap
chr3L	3242112	3242612	no_overlap
chr3L	3249117	3249617	no_overlap
chr3L	3252068	3252568	early_iDRRE
chr3L	3257645	3258145	no_overlap
chr3L	3279920	3280420	no_overlap
chr3L	3325520	3326020	no_overlap
chr3L	3326054	3326554	no_overlap
chr3L	3326670	3327170	no_overlap
chr3L	3336607	3337107	no_overlap
chr3L	3337135	3337635	early_iDRRE
chr3L	3384003	3384503	no_overlap
chr3L	3389054	3389554	no_overlap
chr3L	3418160	3418660	early_iDRRE
chr3L	3515607	3516107	no_overlap
chr3L	3541905	3542405	early_iDRRE
chr3L	3542448	3542948	early_iDRRE
chr3L	3543462	3543962	no_overlap
chr3L	3611994	3612494	no_overlap
chr3L	3625992	3626492	no_overlap
chr3L	3818540	3819040	no_overlap
chr3L	3845779	3846279	no_overlap
chr3L	4040008	4040508	no_overlap
chr3L	4040514	4041014	no_overlap
chr3L	4071454	4071954	no_overlap
chr3L	4102582	4103082	early_iDRRE
chr3L	4108071	4108571	early_iDRRE
chr3L	4108593	4109093	no_overlap
chr3L	4120405	4120905	no_overlap
chr3L	4122102	4122602	no_overlap
chr3L	4133976	4134476	no_overlap
chr3L	4138869	4139369	no_overlap
chr3L	4148473	4148973	no_overlap
chr3L	4160814	4161314	no_overlap
chr3L	4167138	4167638	no_overlap
chr3L	4226992	4227492	no_overlap
chr3L	4239284	4239784	early_iDRRE
chr3L	4240078	4240578	no_overlap
chr3L	4253011	4253511	no_overlap
chr3L	4292088	4292588	no_overlap
chr3L	4359712	4360212	no_overlap
chr3L	4360231	4360731	early_iDRRE
chr3L	4407797	4408297	no_overlap
chr3L	4408302	4408802	no_overlap
chr3L	4531894	4532394	no_overlap
chr3L	4541809	4542309	no_overlap
chr3L	4542997	4543497	no_overlap
chr3L	4625765	4626265	no_overlap
chr3L	4692486	4692986	no_overlap
chr3L	4719776	4720276	no_overlap
chr3L	4824482	4824982	early_iDRRE
chr3L	4839809	4840309	no_overlap
chr3L	4840358	4840858	no_overlap
chr3L	5184706	5185206	no_overlap
chr3L	5276873	5277373	no_overlap
chr3L	5277449	5277949	no_overlap
chr3L	5355190	5355690	no_overlap
chr3L	5356339	5356839	no_overlap
chr3L	5365639	5366139	no_overlap
chr3L	5366420	5366920	no_overlap
chr3L	5550976	5551476	no_overlap
chr3L	5570970	5571470	no_overlap
chr3L	5577164	5577664	no_overlap
chr3L	5577863	5578363	early_iDRRE
chr3L	5634034	5634534	no_overlap
chr3L	5751792	5752292	no_overlap
chr3L	5752756	5753256	no_overlap
chr3L	5765195	5765695	no_overlap
chr3L	5802020	5802520	no_overlap
chr3L	5845378	5845878	no_overlap
chr3L	5902182	5902682	no_overlap
chr3L	5926530	5927030	no_overlap
chr3L	5932147	5932647	no_overlap
chr3L	6065859	6066359	no_overlap
chr3L	6143384	6143884	no_overlap
chr3L	6154906	6155406	no_overlap
chr3L	6192756	6193256	no_overlap
chr3L	6193343	6193843	no_overlap
chr3L	6218497	6218997	early_iDRRE
chr3L	6256654	6257154	early_iDRRE
chr3L	6262287	6262787	no_overlap
chr3L	6262863	6263363	no_overlap
chr3L	6263676	6264176	no_overlap
chr3L	6352126	6352626	no_overlap
chr3L	6400271	6400771	no_overlap
chr3L	6495475	6495975	no_overlap
chr3L	6495977	6496477	no_overlap
chr3L	6699558	6700058	no_overlap
chr3L	6700458	6700958	no_overlap
chr3L	6719368	6719868	no_overlap
chr3L	6743693	6744193	early_iDRRE
chr3L	6752287	6752787	early_iDRRE
chr3L	6756189	6756689	no_overlap
chr3L	6770700	6771200	no_overlap
chr3L	6809757	6810257	no_overlap
chr3L	6904017	6904517	early_iDRRE
chr3L	6964439	6964939	no_overlap
chr3L	6965030	6965530	no_overlap
chr3L	6979215	6979715	no_overlap
chr3L	6979859	6980359	no_overlap
chr3L	7094612	7095112	no_overlap
chr3L	7133893	7134393	early_iDRRE
chr3L	7134709	7135209	no_overlap
chr3L	7156995	7157495	no_overlap
chr3L	7262840	7263340	no_overlap
chr3L	7263594	7264094	no_overlap
chr3L	7328684	7329184	no_overlap
chr3L	7338640	7339140	no_overlap
chr3L	7339405	7339905	no_overlap
chr3L	7344881	7345381	no_overlap
chr3L	7360423	7360923	no_overlap
chr3L	7360940	7361440	no_overlap
chr3L	7370345	7370845	early_iDRRE
chr3L	7381371	7381871	no_overlap
chr3L	7433624	7434124	no_overlap
chr3L	7434268	7434768	no_overlap
chr3L	7435000	7435500	no_overlap
chr3L	7529097	7529597	early_iDRRE
chr3L	7614166	7614666	no_overlap
chr3L	7653765	7654265	no_overlap
chr3L	7654393	7654893	no_overlap
chr3L	7726459	7726959	early_iDRRE
chr3L	7742009	7742509	no_overlap
chr3L	7804689	7805189	no_overlap
chr3L	7805260	7805760	early_iDRRE
chr3L	7809475	7809975	no_overlap
chr3L	7818705	7819205	early_iDRRE
chr3L	7828021	7828521	no_overlap
chr3L	7854675	7855175	no_overlap
chr3L	7855200	7855700	no_overlap
chr3L	7911607	7912107	no_overlap
chr3L	7978295	7978795	no_overlap
chr3L	8013027	8013527	no_overlap
chr3L	8013629	8014129	no_overlap
chr3L	8115480	8115980	no_overlap
chr3L	8116212	8116712	no_overlap
chr3L	8127746	8128246	early_iDRRE
chr3L	8151716	8152216	no_overlap
chr3L	8158225	8158725	no_overlap
chr3L	8158813	8159313	no_overlap
chr3L	8186535	8187035	early_iDRRE
chr3L	8308861	8309361	early_iDRRE
chr3L	8360592	8361092	no_overlap
chr3L	8372037	8372537	no_overlap
chr3L	8380418	8380918	no_overlap
chr3L	8441990	8442490	no_overlap
chr3L	8449838	8450338	early_iDRRE
chr3L	8506623	8507123	early_iDRRE
chr3L	8519015	8519515	no_overlap
chr3L	8534869	8535369	no_overlap
chr3L	8643332	8643832	early_iDRRE
chr3L	8643881	8644381	early_iDRRE
chr3L	8676085	8676585	no_overlap
chr3L	8765405	8765905	early_iDRRE
chr3L	8766212	8766712	no_overlap
chr3L	8766859	8767359	no_overlap
chr3L	8824872	8825372	early_iDRRE
chr3L	8825502	8826002	no_overlap
chr3L	8833276	8833776	early_iDRRE
chr3L	8839966	8840466	no_overlap
chr3L	8912307	8912807	no_overlap
chr3L	8954111	8954611	no_overlap
chr3L	8954843	8955343	no_overlap
chr3L	8974620	8975120	no_overlap
chr3L	8996994	8997494	no_overlap
chr3L	9004782	9005282	no_overlap
chr3L	9005326	9005826	no_overlap
chr3L	9019054	9019554	no_overlap
chr3L	9034751	9035251	no_overlap
chr3L	9041030	9041530	no_overlap
chr3L	9056464	9056964	early_iDRRE
chr3L	9057621	9058121	early_iDRRE
chr3L	9134377	9134877	no_overlap
chr3L	9134891	9135391	no_overlap
chr3L	9372534	9373034	no_overlap
chr3L	9373562	9374062	early_iDRRE
chr3L	9377331	9377831	no_overlap
chr3L	9383410	9383910	early_iDRRE
chr3L	9384030	9384530	early_iDRRE
chr3L	9401597	9402097	no_overlap
chr3L	9402429	9402929	no_overlap
chr3L	9410433	9410933	no_overlap
chr3L	9411037	9411537	no_overlap
chr3L	9426396	9426896	no_overlap
chr3L	9429841	9430341	no_overlap
chr3L	9446668	9447168	no_overlap
chr3L	9447208	9447708	early_iDRRE
chr3L	9456056	9456556	no_overlap
chr3L	9461963	9462463	no_overlap
chr3L	9462507	9463007	early_iDRRE
chr3L	9509230	9509730	no_overlap
chr3L	9546833	9547333	no_overlap
chr3L	9548786	9549286	no_overlap
chr3L	9614675	9615175	no_overlap
chr3L	9678147	9678647	no_overlap
chr3L	9696720	9697220	no_overlap
chr3L	9713460	9713960	no_overlap
chr3L	9714392	9714892	no_overlap
chr3L	9744059	9744559	early_iDRRE
chr3L	9744739	9745239	early_iDRRE
chr3L	9763396	9763896	no_overlap
chr3L	9853846	9854346	no_overlap
chr3L	9854635	9855135	no_overlap
chr3L	9968828	9969328	no_overlap
chr3L	10236287	10236787	no_overlap
chr3L	10515772	10516272	no_overlap
chr3L	10516279	10516779	no_overlap
chr3L	10533685	10534185	no_overlap
chr3L	10666447	10666947	early_iDRRE
chr3L	10697463	10697963	early_iDRRE
chr3L	10711774	10712274	early_iDRRE
chr3L	10715702	10716202	no_overlap
chr3L	10737346	10737846	early_iDRRE
chr3L	10739252	10739752	early_iDRRE
chr3L	10740138	10740638	early_iDRRE
chr3L	10760652	10761152	no_overlap
chr3L	10776045	10776545	early_iDRRE
chr3L	10856548	10857048	early_iDRRE
chr3L	10898708	10899208	early_iDRRE
chr3L	11001515	11002015	EL3DR
chr3L	11008917	11009417	no_overlap
chr3L	11070357	11070857	no_overlap
chr3L	11119564	11120064	no_overlap
chr3L	11120256	11120756	no_overlap
chr3L	11205698	11206198	no_overlap
chr3L	11223953	11224453	no_overlap
chr3L	11246115	11246615	no_overlap
chr3L	11247492	11247992	no_overlap
chr3L	11263636	11264136	no_overlap
chr3L	11292110	11292610	early_iDRRE
chr3L	11324380	11324880	early_iDRRE
chr3L	11342490	11342990	no_overlap
chr3L	11343521	11344021	no_overlap
chr3L	11380045	11380545	no_overlap
chr3L	11442296	11442796	no_overlap
chr3L	11487332	11487832	no_overlap
chr3L	11537059	11537559	early_iDRRE
chr3L	11552361	11552861	no_overlap
chr3L	11552878	11553378	no_overlap
chr3L	11561922	11562422	no_overlap
chr3L	11586812	11587312	no_overlap
chr3L	11587326	11587826	no_overlap
chr3L	11587890	11588390	no_overlap
chr3L	11623338	11623838	no_overlap
chr3L	11683983	11684483	no_overlap
chr3L	11684598	11685098	no_overlap
chr3L	11696392	11696892	no_overlap
chr3L	11708200	11708700	early_iDRRE
chr3L	11819576	11820076	no_overlap
chr3L	11832386	11832886	early_iDRRE
chr3L	11832955	11833455	early_iDRRE
chr3L	12014054	12014554	no_overlap
chr3L	12056258	12056758	no_overlap
chr3L	12081539	12082039	no_overlap
chr3L	12096439	12096939	early_iDRRE
chr3L	12111088	12111588	early_iDRRE
chr3L	12124207	12124707	early_iDRRE
chr3L	12138424	12138924	early_iDRRE
chr3L	12139105	12139605	no_overlap
chr3L	12265602	12266102	no_overlap
chr3L	12391235	12391735	no_overlap
chr3L	12407403	12407903	no_overlap
chr3L	12467332	12467832	no_overlap
chr3L	12467894	12468394	no_overlap
chr3L	12496956	12497456	no_overlap
chr3L	12514717	12515217	no_overlap
chr3L	12529547	12530047	no_overlap
chr3L	12572184	12572684	no_overlap
chr3L	12580512	12581012	no_overlap
chr3L	12609379	12609879	no_overlap
chr3L	12615983	12616483	early_iDRRE
chr3L	12627626	12628126	no_overlap
chr3L	12690442	12690942	early_iDRRE
chr3L	12735208	12735708	no_overlap
chr3L	12792941	12793441	early_iDRRE
chr3L	12804232	12804732	early_iDRRE
chr3L	12804744	12805244	no_overlap
chr3L	12814967	12815467	no_overlap
chr3L	12850054	12850554	no_overlap
chr3L	13028749	13029249	no_overlap
chr3L	13113810	13114310	no_overlap
chr3L	13172454	13172954	no_overlap
chr3L	13183345	13183845	no_overlap
chr3L	13228463	13228963	no_overlap
chr3L	13400970	13401470	no_overlap
chr3L	13476400	13476900	no_overlap
chr3L	13477163	13477663	no_overlap
chr3L	13493897	13494397	early_iDRRE
chr3L	13499195	13499695	no_overlap
chr3L	13499731	13500231	no_overlap
chr3L	13763900	13764400	no_overlap
chr3L	13925163	13925663	no_overlap
chr3L	13939022	13939522	no_overlap
chr3L	13946013	13946513	early_iDRRE
chr3L	13964698	13965198	no_overlap
chr3L	14002642	14003142	early_iDRRE
chr3L	14037544	14038044	no_overlap
chr3L	14038158	14038658	no_overlap
chr3L	14131351	14131851	no_overlap
chr3L	14177105	14177605	early_iDRRE
chr3L	14177657	14178157	early_iDRRE
chr3L	14189922	14190422	no_overlap
chr3L	14190478	14190978	no_overlap
chr3L	14191008	14191508	early_iDRRE
chr3L	14200942	14201442	no_overlap
chr3L	14202232	14202732	no_overlap
chr3L	14274042	14274542	no_overlap
chr3L	14409487	14409987	no_overlap
chr3L	14410342	14410842	early_iDRRE
chr3L	14427136	14427636	no_overlap
chr3L	14476238	14476738	no_overlap
chr3L	14476785	14477285	no_overlap
chr3L	14537358	14537858	no_overlap
chr3L	14550936	14551436	no_overlap
chr3L	14633801	14634301	no_overlap
chr3L	14634667	14635167	early_iDRRE
chr3L	14637845	14638345	early_iDRRE
chr3L	14673942	14674442	no_overlap
chr3L	14706534	14707034	no_overlap
chr3L	14743261	14743761	early_iDRRE
chr3L	14755104	14755604	early_iDRRE
chr3L	14756429	14756929	no_overlap
chr3L	14757126	14757626	no_overlap
chr3L	14786224	14786724	no_overlap
chr3L	14789485	14789985	no_overlap
chr3L	14790140	14790640	no_overlap
chr3L	14804675	14805175	no_overlap
chr3L	14969111	14969611	no_overlap
chr3L	14987056	14987556	no_overlap
chr3L	14999042	14999542	no_overlap
chr3L	14999566	15000066	no_overlap
chr3L	15071985	15072485	no_overlap
chr3L	15094367	15094867	no_overlap
chr3L	15094941	15095441	no_overlap
chr3L	15104473	15104973	early_iDRRE
chr3L	15107353	15107853	early_iDRRE
chr3L	15141192	15141692	early_iDRRE
chr3L	15141707	15142207	early_iDRRE
chr3L	15142270	15142770	early_iDRRE
chr3L	15212672	15213172	early_iDRRE
chr3L	15220729	15221229	early_iDRRE
chr3L	15221262	15221762	early_iDRRE
chr3L	15234178	15234678	early_iDRRE
chr3L	15500770	15501270	no_overlap
chr3L	15533732	15534232	early_iDRRE
chr3L	15534449	15534949	early_iDRRE
chr3L	15553983	15554483	no_overlap
chr3L	15554536	15555036	no_overlap
chr3L	15565819	15566319	early_iDRRE
chr3L	15566408	15566908	no_overlap
chr3L	15588657	15589157	early_iDRRE
chr3L	15699835	15700335	no_overlap
chr3L	15728104	15728604	no_overlap
chr3L	15729175	15729675	early_iDRRE
chr3L	15826774	15827274	no_overlap
chr3L	15967730	15968230	no_overlap
chr3L	15968258	15968758	no_overlap
chr3L	15982735	15983235	no_overlap
chr3L	15988115	15988615	no_overlap
chr3L	16011407	16011907	no_overlap
chr3L	16028922	16029422	no_overlap
chr3L	16042744	16043244	no_overlap
chr3L	16043294	16043794	early_iDRRE
chr3L	16043866	16044366	early_iDRRE
chr3L	16051509	16052009	no_overlap
chr3L	16052853	16053353	early_iDRRE
chr3L	16090132	16090632	no_overlap
chr3L	16158267	16158767	early_iDRRE
chr3L	16164274	16164774	early_iDRRE
chr3L	16178381	16178881	early_iDRRE
chr3L	16231173	16231673	no_overlap
chr3L	16231698	16232198	no_overlap
chr3L	16410272	16410772	early_iDRRE
chr3L	16419219	16419719	no_overlap
chr3L	16483364	16483864	early_iDRRE
[truncated: 1,980 more rows]
