# Supplementary material for: Shared enhancer gene regulatory networks between wound and oncogenic programs
Source: eLife. 2023 May 3;12:e81173. doi: 10.7554/eLife.81173 (PMC10238094; doi:10.7554/eLife.81173)
Supplement: Supplementary file 5. [file elife-81173-supp5.csv]

	group	names	scores	logfoldchanges	pvals	pvals_adj
0	ras_1	GstD9	22.98555	1.6891317	4.4056379750945854e-104	4.042172842149282e-100
1	ras_1	CG15784	20.504911	2.078524	3.8740457811414535e-85	1.3809987027707178e-81
2	ras_1	CHKov1	20.49565	1.8612423	4.5155270935282325e-85	1.3809987027707178e-81
3	ras_1	ref(2)P	20.295795	1.5264003	1.3571232687543542e-83	3.1129014977053e-80
4	ras_1	CG18547	19.999838	1.8935745	2.2666122191125926e-81	4.1592334220716072e-78
9	ras_1	CG3397	18.963396	2.6900785	2.1135715278409335e-72	1.762910797085506e-69
10	ras_1	y	18.95453	2.1965823	1.508219215639694e-73	1.3837911303494192e-70
12	ras_1	Hsp26	18.555977	1.6367284	5.643965580022631e-71	4.315282016392303e-68
15	ras_1	lawc	18.037727	1.5469626	1.406685805208347e-67	8.066463914241616e-65
16	ras_1	CG1299	17.71748	1.7849662	2.5076884355112377e-65	1.2782245219897559e-62
17	ras_1	Hsp70Bc	17.708296	1.7895414	2.111576176835277e-65	1.1396300836743333e-62
22	ras_1	bnl	17.006245	1.8466747	1.305618925089253e-60	5.208284190301694e-58
25	ras_1	CG2909	16.841486	1.8054179	1.643724051077716e-59	5.953880163889327e-57
26	ras_1	Arc2	16.820435	1.6834594	1.7403357011932464e-59	5.953880163889327e-57
31	ras_1	CG13117	16.333504	1.9063871	3.8404910074126676e-56	1.0363677939120949e-53
32	ras_1	frm	16.301548	1.5958884	3.5489222415827145e-56	9.867079262582243e-54
36	ras_1	CG2065	15.946317	2.002233	1.772864347391158e-53	4.28053431245102e-51
37	ras_1	ich	15.897031	2.688782	5.872383916090757e-53	1.3815159597469922e-50
39	ras_1	Ero1L	15.738753	1.7958448	2.9978012383767637e-52	6.396471247001583e-50
40	ras_1	Hsp68	15.736347	1.6687983	9.554267943461483e-53	2.1380587410063196e-50
55	ras_1	rho	15.085607	1.6214767	1.0764002589556826e-48	1.7027538579169635e-46
56	ras_1	upd2	15.046648	1.6204395	1.7014416478407557e-48	2.645885952362531e-46
58	ras_1	CG15282	14.809013	1.9403746	7.307144445789335e-47	1.064175401430431e-44
64	ras_1	CG3348	14.595897	1.5251725	5.548940416959689e-46	7.598735570985842e-44
65	ras_1	CG3448	14.584753	1.5860424	7.426696685461977e-46	1.00205797189873e-43
69	ras_1	CG13024	14.425669	1.845013	1.4582779740137164e-44	1.8080676231859255e-42
72	ras_1	Hers	14.38038	1.8473209	2.1788418894155247e-44	2.665449911384992e-42
73	ras_1	upd3	14.317466	1.7526917	3.057805387692929e-44	3.6435538223483924e-42
77	ras_1	GstD10	14.077126	1.5598546	6.5896928458460754e-43	7.464250846992314e-41
78	ras_1	CG32549	14.074241	2.272126	1.1976944308551694e-42	1.3239573979633952e-40
79	ras_1	Hsp23	14.025095	1.666467	1.0389003051537721e-42	1.162428085339739e-40
80	ras_1	glob1	14.009405	2.3806365	4.190876839615263e-42	4.523681765114123e-40
82	ras_1	Arc1	13.769948	1.8106774	2.9726425468946716e-41	3.17139481020449e-39
86	ras_1	CG14401	13.579833	2.6212902	1.4238351996441665e-39	1.3751250480773924e-37
101	ras_1	Cyp6a20	13.129913	2.001707	1.334067137734259e-37	1.1439314008141892e-35
102	ras_1	Lim1	13.055557	2.3039703	4.937534611922429e-37	4.1561357857236956e-35
104	ras_1	CG31279	12.992114	2.5609937	1.039788464863832e-36	8.442530234624476e-35
107	ras_1	Ugt37D1	12.928042	2.1059835	1.66135976251733e-36	1.3371031422014477e-34
115	ras_1	CG12224	12.680901	2.14734	3.4283497186975797e-35	2.536702312020185e-33
116	ras_1	CHKov2	12.657443	1.5744042	2.4225693226903026e-35	1.807079149242563e-33
129	ras_1	CG13659	12.297102	1.834982	2.2603880086350027e-33	1.5137999984836605e-31
131	ras_1	CG13116	12.219002	2.7958338	9.197087109724689e-33	5.942484100825635e-31
132	ras_1	CG31469	12.20977	2.3755872	7.788757859125832e-33	5.068216550175852e-31
134	ras_1	reb	12.084724	1.9731807	3.2083754454974936e-32	2.0442253272527435e-30
137	ras_1	CG13226	12.003844	2.4666386	1.1815667159692669e-31	7.227249746012016e-30
139	ras_1	CG9521	11.957308	3.7017906	2.6617376222664926e-31	1.5755769473738754e-29
140	ras_1	DOR	11.951757	1.8583736	9.66892375842825e-32	5.9940794245661624e-30
145	ras_1	GstE9	11.886872	1.9113919	2.6525000618442598e-31	1.5755769473738754e-29
155	ras_1	Ugt37C2	11.622622	2.0127141	4.467645757979083e-30	2.4545299299076696e-28
164	ras_1	Mocs1	11.36589	1.6242095	5.049223375146585e-29	2.6624496820097656e-27
168	ras_1	CG1124	11.221779	1.9469869	3.038151478701258e-28	1.5400574484576819e-26
171	ras_1	CG9747	11.206532	1.5334579	3.362552967419315e-28	1.6858701353044927e-26
180	ras_1	Hph	11.085708	1.5212712	1.4043150803270467e-27	6.675953814508111e-26
185	ras_1	CG32241	10.978884	1.6569916	3.262754976042166e-27	1.5119079245043874e-25
202	ras_1	fok	10.735324	1.7868177	5.31541382767835e-26	2.2474157543294405e-24
204	ras_1	AOX1	10.674975	2.0217505	7.87111797523893e-26	3.282613973764417e-24
207	ras_1	Nox	10.638134	1.741867	1.2224925706901317e-25	5.02976203411747e-24
221	ras_1	Tsp42Ed	10.367518	1.7380615	1.6570181719526945e-24	6.387874675489904e-23
225	ras_1	CG33926	10.331016	2.415605	4.3287974255586666e-24	1.5950488505823602e-22
228	ras_1	GstD5	10.3022175	2.9603324	5.1531132616355436e-24	1.8761831022026236e-22
245	ras_1	CG7365	10.136989	2.974303	2.761584686437956e-23	9.419159664709386e-22
260	ras_1	disco	9.861635	1.9827112	2.444485568821458e-22	8.010055390691742e-21
284	ras_1	ct	9.583496	1.5775343	3.1034983824776158e-21	9.185354083623267e-20
290	ras_1	CG12699	9.529327	2.673578	6.372363905527291e-21	1.8213843873275043e-19
318	ras_1	CG7724	9.1845665	1.5114447	1.123134599020066e-19	2.9358290444470387e-18
325	ras_1	CG5973	9.010605	1.5854542	4.941726672366048e-19	1.2594539505266248e-17
353	ras_1	CG14960	8.677793	3.8963237	1.423064008584365e-17	3.288819213793841e-16
363	ras_1	CG9518	8.466818	3.7804306	7.026954308576655e-17	1.5610727792055885e-15
387	ras_1	CG31288	8.233235	1.6041579	3.4211135635379965e-16	7.199247005839705e-15
389	ras_1	Cyp6d2	8.227011	1.5247887	3.6457841380688983e-16	7.637002161365786e-15
396	ras_1	disco-r	8.179416	2.1498775	5.729149173825372e-16	1.1755866824410551e-14
414	ras_1	CG11438	8.054198	1.5602587	1.4144511542665533e-15	2.7968942543956094e-14
421	ras_1	dyl	7.9689274	2.2301621	3.0793495848641024e-15	5.935511017043727e-14
426	ras_1	CG12520	7.923865	1.7124727	4.260296110665207e-15	8.126448402360349e-14
438	ras_1	CG34115	7.78526	3.0489125	1.3949647883419955e-14	2.5648901669414446e-13
451	ras_1	CG42364	7.6793485	2.1240177	2.7742420841811862e-14	4.9424604121092e-13
456	ras_1	CG34265	7.6627417	2.939314	3.687934358334495e-14	6.469751001475907e-13
457	ras_1	obe	7.657026	1.5513579	3.165003826333689e-14	5.60596720204857e-13
460	ras_1	CG8620	7.638969	2.068898	3.7844160218715026e-14	6.626339122265465e-13
469	ras_1	MTF-1	7.5707955	1.7178427	6.467271998027434e-14	1.1049761747095292e-12
483	ras_1	Ance-3	7.4925904	1.8538376	1.0366465936339957e-13	1.7356263679912244e-12
486	ras_1	CG6142	7.457337	1.9208982	1.425770906290502e-13	2.3655421456085632e-12
489	ras_1	GLS	7.4422064	1.5206219	1.5701339624491652e-13	2.57709822995905e-12
498	ras_1	CG12177	7.39691	1.76625	2.2376746777823794e-13	3.595563076821949e-12
530	ras_1	Oatp30B	7.045647	2.0368283	2.7644697622646777e-12	4.0975783632921516e-11
538	ras_1	CBP	7.030851	1.6913174	3.109651737304031e-12	4.586986284528052e-11
540	ras_1	spz	7.0150456	2.5364866	3.461024612058012e-12	5.072667861922087e-11
542	ras_1	CG1941	7.011387	2.310172	3.5086155265819537e-12	5.134218095117931e-11
544	ras_1	CG11658	6.996368	1.9618145	3.798199825041035e-12	5.549121559673805e-11
565	ras_1	CG7768	6.919755	1.6730896	6.394630168771097e-12	8.930096164151418e-11
576	ras_1	CG16820	6.8819995	1.8117217	8.273877894952657e-12	1.1398322775704298e-10
579	ras_1	jdp	6.8692102	1.6403265	8.904285749403215e-12	1.2193555485190225e-10
582	ras_1	CG15097	6.8502483	1.8077279	9.924467597374245e-12	1.3530013403552555e-10
592	ras_1	CG34165	6.7572556	1.6547844	1.8711935934158416e-11	2.499010366752598e-10
596	ras_1	CG4239	6.747964	1.5228589	2.077707047497373e-11	2.752485810524892e-10
600	ras_1	CG6836	6.7247386	1.5299119	2.320903365994372e-11	3.046393187839537e-10
619	ras_1	GstD6	6.621821	2.3801167	4.91761605660478e-11	6.206207334160778e-10
630	ras_1	CG4461	6.573924	2.0289528	6.859580196207736e-11	8.528001124689157e-10
642	ras_1	fog	6.484314	1.8186473	1.1741295582285003e-10	1.4363518262328654e-09
646	ras_1	per	6.4722095	3.4678197	1.3890483837966052e-10	1.6769103843860332e-09
647	ras_1	CG42526	6.4672704	2.4702547	1.3203225569994656e-10	1.602375590009272e-09
667	ras_1	MtnA	6.3942347	1.7989727	2.1655580543812156e-10	2.5343106057331192e-09
693	ras_1	CG33494	6.2687244	1.8512983	4.6349674189131477e-10	5.179759569857263e-09
696	ras_1	c(2)M	6.2608085	1.5182441	4.803513897105161e-10	5.357615511863795e-09
711	ras_1	CG1537	6.191705	1.9803703	7.622239925728165e-10	8.286025037743592e-09
776	ras_1	TfAP-2	5.91593	4.4748588	4.451507197863998e-09	4.3964024263080926e-08
834	ras_1	CG15544	5.6714854	1.7960824	1.651305994169863e-08	1.5150732496508493e-07
838	ras_1	Su(z)2	5.6569514	1.6865045	1.8090831552990448e-08	1.6548691874245998e-07
850	ras_1	CG33468	5.620558	2.7542748	2.3462833543294297e-08	2.1105048799973056e-07
855	ras_1	CG10311	5.6056867	1.9550554	2.462880323656678e-08	2.208888266818184e-07
877	ras_1	ImpE1	5.517371	1.7904452	4.009469255226701e-08	3.500178916908181e-07
879	ras_1	CG30016	5.5133433	1.6367759	4.062765883423996e-08	3.543334313727677e-07
891	ras_1	dpr6	5.48044	2.1337924	4.857165307778795e-08	4.1649057662495744e-07
939	ras_1	Prestin	5.3071594	1.716975	1.27572872703343e-07	1.038581283986843e-06
946	ras_1	CG14810	5.27613	2.4268339	1.539858598444715e-07	1.2425859842330924e-06
948	ras_1	CG10211	5.272328	2.0069425	1.5580237099522718e-07	1.2561395025318184e-06
955	ras_1	Epac	5.243677	2.8728776	1.8607034073083926e-07	1.4832279550003912e-06
964	ras_1	al	5.2208104	1.5418246	1.977664750826356e-07	1.5669321320234728e-06
970	ras_1	CG9503	5.2049866	3.0649116	2.2469302118966482e-07	1.7650329361431292e-06
990	ras_1	CG10163	5.1448817	1.6441524	2.987058054875631e-07	2.3030468616373036e-06
1022	ras_1	NT1	5.045716	1.5292476	5.029310906718152e-07	3.7515388267592715e-06
1029	ras_1	CG32706	5.0331693	1.7516432	5.354012377741943e-07	3.97435789367171e-06
1040	ras_1	slbo	4.999593	3.4051414	6.629451225969718e-07	4.823569785747197e-06
1044	ras_1	CG9119	4.9974847	1.8952249	6.525910467108844e-07	4.763343558927895e-06
1068	ras_1	Tmc	4.9239063	1.6490433	9.495114170305064e-07	6.779585409536885e-06
1071	ras_1	CG3842	4.92046	2.7262263	9.570171483665824e-07	6.827863403004194e-06
1087	ras_1	CG9411	4.8775964	1.7578886	1.1723437389583492e-06	8.254991408244709e-06
1091	ras_1	CG34034	4.8652	1.943306	1.2727168218185951e-06	8.922732725657372e-06
1093	ras_1	CG12071	4.851249	1.8702292	1.349708177959636e-06	9.41716542416704e-06
1102	ras_1	scpr-C	4.8298473	3.4305508	1.550899820859421e-06	1.0723063946032547e-05
1107	ras_1	CG13227	4.815805	2.1728692	1.6256962886098136e-06	1.122329830548912e-05
1116	ras_1	CG45061	4.795797	3.324499	1.8192009884785527e-06	1.2437532838517676e-05
1125	ras_1	Cyp6a9	4.765801	2.6721373	2.062851050400899e-06	1.3957712675094578e-05
1135	ras_1	CG8927	4.7396655	2.549645	2.3769476469321135e-06	1.5906998293655826e-05
1139	ras_1	CG1143	4.7339835	3.8043854	2.4855035442871614e-06	1.6609246189974297e-05
1146	ras_1	CG14304	4.713349	2.6714702	2.660751853606021e-06	1.7688872738320174e-05
1149	ras_1	CG9686	4.7084126	2.5455935	2.725564681513219e-06	1.808174689290223e-05
1150	ras_1	CG11155	4.703422	2.0239577	2.8122206693423413e-06	1.8589426974939465e-05
1155	ras_1	CG8870	4.686695	1.7428176	2.978972886892598e-06	1.964922806415499e-05
1158	ras_1	CG44006	4.6774597	3.9921386	3.281378462923051e-06	2.1489398570534613e-05
1163	ras_1	CG34225	4.6663055	4.342167	3.4605402346531642e-06	2.2566067272880443e-05
1180	ras_1	Try29F	4.620737	1.5774809	4.1199581470057135e-06	2.6508145861695248e-05
1184	ras_1	dimm	4.616581	3.9476798	4.36110895903627e-06	2.7883745434953155e-05
1197	ras_1	CG11409	4.5850005	1.5810407	4.8625904205980165e-06	3.0874925334938965e-05
1219	ras_1	mas	4.527411	1.725852	6.497683998606024e-06	4.047267527984404e-05
1244	ras_1	CG31706	4.4661484	2.4490309	8.511475047775765e-06	5.199253233245183e-05
1261	ras_1	CG9864	4.4438076	2.426776	9.594661520426025e-06	5.774148818955746e-05
1263	ras_1	Cyp6a22	4.44104	1.9741377	9.636948300904779e-06	5.7865838128796694e-05
1274	ras_1	CG33514	4.4164696	1.6647345	1.0753339090443657e-05	6.406615984079256e-05
1317	ras_1	sug	4.3223333	1.5118817	1.6340098793625098e-05	9.452736849401656e-05
1339	ras_1	CCAP-R	4.2809424	4.3396025	2.0302672969194903e-05	0.00011491488247523951
1358	ras_1	CG9861	4.2431927	1.96907	2.335254806304212e-05	0.00013084855035465316
1360	ras_1	CG3919	4.240336	1.6541872	2.3642605741483436e-05	0.00013226884614518934
1373	ras_1	CG31140	4.2186966	3.639203	2.6502808526822155e-05	0.00014657219302808514
1381	ras_1	Eip93F	4.2043247	3.1582859	2.8113119795331278e-05	0.00015454635956990083
1389	ras_1	CG43340	4.1925435	1.8185226	2.8850719056854664e-05	0.00015812744763837606
1397	ras_1	CG31473	4.1720686	1.6007724	3.1609797704631376e-05	0.0001721186314183934
1402	ras_1	nAChRalpha6	4.1658382	2.6198351	3.324100317772931e-05	0.00018014542478184665
1406	ras_1	qjt	4.157258	2.4305108	3.41925163184621e-05	0.00018453902189522928
1436	ras_1	CG34220	4.1096654	1.9250023	4.1845518726207465e-05	0.00022179817118021575
1437	ras_1	cpo	4.106623	1.7669109	4.2204949535083886e-05	0.00022331626988719418
1445	ras_1	CG7737	4.100253	2.102421	4.374005357534382e-05	0.00023024382762695326
1447	ras_1	Culd	4.0958858	1.6563696	4.384380923201467e-05	0.0002306576546466368
1469	ras_1	CG32700	4.044163	3.3490014	5.602619611681551e-05	0.0002891115575769304
1472	ras_1	CG4269	4.0367136	1.9616151	5.723072664164824e-05	0.00029466437538559065
1478	ras_1	Gs1	4.0257177	3.8228054	6.0750229972244006e-05	0.00031051997771328066
1486	ras_1	GstE2	4.017107	1.5131055	6.143051450710025e-05	0.00031364772988461034
1487	ras_1	CG14196	4.0152397	5.9278564	6.375746036113519e-05	0.00032408570571380353
1488	ras_1	Cyp4aa1	4.014999	4.235723	6.371639722649298e-05	0.00032405651028440856
1495	ras_1	pyd3	4.0033	3.3451293	6.63512170329253e-05	0.0003361526318481997
1499	ras_1	CG13731	3.9985285	2.823511	6.727051687751106e-05	0.00034024641254198673
1523	ras_1	Sh	3.9355807	3.1736455	8.793709383008211e-05	0.0004373023500764246
1533	ras_1	Acox57D-d	3.916919	2.7943358	9.492911301659616e-05	0.0004690224081460796
1539	ras_1	CG8563	3.9036238	2.7461264	0.00010002619842582168	0.0004899841807564944
1557	ras_1	Cow	3.8841038	3.6157854	0.00010886566742632217	0.0005282086190568514
1560	ras_1	CG8539	3.8799667	1.8625844	0.00010826196987350795	0.0005258356662728615
1561	ras_1	CG6071	3.8778124	2.469483	0.0001108604310503693	0.0005369006140458785
1564	ras_1	CG30099	3.875486	1.8047334	0.00011150842458239418	0.0005393198711351959
1573	ras_1	CAH2	3.8632205	2.91954	0.00011786819897184829	0.0005670900501136383
1579	ras_1	CG15211	3.8498726	3.517732	0.00012481133197412756	0.0005976743062957308
1584	ras_1	eEF1alpha2	3.8437684	2.2413507	0.0001270040233363441	0.0006065913139567709
1632	ras_1	CG30495	3.774944	1.6877788	0.0001658891296364615	0.0007714306966115226
1633	ras_1	CG42541	3.7741876	1.6103584	0.00016614648712925012	0.0007718450731194278
1635	ras_1	CG11426	3.7714183	1.8107249	0.00016843472312445874	0.0007812884654534424
1639	ras_1	CG5955	3.7668052	1.8330698	0.00017167253390363278	0.0007950272616756868
1643	ras_1	Uros2	3.7632847	3.6215951	0.00017676657439092712	0.0008158115291935394
1706	ras_1	Cpr49Ae	3.6732807	2.5739338	0.0002494446147367357	0.0011131587257828552
1708	ras_1	CG8420	3.6697416	1.5183535	0.0002512138338668319	0.0011194205564488502
1713	ras_1	Edg91	3.664942	2.3533711	0.0002568075774751159	0.0011404692755731794
1714	ras_1	CG31897	3.6645272	1.5044295	0.0002560773683650538	0.0011383284179987251
1735	ras_1	CG12519	3.6341407	1.5641742	0.00028759473717936384	0.0012625271357036667
1740	ras_1	Nckx30C	3.6279123	1.7438303	0.00029282593908870174	0.00128181201867311
1753	ras_1	kat-60L1	3.5985441	2.9640844	0.0003333489695702528	0.001442677733871259
1766	ras_1	CG13321	3.5831714	1.9444987	0.00035153949116476803	0.0015100069435565293
1772	ras_1	CG11786	3.5776262	2.4778469	0.0003597328251505795	0.0015437552248627536
1773	ras_1	Nplp1	3.573442	1.5204479	0.00036215093739191165	0.0015534057272420707
1786	ras_1	Rbp6	3.5560424	2.0429652	0.00038810409234189613	0.0016539038770259625
1794	ras_1	Slc45-1	3.5483325	24.282532	0.00040550707539139825	0.0017184884141875653
1799	ras_1	CG30413	3.536769	1.834911	0.0004171723267955995	0.0017621085695028562
1805	ras_1	CG1271	3.5309463	1.7599757	0.0004273609591682638	0.0017978160478536545
1815	ras_1	Prx2540-2	3.5214353	2.9087248	0.00044649932740213616	0.0018714624618157145
1818	ras_1	Karl	3.5139368	3.3824985	0.0004592900281704345	0.0019198113933775564
1830	ras_1	TkR99D	3.4973638	2.094955	0.0004829441938301826	0.0020077086444911306
1844	ras_1	CG6026	3.4801567	1.713182	0.0005163846558264093	0.0021284048594821677
1850	ras_1	CG14591	3.4735634	2.5114193	0.0005309657746099172	0.002177742951294587
1852	ras_1	Cyp4d2	3.4720705	1.696839	0.0005304860961310577	0.0021767486279080745
1870	ras_1	CG43319	3.4506602	1.82663	0.0005752673104509453	0.0023413388028300057
1878	ras_1	fne	3.4440844	3.6591167	0.000595587470506086	0.0024083362899485847
1900	ras_1	CG7607	3.4166174	1.8354304	0.0006524338274338199	0.002616293866567001
1902	ras_1	CG15322	3.4153216	3.5983367	0.0006600307325603113	0.0026421387309078777
1913	ras_1	CG14565	3.395975	2.6288188	0.0007011216502088125	0.0027920100436917773
1914	ras_1	kar	3.3935668	1.5965269	0.0007082867296745064	0.0028156545687883865
1922	ras_1	Amt	3.3845375	23.090883	0.0007404003202109572	0.0029331489369324405
1924	ras_1	m	3.3822	3.0457497	0.0007428629091049925	0.002941634523538328
1927	ras_1	cpx	3.3799968	1.8625307	0.0007435331285980945	0.00294174922591096
1935	ras_1	Ir68a	3.3705878	1.8128247	0.0007696410483865536	0.0030319693512007857
1943	ras_1	CG44102	3.357769	1.5727355	0.0008046745960240742	0.0031537331988555663
1963	ras_1	pros	3.3225465	1.7544596	0.0009185377535476795	0.003548456374231562
1979	ras_1	gammaTub37C	3.2979465	3.252455	0.0010050094012562097	0.0038404925843171455
1997	ras_1	Obp44a	3.274912	1.7643305	0.001082974934575419	0.0041008233696778655
2001	ras_1	Cpr65Av	3.268321	3.2029514	0.001115172169436058	0.0042123115086767525
2003	ras_1	Eh	3.264435	23.005693	0.0011336516900055296	0.0042686113410198194
2004	ras_1	Peritrophin-A	3.2640624	1.9429127	0.0011260589737661655	0.004246441053968175
2011	ras_1	amn	3.2589707	22.734167	0.001155480370475585	0.004337779214039891
2018	ras_1	CG12009	3.2538054	2.0844932	0.0011639645949337134	0.004365284285219234
2039	ras_1	Hsp70Ba	3.2382894	2.4735653	0.0012336186112940559	0.004586082155033616
2041	ras_1	CG34021	3.2304027	5.0184865	0.0012752163288533998	0.004734969573949795
2042	ras_1	Lcp65Ag3	3.2257726	2.6832228	0.001291137008730972	0.00478440309172321
2046	ras_1	CG12963	3.2223105	1.7141448	0.0012933985243837936	0.004788915036812473
2062	ras_1	CG15912	3.1968236	1.797732	0.0014155176388284656	0.005198094579736891
2068	ras_1	CG30172	3.1940014	3.2671494	0.0014416573962788707	0.005274005825701211
2078	ras_1	Gpb5	3.1731539	23.031603	0.0015534693163804655	0.005647020989615994
2101	ras_1	CG12605	3.1549735	4.7675023	0.0016518408243472037	0.0059480532038405
2116	ras_1	CG1468	3.1347005	2.5318372	0.0017578162145029006	0.00628280629842778
2123	ras_1	Dlip3	3.1249485	1.8191298	0.0018156206120377991	0.0064717634481145335
2137	ras_1	metro	3.1097178	2.1461215	0.0019101616975704366	0.006758863700427596
2158	ras_1	Ccp84Ac	3.085326	23.213802	0.0020886263682476547	0.007305812782566615
2169	ras_1	Dgat2	3.0671775	1.7855202	0.002192681586740326	0.0076406583966359635
2173	ras_1	PGRP-LF	3.0624025	3.2278063	0.0022471074128282333	0.00780068502183089
2186	ras_1	Myo81F	3.0418124	23.162355	0.0024123061196103927	0.008317515463143688
2189	ras_1	CG13970	3.0405834	1.722424	0.0024019965909000255	0.00829131629853564
2190	ras_1	CG42240	3.03897	1.542239	0.0024108029797206684	0.008315457646216967
2192	ras_1	sm	3.037832	1.9092331	0.002430366661889631	0.00836720980219038
2199	ras_1	CG18636	3.0317383	22.71566	0.002493522663459733	0.008554916425811788
2200	ras_1	CG5509	3.031405	4.620499	0.002494212690904254	0.008554916425811788
2205	ras_1	gol	3.0252995	2.0221572	0.0025236244249346993	0.008646099364740803
2210	ras_1	CG9184	3.0214117	5.0633936	0.002578262318980077	0.0088102632315241
2211	ras_1	CG32695	3.0196934	2.9872954	0.0025739290828018855	0.008798732986105551
2216	ras_1	CG15531	3.0121746	1.6799442	0.0026369146206433867	0.008980583386935068
2218	ras_1	CG13920	3.0108476	3.2191184	0.0026549628636411194	0.009035342831567978
2239	ras_1	CG3225	2.9869	1.7443846	0.0028652266130843804	0.009654224816397059
2263	ras_1	CG31221	2.964407	2.51682	0.0030886784348546957	0.010293724896400958
2273	ras_1	CG15418	2.956116	4.929328	0.0031870623202796405	0.01055642483341722
2279	ras_1	CG8925	2.9509106	4.6821966	0.0032394571570999583	0.010702923808567561
2302	ras_1	Scgbeta	2.9246387	22.795822	0.0035256341173204885	0.01153215437661871
2305	ras_1	KFase	2.922091	1.60666	0.0035287187373502123	0.01153813058274704
2323	ras_1	CG42390	2.902009	1.8402728	0.0037625204957378567	0.01220690436647625
2327	ras_1	shakB	2.8976378	2.910266	0.003830365567299697	0.012413848138458042
2332	ras_1	Gr93b	2.8923285	21.588655	0.003906034760263636	0.012632311922953422
2372	ras_1	CG15213	2.852701	4.034404	0.0044199120411054695	0.014051522168102109
2373	ras_1	CG4587	2.852485	3.6399016	0.004415973952802639	0.014043868636729365
2374	ras_1	CG11241	2.850186	1.6015098	0.004422347276417934	0.0140543942712624
2375	ras_1	CG34205	2.8477333	2.0675454	0.0044694501403035325	0.014184436194149053
2396	ras_1	Sur	2.8356297	3.6561446	0.004654491946830685	0.014660131689725896
2410	ras_1	OtopLa	2.8244681	1.970232	0.004808241374252794	0.015056523757259176
2413	ras_1	CG43740	2.8209622	4.680403	0.004879327817592073	0.015258293362783665
2416	ras_1	CG9121	2.8174994	1.8714621	0.004904440410792987	0.015331598217725947
2417	ras_1	nAChRbeta2	2.817112	3.3733582	0.0049290917185995245	0.015391710657742474
2428	ras_1	Rdl	2.805457	1.8764461	0.005092145502661505	0.015842806031508748
2471	ras_1	Muc68Ca	2.7607276	1.7050344	0.005838098886267119	0.01782514385407681
2480	ras_1	CG15649	2.756129	22.336384	0.005954302216864982	0.018089643324415965
2502	ras_1	tow	2.7358437	2.5119483	0.006306852769446425	0.019028403209362364
2503	ras_1	H15	2.735689	1.6141896	0.006298549542816085	0.01901585786618545
2513	ras_1	CG9498	2.7254987	23.172829	0.0065314656064764795	0.019628626576947823
2515	ras_1	acj6	2.724014	3.4542458	0.006545103135477836	0.019655401289915622
2518	ras_1	CG14688	2.722165	1.9562763	0.006542362014976874	0.019654934999152857
2522	ras_1	CG13707	2.7204084	22.34644	0.0066321166077224596	0.01986603652492771
2524	ras_1	Syt4	2.718166	2.6085105	0.006659069101634246	0.019907774195990293
2532	ras_1	CG16978	2.7117603	23.144045	0.006806334402947527	0.020269494508308544
2547	ras_1	Ugt37E1	2.699623	1.9924982	0.007015576866256317	0.020790671107203392
2569	ras_1	Ccp84Ab	2.671891	3.2386699	0.007641574831404106	0.022464418160247572
2578	ras_1	CG34316	2.663208	1.7310737	0.007830356631779927	0.02292390622098942
2585	ras_1	CG6118	2.654219	1.6398529	0.008015704254102855	0.023406774834943887
2596	ras_1	Corin	2.6465626	3.2839577	0.00823668524079136	0.023922629656302857
2601	ras_1	Cpr49Aa	2.6419275	4.59821	0.008369324289874474	0.02428480403529358
2608	ras_1	nvd	2.6305468	21.903051	0.008654511813252398	0.025064755646019808
2614	ras_1	cona	2.6224208	2.4228957	0.008833545204354832	0.025518821552253015
2615	ras_1	Hk	2.6209993	4.184542	0.008892918900842092	0.025659447395718942
2618	ras_1	CG8219	2.6172636	2.460649	0.008967711930814862	0.025857560328480942
2620	ras_1	CG32259	2.6161995	2.208566	0.00899011354895332	0.025889608227133303
2634	ras_1	CG31883	2.6052995	4.020978	0.009306648209040883	0.02665891268122076
2643	ras_1	blanks	2.5981388	1.7109677	0.009462206808404488	0.027053832180464688
2644	ras_1	CG5194	2.5971742	2.8897047	0.00950785539711483	0.027167416153387903
2645	ras_1	CG2121	2.5969677	3.0209198	0.009529751942068104	0.027221505002638497
2662	ras_1	qtc	2.581177	1.7285118	0.00992922613527153	0.02816965052291784
2668	ras_1	Mlp60A	2.5769134	3.966744	0.010101098813547942	0.028595366125980366
2670	ras_1	CG42594	2.5743284	1.9367179	0.01014533303611716	0.028702877152752066
2671	ras_1	Ugt35C1	2.5733182	22.346222	0.010214569964884112	0.028852704356977017
2677	ras_1	CG30187	2.5678492	2.7679834	0.010359722038421297	0.02922830556657915
2695	ras_1	CG32532	2.542458	2.861126	0.011126953232474675	0.031143927976801447
2698	ras_1	vilya	2.5407372	21.760872	0.011210629843526259	0.03133034688222767
2709	ras_1	CG32712	2.5303788	3.8107455	0.01154035245741344	0.03213436534044562
2710	ras_1	CG42404	2.5293398	2.626362	0.011544523468085516	0.03213622658364218
2713	ras_1	fan	2.5255156	2.2235217	0.011682436449025054	0.032480713460546935
2715	ras_1	en	2.524008	1.5274459	0.011699246624404528	0.03251759702481416
2718	ras_1	CG2269	2.5188198	1.7619141	0.011882740394511185	0.03299762200957631
2725	ras_1	Tsp29Fa	2.5127306	2.3413866	0.012095981932629197	0.03348812951752559
2729	ras_1	CG16798	2.5101197	22.695082	0.012224448106182893	0.03380328853955034
2732	ras_1	HLH3B	2.5061846	3.1260743	0.012344686529701809	0.034088490204331856
2741	ras_1	CG13658	2.4988985	21.509855	0.012615902916825376	0.03473916844594022
2751	ras_1	dati	2.4888337	5.45807	0.01297534105714077	0.035611353335108155
2757	ras_1	tty	2.4810128	4.1240535	0.013259968857352642	0.03630564436473008
2759	ras_1	CG12038	2.4782534	21.776863	0.013365232173569063	0.0365415099576149
2760	ras_1	CG4660	2.4774673	3.1625428	0.013382394515937321	0.03656446387246126
2763	ras_1	CG9522	2.476546	2.4686258	0.013374213198633795	0.03655299556075813
2772	ras_1	CG42711	2.4682066	4.0206656	0.013735455363135493	0.037406590370070686
2778	ras_1	CG15705	2.463779	1.8176734	0.013872149551616742	0.03773405637002183
2785	ras_1	Ag5r	2.4585078	2.752925	0.014093974914310421	0.038258053206745
2787	ras_1	Cht8	2.4575715	1.8182007	0.014106159026164706	0.03826000078320431
2789	ras_1	klg	2.4565213	2.5472674	0.014168069972195312	0.03839103425720378
2795	ras_1	CG13297	2.4526997	21.348703	0.014347095268469215	0.03871605855535443
2805	ras_1	CG2082	2.4474382	3.6581445	0.01454254508559626	0.03915136477709674
2813	ras_1	CG9928	2.4401019	3.3027532	0.014840142792600113	0.039808646402011975
2815	ras_1	CG32284	2.439603	3.490154	0.01485610956735575	0.039808646402011975
2822	ras_1	tim	2.4325037	4.0095625	0.015158822803331692	0.040548746128445556
2824	ras_1	Cyp317a1	2.4311528	1.5686897	0.015163354985953014	0.04054904750688397
2848	ras_1	Rab3	2.4068327	3.1774096	0.016251106029729633	0.04305628005277776
2850	ras_1	Yp3	2.4056234	1.9050692	0.016274796545778607	0.04310659881856776
2858	ras_1	CG10041	2.397724	2.3851979	0.01665960977406334	0.0440114942922635
2859	ras_1	CG7781	2.3968475	2.9987135	0.01667986546024379	0.04405232170343603
2866	ras_1	CG13744	2.3904781	1.9766767	0.016964140632764694	0.044661690188125124
2870	ras_1	CG3699	2.3888807	22.591045	0.017082538613955194	0.04489610191436233
2876	ras_1	Eglp2	2.38543	1.9956118	0.017199842486588	0.045126838665840684
2879	ras_1	f	2.384319	21.35219	0.017294550769941627	0.04531053778247128
2885	ras_1	CG45066	2.3807275	3.4741738	0.017443634076437734	0.045635968819879164
2889	ras_1	CG34328	2.3749192	3.5122824	0.017728184568216017	0.04626546300328364
2897	ras_1	Lime	2.3716962	22.005548	0.017893334011400586	0.04661310038461112
2902	ras_1	CG5065	2.3667002	1.9039123	0.01808839835143819	0.047054452757143574
2903	ras_1	CG18810	2.3665957	1.5828696	0.018071331892353024	0.0470367291098834
2910	ras_1	Vajk2	2.3614638	2.2607498	0.018364574226279403	0.047637819769893563
2914	ras_1	CG13067	2.359288	22.415829	0.01849957485316261	0.047920270829409084
2917	ras_1	CG33177	2.3571208	21.149784	0.018607298175540545	0.04814494099283263
2929	ras_1	Gr47b	2.3457623	1.9260153	0.01913997887002751	0.04934231698019174
2935	ras_1	Pex7	2.340772	22.187296	0.019437715122447435	0.04994148312754277
8556	ras_1	CG9150	-2.3842726	-3.1256957	0.01726037072511025	0.045233904999396335
8557	ras_1	B-H1	-2.3852353	-1.5262526	0.01719834554251434	0.045126838665840684
8564	ras_1	Scr	-2.4136953	-2.6043017	0.015927030287129336	0.042332127139169076
8571	ras_1	superdeath	-2.4406803	-2.312186	0.01480234987710488	0.03972259728646893
8576	ras_1	Cyp6a13	-2.4515169	-2.659997	0.014343664766435492	0.03871605855535443
8579	ras_1	CG3588	-2.4544451	-4.232761	0.014266938587136846	0.03858878333185762
8586	ras_1	Pgant2	-2.501565	-2.9515407	0.0124995469703882	0.034470496980256005
8589	ras_1	CG5756	-2.5154178	-4.569531	0.012035155617298472	0.03335021225874765
8592	ras_1	Lst	-2.5356433	-1.5069345	0.011334096527504948	0.03163685294793365
8603	ras_1	CG43980	-2.5742445	-1.7949015	0.01013735477714035	0.028689151782931126
8613	ras_1	CG7296	-2.619797	-1.843336	0.008893410650505312	0.025659447395718942
8617	ras_1	Awh	-2.6480136	-2.3098445	0.008193851937513402	0.023835951657160893
8633	ras_1	CG14795	-2.7114708	-1.8102361	0.006786444247361603	0.020235822544537766
8650	ras_1	mey	-2.7909868	-1.8184334	0.0053266808769074905	0.016477510804324417
8653	ras_1	ss	-2.7941544	-2.2546527	0.00528224608635469	0.01636931195463003
8664	ras_1	nemy	-2.8634608	-1.6415067	0.004236345698641197	0.013519468446967992
8680	ras_1	Jheh1	-2.9405198	-1.792145	0.003323703774421434	0.010953657374395352
8681	ras_1	Cpr78Cc	-2.9408813	-3.462703	0.0033408543858438546	0.01099438270807653
8690	ras_1	CG5888	-2.972523	-6.5103307	0.0030214455457459456	0.010110052108759681
8692	ras_1	pk	-2.9865952	-1.6356704	0.0028673751216978793	0.009657917306012497
8701	ras_1	rn	-3.0167613	-2.132629	0.0026055974381028915	0.008893733814953135
8703	ras_1	net	-3.0220542	-1.612086	0.002549799292699699	0.008722747393929805
8708	ras_1	GLaz	-3.0483868	-2.8449533	0.002351556007373096	0.008138636879535328
8719	ras_1	CG7016	-3.096481	-2.614488	0.0020015178685820734	0.007044083791423293
8727	ras_1	twit	-3.1346383	-1.9898672	0.0017560579792554162	0.006281415968681654
8739	ras_1	fend	-3.1969545	-1.8779175	0.0014202204592095094	0.0052080426511779574
8759	ras_1	Spn43Ab	-3.3019683	-3.0683212	0.0009879535129786194	0.0037847488440830197
8770	ras_1	bora	-3.3284352	-2.1033819	0.0008933241993245931	0.0034612540239878135
8782	ras_1	CG8854	-3.3587174	-1.551941	0.0008018879737424591	0.003146844379421327
8785	ras_1	Lcp65Af	-3.4022102	-2.3299236	0.0006896796292363455	0.0027488317107921246
8790	ras_1	dgt6	-3.4293358	-1.6930195	0.0006216967628435798	0.0025050802806718684
8793	ras_1	CG15353	-3.4651775	-2.6484084	0.0005477194234129909	0.0022394499598102457
8799	ras_1	Syt1	-3.4959114	-1.5441436	0.00048563405272222565	0.002017063120745324
8800	ras_1	CG14598	-3.5003517	-1.7840773	0.0004795191902810968	0.0019960102239535427
8818	ras_1	CG32447	-3.6242287	-1.9345596	0.0002991928635165471	0.001306565693843084
8838	ras_1	AstC	-3.8043978	-4.4988875	0.0001502324593801324	0.0007043346013350612
8856	ras_1	E(spl)m5-HLH	-3.9408257	-3.9545786	8.620917864503223e-05	0.00042940782522701994
8862	ras_1	Ppn	-3.9942858	-2.5872107	6.871260253519664e-05	0.00034658500728995553
8883	ras_1	PolE2	-4.140454	-1.8943762	3.658735952306562e-05	0.0001963093705404252
8889	ras_1	Actbeta	-4.1754217	-2.622624	3.175371992511753e-05	0.00017279975107529856
8890	ras_1	CG4766	-4.178692	-3.0729995	3.154442311049745e-05	0.000171864656792645
8899	ras_1	CG43293	-4.264525	-2.112556	2.1244274718424392e-05	0.00011965391070690227
8906	ras_1	CG15522	-4.3083925	-2.4413033	1.7759659393121702e-05	0.00010190423698054511
8915	ras_1	AdamTS-A	-4.4316454	-1.5614673	1.004797169920391e-05	6.021563706087256e-05
8918	ras_1	Nep2	-4.465046	-1.7811626	8.665820643617655e-06	5.275679220653404e-05
8926	ras_1	Klp67A	-4.5287094	-1.6287247	6.42495023535673e-06	4.01013050404068e-05
8933	ras_1	CG42326	-4.6241107	-1.9923137	4.117870530681921e-06	2.6508145861695248e-05
8940	ras_1	Idgf6	-4.6768045	-1.8501685	3.1838858395091846e-06	2.0930060376399848e-05
8957	ras_1	drl	-4.8580933	-2.1790257	1.3303184179568552e-06	9.296017886332176e-06
8960	ras_1	dac	-4.8632774	-1.6388837	1.2730089523580927e-06	8.922732725657372e-06
8966	ras_1	atilla	-5.011711	-2.1492145	6.134531009524152e-07	4.506350841664059e-06
8978	ras_1	CG9338	-5.158326	-1.5652897	2.8065740199248647e-07	2.1766962496036043e-06
8988	ras_1	DIP-epsilon	-5.2849	-3.1156878	1.5002292552879111e-07	1.2127403891864833e-06
8991	ras_1	toe	-5.33049	-2.0768254	1.1268925209174165e-07	9.223228259961905e-07
8997	ras_1	CG17029	-5.406737	-2.2212703	7.62577211455584e-08	6.401322886646829e-07
9001	ras_1	so	-5.499061	-2.4007876	4.5737385173931626e-08	3.9551414606109583e-07
9003	ras_1	CG32373	-5.526557	-1.8252776	3.904063819189922e-08	3.411408146768337e-07
9009	ras_1	Ama	-5.6433663	-1.6984257	1.9787696770361527e-08	1.8011122804371727e-07
9031	ras_1	bi	-5.9839344	-1.5704089	2.701638934628901e-09	2.7450207336899408e-08
9041	ras_1	Obp83g	-6.1272607	-1.863976	1.139617479036592e-09	1.2134768746797488e-08
9044	ras_1	CG1136	-6.196048	-3.562894	8.077158600662772e-10	8.759802619513112e-09
9055	ras_1	rdo	-6.3219748	-2.7231057	3.590565707582874e-10	4.0520836859868224e-09
9056	ras_1	Ts	-6.322817	-1.5584769	3.296585502915924e-10	3.743338117481882e-09
9066	ras_1	CG15611	-6.4455476	-1.634836	1.519386525098163e-10	1.8270473614384855e-09
9069	ras_1	CG6739	-6.5537252	-2.1487627	7.648867798209184e-11	9.458000276087502e-10
9079	ras_1	nec	-6.750128	-2.0592482	2.1864255454515794e-11	2.8863963135997473e-10
9103	ras_1	CG6753	-7.2295356	-1.7333299	7.714833803330323e-13	1.2120479476978718e-11
9111	ras_1	slow	-7.56655	-1.9574919	6.659922180558797e-14	1.1336694991953054e-12
9113	ras_1	CG7294	-7.64331	-2.091395	3.859842709828203e-14	6.745534640509288e-13
9130	ras_1	mab-21	-8.292244	-1.7937547	2.3224534591580966e-16	4.978623945741947e-15
9131	ras_1	IP3K2	-8.396246	-1.5755605	1.0311854118565144e-16	2.250451506760095e-15
9135	ras_1	CG6347	-8.782055	-3.0680082	5.3247182127284714e-18	1.2526740923534289e-16
9136	ras_1	E(spl)m4-BFM	-8.811175	-2.4971933	4.0127687824015536e-18	9.488957107869653e-17
9147	ras_1	CG6044	-9.314433	-1.9804294	4.337212631471583e-20	1.1738621207596396e-18
9155	ras_1	kuk	-9.872456	-1.7870921	2.5056432271170607e-22	8.181237227330615e-21
9156	ras_1	Gasp	-10.024532	-1.6079298	5.02694812632676e-23	1.6894596724926016e-21
9157	ras_1	E(spl)m7-HLH	-10.228512	-2.132418	9.711558636309526e-24	3.4536259879123994e-22
9161	ras_1	E(spl)m8-HLH	-10.663057	-2.5651557	1.5672874335046692e-25	6.391049867735707e-24
9163	ras_1	Kank	-10.779304	-1.5256574	3.068844040094102e-26	1.334438107481677e-24
9167	ras_1	PGRP-SA	-12.28218	-1.7925419	2.8637831296605053e-33	1.904000740190952e-31
9171	ras_1	CG11275	-13.760079	-1.9154837	7.99746346176504e-41	8.434106581803936e-39
9173	ras_1	CG9427	-15.269715	-2.4344661	9.508709519183544e-49	1.5305685936580529e-46
9175	ras_2	CG1572	23.68576	1.9429787	3.6169297598306234e-106	1.6592665273222985e-102
9176	ras_2	mnd	19.272818	2.0476606	5.242828292396843e-73	9.620589916548206e-70
9177	ras_2	chinmo	18.181156	1.546271	4.235413782009196e-67	5.551417349990624e-64
9185	ras_2	sbb	15.528928	1.5351689	5.285702162445281e-50	1.8652429746321328e-47
9189	ras_2	CG9427	14.427906	2.28558	2.9761572899268893e-43	6.501486460733146e-41
9193	ras_2	CG11275	13.943458	1.9250683	3.4909378323403467e-41	6.043274455042015e-39
9197	ras_2	Msr-110	13.494401	1.6236175	9.547142953441549e-39	1.2694932840264669e-36
9204	ras_2	trn	13.036417	1.6784046	1.4104483059588077e-36	1.48745554105426e-34
9208	ras_2	Gasp	12.765597	2.1656492	7.243731370335279e-35	7.224047317698498e-33
9211	ras_2	caup	12.455726	1.8326182	1.4300010154632981e-33	1.299035575928293e-31
9215	ras_2	olf413	12.272598	1.6366311	1.0856646133607232e-32	9.055429843258758e-31
9218	ras_2	robo2	12.180195	1.6551522	2.7207733009651936e-32	2.2489274807527613e-30
9229	ras_2	PGRP-SA	11.476034	1.6772696	4.44859540790231e-29	3.092110823295734e-27
9233	ras_2	E(spl)m7-HLH	11.323409	2.5151381	5.290773747595436e-28	3.3946048345586103e-26
9247	ras_2	Kank	10.788883	1.5279998	4.5883269695410284e-26	2.566945118630423e-24
9250	ras_2	IP3K2	10.649803	2.189081	3.9459118195825026e-25	2.0927017887092172e-23
9254	ras_2	CG6044	10.46564	2.280903	1.711678389811616e-24	8.676601782608607e-23
9262	ras_2	E(spl)m8-HLH	10.317141	2.520027	9.188404815466333e-24	4.323262265738646e-22
9282	ras_2	CG17032	9.813218	1.5573205	6.787142908718001e-22	2.73122965734595e-20
9288	ras_2	mab-21	9.6212435	2.18377	4.598027616629718e-21	1.728971450105642e-19
9290	ras_2	Tdc1	9.557152	1.8592762	7.928907439157613e-21	2.9452520548287896e-19
9291	ras_2	side-V	9.54571	1.6465033	7.545586563051579e-21	2.814258403089359e-19
9315	ras_2	CG34445	9.130653	1.5644773	2.8162524388306075e-19	8.910040043541663e-18
9319	ras_2	kuk	9.042414	1.606614	5.55203963216518e-19	1.703677713214566e-17
9333	ras_2	shf	8.817495	1.5954717	4.171987913430195e-18	1.2037103492365422e-16
9349	ras_2	slow	8.521265	2.3663173	5.971380694038906e-17	1.5653547962230559e-15
9366	ras_2	CG7294	8.239348	2.3748364	5.496321532783186e-16	1.3235892405061871e-14
9373	ras_2	CG46339	8.075507	1.511202	1.5430528540171245e-15	3.557163300403798e-14
9382	ras_2	CG16888	7.9207983	1.6496829	5.9478034066056e-15	1.2993118156096756e-13
9395	ras_2	CG15611	7.7593226	2.127223	2.0905067609094198e-14	4.3102021418750397e-13
9406	ras_2	E(spl)m4-BFM	7.6606617	2.1470091	4.303122383731182e-14	8.582858232768174e-13
9409	ras_2	eyg	7.6350193	2.0433123	5.033179762871661e-14	9.973957737440062e-13
9411	ras_2	CG6347	7.611029	2.500676	6.37196272336591e-14	1.2412475156450578e-12
9414	ras_2	CG6753	7.5717545	1.9416618	8.38863755489515e-14	1.6237499908473209e-12
9422	ras_2	esg	7.4818606	1.5347509	1.4703359919122223e-13	2.775788626706716e-12
9426	ras_2	nec	7.4631515	2.5048792	1.9831785786108803e-13	3.646425542836639e-12
9431	ras_2	Ance	7.4191275	1.7512425	2.320709620117769e-13	4.2103995952819505e-12
9439	ras_2	CG1607	7.367937	1.9368706	3.6052580207462323e-13	6.44800045620793e-12
9441	ras_2	CG6739	7.3414717	2.5655823	4.4591610721609627e-13	7.898224485922169e-12
9445	ras_2	ncd	7.2742386	1.5009562	6.363500933700954e-13	1.1099832902415637e-11
9446	ras_2	CG11073	7.269801	1.5737239	6.734358109795031e-13	1.1724428018476169e-11
9466	ras_2	Samuel	6.9647665	1.5019516	5.6811181509017295e-12	9.018037895246257e-11
9477	ras_2	mthl3	6.7809043	1.5540894	1.9635327768306136e-11	2.9975729163761866e-10
9500	ras_2	Obp83g	6.5106645	2.047046	1.1502827700123972e-10	1.6162089456146623e-09
9503	ras_2	Ts	6.4964566	1.6413661	1.2213097631753573e-10	1.70296612114497e-09
9509	ras_2	rdo	6.4687157	2.9494302	1.6259611463002607e-10	2.2433373710232922e-09
9515	ras_2	CG9752	6.4013414	1.5422994	2.23265937039669e-10	3.0347629219836488e-09
9567	ras_2	bi	5.889875	1.5956804	5.0942658512030535e-09	6.078008996721459e-08
9578	ras_2	CG3902	5.75775	1.6483088	1.0806564330829321e-08	1.2487434223596854e-07
9582	ras_2	mdy	5.7228894	1.6539842	1.3641165333397129e-08	1.5586263005469321e-07
9589	ras_2	dac	5.665581	2.0613666	1.9120350834952048e-08	2.155150109467875e-07
9590	ras_2	DIP-epsilon	5.64595	3.7735093	2.2566193404346206e-08	2.528019834980176e-07
9601	ras_2	Ama	5.595232	1.7166194	2.760848348032156e-08	3.051901637734341e-07
9605	ras_2	CG1136	5.575766	2.983929	3.254439645950814e-08	3.5759860780357746e-07
9615	ras_2	toe	5.5049706	2.196882	4.649915821910745e-08	5.001521414540572e-07
9620	ras_2	Sema5c	5.4805	1.9101623	5.261187043007212e-08	5.612952455766415e-07
9625	ras_2	drl	5.451728	2.760929	6.4995426748968e-08	6.846533185095079e-07
9626	ras_2	Idgf6	5.446933	2.3611596	6.515839152745378e-08	6.855828466334729e-07
9635	ras_2	so	5.367017	2.4468536	1.0147008435939503e-07	1.0495919098054672e-06
9637	ras_2	Syngr	5.3588986	1.7560475	1.0259064243506735e-07	1.0587954379547165e-06
9642	ras_2	CG9338	5.3276634	1.68031	1.2073407120694105e-07	1.2335580215185792e-06
9663	ras_2	ara	5.1940527	1.6069367	2.4019498571066224e-07	2.3747726227320327e-06
9694	ras_2	CG42326	5.0087595	2.313285	6.512734061616349e-07	6.054137286254306e-06
9700	ras_2	vvl	4.925133	1.9265473	9.902999443166312e-07	9.049802777993118e-06
9719	ras_2	CG7059	4.832553	1.9194516	1.566178583565983e-06	1.3843630543562517e-05
9727	ras_2	Ugt36D1	4.7913322	1.6169484	1.9059323031986316e-06	1.663837191422212e-05
9728	ras_2	asp	4.7905397	1.9399369	1.9195692194494175e-06	1.6741490103087838e-05
9768	ras_2	eya	4.587138	2.141193	5.067378476906403e-06	4.107172926291188e-05
9777	ras_2	AdamTS-A	4.5525346	1.6942861	5.923244643629262e-06	4.742213752643847e-05
9802	ras_2	CG32447	4.444929	2.6507437	9.82787918898188e-06	7.622213994835906e-05
9847	ras_2	CG34446	4.288007	1.9039708	1.9642768441303214e-05	0.00014348917233197213
9865	ras_2	CG8854	4.2264204	2.178678	2.600305767106432e-05	0.00018566385535565382
9888	ras_2	CG30195	4.1330576	1.5526716	3.840945280192988e-05	0.0002655664879108566
9897	ras_2	CG11788	4.1121435	1.6687375	4.251264840891978e-05	0.0002908676727455921
9898	ras_2	PolE2	4.110815	1.8576927	4.216706723553893e-05	0.00028893416122932765
9900	ras_2	atilla	4.1087446	1.742027	4.2908531956409745e-05	0.00029335751169900105
9913	ras_2	CG13041	4.075544	1.6114105	4.945669422466605e-05	0.0003316996853152858
9969	ras_2	AstC	3.8974514	5.220159	0.0001053600693270455	0.0006549313252545003
9979	ras_2	Cyp6a14	3.87963	1.5169414	0.00011103305249431002	0.0006860122940305013
10005	ras_2	salm	3.798469	1.5144621	0.00015265964059054754	0.0009130718399076099
10012	ras_2	rau	3.7745974	1.6675793	0.000168792023118624	0.0010017249754937746
10019	ras_2	Cht10	3.7540123	1.8326143	0.00018473797261792766	0.0010865198069035169
10034	ras_2	CG4766	3.6991148	2.5111423	0.00022807708839702161	0.0013185931229002352
10039	ras_2	pk	3.6858506	2.2794235	0.0002411373460173311	0.0013836367415315904
10063	ras_2	CG14598	3.596466	1.966621	0.00033888815323216244	0.0018798662671735734
10065	ras_2	dgt6	3.5842483	1.8915102	0.000354580846557503	0.001957930169934458
10067	ras_2	E(spl)m5-HLH	3.5779974	3.2960198	0.00036547688886373375	0.002011547963602134
10088	ras_2	Alg9	3.5033011	1.6228733	0.0004794722714167867	0.0025621188644432257
10101	ras_2	Fs	3.4710338	1.5778866	0.0005362858758710109	0.0028184380945665134
10110	ras_2	CG7016	3.4456182	3.3278854	0.0005974750851437912	0.003096492449523079
10120	ras_2	Ppn	3.416751	2.1387055	0.0006594580344304252	0.0033820723677468706
10162	ras_2	CG43245	3.3124459	1.6033422	0.0009510510092153701	0.004701450974973611
10170	ras_2	mey	3.2904794	2.4316049	0.001039089707448164	0.005095482664797918
10173	ras_2	CG15353	3.283213	2.4899173	0.001062851279798376	0.005198113268736727
10188	ras_2	nemy	3.2517061	1.8797944	0.0011790293132496522	0.00568748367458757
10219	ras_2	CG14502	3.1629033	1.6275371	0.001607020727439482	0.007507339701760309
10251	ras_2	Lcp65Af	3.0917652	2.0492117	0.0020403779106656196	0.009249242752152697
10257	ras_2	Trax	3.082573	1.6563276	0.0021043294113228333	0.009455055019043581
10265	ras_2	Spn43Ab	3.063931	2.8236353	0.002250494950480285	0.01004851329247128
10271	ras_2	B-H1	3.0460794	2.2417254	0.0023855362981373748	0.01057357272242049
10272	ras_2	CG15629	3.0394256	1.8453534	0.002434166221656785	0.010757935974807805
10295	ras_2	sc	2.9795513	1.6770868	0.0029529400926230354	0.012731778829800916
10320	ras_2	Lst	2.9314852	1.9702654	0.0034583787631901025	0.01455295300694323
10324	ras_2	Cht7	2.922134	1.5784929	0.00354212155754513	0.014850647592810877
10325	ras_2	Cpr78Cc	2.9217596	3.6750202	0.0035766443917777673	0.014963845095559057
10327	ras_2	CG43980	2.9072719	2.1965072	0.0037287510378561295	0.015473220611637263
10341	ras_2	B-H2	2.892258	2.2033446	0.0039094116338911095	0.016077477248297143
10343	ras_2	bora	2.8888595	1.7841773	0.003943010317896883	0.01617491222403244
10366	ras_2	sns	2.8499331	2.07389	0.004453455735330164	0.017984355797383035
10383	ras_2	fend	2.8051097	1.537945	0.005100700800984392	0.020189357139357978
10396	ras_2	Ctf4	2.7733526	1.8561369	0.005659185442095554	0.02208550677636185
10420	ras_2	superdeath	2.7273135	2.9865339	0.006518305343468318	0.024950125793208933
10426	ras_2	Awh	2.7170599	2.5401523	0.006712124830039475	0.0255322327179155
10430	ras_2	kon	2.7140121	2.067092	0.006751965627841156	0.025673139094671615
10434	ras_2	Scr	2.7065902	3.3169494	0.0069303726410003905	0.026231917896525816
10465	ras_2	CG44163	2.656057	2.7096183	0.008034450433227083	0.029736217315392693
10475	ras_2	esn	2.6351812	1.595232	0.008531077855001054	0.0313592304966485
10499	ras_2	Reg-2	2.592074	1.5079836	0.009661180044787528	0.03472045707439309
10519	ras_2	Lsd-1	2.5674274	2.3737385	0.010398585897718702	0.03682247225456159
10524	ras_2	ss	2.5596738	2.124724	0.010632156528721473	0.03751339407573074
10530	ras_2	AhcyL2	2.554278	1.6727799	0.010798858764756494	0.03794696636026076
10531	ras_2	CG32091	2.5534935	2.2822583	0.010820411237871598	0.037979063927877546
10559	ras_2	rn	2.5002587	1.6979783	0.012550029082237433	0.04297206636429153
10591	ras_2	tinc	2.4364533	1.5232316	0.015004014659819856	0.0499679980050262
17013	ras_2	CG31883	-2.435028	-3.3086886	0.015010020893398677	0.049969862734736165
17016	ras_2	dati	-2.4435189	-4.74543	0.014678938106151495	0.04904561439327748
17017	ras_2	CG9813	-2.4451997	-1.5343512	0.01457224218887049	0.04874237042759269
17023	ras_2	CG13297	-2.4514973	-21.030682	0.014361443890388178	0.04817778709115595
17024	ras_2	Dgat2	-2.453543	-1.5316803	0.01423614325313857	0.047812960624499676
17028	ras_2	CG14285	-2.463201	-1.5225992	0.013863170993204674	0.04672835924417813
17033	ras_2	shakB	-2.4681141	-2.196625	0.013679951321661606	0.04619563981459155
17036	ras_2	Hk	-2.4737241	-3.4721484	0.013487805587042455	0.04564758991557157
17039	ras_2	CG12038	-2.4770079	-21.458712	0.013379419540836488	0.04534768167239556
17047	ras_2	CG14257	-2.4916346	-2.4293509	0.01282118831968813	0.04364912906609966
17053	ras_2	nAChRbeta2	-2.4947276	-2.660609	0.012701682699102566	0.043322653815712285
17057	ras_2	CG13658	-2.4976175	-21.191788	0.012629941174164841	0.043142111047268214
17066	ras_2	CG16798	-2.508819	-22.376476	0.01223839870369008	0.04211827010741053
17068	ras_2	CG13920	-2.5103977	-2.5057082	0.01213890420056917	0.04182292378528807
17089	ras_2	vilya	-2.5393825	-21.442726	0.01122431926972346	0.039216728598519705
17093	ras_2	CG8526	-2.5450003	-2.0193834	0.011011478709763784	0.038579401607838404
17095	ras_2	Sur	-2.5517275	-2.9436703	0.01080854396352311	0.03796645898366177
17096	ras_2	Cpr49Aa	-2.5529935	-3.8838449	0.010793264281685255	0.037941838997878244
17103	ras_2	CG4587	-2.5603428	-2.9271412	0.010544542571971993	0.03726740296527081
17104	ras_2	eys	-2.562171	-21.817928	0.01051754255707661	0.037200637224818
17111	ras_2	Ugt35C1	-2.5719042	-22.027822	0.010227949320116383	0.03633040457300341
17118	ras_2	Task6	-2.5803943	-21.711927	0.009981172570897649	0.03561606167109211
17132	ras_2	CG42390	-2.6014903	-1.6513491	0.009349135015915007	0.0338109238356406
17137	ras_2	ppk23	-2.609436	-2.3089037	0.00915132474744233	0.03320023905013182
17152	ras_2	nvd	-2.629025	-21.584852	0.008667278738959916	0.03174107302784343
17157	ras_2	CG32668	-2.6353831	-3.194919	0.008488662640308876	0.031240866315617302
17158	ras_2	CG31097	-2.6386826	-21.903774	0.008425575113852718	0.03105851814768931
17166	ras_2	onecut	-2.6622572	-22.882193	0.007860728381158524	0.029187447550436854
17171	ras_2	BomT3	-2.6678123	-21.7123	0.0077326684881540665	0.028840338771875428
17175	ras_2	Lcp65Ag3	-2.6802166	-1.9692237	0.007427461137761904	0.0278150840567206
17179	ras_2	CG15213	-2.6870577	-3.3212776	0.007294201473153614	0.027394309666878596
17180	ras_2	CG30187	-2.690902	-2.879644	0.007207578533196035	0.027091164703840077
17191	ras_2	CG16978	-2.7100766	-22.825087	0.006818120172285922	0.025881775995334436
17193	ras_2	CG43740	-2.7158105	-3.9679205	0.0066958618253876835	0.025491507156818256
17196	ras_2	CG13707	-2.718707	-22.02804	0.006643792161044367	0.02534585990751853
17197	ras_2	Hsp70Ba	-2.7211893	-1.9318503	0.006564103474146474	0.025094020573039125
17198	ras_2	CG9498	-2.7237866	-22.853844	0.006543075884039281	0.025024060540250272
17200	ras_2	dpr7	-2.7275984	-3.0144422	0.006459929420318286	0.024737000180058543
17202	ras_2	CG42450	-2.7307856	-3.3834896	0.006399375222515773	0.024546098522818652
17208	ras_2	CG43117	-2.7442367	-2.0220788	0.006124145310748829	0.023628693534953955
17209	ras_2	Cc2d2a	-2.7459054	-2.6517832	0.006100509102822786	0.02354740051257849
17210	ras_2	CG14591	-2.7463903	-1.7973995	0.006082058633244807	0.023486063956237837
17212	ras_2	Dlip3	-2.7484035	-1.5318061	0.006043758245973739	0.023357827256448634
17217	ras_2	CG15649	-2.7543526	-22.01799	0.005965514074274188	0.023123612856555
17219	ras_2	CG8192	-2.7598507	-1.8977468	0.005834533040106104	0.022673375960598686
17227	ras_2	gnu	-2.7827523	-1.6556971	0.005445654209902006	0.021361213072189356
17228	ras_2	CG14963	-2.7841845	-3.891199	0.00544327414415893	0.021361009526372193
17229	ras_2	otp	-2.7860591	-22.66628	0.005415382491643147	0.021260647993507006
17235	ras_2	Muc68Ca	-2.799247	-1.7701199	0.005171198200674483	0.0204155522767592
17236	ras_2	Rab3	-2.7999532	-4.5973177	0.005186848555797426	0.02045973151308744
17241	ras_2	PGRP-LF	-2.806583	-2.7175333	0.0050660670243184505	0.020080305357381284
17243	ras_2	CG16799	-2.8070023	-21.143896	0.005077599624527292	0.020115274851052637
17244	ras_2	CG11786	-2.8070536	-1.7636368	0.005050073150755455	0.02004083960128949
17248	ras_2	Ugt37E1	-2.8134747	-2.1394732	0.004951517093430082	0.019717955439332035
17260	ras_2	CG8925	-2.8375628	-3.9688196	0.004613589593977636	0.01851692236428032
17270	ras_2	Peritrophin-A	-2.856899	-1.6047938	0.004324742555606487	0.017503093492584703
17279	ras_2	dnr1	-2.879123	-1.732658	0.0040315390874044775	0.016454346586715338
17286	ras_2	Gr93b	-2.890247	-21.270567	0.003915413382850987	0.0160949452453664
17288	ras_2	cpx	-2.8911514	-1.5533175	0.0038793479255109357	0.015982495382381157
17293	ras_2	Cpr65Av	-2.9010303	-2.48932	0.0037715559262172767	0.01562258493139662
17298	ras_2	CG5509	-2.9065301	-3.9081664	0.0037133583675750485	0.015444271542384891
17312	ras_2	Scgbeta	-2.9224803	-22.477146	0.0035345765288116214	0.014828413192431014
17313	ras_2	Cpr49Ae	-2.9244022	-1.8595709	0.003491778022825337	0.014655564208335988
17318	ras_2	CG13744	-2.9343708	-2.5682628	0.003391957630586252	0.0142954576300546
17321	ras_2	Pu	-2.936387	-1.5902313	0.0033614897570790675	0.01419619031419523
17323	ras_2	CG9184	-2.9378707	-4.3508887	0.0033622148831331045	0.01419619031419523
17324	ras_2	gammaTub37C	-2.9394925	-2.5398483	0.003336076097819236	0.014111801843011291
17327	ras_2	eEF1alpha2	-2.94523	-1.5717883	0.003265194356934832	0.013847803745779366
17328	ras_2	CG11638	-2.9523451	-2.1918533	0.003195411714036212	0.013594875223856176
17332	ras_2	ICA69	-2.9598808	-1.9251975	0.0031175255398386372	0.013328656490223436
17336	ras_2	CG6118	-2.961967	-1.8660849	0.0030958057162131557	0.013260512346524604
17343	ras_2	CG30172	-2.984743	-2.8477862	0.002880566483809456	0.012437269406565532
17353	ras_2	CG15201	-3.0064273	-22.836119	0.0026957511699715487	0.011755473851943421
17354	ras_2	CG9875	-3.008602	-22.181911	0.002676670769940608	0.011677819455161711
17358	ras_2	dpr21	-3.0142334	-2.2881656	0.002616592781194346	0.011453835289817808
17369	ras_2	Rbp6	-3.0285587	-1.705309	0.002488243811963337	0.010981066365927666
17371	ras_2	CG18636	-3.029312	-22.39704	0.0025010566295323423	0.011027003640537839
17372	ras_2	CG3091	-3.035869	-1.7439815	0.002430741320292666	0.010747976681294076
17373	ras_2	CG15418	-3.0370967	-5.4504733	0.0024373197994739734	0.010766687125745645
17375	ras_2	Myo81F	-3.03936	-22.84338	0.002419711941683264	0.010709530663262879
17382	ras_2	CG6071	-3.0542605	-1.7549934	0.0022875721919475506	0.0101935283443996
17384	ras_2	CG12605	-3.0550334	-4.0542517	0.002295750280227077	0.01022004309611035
17387	ras_2	kat-60L1	-3.0677648	-2.2504776	0.0021900569398861443	0.009797061152342941
17388	ras_2	CG43085	-3.068254	-1.8134354	0.002182448100604798	0.009767786011243425
17395	ras_2	Ccp84Ac	-3.0827582	-22.89478	0.002095489696410509	0.009419950007136904
17399	ras_2	CG7781	-3.0842865	-22.562714	0.002084835384678795	0.009395071048343783
17403	ras_2	CG15322	-3.0904248	-2.885653	0.002033561585885443	0.0092229004204147
17405	ras_2	CG17270	-3.0969758	-1.5308542	0.00198192515465609	0.009015450319271008
17419	ras_2	CG6908	-3.1331859	-1.5038496	0.0017540453964104473	0.00809118477228047
17420	ras_2	CG34021	-3.1332824	-4.3050747	0.0017663508764028536	0.008135677354917763
17432	ras_2	cona	-3.1618457	-3.3180828	0.0015996478990356264	0.007480514512564665
17437	ras_2	Gpb5	-3.170343	-22.712744	0.001559299886532885	0.007309701809651139
17444	ras_2	fne	-3.1954293	-2.9438624	0.0014274963595537686	0.006740750951572737
17445	ras_2	CG15531	-3.1977737	-1.8123875	0.001407322019950923	0.006655762645901916
17453	ras_2	CG13731	-3.2206736	-2.1074865	0.0012996238553824118	0.00620341852062945
17454	ras_2	CG33679	-3.2215786	-3.2330434	0.0013029301057458822	0.006209439766939959
17462	ras_2	Cyp4d2	-3.2491515	-1.5599632	0.0011769473170255061	0.005680426950925312
17466	ras_2	amn	-3.2559083	-22.415535	0.0011603934697555667	0.005612340582502543
17468	ras_2	Eh	-3.261356	-22.686857	0.0011385096412176424	0.005523969306278091
17470	ras_2	CG3635	-3.2651815	-1.9597565	0.0011130253368236407	0.005414638104643109
17472	ras_2	Prx2540-2	-3.2702954	-2.4763656	0.001097479746828094	0.005346016844271374
17476	ras_2	CG40006	-3.2839777	-1.8357828	0.0010413315542607592	0.0051037484029607194
17481	ras_2	Ccp84Ab	-3.310097	-23.94353	0.0009590447169390039	0.004730771654793205
17484	ras_2	m	-3.3220315	-2.9224324	0.0009137487438435168	0.004531699851223927
17487	ras_2	CG34330	-3.3270857	-5.2984977	0.0009027286044143965	0.004486746991062886
17499	ras_2	CG34454	-3.3799121	-22.732487	0.0007472926480938346	0.003788071848762946
17500	ras_2	Amt	-3.3810816	-22.771973	0.0007441481759971515	0.003774217531660511
17505	ras_2	Ir40a	-3.3967195	-1.6027851	0.0006950373766237227	0.003546700740001477
17509	ras_2	CG43319	-3.4196606	-1.7804656	0.0006404097328281719	0.003291741904032761
17510	ras_2	Sh	-3.420606	-2.4570963	0.0006396169998847292	0.003289510075079815
17516	ras_2	CG30099	-3.4354017	-1.5239893	0.0006042421711715114	0.003128624108633531
17518	ras_2	CG1468	-3.4408534	-2.8938613	0.0005955740208751992	0.003090719254259023
17523	ras_2	CG15211	-3.4500105	-2.8040516	0.0005749121497875282	0.0029917264292803787
17538	ras_2	pyd3	-3.4895964	-2.6298041	0.000495677431717165	0.0026272908353581676
17542	ras_2	Ir68a	-3.49224	-1.8824995	0.0004900816867083241	0.002608178350086353
17548	ras_2	CG1271	-3.5017269	-1.725385	0.0004728375673196195	0.0025296120584008797
17551	ras_2	CG8539	-3.5063	-1.6916313	0.00046424674321263675	0.002489458719448242
17552	ras_2	ltl	-3.5090394	-1.524786	0.00045949722429806044	0.002465431013412108
17563	ras_2	Cow	-3.5401316	-2.9025848	0.00041194098271240463	0.002239074950465825
17565	ras_2	Slc45-1	-3.5443165	-23.962002	0.0004080508855406932	0.0022218794509411633
17576	ras_2	CG9522	-3.570635	-23.476702	0.00036953220192833316	0.002031430768539519
17577	ras_2	CG32700	-3.5715585	-2.6350768	0.0003649527295549664	0.002009868723689566
17578	ras_2	CG10562	-3.574562	-2.6107626	0.00035968212844586083	0.0019832232743333972
17583	ras_2	Uros2	-3.5894783	-3.1520789	0.00034238091824681044	0.0018969474184266219
17584	ras_2	Eip93F	-3.5897868	-2.4422734	0.0003397369954316076	0.0018834362133444108
17592	ras_2	qjt	-3.5963151	-2.056099	0.00033059039637322213	0.0018449920235549349
17594	ras_2	Cyp6a9	-3.603782	-1.9545418	0.00032111101168724856	0.0017975092906309237
17595	ras_2	CG8563	-3.604859	-2.382444	0.0003212986633934294	0.0017975092906309237
17597	ras_2	dnd	-3.6109924	-3.6740654	0.00031632484736508044	0.001772926374205628
17602	ras_2	CG43999	-3.6323562	-2.1883287	0.00028882509656482085	0.001629748007984152
17620	ras_2	CG7607	-3.6876633	-2.0025697	0.00023293669130629478	0.0013407742426193566
17623	ras_2	CG14688	-3.6919453	-3.0392933	0.00023119273486575916	0.0013332453440561536
17628	ras_2	Gs1	-3.7123263	-3.1075544	0.00021289203774323265	0.0012401806008216884
17640	ras_2	nAChRalpha6	-3.7624044	-2.2039266	0.00017386673089863573	0.0010278526133988292
17643	ras_2	CG31140	-3.7732072	-2.9247804	0.000166757759424513	0.0009909342245595252
17645	ras_2	CG2157	-3.7853336	-2.086172	0.0001583759495349025	0.0009441841046021639
17655	ras_2	CG9864	-3.816451	-1.9692968	0.00013969082539488868	0.0008426451827732436
17656	ras_2	Cyp4aa1	-3.8171709	-3.5204246	0.00014107199297091173	0.0008504175660368693
17663	ras_2	Acox57D-d	-3.8484263	-2.6544936	0.00012353893262717207	0.0007531360178433912
17671	ras_2	CG11155	-3.8826334	-1.5979351	0.00010668679900049317	0.0006604935093316632
17694	ras_2	CG14196	-3.9571555	-5.213547	8.002241263618968e-05	0.0005135273363715615
17701	ras_2	CG12519	-3.9849436	-1.743203	7.001005301444761e-05	0.00045459464713910603
17702	ras_2	CG4269	-3.991563	-1.8849288	6.826664229024234e-05	0.00044421733547019395
17712	ras_2	CG5955	-4.0323143	-1.999557	5.743988861885987e-05	0.00037914458854535204
17721	ras_2	Karl	-4.0665545	-5.215	5.059899073407109e-05	0.00033886550363876073
17726	ras_2	CG31041	-4.075216	-2.457036	4.7822130877738745e-05	0.00032214981703616223
17740	ras_2	CG14565	-4.1411915	-3.7994368	3.6727660716672796e-05	0.0002547061882656636
17744	ras_2	CG33136	-4.1469297	-1.5384244	3.5078884403091165e-05	0.00024493817686328876
17750	ras_2	Edg91	-4.195359	-2.8681087	2.8794771061863534e-05	0.00020353776925469792
17754	ras_2	CG10211	-4.2046413	-1.5216604	2.729715856950259e-05	0.00019429901464327874
17758	ras_2	CG12071	-4.229686	-1.5890759	2.4457560859071306e-05	0.0001755853841017052
17760	ras_2	CG31706	-4.2349596	-2.406225	2.390285152566438e-05	0.00017200679431213385
17763	ras_2	CCAP-R	-4.250067	-4.171304	2.2807625356343817e-05	0.0001649014678049287
17766	ras_2	scpr-C	-4.270734	-2.7115383	2.0576135946059695e-05	0.0001497113777201409
17775	ras_2	CG1143	-4.319075	-3.090215	1.664772373129387e-05	0.0001230804715830953
17776	ras_2	CG9411	-4.323034	-1.5882916	1.612667931130146e-05	0.00011980751634104526
17780	ras_2	CG33514	-4.3424015	-1.640541	1.4799956041438665e-05	0.00011066796795452302
17781	ras_2	CG43340	-4.346604	-1.9257812	1.4549733513462322e-05	0.00010888564843883915
17783	ras_2	GstE2	-4.349536	-1.7846047	1.4313514002932065e-05	0.000107380614044891
17788	ras_2	l(2)k05911	-4.3926353	-1.7341428	1.1775624377184385e-05	8.966087440719232e-05
17790	ras_2	slbo	-4.400054	-2.688778	1.1493207438520381e-05	8.780198022350083e-05
17795	ras_2	CG34225	-4.420081	-3.627663	1.06244020007649e-05	8.184625386819307e-05
17800	ras_2	CG14810	-4.453266	-1.938484	8.938128557755532e-06	6.97934719297081e-05
17806	ras_2	CG44006	-4.5206294	-3.536853	6.68711799427991e-06	5.298299447108651e-05
17820	ras_2	Spat	-4.594309	-4.437738	4.76205379654437e-06	3.890636116054727e-05
17822	ras_2	CG7737	-4.606653	-2.4486148	4.401369873528725e-06	3.61203654647818e-05
17824	ras_2	Epac	-4.614075	-2.3186793	4.2364444752327505e-06	3.479801079701029e-05
17832	ras_2	CAH2	-4.6412644	-4.381508	3.8090284545950423e-06	3.162700096914888e-05
17840	ras_2	CG10311	-4.693168	-1.5977167	2.8697303720077147e-06	2.444602708076775e-05
17851	ras_2	CG10163	-4.7509484	-1.5087824	2.167227042518415e-06	1.874110095674501e-05
17859	ras_2	dimm	-4.8123136	-4.392153	1.6609353959316164e-06	1.4624839018879637e-05
17863	ras_2	CG34034	-4.8342395	-1.8999277	1.446412721849576e-06	1.289498414953556e-05
17871	ras_2	CG14304	-4.879186	-2.8609524	1.1667521002748688e-06	1.0567572082943654e-05
17875	ras_2	CG8870	-4.9544644	-1.8623568	7.903580907326931e-07	7.266067617707875e-06
17876	ras_2	CG1537	-4.95987	-1.5568441	7.634947404995864e-07	7.026142672100006e-06
17880	ras_2	nrv3	-4.980301	-3.0593612	7.115567269075875e-07	6.574554853350569e-06
17881	ras_2	CG3842	-4.980906	-2.8662434	6.951297461973451e-07	6.43573705485433e-06
17883	ras_2	CG9686	-4.987444	-2.9036386	6.71168360845011e-07	6.228677399243502e-06
17884	ras_2	CG44569	-4.9909554	-3.0358498	6.714072967685911e-07	6.228677399243502e-06
17885	ras_2	CG45061	-4.999389	-3.6674564	6.422447018173923e-07	5.976262818635471e-06
17896	ras_2	fit	-5.0833254	-2.970186	4.1561573956168244e-07	3.968027482287654e-06
17905	ras_2	APC7	-5.172829	-2.8376045	2.6254545650089776e-07	2.576315041064959e-06
17915	ras_2	CG33178	-5.2357187	-2.4989178	1.860325187801778e-07	1.863371571842938e-06
17919	ras_2	CG9503	-5.2899003	-3.185684	1.3943236069315457e-07	1.4135822202869538e-06
17921	ras_2	CG15615	-5.3239307	-2.1054056	1.1324014435636849e-07	1.159574022845626e-06
17924	ras_2	CG8927	-5.346215	-3.1441119	1.0295779217399412e-07	1.0613907226925798e-06
17943	ras_2	Cyp6a22	-5.535863	-2.7525663	3.576490411384995e-08	3.8925622211693156e-07
17957	ras_2	Oatp30B	-5.717527	-1.6160011	1.2400289771903805e-08	1.4221582332152177e-07
17961	ras_2	MtnA	-5.750681	-1.5569226	1.0290664851816597e-08	1.1921319446391072e-07
17964	ras_2	CG13227	-5.762869	-2.7797825	9.949382496262803e-09	1.1555137266229268e-07
17980	ras_2	GstD6	-5.969598	-2.125147	2.814713615478979e-09	3.438747992279578e-08
17983	ras_2	TfAP-2	-5.99058	-4.575492	2.693768303054226e-09	3.3041877246687867e-08
17984	ras_2	CG33468	-5.996452	-3.079154	2.4949046613164474e-09	3.072583928534014e-08
17989	ras_2	geko	-6.0405493	-2.399158	1.909381032752841e-09	2.37701098717874e-08
17991	ras_2	CG15097	-6.049382	-1.6494355	1.7240514428734905e-09	2.1580043640333253e-08
17992	ras_2	CG32195	-6.1023965	-1.9266834	1.2593458732251245e-09	1.5959251915525575e-08
17993	ras_2	CG33494	-6.122082	-1.8336959	1.1078039264918432e-09	1.4058231017375743e-08
18000	ras_2	CG4461	-6.179382	-1.8972301	7.80454970996285e-10	1.0085456843508331e-08
18001	ras_2	fog	-6.181293	-1.7396616	7.68901173830792e-10	9.9501668122673e-09
18022	ras_2	CG7768	-6.4393754	-1.5474734	1.4963816155054526e-10	2.0739125864444908e-09
18028	ras_2	CG16820	-6.5187693	-1.7571065	8.908834397227742e-11	1.2653027181821135e-09
18030	ras_2	CG42526	-6.5361924	-2.5235388	8.280712113323504e-11	1.179744311176136e-09
18031	ras_2	CG6142	-6.5949907	-1.6830653	5.4161984756014586e-11	7.801196391466779e-10
18038	ras_2	CG12177	-6.6521587	-1.5462445	3.728769040938614e-11	5.48260512029035e-10
18039	ras_2	per	-6.6544805	-3.6211927	4.0682922659081074e-11	5.962712706023464e-10
18040	ras_2	Ance-3	-6.6686783	-1.7311951	3.3141554246486904e-11	4.896517877802212e-10
18042	ras_2	Gr94a	-6.673956	-2.0934634	3.3281324230017295e-11	4.909262858688243e-10
18054	ras_2	CG34165	-6.7517443	-1.7185419	1.8969072648015758e-11	2.905529908940644e-10
18064	ras_2	Cerk	-6.9175224	-1.5099301	6.140098791428497e-12	9.713001105406286e-11
18070	ras_2	CG42364	-6.9430785	-1.8808659	5.213947772120187e-12	8.363281610000475e-11
18080	ras_2	COX7AL	-7.0272818	-1.5756427	2.8708748119665e-12	4.745995747710385e-11
18100	ras_2	spz	-7.2775416	-2.7793365	5.048842536922338e-13	8.89119583037667e-12
18103	ras_2	disco-r	-7.3714514	-1.9742209	2.441588912892994e-13	4.39401405473167e-12
18107	ras_2	CG11658	-7.3998294	-2.1984317	2.0061046247066506e-13	3.681201986336704e-12
18127	ras_2	CG11438	-7.6572156	-1.5488852	2.914017164360821e-14	5.928183477385928e-13
18133	ras_2	dyl	-7.749199	-2.209742	1.4785351175052855e-14	3.1113669043832555e-13
18136	ras_2	CG34265	-7.8201194	-2.9786673	9.765531683453782e-15	2.0740452128631583e-13
18143	ras_2	CG1941	-7.912697	-2.782717	4.552369737730597e-15	1.00645764683562e-13
18150	ras_2	CG34115	-8.028047	-3.2123356	1.9665475810972527e-15	4.481808086203127e-14
18154	ras_2	CG9518	-8.103058	-3.6838617	1.005832217380812e-15	2.366284767812551e-14
18160	ras_2	CG8620	-8.169046	-2.2771208	5.627862662051408e-16	1.3517183226262219e-14
18183	ras_2	CG14960	-8.546239	-3.7103362	3.234690717740944e-17	8.652561905327453e-16
18197	ras_2	CG1124	-8.947608	-1.5685658	7.948932158496724e-19	2.4229718456547323e-17
18199	ras_2	CG7365	-9.006122	-2.539865	5.179960960529179e-19	1.6002067950456302e-17
18200	ras_2	CG33926	-9.013796	-1.971271	4.975237526653655e-19	1.5421555509137598e-17
18226	ras_2	Tsp42Ed	-9.640393	-1.6756151	1.536376178023594e-21	5.998404865262329e-20
18227	ras_2	reb	-9.644674	-1.5335721	1.4911150341064396e-21	5.871665424002825e-20
18236	ras_2	Ugt37C2	-9.84713	-1.7078136	2.197870206459156e-22	9.207972211992126e-21
18238	ras_2	CG13226	-9.897519	-1.9402446	1.441970452871216e-22	6.096810555342585e-21
18241	ras_2	CG12699	-9.993675	-2.9403758	6.913586797875369e-23	2.9780356277233106e-21
18249	ras_2	CG34194	-10.237542	-1.8438805	5.252049991033638e-24	2.5229088307713945e-22
18252	ras_2	disco	-10.31833	-2.1685266	2.3743262879678027e-24	1.1839371571795972e-22
18254	ras_2	Wwox	-10.380919	-1.5041387	1.2370483239033146e-24	6.412383260911249e-23
18255	ras_2	Mocs1	-10.383723	-1.5552332	1.2079219629406155e-24	6.296979551125085e-23
18257	ras_2	PolZ2	-10.546048	-1.5805037	2.336398970949581e-25	1.2836203927222998e-23
18258	ras_2	GstD5	-10.550192	-3.1355157	3.023488249901174e-25	1.631794393696663e-23
18261	ras_2	CG13116	-10.8465395	-2.4657717	1.1766050675110369e-26	6.789529241769663e-25
18262	ras_2	CG31288	-10.849123	-2.328492	1.1550701883215357e-26	6.707448720158285e-25
18269	ras_2	CG31469	-11.085529	-2.1644435	9.608863094592432e-28	6.03844649951271e-26
18271	ras_2	CG9521	-11.1508045	-3.4328601	6.057782579068544e-28	3.8597329974273534e-26
18273	ras_2	Ugt37D1	-11.347798	-1.8808596	5.483310758902776e-29	3.75443106066664e-27
18274	ras_2	DOR	-11.376771	-1.8112538	4.0392769297271143e-29	2.8290355595607845e-27
18275	ras_2	CG12224	-11.390779	-1.9356498	3.579496053918683e-29	2.5458818833103814e-27
18280	ras_2	AOX1	-11.771524	-2.3916137	5.879390398771338e-31	4.571475161756527e-29
18283	ras_2	Cyp6a20	-12.165188	-1.8754629	6.439240353915645e-33	5.4703731710348185e-31
18285	ras_2	GstE9	-12.2369	-1.9723991	3.232020615121223e-33	2.7975272777110584e-31
18286	ras_2	CG2065	-12.260851	-1.539108	2.1060262595745072e-33	1.8579606664996252e-31
18295	ras_2	CHKov2	-12.892804	-1.6690089	1.2602870947727329e-36	1.344550476109282e-34
18307	ras_2	CG13659	-13.418039	-2.0453336	2.2956826127856506e-39	3.3433155511600548e-37
18309	ras_2	Ero1L	-13.424801	-1.5246724	1.9268859244952885e-39	2.851480380200689e-37
18314	ras_2	Lim1	-13.649182	-2.4556127	1.686173252650956e-40	2.812843562376822e-38
18317	ras_2	CG15282	-13.881266	-1.8378264	6.1556053670272e-42	1.1074054753426385e-39
18318	ras_2	CG32549	-13.926389	-2.395497	3.6284004390496404e-42	6.793994699649072e-40
18320	ras_2	ich	-13.957608	-2.4188254	2.4575471765299356e-42	4.797445818013225e-40
18327	ras_2	CG31279	-14.464613	-3.1182816	7.552621142958514e-45	1.823560499648536e-42
18328	ras_2	CG2909	-14.511084	-1.6084532	1.766676928894958e-45	4.631217377888926e-43
18330	ras_2	CG1299	-14.756098	-1.5498748	7.771123206097758e-47	2.2281267317483417e-44
18331	ras_2	CG14401	-14.874625	-2.9796238	4.115091679336061e-47	1.2179343921905923e-44
18332	ras_2	CG11893	-14.997257	-1.553289	4.206001529068206e-48	1.2863354676400263e-45
18335	ras_2	CG13117	-16.092863	-1.8972216	5.766073388681068e-55	2.519224921007086e-52
18336	ras_2	glob1	-16.16657	-2.8085725	8.545953914444021e-55	3.564051234773814e-52
18338	ras_2	Arc2	-16.789482	-1.7159213	2.563809051348103e-59	1.4701842528824279e-56
18339	ras_2	Arc1	-16.80184	-2.1516721	2.2391341294694506e-59	1.3696037091921472e-56
18341	ras_2	CG15784	-16.927021	-1.795356	5.853680387427412e-60	3.8362512539033215e-57
18342	ras_2	agt	-16.955626	-1.5345716	2.1616670808287058e-60	1.5256381128156442e-57
18344	ras_2	y	-17.88661	-2.1756167	1.3233231966013384e-66	1.3490544809796977e-63
18345	ras_2	CG3397	-18.252577	-2.6659386	8.606793336889018e-69	1.3161221477659457e-65
18347	ras_2	GstD9	-21.209324	-1.6190124	1.4752014979911078e-89	3.3837434360171035e-86
18348	ras_2	CG18547	-21.74731	-2.1151104	1.7633389929242338e-94	5.392878420026615e-91
18349	ras_2	CHKov1	-24.672308	-2.2818177	8.79220152616274e-118	8.066844900254314e-114
18352	ras_3	CG15522	2.4046822	2.1592622	0.017110894113601692	0.02600935279859104
20988	ras_3	CG4607	-2.1034002	-19.796345	0.03556471389648142	0.04999329707372714
20989	ras_3	kmg	-2.1041458	-20.522572	0.03549956754842563	0.04992466772789778
20995	ras_3	CG32052	-2.1062846	-21.388378	0.035313219310791004	0.04967782692065432
20998	ras_3	CG14949	-2.1078234	-19.94395	0.03517968503311854	0.04950515493540838
21001	ras_3	Cpr47Ea	-2.1100347	-20.414242	0.03498853881172794	0.04925883744017245
21004	ras_3	Faa	-2.1119967	-20.381044	0.0348196845723986	0.04903616361500493
21006	ras_3	CG11353	-2.1145942	-21.355347	0.03459718769964411	0.048745269831731365
21007	ras_3	fkh	-2.11463	-20.448618	0.03459413947152712	0.048745269831731365
21008	ras_3	Agpat1	-2.1147907	-20.35291	0.034580400522492435	0.048736585989841485
21012	ras_3	dsx-c73A	-2.1161857	-20.50391	0.034461485211940715	0.04857645211546413
21013	ras_3	Sdic1	-2.1163712	-20.726479	0.034445681614642065	0.04857645211546413
21014	ras_3	Liprin-gamma	-2.1166413	-22.125347	0.0344226985533368	0.04855161556139356
21017	ras_3	Agpat2	-2.1194658	-20.69752	0.034183196858505786	0.04824347503103993
21019	ras_3	CG34437	-2.1217432	-20.685932	0.03399111452374417	0.048016701424996575
21021	ras_3	beat-Ib	-2.1224093	-20.580265	0.03393512372633498	0.047952373354246645
21023	ras_3	CG5087	-2.1227639	-1.7241997	0.034762214196445346	0.048962744128398225
21024	ras_3	CG43168	-2.1234412	-20.400421	0.033848508705549674	0.047852090504378775
21025	ras_3	CG16756	-2.1247482	-20.593983	0.033739102663037326	0.04771212498972988
21027	ras_3	CG10514	-2.1255693	-20.675335	0.03367050733680422	0.04762246104750712
21028	ras_3	CG1360	-2.1277514	-1.7065043	0.03445952708528324	0.04857645211546413
21033	ras_3	CG4847	-2.1309645	-19.986732	0.03322281614500358	0.04706797388550922
21041	ras_3	CNMa	-2.1350105	-20.755041	0.032890436543357875	0.04665580632116705
21045	ras_3	CG43886	-2.1376767	-19.632006	0.03267294538777228	0.046368797205384484
21047	ras_3	CG3546	-2.1387298	-21.023867	0.03258739260003359	0.046254536990301395
21050	ras_3	ase	-2.139497	-21.75555	0.03252517654593942	0.046173370696115455
21054	ras_3	Nos	-2.1410346	-1.8049212	0.032992816417803356	0.04679379975782127
21055	ras_3	CG33521	-2.1420557	-21.757294	0.03231844614780942	0.04589409432071683
21059	ras_3	CG31125	-2.1430213	-1.7427313	0.03305260907046433	0.046864115008732846
21060	ras_3	Scp1	-2.1431413	-19.621674	0.03223106920725898	0.045784186402941816
21061	ras_3	Lrp4	-2.1438084	-21.1083	0.03217749608428708	0.045727244378700446
21063	ras_3	CG31875	-2.1440024	-19.73382	0.03216190969581013	0.04571425584183702
21068	ras_3	CG43222	-2.1461287	-20.680138	0.03199169175612003	0.045507561529054455
21069	ras_3	CG5849	-2.1474764	-21.568087	0.031884174322701096	0.04536165287808692
21070	ras_3	CG30324	-2.148371	-21.074823	0.03181300089216927	0.045267413645417656
21072	ras_3	CG1208	-2.1489558	-20.329638	0.03176653365539642	0.04521531900221255
21074	ras_3	Kaz-m1	-2.1499991	-21.47772	0.031683788215635465	0.04511153893210046
21075	ras_3	CG15676	-2.1506145	-20.418493	0.031635074165181284	0.04505616353081935
21076	ras_3	veil	-2.1511965	-20.474504	0.03158907506115679	0.04499763448006731
21077	ras_3	c-cup	-2.1519086	-20.308735	0.0315328470484594	0.04492451423441226
21078	ras_3	CG5071	-2.1540563	-21.27263	0.031363784852288856	0.04472532266393383
21087	ras_3	Agpat4	-2.1584418	-19.665005	0.031021014711584634	0.04427781735824347
21088	ras_3	CG7384	-2.1585763	-20.278625	0.03101055839900854	0.04426977957225818
21090	ras_3	CG16779	-2.1602407	-20.500116	0.030881342019651523	0.04409217445227244
21091	ras_3	CG43901	-2.1608458	-20.503613	0.030834486183854034	0.044032126184725406
21094	ras_3	Acer	-2.163294	-20.515863	0.03064551184564697	0.043800751819361536
21095	ras_3	prim	-2.1639366	-20.60439	0.030596071589819394	0.04374579124999592
21096	ras_3	ATPsynbetaL	-2.1646373	-20.632519	0.03054225552623569	0.04367599664171017
21097	ras_3	CG17107	-2.1647916	-19.428642	0.030530411085850136	0.04366586464733827
21098	ras_3	CG17350	-2.1652336	-20.256104	0.030496504447766436	0.04362417030063253
21100	ras_3	Patsas	-2.1659496	-20.752039	0.0304416610283481	0.043559301299921055
21110	ras_3	CG44815	-2.1710386	-20.040066	0.030054259091368166	0.043031808233973616
21111	ras_3	CG11835	-2.1710837	-21.609177	0.030050859502663476	0.043031808233973616
21112	ras_3	stumps	-2.1716776	-19.538177	0.030005925992192404	0.04297601794854282
21113	ras_3	Col4a1	-2.1723726	-19.545172	0.02995341878692441	0.042920914785261825
21114	ras_3	side-VI	-2.1726568	-20.899828	0.02993198215506178	0.04290359885528696
21119	ras_3	gom	-2.1766255	-20.359646	0.02963387196990797	0.04250950208316223
21120	ras_3	Oli	-2.1767538	-21.337719	0.029624275476983125	0.042502381157360464
21124	ras_3	dpr13	-2.1779566	-20.281675	0.029534455066469442	0.042393401945378155
21125	ras_3	CG13358	-2.1780312	-20.067644	0.029528883205837544	0.04239203620928798
21126	ras_3	CG32801	-2.1783094	-19.920105	0.029508142055585367	0.04236888941470982
21128	ras_3	Ance-5	-2.1795812	-21.487276	0.02941350790952621	0.042252847200548456
21130	ras_3	CG15772	-2.1810877	-20.65483	0.029301739096670762	0.04209888133604044
21132	ras_3	Lcch3	-2.1812294	-20.795374	0.029291249597322086	0.04209040173146909
21133	ras_3	CG5080	-2.1826217	-22.109468	0.029188307722887403	0.04196219419578376
21134	ras_3	CG13038	-2.1830585	-20.032427	0.029156077995388868	0.0419289993115506
21140	ras_3	CG33641	-2.1878881	-20.91075	0.02880173694078351	0.0414584148778928
21142	ras_3	CG15478	-2.1889138	-21.114977	0.02872696329074775	0.041363761486599274
21144	ras_3	RyR	-2.1905522	-20.408436	0.02860788474213999	0.04120523430284684
21150	ras_3	CG33543	-2.193097	-20.279604	0.028423746807712116	0.04097217234261723
21151	ras_3	CG7387	-2.1941478	-20.507595	0.028348011059449715	0.04086942197838641
21153	ras_3	Mst36Fb	-2.194889	-19.90687	0.02829469906513812	0.04079897279940944
21154	ras_3	CG31102	-2.1954079	-21.517775	0.028257431807078046	0.040751640495118056
21158	ras_3	CG9368	-2.1972694	-20.558744	0.02812405690697724	0.04056566925350042
21159	ras_3	CG7135	-2.1973016	-21.33276	0.028121768303668134	0.04056566925350042
21160	ras_3	cep290	-2.197464	-21.108385	0.02811015709542198	0.040558372597970856
21165	ras_3	soti	-2.2020535	-20.368061	0.02778380237743433	0.04011904104705067
21167	ras_3	DEF8	-2.2037263	-1.7406886	0.028563447124718932	0.041154150026585457
21169	ras_3	Or47a	-2.204008	-21.975801	0.027645815328511104	0.03993864834499911
21170	ras_3	CG17751	-2.2052867	-20.389362	0.027555861775140234	0.03982750973328791
21171	ras_3	GILT3	-2.2055447	-21.171255	0.027537751494642576	0.03980760516202074
21173	ras_3	Vsx2	-2.2063394	-21.775324	0.027482004400288952	0.039739541429889856
21175	ras_3	CG43322	-2.206706	-19.684683	0.027456317064085866	0.039708655274745874
21176	ras_3	CG10175	-2.2068372	-20.417915	0.027447122618906222	0.03970161595908318
21177	ras_3	CG14274	-2.2083032	-19.69947	0.027344650912017335	0.03955962978835684
21178	ras_3	CG13218	-2.2105246	-21.597525	0.027190017674688243	0.03934832999452124
21181	ras_3	Vha68-3	-2.2117763	-20.509928	0.027103223349106337	0.03924129307685824
21182	ras_3	CG6282	-2.2121615	-20.004421	0.027076558312473728	0.03921506274932067
21185	ras_3	hbn	-2.2135355	-21.378187	0.02698161821509692	0.03909607503529915
21186	ras_3	Mco4	-2.2141259	-20.813644	0.026940921064562924	0.03904943929974168
21187	ras_3	CG11398	-2.2148786	-1.7506444	0.027760023381194425	0.04009101440617958
21190	ras_3	Hs3st-B	-2.2162106	-20.430653	0.02679763100392945	0.03885402409308671
21191	ras_3	slo	-2.2162488	-21.404305	0.026795015478286218	0.03885402409308671
21192	ras_3	RhoGAP102A	-2.216398	-20.785011	0.026784781760950845	0.038847671934354094
21193	ras_3	Dop1R1	-2.2165492	-20.239721	0.026774424056572474	0.038838789046490504
21194	ras_3	CG7024	-2.21835	-20.7905	0.026651277649866554	0.03866626698885605
21197	ras_3	CG14024	-2.2196856	-20.55678	0.02656024855549517	0.038540294242712034
21198	ras_3	CG14342	-2.2207067	-20.701477	0.026490840461315737	0.038445659796357466
21199	ras_3	jb	-2.2210066	-21.627659	0.02647048114774369	0.03842219024371909
21200	ras_3	Pkc53E	-2.2227774	-20.32274	0.026350558304894602	0.03826628243865274
21205	ras_3	CG15528	-2.2255614	-21.105085	0.02616298193870964	0.038011933378885344
21206	ras_3	Drep3	-2.2258906	-20.5087	0.026140868679913342	0.03798582042100173
21210	ras_3	tey	-2.2288353	-21.063557	0.025943865927678358	0.03771747264877973
21212	ras_3	CCAP	-2.2300735	-20.75112	0.025861419717860407	0.037603569875018894
21213	ras_3	tbrd-1	-2.2317781	-19.730043	0.02574826825122237	0.037444977207951376
21214	ras_3	CG5681	-2.231959	-21.958992	0.02573628579628231	0.03743348480990649
21215	ras_3	CG13749	-2.234924	-20.1155	0.02554059078417822	0.03716652187864158
21220	ras_3	CG31559	-2.2374926	-19.967644	0.02537211197644227	0.03695065514029489
21221	ras_3	Cluap1	-2.2395692	-21.012798	0.02523658727867502	0.036770793756049434
21222	ras_3	CG5050	-2.239967	-21.55689	0.025210701206924303	0.03673891098690128
21223	ras_3	CG4133	-2.2400246	-21.418543	0.02520696035899561	0.03673891098690128
21225	ras_3	Uro	-2.2409265	-22.157082	0.02514835376105709	0.03665969903999028
21227	ras_3	CG32683	-2.2424586	-20.897549	0.025049084830063302	0.036532403960551706
21229	ras_3	Atg5	-2.2469454	-1.5325077	0.02563733032186076	0.037301380542827854
21230	ras_3	CG15196	-2.24735	-21.419586	0.024734398348867894	0.03612528898695076
21231	ras_3	shd	-2.2476072	-21.335007	0.024717935217451442	0.03611258847454092
21232	ras_3	CG10116	-2.2485263	-20.77732	0.02465922834322387	0.03603255614732904
21233	ras_3	SP1029	-2.2485485	-21.292864	0.02465781839804161	0.03603255614732904
21234	ras_3	Kaz1-ORFB	-2.2487001	-22.596682	0.02464813515102149	0.03603255614732904
21236	ras_3	Or2a	-2.2494984	-20.564564	0.024597263296512812	0.035982125437739966
21237	ras_3	CG11883	-2.249792	-1.7753575	0.025380448203908976	0.03695692941927708
21241	ras_3	CG15625	-2.252136	-20.866077	0.024429821545598685	0.03576180481479417
21242	ras_3	beat-VI	-2.2523403	-21.045403	0.024416887288894445	0.03576180481479417
21243	ras_3	CG7408	-2.2526698	-21.754103	0.024396051703011602	0.03573906664140691
21245	ras_3	NimB1	-2.253088	-19.889383	0.024369623551206112	0.03570605175380327
21246	ras_3	CG17321	-2.2533681	-21.927328	0.024351926357876204	0.035685820848668615
21247	ras_3	CG5890	-2.2536774	-21.429775	0.024332410141724395	0.03566861528204527
21248	ras_3	CG6218	-2.2542791	-1.8038944	0.024978051934594205	0.036440392192701836
21251	ras_3	CG15435	-2.256666	-1.7881382	0.02489393316465189	0.03634078548698187
21252	ras_3	CG7368	-2.2571309	-20.904987	0.024115420402646474	0.035373138640172885
21259	ras_3	CG5282	-2.260596	-21.21831	0.02389937396704462	0.035061841405122224
21261	ras_3	CG15356	-2.2613575	-1.7809472	0.024634165520013823	0.036024620440887285
21262	ras_3	CG10713	-2.2613919	-20.82382	0.023849990358273326	0.03500541145900499
21263	ras_3	sc	-2.2616262	-1.8853395	0.024309415890219524	0.035646298672329255
21264	ras_3	CG32483	-2.2617097	-22.301722	0.023830292631902908	0.03498286958363347
21268	ras_3	CG9717	-2.2632017	-20.090796	0.023738029889994638	0.034853004359209606
21269	ras_3	BORCS6	-2.263436	-1.5342143	0.02454967530154668	0.03592396664939247
21271	ras_3	CG43116	-2.2655623	-21.453987	0.02359266980548078	0.034645125714674485
21272	ras_3	l(3)76BDm	-2.2658556	-1.7891335	0.024339821661875906	0.0356737801513916
21274	ras_3	b6	-2.2659078	-1.7952864	0.02431341648037718	0.035646467914263444
21278	ras_3	CG14642	-2.2678916	-21.037224	0.02344999667950071	0.03446440328757711
21279	ras_3	CG13043	-2.2681334	-22.127028	0.023435231398972144	0.034452531338819
21280	ras_3	trh	-2.2688067	-20.230051	0.023394154023213667	0.03439765435304253
21281	ras_3	CG16736	-2.2689621	-20.603252	0.02338467239798284	0.03438922411468064
21283	ras_3	CG3829	-2.2722769	-20.227049	0.02318343589130377	0.034120632708166836
21284	ras_3	Nmdar2	-2.2735593	-22.063347	0.023105982556413024	0.03401209529200858
21285	ras_3	CG32187	-2.274182	-20.76689	0.023068442341814287	0.033962284737828315
21286	ras_3	CG15818	-2.2746212	-20.605291	0.023042011869837304	0.033934263066734714
21289	ras_3	CG13360	-2.2758708	-20.347927	0.022966931190910013	0.03383571591398377
21290	ras_3	CG33253	-2.2761023	-20.843868	0.022953053391730146	0.03382497026487698
21291	ras_3	e(y)2b	-2.2790499	-1.8021249	0.023486958952943542	0.03450093634218012
21292	ras_3	CG12974	-2.2794948	-20.96451	0.022750407103009268	0.03353172452531888
21293	ras_3	CG6414	-2.2802684	-21.202076	0.02270441820358449	0.03346931828693568
21295	ras_3	Nplp1	-2.281134	-1.8288207	0.02327765643669641	0.03424282472449728
21296	ras_3	Ugt49B1	-2.2811778	-21.100626	0.02265045834677345	0.03339513985724673
21300	ras_3	CG5399	-2.282571	-21.454277	0.022568007551566547	0.033278924668213285
21302	ras_3	RIC-3	-2.2856884	-20.441301	0.02238446146056052	0.03301888004833485
21303	ras_3	CG32755	-2.2860835	-20.918152	0.022361295173440852	0.03299001177300528
21306	ras_3	CG34141	-2.287664	-22.026009	0.022268820000146308	0.032880016656154226
21310	ras_3	CG33307	-2.2922173	-20.308702	0.02200426547213837	0.0325103278110901
21311	ras_3	ACXD	-2.2923129	-20.639458	0.021998750672656338	0.03250741462741535
21312	ras_3	CG7264	-2.2941246	-20.086391	0.021894260682465378	0.0323634351154535
21313	ras_3	Fatp2	-2.2956061	-20.64172	0.02180914471602821	0.03225320805440987
21314	ras_3	ND-51L1	-2.2978175	-20.625185	0.021682646255884817	0.03207647200866546
21317	ras_3	CG4596	-2.3010662	-20.506092	0.02149794648178139	0.03184945244152176
21321	ras_3	CG31191	-2.3029969	-20.619492	0.021388838616302534	0.031692925436785487
21322	ras_3	obst-H	-2.3040252	-22.064157	0.02133091502674307	0.031622418059519736
21324	ras_3	CG1358	-2.3046396	-20.396408	0.02129637518272391	0.031581419476562456
21326	ras_3	Cp7Fc	-2.3061688	-22.488453	0.021210621854148324	0.031467514470819066
21327	ras_3	kek2	-2.3069482	-20.988588	0.021167028715449232	0.0314149932811787
21329	ras_3	CG11322	-2.3075764	-20.50625	0.021131949731428613	0.0313680049807244
21330	ras_3	CG10654	-2.308004	-20.423357	0.02110810924397874	0.031352906315930865
21331	ras_3	CG17328	-2.308744	-1.7985106	0.021817458446558788	0.03226030318246203
21336	ras_3	beat-IIIb	-2.3133543	-21.79238	0.020811687471861167	0.030932647424967794
21342	ras_3	Muc30E	-2.3155599	-20.907785	0.020690556495721674	0.030757591679884372
21345	ras_3	CG9101	-2.3172364	-20.492603	0.02059889896683619	0.030631263860732904
21346	ras_3	CG6847	-2.3177094	-1.8324252	0.021216135642123893	0.031467514470819066
21347	ras_3	Act87E	-2.3179135	-21.045216	0.0205619742346545	0.030586270039389598
21348	ras_3	pros	-2.3179326	-1.5123821	0.020911761432546243	0.03107635425066598
21350	ras_3	Spag1	-2.318839	-21.38285	0.020511605636965642	0.030521242575277288
21353	ras_3	CG18011	-2.3201873	-20.64907	0.02043841717456928	0.03042220596636488
21354	ras_3	Obp56a	-2.320353	-20.808855	0.020429431481807217	0.0304137650244331
21356	ras_3	CG14109	-2.3213482	-20.055197	0.02037558400581472	0.030348373904764615
21361	ras_3	igl	-2.3227446	-19.77718	0.020300230805568562	0.030255785841632805
21363	ras_3	l(2)efl	-2.3240395	-22.63055	0.020230568818280923	0.030161759653514374
21364	ras_3	CG18628	-2.3246496	-20.691021	0.02019781517589467	0.030117821264234294
21365	ras_3	Tsc1	-2.3252563	-1.5623798	0.02092883945341417	0.03109669667774494
21366	ras_3	CG15347	-2.327261	-21.149729	0.020058163252559866	0.029924170380851507
21367	ras_3	CG11382	-2.3276453	-20.041245	0.02003768389558176	0.029898479385585076
21368	ras_3	insb	-2.3288372	-21.486576	0.019974284131341502	0.029813576851319062
21369	ras_3	CG43678	-2.3294635	-22.022097	0.019941031923973045	0.029768787488196013
21370	ras_3	CG42795	-2.3299043	-20.706089	0.019917666426138174	0.02973874523349353
21374	ras_3	Cpr11A	-2.332656	-21.218605	0.019772323888660345	0.029526541614332463
21375	ras_3	tok	-2.3326952	-1.8641282	0.02033128449396016	0.030297147187280243
21376	ras_3	CG2663	-2.3327672	-19.68308	0.01976645927825171	0.029522588943180765
21377	ras_3	CG4984	-2.3330069	-21.09966	0.019753849619744177	0.029508559143789127
21379	ras_3	Buffy	-2.3341575	-20.499165	0.019693408980471346	0.029432648215641732
21380	ras_3	CG18171	-2.3345375	-21.099503	0.01967347016631443	0.029407639096763586
21381	ras_3	Cyp12a5	-2.334735	-20.707594	0.019663131661390366	0.029396974579315074
21382	ras_3	CG15760	-2.335619	-20.77855	0.01961684563237942	0.029332555195091457
21383	ras_3	CG11626	-2.3361762	-20.543932	0.01958773513426069	0.029298576761793583
21385	ras_3	nAChRalpha5	-2.3365774	-21.764597	0.019566795001217257	0.02927202741499565
21387	ras_3	CG10495	-2.3368604	-1.5299777	0.020338818882866604	0.030303452947434407
21389	ras_3	repo	-2.3383744	-20.902279	0.019473231537721174	0.02915582561334722
21390	ras_3	Pex7	-2.3384044	-21.304653	0.01947167865308033	0.02915582561334722
21392	ras_3	CG15412	-2.3398044	-20.419271	0.01939906233185985	0.029054260022006877
21393	ras_3	fog	-2.3411105	-1.516566	0.020077249735761735	0.029947775374022746
21395	ras_3	CG7886	-2.3415737	-20.299223	0.019307628844468187	0.028922039942529898
21396	ras_3	CG31999	-2.3430958	-20.975494	0.01922928236593224	0.028818795443879174
21398	ras_3	CG3502	-2.3453636	-20.499458	0.019113054265923336	0.028663333260844494
21399	ras_3	Nlg4	-2.3458047	-21.647808	0.019090518683055547	0.028634217576758974
21400	ras_3	CG44836	-2.3472595	-20.907549	0.019016369828213354	0.028531008723587107
21401	ras_3	CG32694	-2.3477418	-20.402084	0.0189918392245256	0.028504846210538587
21402	ras_3	CG34031	-2.3490381	-20.694353	0.01892604389728855	0.028415390731078783
21403	ras_3	CG13458	-2.3491254	-21.420774	0.01892162929882328	0.028415390731078783
21405	ras_3	CG10738	-2.3494327	-21.1875	0.018906053629865086	0.028403969551991516
21407	ras_3	Cyp6g2	-2.3497915	-21.005165	0.01888790296562427	0.02838134780700994
21413	ras_3	CG33177	-2.3546958	-20.267948	0.01864123841133434	0.028038256135080746
21414	ras_3	CG13067	-2.3568554	-21.532917	0.01853350939538241	0.02788993746147837
21415	ras_3	Fum2	-2.3582108	-20.983469	0.01846618063171713	0.027793177049869527
21416	ras_3	Osi24	-2.3585863	-20.727758	0.01844757107140772	0.027769723475006697
21422	ras_3	CG32645	-2.3605237	-21.728231	0.018351781736281065	0.027639132867757512
21424	ras_3	CG15458	-2.362675	-20.426704	0.01824593792485331	0.027493263337252275
21426	ras_3	Sas-4	-2.3633044	-1.8268291	0.018923974786776314	0.028415390731078783
21427	ras_3	rha	-2.364216	-21.042437	0.018170447022136268	0.027393008778853145
21428	ras_3	CG18809	-2.3645568	-1.5420779	0.01891637515839064	0.02841482352295909
21430	ras_3	Obp69a	-2.3656073	-20.951889	0.018102521186204843	0.027299577890110033
21431	ras_3	CG7101	-2.3656652	-1.5408643	0.01882284302240467	0.02828822026708646
21432	ras_3	CG15312	-2.3662426	-20.999609	0.018071580616231694	0.02726636279459395
21433	ras_3	CG34331	-2.3665693	-20.453327	0.01805568655074364	0.02724686251695278
21435	ras_3	tau	-2.3674486	-21.295614	0.01801297915916089	0.02720031003708051
21436	ras_3	CG18131	-2.367557	-20.529196	0.018007715833587915	0.027196838316571048
21438	ras_3	CG1339	-2.3684125	-21.123068	0.0179662523510234	0.027143152530979694
21441	ras_3	Lime	-2.3692193	-21.123093	0.01792722451069608	0.0270975757636963
21442	ras_3	CG40198	-2.3694692	-21.621464	0.017915156716990524	0.027083796816343392
21444	ras_3	CG12826	-2.372113	-20.839766	0.01778786243783746	0.026922408094219513
21445	ras_3	ninaA	-2.3724735	-20.353907	0.017770567723201472	0.026904117565845313
21447	ras_3	Poc1	-2.3743956	-1.5131731	0.01839724168042537	0.027698505483738558
21448	ras_3	CG13924	-2.374878	-20.985886	0.017655597854676186	0.02674669223361612
21450	ras_3	Gat	-2.3764853	-21.012358	0.017579097391662978	0.02664295612214494
21455	ras_3	tnc	-2.3796706	-1.849617	0.018080818166382476	0.02727581497477133
21456	ras_3	Obp56d	-2.3798046	-22.913483	0.01742204429969597	0.026438514133263404
21458	ras_3	stum	-2.3815947	-21.259007	0.01733786691143867	0.026319478642033392
21459	ras_3	f	-2.3817968	-20.470238	0.01732837691298107	0.02630942548015908
21466	ras_3	Nlg2	-2.385473	-21.301054	0.017156699031360256	0.026070340114728446
21471	ras_3	CG3699	-2.3863418	-21.707897	0.017116336771723552	0.02601331619687984
21476	ras_3	CG8927	-2.388455	-1.914437	0.017485417307513667	0.026530296642374385
21480	ras_3	CG2233	-2.3911374	-20.541372	0.016895084126475397	0.025715394303319802
21487	ras_3	ana	-2.3944197	-20.625177	0.016745098970379638	0.02550628265390702
21489	ras_3	CG14630	-2.3961532	-21.398878	0.016666356006195458	0.02540096617223311
21491	ras_3	CG11670	-2.3978167	-21.484447	0.01659110844439188	0.02529888980842538
21492	ras_3	CG13250	-2.3982613	-20.9515	0.016571041031104225	0.02527793053275805
21493	ras_3	CG32100	-2.4003122	-1.5736424	0.017184326611295625	0.02610799745961871
21495	ras_3	CG42266	-2.4008174	-20.686869	0.016456113871837392	0.025130633284638493
21497	ras_3	CG32074	-2.4012692	-20.93274	0.01643587130644718	0.025103898657674862
21500	ras_3	Ice2	-2.4029994	-1.8784953	0.016915693443198054	0.0257339557853328
21503	ras_3	CG2678	-2.4058855	-21.131966	0.01623031104615455	0.024827126350194732
21505	ras_3	Mco3	-2.4068027	-20.418314	0.01618974025589285	0.0247691957391724
21508	ras_3	stj	-2.4081533	-21.19511	0.016130156511739626	0.024690388053922433
21509	ras_3	Ltn1	-2.4081697	-1.8438362	0.016828779228707923	0.025618723979325565
21510	ras_3	CG42346	-2.4084833	-21.203342	0.016115625110480595	0.02467637856953596
21511	ras_3	FAM21	-2.409355	-1.8340034	0.0167932327449009	0.025568853374454987
21512	ras_3	Cyp6g1	-2.4105997	-20.04105	0.016022716247080515	0.024546405337612914
21513	ras_3	eIF4E3	-2.4108188	-20.06522	0.01601312859235633	0.02453581410067958
21514	ras_3	ect	-2.4108586	-1.5903171	0.01652409709026675	0.025217663140917737
21515	ras_3	mex1	-2.4108832	-20.46119	0.016010314577076572	0.02453581410067958
21517	ras_3	Cyt-c1L	-2.4110649	-20.475103	0.016002360336926934	0.024531605027786906
21521	ras_3	scat	-2.4122517	-1.5142968	0.016611869176617416	0.025326337603101493
21524	ras_3	CG4269	-2.413779	-1.9316837	0.016351610517673497	0.024991841829027875
21526	ras_3	Idgf3	-2.4145038	-22.425648	0.015852580710383948	0.024310885985986574
21528	ras_3	CG13877	-2.415149	-21.31555	0.01582461089015159	0.024279398815575393
21529	ras_3	ranshi	-2.4158828	-1.8448215	0.016486670666456506	0.025168919029074616
21530	ras_3	CG5285	-2.4160056	-1.847617	0.016461006639463902	0.025133921770191595
21533	ras_3	Cngl	-2.4190085	-21.697462	0.015658237832231463	0.024048264497945043
21536	ras_3	CG10274	-2.4202724	-1.8780385	0.016169512902424354	0.02474650223181709
21538	ras_3	CG6652	-2.4208684	-20.66066	0.015578610073579401	0.023937991529909733
21545	ras_3	CG30156	-2.4270785	-21.57102	0.0153153289137233	0.023568960547368546
21547	ras_3	CG8152	-2.4282548	-1.846306	0.015967191281312555	0.024481781418122107
21555	ras_3	Kif3C	-2.4346602	-20.992298	0.014999212397639943	0.023121265750730254
21560	ras_3	axed	-2.4393518	-21.831532	0.014806485187891124	0.02284720847610176
21561	ras_3	CG12768	-2.439447	-20.729656	0.014802604949089266	0.02284506314682826
21564	ras_3	Alp6	-2.441168	-20.177227	0.014732468641398601	0.022744472452436843
21573	ras_3	CG16952	-2.446041	-1.5102714	0.015223822388813873	0.023443868817953555
21574	ras_3	CG44102	-2.446458	-1.939669	0.014950370876019931	0.023057598384179336
21577	ras_3	CG13297	-2.4499223	-20.466755	0.014380257068399273	0.02226064764679658
21580	ras_3	CG5245	-2.4510381	-1.918059	0.014820685017391966	0.022861429898213062
21581	ras_3	CG6729	-2.4510913	-1.5130931	0.015027534750773822	0.02316103331737776
21582	ras_3	CG34263	-2.452262	-21.549143	0.014287397958210869	0.022128102003137192
21583	ras_3	Syt14	-2.4538836	-21.348	0.014223340087660435	0.022038629676829763
21587	ras_3	Ugt317A1	-2.4568803	-21.34032	0.014105642444826748	0.021879842676464145
21588	ras_3	CG14221	-2.4572546	-21.121683	0.014090998940146019	0.02186452144018937
21593	ras_3	LS2	-2.4597783	-21.59127	0.013992635413019943	0.02172291538315702
21596	ras_3	CG8777	-2.4613285	-1.9058958	0.014451880599363701	0.022360203119588862
21604	ras_3	CG16896	-2.4656746	-1.86752	0.014406950079383347	0.022297814210005512
21605	ras_3	sol	-2.4658458	-1.5466007	0.014409127024645524	0.022297814210005512
21606	ras_3	Cib2	-2.4666195	-22.045536	0.013729037708859804	0.021342582341373893
21607	ras_3	CG6421	-2.4668062	-20.948627	0.01372190193144093	0.021335104257070078
21608	ras_3	CG30356	-2.4671001	-21.539022	0.013710681142479348	0.021321271098686107
21611	ras_3	CG15544	-2.4684937	-1.8762115	0.01427346588228282	0.022110256537218452
21612	ras_3	Mid1	-2.4705918	-20.707773	0.013577997138633375	0.021136430903793895
21613	ras_3	sNPF	-2.470932	-20.98098	0.013565130862032693	0.021119985687960283
21619	ras_3	CG44004	-2.4752471	-1.9153049	0.01389923522863103	0.021585220586101846
21620	ras_3	CG12038	-2.4753766	-20.894611	0.013398022145271889	0.02089171536078681
21625	ras_3	ADPS	-2.4767134	-20.908098	0.013348114492970596	0.020817431662927963
21626	ras_3	rdo	-2.4770117	-1.6925951	0.01383664265808327	0.021491653358373795
21627	ras_3	CG14015	-2.4772537	-21.105389	0.013327995494163913	0.020789588347323
21628	ras_3	toe	-2.478172	-1.9040167	0.013831781682018091	0.021487740760669827
21629	ras_3	CG46448	-2.4782896	-20.64021	0.013289490753145276	0.020736577833351685
21630	ras_3	CG44098	-2.4785826	-21.351387	0.013278616741147485	0.02072313464875458
21631	ras_3	HHEX	-2.479625	-20.6047	0.013239996770235412	0.020676931126282536
21635	ras_3	Sr-CIV	-2.4844153	-21.901587	0.013063786765116386	0.020419121562170843
21640	ras_3	bond	-2.486422	-21.27355	0.012990593048669948	0.02030817706961097
21641	ras_3	CG31933	-2.4868026	-20.370878	0.01297675228830219	0.020293455300012374
21643	ras_3	CG7194	-2.48781	-1.8971283	0.01350602243917854	0.021035096907055354
21644	ras_3	CG31051	-2.4879668	-21.234009	0.012934496141323134	0.020230822041704698
21646	ras_3	GstE10	-2.48889	-21.206741	0.012901074160456723	0.020185428960127972
21654	ras_3	CG15043	-2.4956644	-21.448126	0.01265814441203052	0.01983577711022716
21656	ras_3	CG13658	-2.4959397	-20.627802	0.012648348965775939	0.019823813078406943
21660	ras_3	CG4297	-2.4995759	-21.034554	0.012519726844658382	0.01963899705928204
21662	ras_3	apolpp	-2.5001752	-20.88801	0.01249863595002694	0.019612619264836186
21667	ras_3	SmydA-5	-2.5053768	-20.588865	0.012316919256116948	0.019360584919457427
21668	ras_3	Asx	-2.5066268	-1.60095	0.012896827332565721	0.020182225955362527
21669	ras_3	Seipin	-2.507103	-1.8971153	0.012817328511860245	0.02007151204920938
21670	ras_3	CG16798	-2.507116	-21.811779	0.01225669193656642	0.019279127124635163
21674	ras_3	CG14346	-2.5087693	-21.409515	0.012199679562549899	0.019196031553146174
21676	ras_3	eIF4E6	-2.509188	-20.734905	0.012185276736105756	0.019176657642156144
21679	ras_3	CG18858	-2.5113795	-20.525251	0.012110134858023001	0.01907148769693804
21680	ras_3	Pi3K59F	-2.5129478	-1.6763164	0.012662479168763664	0.019839181416223806
21681	ras_3	UQCR-11L	-2.513084	-21.106247	0.012051982513204348	0.018986425061581366
21682	ras_3	CG15212	-2.5139036	-22.167439	0.012024107203429689	0.01894576396899663
21683	ras_3	Tsp42Eg	-2.5140293	-20.447332	0.012019840459796358	0.018942294094577736
21684	ras_3	bam	-2.5152075	-21.083523	0.011979876190241738	0.018882556956788858
21689	ras_3	Hsp67Ba	-2.519189	-1.7620244	0.012372637652397782	0.019434848563730466
21691	ras_3	gsb-n	-2.520176	-1.6517935	0.012421544676314575	0.01950499271011231
21700	ras_3	Vm32E	-2.524273	-21.086466	0.01167635535890733	0.01843899490842939
21702	ras_3	CG14445	-2.5248897	-20.905458	0.011655951602923834	0.018413112251519658
21704	ras_3	Ddc	-2.5260987	-1.5734994	0.012212439777949996	0.0192128146369498
21707	ras_3	ABCA	-2.5282204	-21.558369	0.011546333074237953	0.018252516532758997
21710	ras_3	CG7080	-2.5315704	-20.942719	0.011437004062204568	0.01810464324891769
21714	ras_3	Gad1	-2.535684	-20.79641	0.011304004662848687	0.017912649875930345
21715	ras_3	CG32599	-2.535692	-20.850548	0.011303755691428547	0.017912649875930345
21717	ras_3	CG42494	-2.5364635	-20.111553	0.011278963041040202	0.01787914407421283
21718	ras_3	pyr	-2.5366292	-1.5572568	0.011862836606756388	0.018714155066538833
21720	ras_3	vilya	-2.5376081	-20.878632	0.011242271092557645	0.017824060354970864
21721	ras_3	CG7990	-2.5376809	-21.035517	0.011239944453639307	0.017823451497086182
21722	ras_3	CG16984	-2.538211	-20.72068	0.011222990005045565	0.017801899228797265
21723	ras_3	CG2519	-2.5391228	-1.5798582	0.011770627048713626	0.01857507794495141
21726	ras_3	CG11598	-2.542871	-20.799055	0.011074950420891861	0.017580046732125057
21728	ras_3	CG6834	-2.5436676	-21.028053	0.011049816443703783	0.01754622116147148
21732	ras_3	Toll-9	-2.5461984	-20.405422	0.010970305817641352	0.01742901400465098
21737	ras_3	CG18754	-2.5468006	-21.021067	0.010951455614275423	0.01740207919310305
21738	ras_3	Rhau	-2.5471656	-1.6051611	0.011460615438615358	0.01813263435925089
21739	ras_3	CG43112	-2.5486507	-20.978596	0.010893742760058792	0.01731937096231839
21740	ras_3	CG42857	-2.5490332	-21.925804	0.010881846797621296	0.01730345656294201
21742	ras_3	CG8245	-2.5516179	-21.369427	0.010801742595934912	0.01718203680958787
21752	ras_3	Pebp1	-2.5596275	-1.9277134	0.01104739003344253	0.017545404804714424
21754	ras_3	eys	-2.5603428	-21.25364	0.010535214502599676	0.0167842668972655
21761	ras_3	CG7509	-2.5693169	-21.292269	0.010267195906485362	0.01639713184369072
21762	ras_3	Ugt35C1	-2.5700526	-21.463398	0.010245495675370945	0.016365324307369155
21763	ras_3	LysX	-2.570933	-20.943247	0.010219582009082616	0.016329617717403867
21764	ras_3	CG30380	-2.571097	-21.335638	0.01021476349116339	0.016324761371089375
21765	ras_3	CG5157	-2.5712535	-21.782722	0.01021016288249513	0.016320251645800143
21767	ras_3	vnc	-2.5725994	-20.762398	0.010170691968601531	0.016260638261031697
21771	ras_3	CG12239	-2.5760589	-20.378067	0.010069860249625289	0.01611845216160363
21772	ras_3	tea	-2.5761902	-1.9089073	0.0106370494243634	0.01693474379117373
21773	ras_3	Task6	-2.578522	-21.147697	0.00999860658796075	0.016015575322021625
21776	ras_3	Proc-R	-2.5788743	-1.8031534	0.010515667740594627	0.016756035345598417
21777	ras_3	CG42750	-2.5789542	-22.66102	0.009986150235388035	0.016001209991212927
21779	ras_3	CG17224	-2.5804183	-20.865576	0.0099440619793099	0.015942122778292562
21781	ras_3	CG33474	-2.5826936	-21.289976	0.009878963981422809	0.015854380711833878
21784	ras_3	botv	-2.5834868	-1.64706	0.010419867431869295	0.016620703005459106
21786	ras_3	CG7142	-2.583949	-21.603449	0.009843204175373464	0.015799754777650724
21788	ras_3	CG12971	-2.584756	-20.423061	0.009820291974061283	0.01576573558390416
21792	ras_3	nyo	-2.5858595	-21.24467	0.009789018233842178	0.01572102963338036
21794	ras_3	CG17075	-2.5883532	-21.0062	0.009718683669568396	0.015619009050322305
21795	ras_3	Eip63F-1	-2.5891862	-21.37223	0.009695293713547992	0.015589610904627205
21798	ras_3	CG1368	-2.5900314	-21.708597	0.009671608661828009	0.0155542523176638
21799	ras_3	CG42749	-2.5903013	-21.024721	0.009664056969457616	0.015544832169490468
21802	ras_3	CG2202	-2.5935044	-1.9292126	0.010073743434395613	0.01612185522598635
21804	ras_3	Fie	-2.5945716	-21.578873	0.009545255285965367	0.015372602641518737
21808	ras_3	yellow-f	-2.5951173	-20.808477	0.009530170408013482	0.015356395063843292
21809	ras_3	CG34171	-2.5956216	-21.01988	0.009516246554770008	0.015338057799533334
21811	ras_3	Ppi1	-2.596694	-21.209106	0.009486703817967042	0.015294413552951608
21814	ras_3	CG6454	-2.598787	-1.5256174	0.009970994558250708	0.015979716169772968
21821	ras_3	dati	-2.603604	-21.899214	0.009298268523317086	0.015001162950841262
21823	ras_3	CG6216	-2.6047835	-22.27901	0.009266438689978646	0.014962966381653302
21824	ras_3	Pdfr	-2.6050923	-21.863983	0.009258127378459319	0.014952177204253521
21826	ras_3	CG4325	-2.6057436	-20.764872	0.00924060454375987	0.0149291330672648
21827	ras_3	pie	-2.6071095	-1.6836998	0.009716040830405117	0.015617497305355107
21829	ras_3	CG14260	-2.6086173	-20.892485	0.00916365647053619	0.014817861846522656
21833	ras_3	HDAC6	-2.610083	-1.7117231	0.009620164875192206	0.015478734088574636
21834	ras_3	CG5022	-2.6101732	-21.960604	0.009122235645166463	0.014756084634062463
21841	ras_3	CG13955	-2.6158292	-21.07115	0.008973068566405187	0.014535293802395408
21843	ras_3	Sfmbt	-2.61678	-2.0175762	0.009285172697819796	0.01499057883204234
21845	ras_3	FoxP	-2.6175811	-22.172846	0.008927308316764792	0.014471387598289216
21846	ras_3	CG14609	-2.619915	-22.198465	0.008866669368793278	0.014383255208394329
21847	ras_3	tpr	-2.6200647	-21.835566	0.008862792746127536	0.01437950900896908
21849	ras_3	png	-2.6217499	-21.345514	0.008819259076452403	0.01431393985962335
21850	ras_3	Tbc1d8-9	-2.622121	-1.6328938	0.009295109838061007	0.015001162950841262
21852	ras_3	NtR	-2.6229362	-20.341986	0.00878872216419298	0.014266901248490903
21853	ras_3	CG42741	-2.6241462	-21.108376	0.008757677779576192	0.014224056227228105
21857	ras_3	sip3	-2.6257446	-1.6726137	0.009211417588754909	0.01488459957323464
21859	ras_3	ac	-2.6269197	-1.9838765	0.009096940229909221	0.014720357426704956
21860	ras_3	nvd	-2.6270323	-21.02069	0.008684023968256979	0.014119425821151476
21862	ras_3	Notum	-2.6284845	-1.9567823	0.009111296323329665	0.014740988144339565
21864	ras_3	alphaTub67C	-2.6293519	-20.493975	0.00862522418159046	0.014031282245761077
21866	ras_3	chp	-2.631031	-21.077965	0.008582888490321896	0.013967364650355339
21868	ras_3	CG31793	-2.6325355	-1.7180517	0.009046602961658544	0.014651823861115116
21870	ras_3	Mec2	-2.6329806	-21.10693	0.008533961534598402	0.013897603315573366
21874	ras_3	Dhc36C	-2.6352859	-21.422651	0.008476433725409384	0.013816180392721816
21875	ras_3	Eaat2	-2.6355548	-21.602163	0.00846974411203281	0.013810183441958598
21876	ras_3	ImpL1	-2.6356585	-22.662554	0.00846716877596838	0.013808438236670795
21877	ras_3	CYLD	-2.6376665	-1.5973073	0.008939465596985063	0.014488535038392147
21878	ras_3	CG7173	-2.637952	-21.655058	0.00841033172892211	0.01372062475335355
21883	ras_3	Gr63a	-2.6405199	-21.781408	0.008347102000229381	0.013624739521811877
21885	ras_3	Adgf-D	-2.6415021	-20.814377	0.00832302776304775	0.013590279360377844
21889	ras_3	CG10657	-2.6450753	-1.639063	0.008644767377706662	0.01405808945240316
21890	ras_3	CG15005	-2.6452675	-22.121334	0.00823132323177201	0.013452509912986852
21891	ras_3	Pex10	-2.64543	-1.5110753	0.008734860864136164	0.01419453567631054
21895	ras_3	Gr58c	-2.647565	-21.782331	0.008175811504798496	0.013368930771079344
21899	ras_3	CG15643	-2.652932	-1.9558378	0.00851926250953731	0.01387612879904222
21900	ras_3	CG13409	-2.6530678	-21.43972	0.008044214436146259	0.01317017620478978
21908	ras_3	CG33284	-2.6574767	-20.729195	0.007940152565650456	0.01301606213861764
21910	ras_3	CG14118	-2.6586788	-21.172407	0.00791198676620232	0.012976846367519893
21911	ras_3	CG31391	-2.6596751	-21.08518	0.00788871394922386	0.012943303019336357
21912	ras_3	CG6752	-2.6608372	-21.568777	0.007861648606798602	0.012908129199602214
21913	ras_3	CG7650	-2.6615775	-1.9606855	0.008296654571988176	0.013552039469110114
21916	ras_3	Mes2	-2.6628711	-21.758968	0.007814468882749425	0.012842155113599495
21917	ras_3	CG42717	-2.6629496	-20.820866	0.007812657541597733	0.012841478492325187
21920	ras_3	zye	-2.6650963	-21.645004	0.007763147389679966	0.012769250143476818
21923	ras_3	CG14628	-2.666819	-21.346964	0.007723623557399354	0.012710702071865403
21925	ras_3	FASN3	-2.6686206	-20.479937	0.007682483016023947	0.012645637185507664
21926	ras_3	mspo	-2.6691363	-21.582605	0.007670742276422982	0.012633110821428983
21929	ras_3	PPO3	-2.6708336	-22.201445	0.007632217044698911	0.012571919458727562
21930	ras_3	Hml	-2.6713648	-22.149536	0.007620192897052194	0.012554367001338461
21932	ras_3	Gr43a	-2.6717236	-22.087887	0.007612083517745869	0.0125432590293316
21935	ras_3	Hsepi	-2.672977	-1.6186228	0.008058154032370497	0.013190644647100678
21937	ras_3	CG43317	-2.6750197	-20.592525	0.007537933855836389	0.01243000415659577
21938	ras_3	CalpC	-2.6765137	-1.9768993	0.00791701870607717	0.012982778664568014
21941	ras_3	brp	-2.6781175	-21.4441	0.007468841072641456	0.012322714770991793
21943	ras_3	CG12241	-2.678678	-1.9514778	0.007946397001105613	0.01302397150502751
21944	ras_3	CG3788	-2.679131	-1.6550888	0.007797962340832224	0.012821918365078075
21950	ras_3	Mms19	-2.6823497	-1.6149342	0.007858286361049372	0.012905698431767752
21951	ras_3	hebe	-2.6825314	-20.88713	0.007371376060836726	0.012177237190885303
21954	ras_3	Yp1	-2.6833727	-20.917753	0.0073529263698305985	0.012151134625935832
21955	ras_3	Caf1-105	-2.6834717	-1.5087918	0.007803529616142203	0.012828773378983107
21958	ras_3	CG33775	-2.6841996	-21.624207	0.007334836341387482	0.012125607825627051
21959	ras_3	Oct-TyrR	-2.6849265	-22.136656	0.007318967066149556	0.012101553943399202
21960	ras_3	gogo	-2.6850636	-21.796684	0.007315974334524808	0.012098785962376553
21961	ras_3	CG3604	-2.6852562	-21.04217	0.0073117793558710115	0.012094028409972332
21963	ras_3	CG42391	-2.6865964	-21.25456	0.007282625954267468	0.01205015205237223
21964	ras_3	CG31220	-2.6873624	-22.027235	0.007266005683202137	0.012024820011432107
21965	ras_3	CG34396	-2.687537	-21.51515	0.007262225682445271	0.012020732570166942
21967	ras_3	Obp49a	-2.6877415	-20.75454	0.007257794810212255	0.012015566110374852
21968	ras_3	CG10321	-2.68828	-1.6091211	0.007743369772349807	0.0127390026288882
21970	ras_3	CG14490	-2.6887248	-21.864693	0.007236542397131889	0.011986870643380589
21971	ras_3	CG10413	-2.6902766	-1.6182599	0.007681142432385531	0.012645637185507664
21973	ras_3	side-III	-2.6920862	-22.244198	0.007164287040359035	0.011877906323688858
21974	ras_3	LPCAT	-2.6940315	-1.9571996	0.007593087195602193	0.012514204242796862
21975	ras_3	nAChRalpha1	-2.6944377	-21.275543	0.007114129171266693	0.011805414206252831
21976	ras_3	CG33225	-2.6959789	-20.707594	0.00708142976597413	0.011755404035247446
21978	ras_3	CG43778	-2.6974037	-20.714827	0.007051317101812608	0.011709653286720485
21982	ras_3	al	-2.7005205	-1.7164761	0.007394983016206064	0.012211837504263976
21986	ras_3	SP2353	-2.703688	-20.746376	0.006919875751766965	0.011508040605847727
21990	ras_3	wrapper	-2.7058737	-21.956915	0.006874673106871179	0.011439087006808681
21992	ras_3	Ace	-2.7069361	-22.01273	0.006852802972622853	0.011410974096881066
21993	ras_3	CG16978	-2.7078722	-22.259928	0.006833581458069838	0.011381032833144086
21995	ras_3	CG42260	-2.7109935	-21.299324	0.00676984121609501	0.011283068693491684
21996	ras_3	Blm	-2.7118707	-1.971461	0.007186521127345114	0.011910464476768681
22001	ras_3	CG15822	-2.7142646	-21.474802	0.006703614611744874	0.011180815135931506
22005	ras_3	CG13707	-2.7164793	-21.463615	0.006659109190418813	0.011110624990378726
22009	ras_3	NaPi-T	-2.7190082	-20.051498	0.006608611200721149	0.011032388603823972
22010	ras_3	mahj	-2.719178	-1.6258142	0.007041588721350368	0.01169561486574758
22012	ras_3	CG14322	-2.720454	-1.6569417	0.007023841228070536	0.011670362779345737
22013	ras_3	Vm26Aa	-2.721175	-21.608652	0.006565622940366285	0.010968607151831877
22014	ras_3	CG9498	-2.721545	-22.288652	0.006558307474871323	0.01095998514714177
22018	ras_3	CG7884	-2.7242117	-21.11162	0.0065057954948441465	0.0108805456917964
22019	ras_3	CG6569	-2.7254932	-21.499622	0.006480695808541841	0.010844498275282033
22021	ras_3	skl	-2.725953	-21.668867	0.006471710416385395	0.010833149456042317
22023	ras_3	CG15073	-2.7278287	-1.6410258	0.006868067858081424	0.011430169163413217
22026	ras_3	CG15765	-2.72931	-21.328192	0.006406453347767339	0.010732008301216968
22029	ras_3	CG5756	-2.7316403	-20.804035	0.006361505613719829	0.01066255279610512
22032	ras_3	THADA	-2.7348182	-1.669279	0.006631225170382831	0.011066113302703252
22036	ras_3	NetA	-2.7362201	-22.088524	0.0062739957271826215	0.010533195022305682
22037	ras_3	Cyp4ae1	-2.7365084	-20.67442	0.0062685208296645	0.010525929467820605
22038	ras_3	CG34216	-2.737777	-21.767153	0.00624449021977649	0.010490630679855848
22039	ras_3	dgo	-2.7381656	-1.9939114	0.006630671295951279	0.011066113302703252
22042	ras_3	CG17440	-2.740472	-21.343838	0.006193719806797311	0.010415355194820562
22043	ras_3	Ubx	-2.7430098	-22.207642	0.006146249244483062	0.010347126021675613
22046	ras_3	Rpp21	-2.7446876	-21.054453	0.006115045157922626	0.010298373591031588
22049	ras_3	dgt3	-2.744927	-1.5883181	0.006533706229133096	0.010923242465797406
22050	ras_3	CG11263	-2.744931	-22.468267	0.006110532493907051	0.010292663049678206
22052	ras_3	Eip78C	-2.7454236	-21.192986	0.006101403601184124	0.010279173345733444
22056	ras_3	CG7906	-2.7492425	-21.474709	0.00603105304811711	0.010169989288085735
22057	ras_3	CG16772	-2.749704	-20.953028	0.006022602891481245	0.010157606898775814
22058	ras_3	fry	-2.7497282	-1.9886614	0.006434535922657793	0.010775117191163579
22061	ras_3	CG15649	-2.7520268	-21.453571	0.005980224143856975	0.010091046114730846
22062	ras_3	Tsp42Ei	-2.7529478	-20.99261	0.005963494873854732	0.010069021985207429
22064	ras_3	ttm2	-2.7539258	-21.93213	0.0059457780856307955	0.010040955997729164
22065	ras_3	CG43646	-2.7540412	-1.9938654	0.006340902952411802	0.010635617867208829
22068	ras_3	Ttc26	-2.755573	-22.192383	0.005916045130001324	0.009999201626593027
22069	ras_3	CG1077	-2.7555757	-22.03171	0.00591599416671892	0.009999201626593027
22070	ras_3	tim	-2.7556765	-22.20895	0.005914179966984903	0.009999201626593027
22073	ras_3	mmd	-2.7567651	-21.973892	0.005894608484839534	0.009972899289766315
22076	ras_3	Ddr	-2.7580233	-21.09638	0.005872063050107884	0.009938420676026535
22077	ras_3	CG1695	-2.758197	-21.022541	0.005868952244068145	0.009934988346738973
22079	ras_3	CG7381	-2.7583184	-21.501915	0.005866783458035391	0.00993314970058585
22082	ras_3	Bili	-2.760325	-21.61206	0.0058310180063228505	0.009874416797344437
22083	ras_3	CG14253	-2.7603507	-21.065697	0.005830558317369207	0.009874416797344437
22088	ras_3	laza	-2.7637088	-21.160181	0.005771141746861595	0.009787472371063794
22090	ras_3	BtbVII	-2.765039	-1.5276843	0.006159974487937313	0.010364527035911397
22098	ras_3	CG33110	-2.7683852	-22.096447	0.005689312334078594	0.00965762084462
22099	ras_3	CG13386	-2.7691393	-22.54223	0.005676218329528192	0.009637176753038705
22100	ras_3	Efr	-2.7696638	-1.7186246	0.006069341283312318	0.010228913716824122
22102	ras_3	CG42300	-2.7734241	-21.707573	0.00560231272033453	0.009518744297975798
22104	ras_3	Rsph9	-2.7741516	-21.2612	0.0055898555613201695	0.009499337798687267
22106	ras_3	CG14431	-2.7745626	-22.426933	0.005582825324017772	0.009489148267481115
22108	ras_3	CG14694	-2.7763023	-20.937624	0.0055531595417883765	0.009440474114491079
22111	ras_3	CG32944	-2.7788353	-20.494234	0.005510226949969639	0.009374435799364257
22113	ras_3	CG13255	-2.7794986	-21.285732	0.005499033584998239	0.009358863502570735
22116	ras_3	CG30344	-2.7801685	-1.5760894	0.005899251798397003	0.009977075622173735
22118	ras_3	MED23	-2.7803867	-21.925028	0.005484075254050289	0.009335137375864824
22119	ras_3	Atx-1	-2.7807376	-21.429153	0.00547817658084878	0.009326826893540092
22121	ras_3	mil	-2.781397	-20.822851	0.00546710724343733	0.009309708418436804
22122	ras_3	slou	-2.7818882	-21.93726	0.005458874581455477	0.009297414940570634
22124	ras_3	CG12851	-2.7827477	-21.080416	0.005444497886679415	0.009278683796487743
22125	ras_3	for	-2.7844791	-1.6763479	0.005789548826692327	0.009816874974108686
22126	ras_3	Mcm2	-2.7846315	-1.9921029	0.005823953281145036	0.00986748508595138
22127	ras_3	CG14367	-2.7848747	-21.11678	0.005409062018264273	0.009227992565558703
22128	ras_3	tty	-2.7849114	-22.205729	0.005408453659223777	0.009227992565558703
22129	ras_3	nerfin-1	-2.78504	-21.662449	0.005406320639975938	0.009227992565558703
22132	ras_3	CG13563	-2.7866833	-21.037506	0.005379095352660951	0.009185408498169408
22135	ras_3	Spec2	-2.7876563	-2.00633	0.0057398938972949235	0.009739879139574796
22136	ras_3	CG11723	-2.787668	-1.5778663	0.0057622723085341936	0.009774237092032024
22137	ras_3	fuss	-2.7897565	-2.238307	0.005456064234249296	0.009296079730591883
22138	ras_3	CG13532	-2.7902412	-21.097347	0.005320581560116679	0.009090565328504755
22140	ras_3	Spn42Db	-2.79108	-20.678429	0.005306872499433768	0.009070520712053803
22141	ras_3	CG12942	-2.791477	-1.7670091	0.005700554034104963	0.009674913663135965
22142	ras_3	CG42711	-2.7925286	-21.074678	0.005283266462175041	0.009035222700923766
22143	ras_3	CG18281	-2.7945993	-22.299622	0.005249694581850127	0.008982832485728258
22147	ras_3	Traf6	-2.8026555	-1.523131	0.005518247323496423	0.009384600406502257
22148	ras_3	Qsox3	-2.8036184	-21.366323	0.005105691427599937	0.008756022214622322
22150	ras_3	CG31337	-2.8044522	-22.41875	0.0050925620372788685	0.008735138659942722
22151	ras_3	CG16799	-2.8045268	-20.579927	0.005091389147613705	0.008734759803544455
22152	ras_3	Mst87F	-2.8047075	-20.93815	0.005088547836782715	0.008731517935754893
22163	ras_3	CG42322	-2.8116777	-21.10921	0.004980050622415133	0.00855975355201552
22165	ras_3	ry	-2.815443	-1.7465818	0.005291180497368507	0.009047070641698855
22167	ras_3	Aduk	-2.8159945	-2.0171504	0.005269225375217592	0.009012890159884678
22168	ras_3	CG3119	-2.816148	-20.943872	0.004911570316143592	0.008446796185682746
22172	ras_3	lbe	-2.819038	-22.174744	0.004867757390215545	0.008376157924836388
22175	ras_3	Hasp	-2.8225467	-21.986412	0.004815037641692083	0.008291661104077488
22177	ras_3	dpr14	-2.8229716	-21.366333	0.00480868678694541	0.008282279194710744
22178	ras_3	Lip4	-2.823599	-21.578608	0.0047993261717694975	0.008267995660595986
22183	ras_3	CG6470	-2.825459	-21.04407	0.00477167024808877	0.008226244743745672
22184	ras_3	Dtd	-2.8259819	-1.6566907	0.005128101195114015	0.008789525212996654
22185	ras_3	CG14879	-2.8270168	-2.017491	0.005113047389717545	0.008765360575608833
22186	ras_3	CG9593	-2.8281221	-21.006916	0.004732327322595275	0.00816148556105482
22187	ras_3	Ice1	-2.8281603	-1.6862344	0.005043267349955717	0.008657058547398259
22188	ras_3	smp-30	-2.8282037	-21.0086	0.004731126826331142	0.008160949169315328
22189	ras_3	CG2887	-2.8282862	-21.448488	0.004729912639264818	0.008160388955482269
22193	ras_3	CG14212	-2.8323293	-20.49544	0.004670769473671234	0.008068971930132474
22194	ras_3	Rpb4	-2.8327162	-20.74921	0.004665141309974561	0.008060766764409906
22196	ras_3	CG34328	-2.8340013	-21.550268	0.004646505514164554	0.00803159157732852
22200	ras_3	ouib	-2.8358984	-21.851404	0.0046191152713457246	0.007993241619765803
22203	ras_3	CG34136	-2.8374977	-21.928885	0.0045961395627903195	0.007956524620490788
22204	ras_3	SK	-2.8377252	-21.694748	0.004592879502674933	0.007952381475192019
22205	ras_3	bdl	-2.839756	-21.739452	0.004563871047941862	0.007906630827958193
22210	ras_3	CG15046	-2.8454027	-2.223233	0.004621500178154074	0.007994139424430228
22212	ras_3	CG13010	-2.8462846	-21.34213	0.004471737167169635	0.007752870088583032
22213	ras_3	fzr2	-2.8463206	-21.237991	0.004471233191316011	0.007752870088583032
22214	ras_3	CG9297	-2.8468752	-21.58514	0.004463486799249802	0.007744419701799723
22218	ras_3	NaCP60E	-2.8496642	-1.6805731	0.004762691406458379	0.008212308523633834
22220	ras_3	Fmo-2	-2.8509002	-21.59159	0.004407621168791079	0.007660527414975971
22222	ras_3	CG33509	-2.851831	-2.0629315	0.0046836136081103395	0.008088114973538936
22223	ras_3	CG45066	-2.8522294	-21.537584	0.0043893144672128015	0.007630155406721762
22224	ras_3	CG17752	-2.8531055	-21.830221	0.004377282192447171	0.00761068109071495
22225	ras_3	CG10993	-2.8532624	-21.72247	0.004375133501300001	0.007608387011832356
22229	ras_3	CG13460	-2.856836	-22.306261	0.004326391187107764	0.007527904255966951
22232	ras_3	pygo	-2.8589954	-2.0274947	0.00464499436813551	0.008030492430307765
22234	ras_3	Pde1c	-2.8607075	-22.20236	0.004274147237277954	0.007444058637438349
22235	ras_3	Scgalpha	-2.8620164	-21.080303	0.004256615320897396	0.007414931757971067
22243	ras_3	CG2082	-2.8688662	-21.283936	0.004165920078868204	0.007266600137569537
22245	ras_3	Cyp4d14	-2.8705695	-22.144884	0.004143641947671324	0.007230489705189121
22246	ras_3	Cpr49Aa	-2.8706899	-23.298683	0.004142070490391308	0.007229122455647755
22250	ras_3	Tsp47F	-2.8737335	-21.14814	0.004102541578592558	0.007164221352034016
22260	ras_3	Chsy	-2.8805473	-1.5447494	0.0043400047988768065	0.007550160035967898
22261	ras_3	trv	-2.88104	-21.61717	0.004009046900610844	0.007016979266139736
22263	ras_3	CG31115	-2.8832257	-21.098007	0.00398145931510674	0.006972683568639881
22264	ras_3	NimB4	-2.8849368	-21.87326	0.003959981108421913	0.006939042526694243
22268	ras_3	Gr93b	-2.8875227	-20.706549	0.003927723127948982	0.006889095717631794
22269	ras_3	Wnt5	-2.8878255	-2.045323	0.0042424421741591375	0.007391645831353985
22270	ras_3	c(2)M	-2.8895485	-1.512071	0.004207424844139619	0.007334813403948508
22271	ras_3	CG14223	-2.8898947	-1.5573868	0.004231692478302358	0.007374316901884926
22272	ras_3	7B2	-2.8899753	-22.161821	0.0038973455803784215	0.006838429087774339
22273	ras_3	Esp	-2.8901057	-21.92187	0.0038957361587929925	0.006836912635219149
22274	ras_3	CG17726	-2.8905907	-1.6807368	0.004219917224764539	0.007355193871051414
22275	ras_3	Plekhm1	-2.8912997	-2.0501058	0.004191846458585112	0.0073090443286808054
22276	ras_3	CAH7	-2.8939037	-21.405083	0.003849139140467295	0.006761661144871654
22277	ras_3	CG7997	-2.894014	-21.347433	0.0038477937769282227	0.006761661144871654
22278	ras_3	pdm3	-2.8946943	-21.379757	0.003839501419411418	0.006748548950785395
22280	ras_3	mip130	-2.8962061	-1.6917616	0.004158713814321059	0.0072554096304232206
22281	ras_3	mthl14	-2.8962603	-21.838556	0.003820480948214377	0.00671769120350075
22282	ras_3	her	-2.896362	-1.8917971	0.004120539414908194	0.007194281471319254
22283	ras_3	CG11658	-2.8986154	-1.5837047	0.004075076938023148	0.007121682077402359
22284	ras_3	CG9801	-2.8988726	-1.7036314	0.004101903347650759	0.007164221352034016
22289	ras_3	Lcp65Ag1	-2.903772	-1.7538162	0.003980332102539786	0.0069721777429877976
22297	ras_3	Pdp	-2.9096267	-1.5408974	0.003949835018456318	0.006924834006078418
22299	ras_3	ItgaPS5	-2.9104514	-22.489283	0.0036519637104238437	0.006444848440688356
22300	ras_3	CG10863	-2.9113069	-1.5325772	0.003950363072241355	0.006924834006078418
22302	ras_3	Cpr49Ah	-2.9119623	-22.606	0.0036344282675248034	0.006420999088517024
22303	ras_3	CG14650	-2.9131932	-1.6907903	0.003938891157859879	0.006907363603471787
22304	ras_3	CG5116	-2.9139643	-21.261082	0.0036113093157300043	0.006381695487639212
22306	ras_3	CG32284	-2.916622	-21.632368	0.0035808231156223775	0.0063363649153009285
22309	ras_3	Scgbeta	-2.9196556	-21.912357	0.0035463149770445517	0.006278934757696596
22310	ras_3	CG6294	-2.9198308	-21.34432	0.0035443302107223606	0.006276631863226724
22311	ras_3	Ndc80	-2.9204082	-1.5912918	0.0038491723334784355	0.006761661144871654
22315	ras_3	CG32712	-2.921486	-22.21777	0.003525638845051097	0.006247148783959794
22317	ras_3	Tsp42Ep	-2.922202	-21.707472	0.003517578752267319	0.006234070900531708
22318	ras_3	fs(1)Yb	-2.9236627	-21.489407	0.0035011942931210804	0.006209831362726834
22320	ras_3	Hk	-2.9256487	-21.483643	0.0034790242668134154	0.0061740904541611385
22321	ras_3	cort	-2.926016	-2.1667027	0.0036484736004009843	0.0064399279114426755
22322	ras_3	mei-P22	-2.9268565	-20.223732	0.0034656055591766504	0.006151466629028007
22324	ras_3	Mlp60A	-2.9290452	-21.645903	0.0034414081719759838	0.006113246849541075
22325	ras_3	CG6356	-2.9293203	-20.918854	0.0034383774980033	0.00610904600003491
22327	ras_3	CG16985	-2.9303272	-1.5613114	0.003736539186750044	0.006575133685928588
22328	ras_3	inaE	-2.9309375	-1.8438759	0.0037033642058996947	0.006523011439648628
22329	ras_3	CG42561	-2.9311018	-20.876905	0.003418813573599797	0.006077817193911672
22330	ras_3	CG33514	-2.9312346	-2.1146364	0.0036394602513050655	0.006426114688169006
22331	ras_3	CG13101	-2.9327009	-21.354973	0.003401337138661493	0.0060509856977901755
22334	ras_3	CG6362	-2.933336	-21.544222	0.0033944180285216765	0.0060426436576807106
22335	ras_3	Clk	-2.933658	-21.555365	0.00339091573441398	0.0060375804120411936
22336	ras_3	CG2861	-2.9339004	-21.94744	0.003388280436999246	0.006034059202148308
22338	ras_3	CG12723	-2.934433	-21.08355	0.003382498073184905	0.006026100936208059
22341	ras_3	CG42562	-2.935381	-20.975754	0.003372229968449561	0.006008974550500043
22348	ras_3	CG4743	-2.938237	-1.5556465	0.0036399474696909347	0.006426114688169006
22352	ras_3	pbl	-2.9416327	-2.073094	0.0035825170746771598	0.00633814002317064
22354	ras_3	Grip91	-2.943946	-2.05758	0.003584471538400375	0.0063391531158102235
22357	ras_3	MED1	-2.944492	-1.7988815	0.0035626257113275106	0.006305380189319041
22359	ras_3	LanA	-2.9448736	-2.069681	0.003552159670291042	0.006288069645942564
22360	ras_3	CG9416	-2.9457328	-22.264996	0.003261918782283697	0.005824854968363744
22362	ras_3	CG31883	-2.9469316	-21.274742	0.0032493602559506315	0.005803558564988718
22365	ras_3	C1GalTA	-2.9495306	-1.7285333	0.0034861748217974602	0.006184387855760189
22366	ras_3	SmydA-1	-2.9497488	-21.42914	0.0032200190493043178	0.005754513980788296
22368	ras_3	CG11034	-2.95273	-21.93622	0.003189233664012134	0.005705893030634438
22372	ras_3	CG11247	-2.955848	-2.0768833	0.0034254569286845406	0.0060872685106877125
22373	ras_3	CG13502	-2.9572437	-21.555338	0.00314313072038349	0.005625872875442551
22379	ras_3	rg	-2.9608953	-20.850908	0.0031062805723810014	0.005564718992813571
22382	ras_3	CG1545	-2.9625363	-21.650997	0.003089848245548629	0.005538065570015368
22384	ras_3	CG14131	-2.9635022	-20.702362	0.0030802144322312082	0.005521877181657158
22385	ras_3	Lnk	-2.9635427	-1.7094958	0.0033705999716299733	0.006008403874044105
22391	ras_3	P5cr-2	-2.9674463	-21.667917	0.0030411559766191027	0.005457188751316305
22392	ras_3	l(3)72Dr	-2.9677587	-22.089266	0.0030380826903335986	0.005452740352858131
22393	ras_3	CG31810	-2.9683516	-21.520227	0.0030322545540415707	0.005443344850974645
22396	ras_3	CG4194	-2.969181	-21.534718	0.003024119877713128	0.005430867073403396
22399	ras_3	gl	-2.97254	-21.917185	0.0029913845339299898	0.005377110327286458
22400	ras_3	fig	-2.9732387	-21.272308	0.002984613440824531	0.005366836383806011
22402	ras_3	CecB	-2.9737504	-21.296183	0.0029796674342256763	0.005359429270539224
22403	ras_3	CG15082	-2.9751885	-22.08709	0.002965798325711088	0.005337622526166974
22404	ras_3	Usp1	-2.9752824	-2.0916367	0.0032150833092952046	0.005746812655909507
22406	ras_3	pb	-2.9772866	-21.600534	0.002945674254790622	0.005304526258626881
22410	ras_3	CG11927	-2.9803252	-1.5555475	0.0032036858536511957	0.005728672326495755
22411	ras_3	l(3)mbt	-2.9804053	-1.7484344	0.0031897030358718293	0.005705893030634438
22412	ras_3	CG32641	-2.9839396	-21.731916	0.002882676293653246	0.005197200824183245
22414	ras_3	CG8492	-2.9850523	-21.288115	0.0028722607844877666	0.005179440388694037
22415	ras_3	EDTP	-2.9864388	-1.7440779	0.0031222213573450517	0.005590628601413124
22417	ras_3	CG1812	-2.9888387	-2.0754375	0.003108107843418105	0.005566443385391589
22421	ras_3	CG9928	-2.9932256	-21.59718	0.0027968071248881915	0.005056296624797864
22424	ras_3	Pde8	-2.995088	-22.01959	0.0027798668615971406	0.005029634875794472
22427	ras_3	CG31807	-2.9975414	-21.601093	0.00275769828916196	0.004993463943765735
22429	ras_3	CG13875	-2.9978845	-21.38138	0.002754609730240774	0.004988855956367765
22430	ras_3	CG11668	-2.9995646	-21.411589	0.002739537064298837	0.004964497840201822
22431	ras_3	CG9150	-2.9995854	-21.787683	0.002739351795975881	0.004964497840201822
22432	ras_3	CG32214	-2.9998426	-21.79718	0.0027370497564127207	0.004961950506833968
22434	ras_3	TM4SF	-3.0021584	-21.952106	0.0027164139669568392	0.0049264870818005535
22437	ras_3	CG12024	-3.0028262	-1.9310076	0.0029716503503957993	0.005347105700114034
22438	ras_3	CG15201	-3.0033298	-22.270948	0.0027060311979212105	0.004910568876765646
22441	ras_3	mael	-3.004815	-21.658455	0.002692915537739202	0.004887734927548403
22442	ras_3	CG9837	-3.0054846	-21.961603	0.0026870236411255456	0.004878005917555774
22444	ras_3	Rubicon	-3.0066905	-2.2189748	0.00281059722655356	0.005075966046876672
22447	ras_3	CG4998	-3.007065	-1.8895197	0.002911229365693196	0.005246617448484595
22449	ras_3	Rab3	-3.0078413	-21.863821	0.0026663749676317976	0.004842436723678096
22452	ras_3	CG7720	-3.010667	-20.473993	0.0026418093659602293	0.004804479867727474
22453	ras_3	nAChRbeta3	-3.0114002	-2.1224444	0.0028488939541749304	0.00514033471574336
22454	ras_3	CG6201	-3.0119638	-21.447803	0.002630606639298965	0.004785054701738304
22456	ras_3	Dcr-1	-3.0148022	-2.1994126	0.0027531624060657934	0.00498721916597308
22457	ras_3	dnc	-3.0153983	-1.7776207	0.002794451201669556	0.005053033065691403
22459	ras_3	Sobp	-3.0181715	-21.335976	0.002577570509172163	0.004697896190237306
22461	ras_3	CG13230	-3.0184498	-23.48717	0.0025752179249760973	0.004694540922244326
22462	ras_3	CG11103	-3.0185573	-1.568538	0.0028110063742975877	0.005075966046876672
22463	ras_3	Rbcn-3B	-3.0185606	-2.0953274	0.002813668876861098	0.005079774093900153
22465	ras_3	CG5639	-3.0191605	-22.006369	0.002569212489313309	0.0046845239645170135
22472	ras_3	CG18636	-3.0261374	-21.832325	0.0025109500734899434	0.004587408786194789
22474	ras_3	Tsp96F	-3.0266817	-2.1013947	0.0027450921998027167	0.004973582332778421
22478	ras_3	Naa60	-3.0297303	-1.5016923	0.002722583800293358	0.004936700863180149
22479	ras_3	CG11000	-3.0305836	-2.1578887	0.002649082028186642	0.004815797029643835
22480	ras_3	CG34434	-3.0312352	-21.576864	0.002469146433651062	0.004517171145990612
22481	ras_3	CG18335	-3.032098	-21.520779	0.002462133153463763	0.004505399218793384
22484	ras_3	CG3868	-3.034635	-21.39603	0.002441621475966256	0.004472325222996686
22485	ras_3	Dhc62B	-3.0358229	-21.703402	0.0024320708436007745	0.004457500996811248
22486	ras_3	Myo81F	-3.0361512	-22.2782	0.0024294374913306992	0.004453564232359474
22487	ras_3	CG16789	-3.0365481	-22.435066	0.002426256760781691	0.004448622258227821
22488	ras_3	msl-2	-3.0368245	-2.1067336	0.002654839270305363	0.004825307112728151
22491	ras_3	CG15247	-3.0388944	-21.874624	0.002407535293781049	0.004417827264088224
22492	ras_3	CG5758	-3.0397568	-21.78535	0.002400687431300628	0.004406142664969645
22496	ras_3	CG14079	-3.0419788	-21.486464	0.0023831243972250705	0.004377410679587592
22498	ras_3	Hayan	-3.0449767	-1.7503799	0.0025988691805022054	0.004732015227447457
22499	ras_3	SMSr	-3.0454867	-1.6333648	0.0025881926930418665	0.0047144466862535485
22504	ras_3	CG43740	-3.0481725	-21.649633	0.0023347889351549886	0.0042937840208552855
22506	ras_3	CG9289	-3.0504148	-21.07616	0.002317512874782963	0.004263721801911707
22510	ras_3	dpr12	-3.052733	-21.825901	0.0022997752722455924	0.004235334829958513
22513	ras_3	ProtB	-3.0542982	-21.539783	0.0022878696498654393	0.004215947788213578
22515	ras_3	lute	-3.054672	-2.1223898	0.002496806986533901	0.004564296493613975
22522	ras_3	Naus	-3.0609083	-1.646941	0.0024695510047181373	0.004517171145990612
22525	ras_3	CG15202	-3.0623157	-21.902723	0.00222776758130628	0.004115941916730793
22526	ras_3	CG15390	-3.0637238	-1.77821	0.002439036115681866	0.0044684817015537386
22528	ras_3	sro	-3.0644195	-22.009218	0.0022122366914701596	0.0040888943682994994
22529	ras_3	CG9485	-3.0649495	-2.1482475	0.0023919783961891352	0.004392794592681208
22538	ras_3	CG13403	-3.0718222	-22.46968	0.0021583790567636816	0.003999016123951289
22539	ras_3	pcm	-3.0721438	-2.1207337	0.0023688268216981887	0.004353763238998574
22544	ras_3	Vha68-1	-3.0769181	-21.83562	0.0021220062639352457	0.003937986948140348
22545	ras_3	Pde6	-3.0776138	-21.73357	0.002117084469904393	0.003930443142730233
22546	ras_3	CG42846	-3.0780866	-22.619242	0.002113745424348363	0.003925038305686346
22547	ras_3	CG10339	-3.078184	-21.240454	0.002113059061365154	0.0039245580744990466
22548	ras_3	Ccp84Ac	-3.0793989	-22.329536	0.0021045044087208264	0.003910252723777558
22550	ras_3	CG15011	-3.0804462	-2.119953	0.0023119851262570906	0.004255258482128145
22552	ras_3	Oga	-3.084666	-1.7565222	0.002283596718818209	0.004208919223615321
22555	ras_3	CG10063	-3.0849378	-22.451332	0.0020659020702533805	0.003846317267567931
22557	ras_3	teq	-3.0854461	-21.738844	0.0020623913533024244	0.003841339964788823
22559	ras_3	MED24	-3.0870109	-2.1106968	0.002278959779539032	0.004201216792700546
22561	ras_3	dpr16	-3.088959	-21.650782	0.0020382864274774985	0.003797984965902934
22564	ras_3	SCCRO3	-3.090357	-1.7559158	0.0022579262500067583	0.004165789934408206
22566	ras_3	sud1	-3.0908391	-2.1183918	0.002239632551966902	0.004135364995833432
22568	ras_3	GCS1	-3.092009	-1.7533258	0.002248668321754854	0.004150378566103558
22569	ras_3	CG4908	-3.0921113	-1.5005648	0.0022437015414616002	0.00414204459615899
22570	ras_3	mu2	-3.0923235	-1.8066775	0.002203439615722986	0.004073455263803827
22572	ras_3	Grip163	-3.094002	-2.2319129	0.002126430849919745	0.003945400009709538
22574	ras_3	Atg16	-3.0959356	-1.659917	0.0021834741831662854	0.0040398014983969895
22575	ras_3	CG32195	-3.0965116	-2.1487153	0.00217500016872349	0.004026559029063362
22577	ras_3	CG18823	-3.098067	-21.815054	0.00197698462584565	0.0036935112893776902
22579	ras_3	CG12310	-3.099452	-23.336416	0.0019678126191064586	0.003678622815872404
22580	ras_3	dac	-3.099692	-2.1684284	0.0021359740860607893	0.003961504394503284
22581	ras_3	CG5913	-3.1002872	-1.6468378	0.002176423568559418	0.004028381327724967
22584	ras_3	Prip	-3.101481	-21.825579	0.0019544464803411855	0.003655870837335449
22589	ras_3	CG4660	-3.1042857	-21.34295	0.0019361087504062835	0.003623785757849378
22591	ras_3	Pfas	-3.1049182	-2.1338964	0.002133790344555943	0.003958254430105292
22594	ras_3	Tnpo-SR	-3.1066706	-2.1504753	0.0021019769215570075	0.00390634763121036
22595	ras_3	CG10804	-3.106987	-21.519566	0.001918595145250396	0.0035932048290819316
22597	ras_3	CG13982	-3.108798	-21.61533	0.0019069349544190044	0.003572825853950248
22598	ras_3	mof	-3.1114247	-1.8925354	0.002083973272449311	0.003875244178095345
22599	ras_3	CG5381	-3.111569	-21.896221	0.0018892225184779419	0.0035432576874560744
22601	ras_3	ast	-3.112237	-1.6482615	0.0020902387618583367	0.0038853202269145547
22602	ras_3	CG11257	-3.1130002	-2.2123854	0.0020129033391187087	0.0037560276868851233
22604	ras_3	ecd	-3.1148584	-1.631692	0.0020834796014551986	0.003875244178095345
22609	ras_3	dmrt93B	-3.1170242	-21.387957	0.0018547895329217364	0.003483663042898041
22611	ras_3	CG4301	-3.1194599	-22.33728	0.0018396043219159263	0.003457973704892158
22615	ras_3	TTLL6B	-3.1211007	-22.18845	0.0018294377904952838	0.0034402729509723775
22622	ras_3	CG33109	-3.1303217	-21.350199	0.0017732621515802887	0.0033449178126540194
22625	ras_3	dbo	-3.1319818	-1.5749218	0.0019708733284920896	0.0036835939680005952
22629	ras_3	CG13377	-3.1342762	-1.6264594	0.0019456328369367494	0.003640126688192226
22630	ras_3	CG11899	-3.1343834	-2.169355	0.001909579278467453	0.003577049791739257
22631	ras_3	Pgant6	-3.1344612	-1.6015638	0.0019189985974487748	0.0035932269656311243
22633	ras_3	CG18641	-3.1350718	-22.176756	0.001744948878840481	0.003295575537950064
22636	ras_3	CG8097	-3.1392288	-1.5838628	0.0019253123836739255	0.0036043136339947495
22639	ras_3	CG15118	-3.1438766	-1.514583	0.0018964102736347438	0.0035560114981808247
22640	ras_3	PGRP-LC	-3.143877	-21.631994	0.0016935594652275597	0.0032037954831882183
22643	ras_3	CG9117	-3.149051	-1.62759	0.0018416365785717539	0.003460617877164956
22644	ras_3	CG1750	-3.1490731	-1.6551791	0.0018596745203051438	0.0034914085786371383
22647	ras_3	Gem3	-3.150974	-1.7745764	0.0018482672282120658	0.00347212363203229
22653	ras_3	CG15418	-3.1550293	-22.59059	0.0016304739627591854	0.0030882738662913966
22657	ras_3	Galt	-3.158016	-2.16104	0.0017785121632118382	0.0033541313663861495
22658	ras_3	HLH3B	-3.1582055	-22.072762	0.0016129068059012053	0.0030575247818478424
22659	ras_3	dpr19	-3.1584048	-21.465176	0.0016118103018092258	0.003056077602624436
22661	ras_3	CG18130	-3.1592064	-21.327364	0.0016074076513358764	0.0030489901180497554
22664	ras_3	mTerf5	-3.1602888	-1.508512	0.0017877786612604273	0.00336952942010362
22668	ras_3	dtr	-3.1629593	-21.257744	0.0015869399037758125	0.003012657483373284
22671	ras_3	yellow-c	-3.1637957	-1.8989303	0.0017598367433953248	0.0033210047040091997
22672	ras_3	fzo	-3.1641583	-21.539433	0.0015804506386076374	0.0030022017824482554
22673	ras_3	CG7110	-3.165046	-1.8871244	0.0017555498519030645	0.003314232487903419
22674	ras_3	dmGlut	-3.1656137	-22.288307	0.0015726092973846976	0.002990402135441368
22676	ras_3	Gpb5	-3.1666658	-22.147715	0.00156696106233874	0.0029802793836977487
22677	ras_3	Cep135	-3.167865	-1.8938572	0.001735653039692958	0.003279369159634038
22680	ras_3	BoYb	-3.1733632	-21.480087	0.001531448948199554	0.002917575602103594
22684	ras_3	beat-IIIc	-3.1757474	-21.894619	0.0015189864982481556	0.0028968408067817143
22689	ras_3	CG10508	-3.1789696	-21.387465	0.0015022924869437632	0.0028697758833456234
22692	ras_3	fon	-3.1832712	-21.924747	0.0014802710434294955	0.0028318362851262767
22693	ras_3	Alk	-3.184717	-22.831913	0.0014729362588801634	0.002820745183724796
22694	ras_3	car	-3.185608	-1.516054	0.0016525981264885986	0.0031288872906588714
22695	ras_3	CG46388	-3.1861558	-22.273405	0.0014656698211358368	0.002808001797644874
22696	ras_3	CG8925	-3.1883347	-22.660795	0.0014547288978217796	0.00279112037589185
22697	ras_3	CG45081	-3.1890922	-21.858286	0.0014509434308361167	0.002784439652357534
22701	ras_3	CG5079	-3.1916919	-21.834414	0.0014380198403204617	0.002763106185327798
22702	ras_3	vvl	-3.192476	-2.2256775	0.0015592673490419703	0.0029668763847905595
22704	ras_3	CG1494	-3.1944947	-21.193316	0.0014242055965796034	0.002738282973306341
22705	ras_3	Edg78E	-3.1945882	-22.643866	0.001423746511100363	0.002738282973306341
22706	ras_3	Obp99a	-3.1950388	-22.607714	0.0014215378971920247	0.0027354467715471533
22707	ras_3	CG3295	-3.1952832	-1.5424507	0.0015872829853792688	0.003012685434599667
22708	ras_3	Pof	-3.195411	-2.1600597	0.0015859017804373484	0.0030113097755613974
22710	ras_3	CG14107	-3.1958838	-21.755583	0.001417404860938833	0.002729185813130734
22711	ras_3	CG16749	-3.1965265	-21.6377	0.0014142670851305618	0.002723867819866171
22717	ras_3	mus302	-3.2026272	-2.1772125	0.0015391146871588152	0.002931570947619292
22719	ras_3	GstD4	-3.2032952	-2.2183573	0.0015042452919329708	0.00287290810855225
22721	ras_3	CG9184	-3.2044709	-21.692957	0.0013760226109306296	0.002654543199177571
22723	ras_3	CG31551	-3.2058547	-21.916315	0.0013694587264952488	0.002643548036102232
22726	ras_3	CG17261	-3.206752	-22.07341	0.0013652180947975642	0.002635916670826526
22729	ras_3	CG4702	-3.2080023	-22.587225	0.0013593298262924314	0.0026251002223180507
22730	ras_3	ana1	-3.2091768	-2.1756825	0.0015046807968399846	0.002873141792092999
22732	ras_3	Dll	-3.2098126	-2.2512224	0.00146130547900649	0.0028019807251587346
22734	ras_3	pon	-3.210256	-22.320307	0.0013487747374571154	0.0026069113579458678
22735	ras_3	Fcp3C	-3.210678	-21.763998	0.0013468064584240887	0.002603655553316691
22736	ras_3	CG7601	-3.2107682	-1.7195805	0.0015106171720631898	0.002882677319816923
22737	ras_3	CG15343	-3.2114437	-21.905632	0.0013432434286454284	0.0025989579202492213
22738	ras_3	CG31689	-3.2124665	-22.138697	0.0013384965673331368	0.002590319764876931
22739	ras_3	CG17778	-3.2129228	-22.183601	0.0013363835781851183	0.0025867762299258356
22746	ras_3	CG32212	-3.2155817	-21.89	0.0013241328227426988	0.002564144923736653
22747	ras_3	CG5810	-3.2163725	-21.636578	0.00132050918637045	0.00255874800104517
22750	ras_3	CG10550	-3.2171996	-22.349878	0.0013167297981726198	0.002552502830812125
22753	ras_3	CG17931	-3.2190845	-1.5696942	0.00147604699450959	0.002824933494915621
22755	ras_3	CG4610	-3.2206023	-1.6251502	0.0014622438781933139	0.0028031942295076587
22758	ras_3	CG33090	-3.2207665	-2.189127	0.001442112157497707	0.0027703892472867382
22759	ras_3	DUBAI	-3.2208495	-1.539216	0.001467167519458307	0.0028102843405072996
22760	ras_3	CG7914	-3.22174	-2.020925	0.0014435968421514578	0.0027726608806237438
22762	ras_3	CG6231	-3.2227163	-21.213665	0.0012917721460792397	0.0025078310284124047
22766	ras_3	CG15213	-3.224022	-22.424915	0.0012859302134242022	0.0024975465089261332
22770	ras_3	Tsen34	-3.22669	-21.408445	0.0012740663990177719	0.002476076935180694
22771	ras_3	Mlh1	-3.226887	-2.1843736	0.0014143331110454975	0.002723867819866171
22772	ras_3	BHD	-3.2280705	-1.9760418	0.0014124637300838186	0.0027214100637377226
22774	ras_3	CG13247	-3.229352	-21.639065	0.0012623321703347577	0.0024553524831082045
22775	ras_3	CG6985	-3.2298663	-1.5673466	0.0014239379718599702	0.002738282973306341
22781	ras_3	CG13012	-3.2326326	-21.313995	0.0012480063624708392	0.0024300633225106004
22784	ras_3	Fam92	-3.234721	-21.684357	0.001238967036446397	0.0024139992693556363
22787	ras_3	RSG7	-3.2372293	-22.014713	0.0012281874001923944	0.0023960492019488022
22788	ras_3	Pif1A	-3.2379463	-21.347754	0.0012251235469917835	0.0023910888201764758
22789	ras_3	Pgant2	-3.239072	-22.39491	0.001220324845595555	0.0023832440311492586
22790	ras_3	svp	-3.2400405	-21.637884	0.0012162112721197643	0.002376221980770621
22791	ras_3	Ugt301D1	-3.2405396	-21.663246	0.0012140963159491221	0.002373242948869091
22795	ras_3	CG42450	-3.243538	-21.99099	0.0012014615332678693	0.0023514098907279654
22796	ras_3	Dlg5	-3.243657	-1.504525	0.0013574767819355368	0.002622625705255538
22801	ras_3	Nhe3	-3.2464473	-1.807654	0.001346418791770672	0.002603454671126642
22802	ras_3	Ntf-2r	-3.2470832	-21.768171	0.0011866784522817002	0.002324957249558958
22803	ras_3	CG17598	-3.247351	-1.5149409	0.001343795252379093	0.002599122169600775
22804	ras_3	Corin	-3.2494967	-21.43922	0.0011767118729433825	0.0023074014606231106
22805	ras_3	isopeptidase-T-3	-3.2502759	-21.632605	0.0011735108815931826	0.0023026010133912426
22806	ras_3	amn	-3.2519028	-21.850803	0.0011668518234430598	0.0022905146512815734
22809	ras_3	CG6325	-3.2533474	-1.9445099	0.0012950982878531607	0.002513224786601682
22810	ras_3	CG32281	-3.2545044	-1.5210799	0.0013166503361821558	0.002552502830812125
22812	ras_3	Adat1	-3.2561073	-2.242174	0.0012558362392622341	0.002444790472147464
22814	ras_3	Eh	-3.2573295	-22.121857	0.0011448956816075223	0.002251750885048021
22815	ras_3	ine	-3.2578247	-21.94184	0.0011429112038680645	0.002248329823218159
22818	ras_3	CG7156	-3.2588665	-1.8836695	0.0012816459553585098	0.0024897526234203527
22819	ras_3	CG10344	-3.2592008	-2.327615	0.0012100893598077326	0.00236728568789679
22822	ras_3	l(2)gd1	-3.2611513	-1.8266991	0.0012798439680797732	0.0024867785699135784
22824	ras_3	CG17681	-3.2638826	-21.457493	0.001118890246194421	0.002204857819766712
22825	ras_3	lz	-3.2639096	-22.168428	0.0011187838952620235	0.002204857819766712
22827	ras_3	CG4467	-3.2670627	-22.709934	0.0011064681612031353	0.0021844187354591884
22829	ras_3	rk	-3.2681458	-22.580517	0.0011022666395374232	0.0021767749500120224
22831	ras_3	Sp212	-3.2690518	-1.8569467	0.0012286429696866288	0.002396428411325429
22833	ras_3	acj6	-3.2692194	-22.011974	0.0010981169109963282	0.0021695139229955447
22837	ras_3	ATP8B	-3.2719848	-1.6767743	0.0012330573205973567	0.0024035056121692686
22838	ras_3	PIG-L	-3.2722912	-1.51435	0.0012311396133277796	0.0024002775079223072
22840	ras_3	Pat1	-3.2736666	-1.5695584	0.0012245367380655152	0.0023904520365427874
22841	ras_3	2mit	-3.2740629	-22.657808	0.0010795732412719255	0.002136226309182767
22844	ras_3	Ranbp21	-3.2762802	-1.8738954	0.001214078248430212	0.002373242948869091
22846	ras_3	CG42615	-3.2771115	-21.713688	0.0010680505467052504	0.0021155793968092988
22849	ras_3	wtrw	-3.2779183	-21.336193	0.0010650199067277438	0.002110487612144071
22851	ras_3	CG30283	-3.278493	-21.661438	0.0010628667075209025	0.0021066757488667704
22852	ras_3	CG2258	-3.2785225	-2.1906245	0.0012010378339141526	0.002351082169012663
22853	ras_3	sit	-3.2786405	-21.622519	0.0010623145202325814	0.0021060362409537456
22857	ras_3	CG9706	-3.2828174	-1.6581153	0.0011852850202549205	0.0023227232082099307
22861	ras_3	CG5509	-3.285251	-21.379688	0.0010378423705821366	0.002061083062790282
22862	ras_3	Ptth	-3.2855594	-21.591475	0.0010367132003065338	0.0020592863418082805
22863	ras_3	TfAP-2	-3.286196	-2.4127483	0.001084835894873664	0.0021451227016090232
22867	ras_3	Alg3	-3.289021	-1.5439723	0.0011629385183322062	0.002283349528964983
22870	ras_3	mus301	-3.2904575	-2.2585742	0.0011143123969052655	0.0021981974288552593
22871	ras_3	mira	-3.2904847	-22.410997	0.0010188375223750949	0.002024655461943144
22873	ras_3	ADD1	-3.291235	-1.6880267	0.001160667569893175	0.0022798383544786727
22874	ras_3	euc	-3.291509	-22.690481	0.001015156315393096	0.0020182143431704564
22875	ras_3	Pgant4	-3.292548	-22.27767	0.0010114343203913095	0.002011686514110181
22876	ras_3	RpI1	-3.2929752	-1.8307332	0.0011491371675529784	0.0022591243866077948
22879	ras_3	CG42360	-3.293463	-1.5203625	0.0011481479808238522	0.0022576634642217843
22882	ras_3	Rbp	-3.297119	-22.258953	0.0009952115428372116	0.0019815681218601166
22886	ras_3	Alh	-3.299825	-1.6326159	0.001119479340941839	0.0022055449759805397
22889	ras_3	Pldn	-3.3025897	-1.6293406	0.0011066134367754014	0.0021844187354591884
22891	ras_3	Osi9	-3.3029854	-22.852333	0.0009747424095459838	0.0019441873059966091
22892	ras_3	IntS6	-3.3036997	-1.834285	0.001107698943032524	0.002186091159888881
22895	ras_3	Sara	-3.3061752	-2.196829	0.0010943427394410564	0.0021629889345910584
22897	ras_3	unc	-3.3072035	-21.38287	0.0009602675421094281	0.0019186530267539207
22899	ras_3	CG34355	-3.3076804	-22.3206	0.0009586440367935238	0.0019158264076629453
22901	ras_3	Rca1	-3.3121316	-1.5866147	0.0010761732648158207	0.0021307487493925667
22902	ras_3	Chd1	-3.3122725	-1.6300021	0.001082580895905619	0.0021415868305161827
22908	ras_3	CG16710	-3.3145823	-22.693216	0.0009354236088481262	0.0018735017706137432
22909	ras_3	CG8785	-3.314617	-21.743858	0.0009353091071558036	0.0018735017706137432
22910	ras_3	CG9536	-3.3162277	-1.9203055	0.0010548819753888725	0.0020922053878497417
22911	ras_3	Cln7	-3.3168795	-2.279729	0.0010124745929172914	0.0020133191135709035
22912	ras_3	CG7518	-3.317675	-1.6310999	0.0010660211959277715	0.002112015649457418
22913	ras_3	CG9795	-3.31785	-2.208251	0.001051065306142193	0.0020850863100226207
22914	ras_3	Ag5r	-3.3194404	-21.98041	0.0009193939870336574	0.0018442150920493674
22915	ras_3	cn	-3.3203695	-21.671669	0.0009163575038880311	0.0018389282804402202
22916	ras_3	BomBc1	-3.3204882	-20.955608	0.0009159705725522916	0.0018385539276235562
22918	ras_3	Sur	-3.3218563	-21.606833	0.0009115181642071166	0.0018304178499891212
22923	ras_3	nAChRalpha3	-3.3281174	-21.972559	0.0008913955582684638	0.0017921005190201956
22924	ras_3	Srr	-3.3281286	-21.782745	0.0008913602585499622	0.0017921005190201956
22925	ras_3	CG31357	-3.3283112	-1.5950006	0.001018172164370353	0.0020237715788773807
22926	ras_3	CG2121	-3.3325624	-22.387554	0.0008773606626925858	0.0017656907392420431
22928	ras_3	CG42709	-3.3335798	-1.6436652	0.001001407194239824	0.001992607028226065
22930	ras_3	CG31674	-3.3347728	-22.357119	0.0008704582897047176	0.0017537230584191445
22933	ras_3	E23	-3.3367422	-2.4847374	0.0008988826747647326	0.0018062305170754318
22934	ras_3	jeb	-3.3382607	-22.487	0.000859668916912165	0.0017331272934891482
22936	ras_3	Dop2R	-3.340676	-21.750505	0.000852269989954331	0.0017197222691513058
22941	ras_3	CG14397	-3.3411963	-21.68373	0.0008506843200078441	0.0017172780277386072
22945	ras_3	CG3995	-3.3452218	-1.5126096	0.0009663312619759668	0.0019299280210338476
22946	ras_3	CG34347	-3.3453631	-21.90239	0.0008380813539242215	0.001693699652479016
22950	ras_3	Tdrd3	-3.3474276	-1.5113686	0.0009583375004083059	0.001915631060184359
22951	ras_3	CG4587	-3.347881	-22.015444	0.0008305495256319785	0.0016792181352299257
22952	ras_3	CG32354	-3.3488255	-22.327091	0.0008277407233763927	0.0016741369487043652
22955	ras_3	CG31816	-3.3502655	-22.02929	0.0008234748821219217	0.0016660158861011313
22956	ras_3	Etf-QO	-3.3504806	-1.6654005	0.0009418529014171279	0.0018851440598826677
22961	ras_3	CG32532	-3.3540213	-21.952677	0.0008124454584275095	0.00164515274356045
22964	ras_3	Sec5	-3.3563101	-1.6927911	0.0009173934279979568	0.001840604570715341
22966	ras_3	CG14314	-3.3563664	-2.254617	0.0009006317601317525	0.0018093488940680597
22970	ras_3	Scr	-3.3605285	-21.372477	0.0007936601436308734	0.0016099561834652363
22977	ras_3	CG15160	-3.3694973	-2.2300577	0.0008753087812942008	0.0017623344455506456
22978	ras_3	Cad74A	-3.369579	-1.9296527	0.0008768568344870983	0.0017650639439269694
22980	ras_3	CanB	-3.3722463	-22.455893	0.0007608455060637313	0.0015499017580228097
22981	ras_3	CPT2	-3.3730001	-1.9800028	0.0008643306027986461	0.0017417600001488202
22982	ras_3	CG14043	-3.3740687	-1.7312118	0.0008718142233483347	0.0017560692643734293
22984	ras_3	CG32170	-3.3744	-2.371521	0.0008092211095809774	0.0016389853599129067
22985	ras_3	Gr66a	-3.375746	-22.342	0.0007512923724871088	0.0015314613458274212
22986	ras_3	Cyp6a13	-3.375798	-22.037031	0.0007511513799697708	0.0015314613458274212
22987	ras_3	lab	-3.3761759	-21.899002	0.0007501266898358708	0.0015297649209255644
22988	ras_3	Amt	-3.376563	-22.206877	0.0007490782186307705	0.0015279663530318628
22989	ras_3	side-IV	-3.3768895	-21.682436	0.0007481953824440168	0.0015265049219310325
22991	ras_3	alpha-Man-Ic	-3.3770163	-21.73859	0.0007478526967132334	0.001526145127300693
22992	ras_3	Tsen2	-3.3777173	-1.7606107	0.0008510773541534614	0.0017176935161368255
22993	ras_3	CG7565	-3.3784363	-22.502062	0.0007440247201565047	0.001519347163907396
22994	ras_3	CG4020	-3.3785012	-21.981964	0.0007438504689544806	0.0015193294863440248
22996	ras_3	mwh	-3.3821769	-21.525051	0.0007340280869205771	0.0015016070674462197
23002	ras_3	sff	-3.3855734	-22.108662	0.0007250593053616381	0.001484914983636837
23003	ras_3	jus	-3.3855953	-21.833855	0.0007250014240864466	0.001484914983636837
23006	ras_3	Cyp6a22	-3.3886907	-2.3667724	0.0007714347634530705	0.001570426881447065
23008	ras_3	CG3253	-3.3913667	-21.750889	0.000709996254577049	0.0014560160115655843
23010	ras_3	Gcn2	-3.392271	-2.2863944	0.0007857139877234515	0.001595947916043176
23011	ras_3	tara	-3.3925486	-1.8731811	0.0008127949791160151	0.0016454973374645716
23012	ras_3	CG12605	-3.3929439	-22.555752	0.0007059460246980777	0.0014490055428646228
23015	ras_3	CG6024	-3.3963661	-22.159168	0.0006972320164887625	0.001433364049133855
23016	ras_3	CG4576	-3.396397	-1.5819181	0.0007919928448815261	0.001606929312646617
23017	ras_3	Ets98B	-3.3968446	-1.8963143	0.0007988463841175237	0.0016197603479068021
23019	ras_3	Fadd	-3.3990266	-1.5823715	0.0007986654122758175	0.0016197513611031444
23022	ras_3	peb	-3.4021401	-2.252883	0.0007759310310340469	0.0015781793858872489
23023	ras_3	CG8252	-3.4027383	-21.942173	0.0006812717415323119	0.0014023741771198252
23025	ras_3	CG9986	-3.4048927	-2.2431004	0.0007726111254090041	0.001572123991046266
23027	ras_3	CG5194	-3.406031	-21.867937	0.0006731590374903958	0.0013869827462327376
23028	ras_3	crq	-3.4063847	-1.6684068	0.00077614554512857	0.0015782658192718595
23031	ras_3	ZIPIC	-3.407042	-1.6892631	0.0007719311081733892	0.0015710887128418025
23032	ras_3	Syt7	-3.4074514	-22.421057	0.0006696867609878771	0.0013801383719819792
23034	ras_3	rho-5	-3.4088526	-21.862804	0.0006662778470277101	0.001373421533695628
23035	ras_3	loh	-3.4090633	-22.17086	0.0006657663103629901	0.0013726754826023449
23040	ras_3	atilla	-3.4119623	-2.35189	0.0007156636998655545	0.0014663274779514208
23041	ras_3	CG15382	-3.4128597	-22.33429	0.0006566184915322131	0.0013550325370688383
23045	ras_3	nAChRbeta2	-3.4185605	-21.99073	0.000643100842218898	0.0013292296074247328
23047	ras_3	Ent1	-3.4192562	-1.5338682	0.0007455104044859289	0.0015220422699506893
23048	ras_3	CG6602	-3.42137	-21.661623	0.0006365343220841096	0.001317140822084282
23049	ras_3	CG7432	-3.4222927	-2.2518468	0.0007268410896285849	0.0014882318672935209
23052	ras_3	poe	-3.4238176	-1.5210462	0.0007347698698410827	0.0015023017892847308
23054	ras_3	bdg	-3.4249258	-1.663586	0.0007328763850207815	0.0014995853774678121
23055	ras_3	CG32813	-3.424969	-22.865578	0.0006282145240842299	0.0013005117911716625
23062	ras_3	CheA29a	-3.4314227	-21.92417	0.0006135477450185306	0.0012730213841123967
23063	ras_3	CG34021	-3.4321592	-22.69493	0.0006118947064123884	0.0012698787449295778
23064	ras_3	GlcT	-3.4325871	-1.7733942	0.0006976676874960626	0.0014339384033997254
23068	ras_3	GstD7	-3.4362001	-22.577406	0.0006028968113908791	0.0012534734295289634
23069	ras_3	fat-spondin	-3.4363039	-21.7607	0.0006026678170123883	0.00125328132844258
23077	ras_3	CG17754	-3.4401586	-1.9619534	0.0006878483540457276	0.0014150243606209755
23078	ras_3	CG34431	-3.4415555	-22.175549	0.0005911625846016928	0.001232148276628926
23081	ras_3	CG32687	-3.4425883	-22.056664	0.0005889240766318764	0.001228319709728908
23082	ras_3	clos	-3.445115	-22.566347	0.0005834805345895134	0.0012180736984889159
23085	ras_3	Drip	-3.4481742	-22.47894	0.0005769534673930998	0.0012052705062230624
23087	ras_3	CG9044	-3.4485822	-2.2727375	0.0006557504362423553	0.0013535456136161102
23089	ras_3	CG2975	-3.4515078	-1.8823402	0.0006602982128364915	0.001362319789245516
23090	ras_3	Cpr64Aa	-3.4524646	-22.214777	0.0005679137999822609	0.001186926905429896
23092	ras_3	Doc2	-3.4553843	-21.697733	0.0005618380449481041	0.0011755676311057822
23095	ras_3	Oseg4	-3.4585063	-1.9179755	0.0006230979743829531	0.001291084894978228
23096	ras_3	CG30187	-3.4587264	-22.425055	0.0005549568953124017	0.001162229973634167
23102	ras_3	CG8176	-3.4607227	-1.6429548	0.000641587813249467	0.0013269991403435212
23103	ras_3	He	-3.4609559	-22.219446	0.0005504106187549898	0.0011535550486620689
23105	ras_3	CG32537	-3.4641628	-2.027728	0.0006274825894480733	0.00129958301539189
23106	ras_3	vrs	-3.4643378	-22.072195	0.0005435804038494324	0.0011397052571568882
23107	ras_3	mon2	-3.4645045	-2.2908046	0.0006149932593480055	0.0012754437510212365
23111	ras_3	CG2681	-3.467142	-22.046993	0.0005379772778776801	0.001129506069685976
23112	ras_3	Hexo2	-3.468357	-22.066778	0.0005355661183605769	0.001125216197837942
23115	ras_3	CG14995	-3.4742348	-1.5829921	0.0006149773593351846	0.0012754437510212365
23120	ras_3	alpha-Man-IIa	-3.4769833	-2.2709012	0.0006016879367560395	0.001251811070235071
23121	ras_3	Pdk	-3.477046	-1.6279188	0.0006039972818167837	0.0012551925392228743
23122	ras_3	CG1774	-3.4776862	-21.818935	0.0005173867875427572	0.0010900169404603438
23123	ras_3	klg	-3.4781554	-22.713757	0.0005164878443050535	0.001088381699845969
23127	ras_3	Ugalt	-3.4799905	-1.756098	0.0005992598331121869	0.0012481745672654517
23128	ras_3	IntS2	-3.480054	-2.2621481	0.0005952797631853328	0.0012401661733027769
23130	ras_3	Pld	-3.4811842	-1.7232718	0.0006009720346908062	0.0012508889333684543
23132	ras_3	ZC3H3	-3.4823859	-2.0280056	0.0005905079698617921	0.0012310635363512708
23138	ras_3	Trs33	-3.4865756	-1.6269201	0.0005858402712555247	0.0012224435953535225
23139	ras_3	CG2662	-3.4871254	-1.6904559	0.0005854123378876456	0.0012218285259597698
23140	ras_3	ato	-3.4879293	-22.485247	0.0004980896482547714	0.0010534745326734735
23143	ras_3	gammaSnap2	-3.4904842	-21.84697	0.0004933821743231114	0.0010439994117653476
23144	ras_3	bt	-3.4908202	-2.2990057	0.0005649778274330116	0.0011814973034825751
23145	ras_3	CG5948	-3.4926689	-22.258095	0.0004893903218388566	0.0010360305036620926
23146	ras_3	p	-3.4941394	-1.9850885	0.0005650583289026201	0.0011814973034825751
23148	ras_3	CG13082	-3.4957533	-22.220406	0.0004838049897824231	0.0010249159042377584
23150	ras_3	CG32971	-3.4980938	-22.506042	0.00047960662848582744	0.0010169611315824975
23156	ras_3	CG32829	-3.505853	-22.451925	0.00046593062963903756	0.0009900216597818828
23158	ras_3	CG42404	-3.5070605	-21.90907	0.00046383514814496624	0.0009862543416523906
23161	ras_3	Cyp6d5	-3.5089085	-1.5905846	0.0005358549466808575	0.0011255652783417737
23162	ras_3	Raf	-3.5092082	-2.3160088	0.0005198787319887197	0.0010947641418399135
23164	ras_3	PICK1	-3.5101724	-22.26327	0.00045847572309770245	0.0009755368180476391
23168	ras_3	RfC3	-3.51263	-1.9906353	0.0005320804166761639	0.0011186612793317608
23169	ras_3	Start1	-3.5126655	-1.9110864	0.0005282234085228044	0.0011113161598708394
23174	ras_3	CG31635	-3.5150027	-1.6353781	0.0005306077194687169	0.0011158207256762498
23176	ras_3	Try29F	-3.516237	-2.336237	0.0005026453695814286	0.0010621306462251514
23177	ras_3	CG12155	-3.5168123	-1.620547	0.0005299981705630562	0.0011147944096552133
23179	ras_3	Cpr78Cc	-3.520375	-22.889513	0.0004413075337188261	0.0009422845291762229
23181	ras_3	TAF1B	-3.521243	-1.7482995	0.0005194067319233943	0.0010940212960048538
23182	ras_3	kirre	-3.5219524	-1.5386373	0.0005126851176031349	0.0010818504954021994
23184	ras_3	Cpr65Aw	-3.5231273	-22.185705	0.000436779908583564	0.0009332686682007917
23186	ras_3	CG15916	-3.525503	-1.7007675	0.0005130401514398255	0.0010823507448747755
23187	ras_3	TAF1C-like	-3.525599	-2.282922	0.000504893055359638	0.0010666345344058665
23189	ras_3	Tep2	-3.5261183	-2.292699	0.0005004550635424091	0.001058233511869464
23194	ras_3	CG34288	-3.5310757	-21.872065	0.00042394763527569786	0.0009088129798258243
23198	ras_3	Teh2	-3.5332365	-22.092733	0.0004205204337948081	0.0009025204631736525
23199	ras_3	CG13937	-3.533884	-21.931458	0.00041949873144672196	0.000900538339032212
23201	ras_3	CG15024	-3.5364711	-21.803055	0.00041543856903572855	0.0008934948126823276
23202	ras_3	BubR1	-3.537645	-1.933429	0.00047685322845650725	0.0010115903748181396
23203	ras_3	Drep1	-3.5377245	-1.7773074	0.000488546980272162	0.001034483855065102
23206	ras_3	Obp57e	-3.538477	-21.336805	0.00041231624249796173	0.0008878201184977233
23207	ras_3	Slc45-1	-3.5390677	-23.394785	0.0004114006546444296	0.0008863748941794428
23208	ras_3	Nab2	-3.5431972	-1.718891	0.00047085446986085404	0.0009995580196606516
23211	ras_3	PGAP2	-3.5465586	-1.5893321	0.00047049407204943734	0.000999024094203561
23212	ras_3	sPLA2	-3.5468714	-22.321918	0.00039948502268611236	0.0008622147925535359
23214	ras_3	CG10041	-3.547507	-22.750471	0.0003985289860207689	0.000860556235994482
23218	ras_3	CG30114	-3.5515702	-21.662348	0.0003924670844771808	0.0008486649776285963
23220	ras_3	CG15864	-3.5517657	-22.384424	0.00039217742552729733	0.0008482385382397343
23221	ras_3	HemK1	-3.5530689	-1.7276884	0.0004579290701331585	0.000974599679534152
23225	ras_3	His2B:CG33868	-3.5562568	-21.835905	0.00038558188198153996	0.0008351543359727642
23226	ras_3	Cen	-3.557267	-2.2875414	0.00045205286323015797	0.0009627634679983053
23230	ras_3	trk	-3.5609858	-21.570704	0.0003787491071156902	0.0008219070619173268
23236	ras_3	CG16721	-3.564989	-2.043303	0.00043607829986928577	0.0009319865831122051
23238	ras_3	fd59A	-3.5651717	-22.217793	0.0003727959724015534	0.000809754509181878
23239	ras_3	htk	-3.5652988	-1.7386167	0.0004395170014003141	0.0009386798156070489
23240	ras_3	tbc	-3.5654275	-22.365572	0.00037243470207277225	0.000809161352478732
23241	ras_3	CysRS-m	-3.5659914	-1.7643623	0.0004426089204188049	0.0009448433794421906
23244	ras_3	ppk8	-3.5672426	-22.630196	0.0003698831476137264	0.000803998549954025
23245	ras_3	CG15646	-3.567419	-1.9829609	0.0004322787435830315	0.0009260232249297955
23249	ras_3	rhi	-3.568803	-22.067284	0.00036770218228652347	0.0007996367675939447
23251	ras_3	CG6749	-3.5709193	-1.7705207	0.00042192920772745853	0.0009046974715820126
23252	ras_3	CG34133	-3.57137	-2.0646474	0.00042550628145636963	0.0009117281953204557
23261	ras_3	CG2016	-3.575685	-22.77234	0.0003582273488282018	0.0007806973694771381
23262	ras_3	TTLL15	-3.5758252	-2.3167992	0.00041537526014679647	0.0008934948126823276
23263	ras_3	CG15515	-3.5758793	-22.812527	0.000357962989209663	0.0007803065873125821
23264	ras_3	pyx	-3.5769649	-21.087095	0.0003564905426010871	0.0007774471252746913
23266	ras_3	CG2321	-3.5777802	-21.191072	0.0003553883529469622	0.0007754311862754763
23267	ras_3	HPS4	-3.5784328	-22.162252	0.0003545084079863803	0.0007738792870033404
23269	ras_3	PCB	-3.5808618	-1.7697246	0.0003970533742286305	0.0008575717298841065
23273	ras_3	Mccc2	-3.5823333	-1.5227479	0.00041458557934794687	0.0008924971118060565
23274	ras_3	Ptpmeg	-3.582343	-1.762545	0.0004148765003793262	0.0008927044772467913
23280	ras_3	Marf1	-3.586194	-21.718777	0.0003441984559206002	0.0007526265093116079
23284	ras_3	retn	-3.5881057	-22.057398	0.0003417027932485183	0.0007478824255856765
23285	ras_3	CG5367	-3.5885952	-22.774952	0.00034106637857563715	0.0007466676266837201
23290	ras_3	RhoBTB	-3.5916057	-1.7439843	0.0004012255013584989	0.0008657676328702322
23293	ras_3	CG10011	-3.5948427	-2.3342223	0.0003846630567485223	0.000833557757597471
23296	ras_3	CG18259	-3.59744	-2.3039794	0.00038812007124880226	0.000839858880591453
23297	ras_3	LIMK1	-3.5975327	-1.9385394	0.0003932895351160376	0.000850042752577066
23302	ras_3	D19B	-3.601805	-1.9283179	0.0003874084474386549	0.0008385167504717289
23303	ras_3	CG3281	-3.6034553	-1.9926018	0.0003625642836411327	0.0007888373968241387
23305	ras_3	dsd	-3.6063733	-1.6511953	0.0003804273978407998	0.0008249743816718515
23308	ras_3	zfh1	-3.6088464	-22.471466	0.0003156900346161495	0.0006940944326870768
23309	ras_3	CG11807	-3.6091049	-1.6593443	0.0003778682135463958	0.0008203835445547047
23313	ras_3	wfs1	-3.6112833	-1.9407985	0.000371791071597745	0.0008079543064683349
23317	ras_3	CG44163	-3.6155422	-21.48753	0.00030769663109685716	0.0006773312356798619
23320	ras_3	Pi3K92E	-3.6200168	-1.9433497	0.0003608849318058235	0.0007859290883737076
23321	ras_3	jumu	-3.6201317	-2.0492315	0.0003565664853575914	0.0007774471252746913
23322	ras_3	CG14182	-3.6201966	-1.9413325	0.0003620399001034611	0.0007880702451836905
23326	ras_3	Vajk2	-3.6236923	-23.267876	0.0002982229950601494	0.0006582140918154609
23328	ras_3	CG4942	-3.6261044	-2.3485258	0.0003401392443240559	0.0007448156483706951
23329	ras_3	CG13154	-3.628004	-21.660788	0.0002933221670440946	0.0006483331444542442
23330	ras_3	Tsp42Ec	-3.6280665	-21.674385	0.0002932516922254591	0.0006483331444542442
23334	ras_3	CG7369	-3.6306057	-1.9844011	0.0003398701663503424	0.0007444041003257081
23335	ras_3	CG1434	-3.6309786	-2.3143334	0.00034447099174421983	0.0007530429709919507
23336	ras_3	CG34112	-3.631174	-2.3154051	0.0003439787852160673	0.0007523254718372867
23337	ras_3	Rdh	-3.6317506	-21.78298	0.00028912518999856554	0.0006393645741713277
23338	ras_3	CG32856	-3.6329184	-1.5724034	0.00034932490262551196	0.0007631085670450173
23340	ras_3	CG14321	-3.6353097	-22.87701	0.0002851905680396308	0.0006314245805414123
23343	ras_3	spz4	-3.6375113	-22.232407	0.0002827816328947201	0.0006265446708063407
23346	ras_3	CG4953	-3.6397161	-1.8182021	0.00033749027409741525	0.0007395446058857857
23348	ras_3	Mhc	-3.6405392	-22.603367	0.0002795001662068109	0.000619573332917973
23349	ras_3	wb	-3.6436431	-1.968954	0.00032216256496417806	0.0007069699912811131
23352	ras_3	CG10948	-3.64847	-2.3821108	0.0003085544430393034	0.0006788937685576999
23353	ras_3	FLASH	-3.6514754	-2.3313956	0.00031615207535576724	0.0006949437689001352
23354	ras_3	Cdep	-3.652005	-1.7723974	0.0003203902096044024	0.000703417126853408
23357	ras_3	disco-r	-3.656279	-2.0678575	0.00031099382264204446	0.0006839329632648029
23359	ras_3	CG13436	-3.6564093	-22.987066	0.0002628763141239681	0.0005861215509325412
23361	ras_3	ImpE1	-3.6579866	-2.3851347	0.00030089564463218316	0.0006631557865722509
23363	ras_3	CG13992	-3.658455	-21.928904	0.00026080210270478497	0.0005816381361974726
23364	ras_3	qvr	-3.6587892	-22.32011	0.00026046485491027025	0.0005810272413814076
23365	ras_3	Npc2b	-3.658941	-21.54715	0.0002603116716143875	0.0005810033860759134
23367	ras_3	mei-W68	-3.660708	-22.060616	0.00025853558125593494	0.0005778474928192943
23369	ras_3	Nelf-A	-3.661164	-1.7823014	0.0003095222407021525	0.0006808598797511986
23371	ras_3	Sep5	-3.6657307	-1.7402846	0.0003037692300410147	0.0006691675115549363
23372	ras_3	Bap170	-3.6664927	-2.3533878	0.00029626489808129083	0.000654207085414162
23373	ras_3	superdeath	-3.66793	-23.386404	0.0002513946312413656	0.0005628466914688945
23374	ras_3	Chpf	-3.6684413	-2.3327076	0.00030081672152646995	0.0006631557865722509
23375	ras_3	Osi2	-3.6700013	-22.527761	0.00024938081205211896	0.0005588834759594996
23377	ras_3	Cralbp	-3.6709192	-22.581676	0.00024849327089730624	0.0005570304814275067
23381	ras_3	CG5326	-3.672866	-1.955485	0.0002961863643145429	0.0006541911152108644
23383	ras_3	CG43737	-3.674132	-22.3624	0.0002454099586509048	0.0005514661696355747
23384	ras_3	CG42489	-3.6743548	-22.033152	0.0002451975970033214	0.0005511239472085923
23385	ras_3	CG42854	-3.6746583	-22.781569	0.0002449083684350936	0.000550608743051209
23388	ras_3	CG14130	-3.677055	-1.6750885	0.00028361816509588165	0.0006282464183376905
23391	ras_3	GluClalpha	-3.6785662	-22.1212	0.00024121362340565687	0.0005428341905192302
23393	ras_3	dyw	-3.6804187	-23.168665	0.0002394805604125356	0.0005394633296796008
23396	ras_3	beta4GalNAcTB	-3.6827385	-1.5284075	0.000287246011319501	0.0006355153493745893
23397	ras_3	bib	-3.6831675	-2.0043857	0.00028547173771535986	0.0006318946184652416
23398	ras_3	GABA-B-R1	-3.686468	-22.533854	0.0002339023464898599	0.0005274155883618738
23399	ras_3	CG4374	-3.6873708	-22.521055	0.00023308022441695815	0.0005259495964155414
23401	ras_3	CG4853	-3.6905074	-1.7021493	0.00027674521084103274	0.0006139113417472136
23404	ras_3	Cyp6u1	-3.6953266	-1.9942049	0.00027349084879797655	0.0006068388241164292
23406	ras_3	Nse4	-3.698368	-2.0216937	0.00026854880027054093	0.0005965146642646303
23408	ras_3	Cenp-C	-3.6996844	-2.3541806	0.00026360423552039	0.0005873163819571583
23409	ras_3	CG31778	-3.6997328	-22.241287	0.00022209447723985887	0.0005023956678194539
23413	ras_3	ec	-3.7026718	-1.534677	0.00026654461663355017	0.0005927161555048044
23414	ras_3	Cp18	-3.703743	-21.37466	0.00021863641883293564	0.0004951836936045876
23415	ras_3	PR-Set7	-3.7041054	-1.7640034	0.00026341661763544733	0.0005871835439274124
23416	ras_3	CG6144	-3.704472	-1.6008735	0.00026690109244269515	0.0005933650407467236
23417	ras_3	CG15861	-3.7055547	-1.9633816	0.0002635043980725527	0.0005872365441621741
23418	ras_3	wisp	-3.7058825	-22.13321	0.00021681235708003317	0.0004915377751937989
23422	ras_3	CG8569	-3.7082472	-1.7321041	0.00026036576391220154	0.0005810033860759134
23428	ras_3	Best1	-3.7121463	-1.6140366	0.00025986762700173314	0.0005805418742977603
23431	ras_3	Gale	-3.713456	-1.6435494	0.0002576136279493913	0.0005759271531275987
23433	ras_3	Fit2	-3.7148702	-1.9890139	0.000250006326683756	0.0005600117303035795
23436	ras_3	AlkB	-3.7163036	-1.8275927	0.0002499695823004976	0.0005600117303035795
23437	ras_3	CG1850	-3.7166798	-22.854763	0.00020782296413160726	0.00047267617647682117
23438	ras_3	CG11164	-3.718208	-2.060466	0.0002484496346682499	0.0005570304814275067
23439	ras_3	betaTub97EF	-3.718306	-2.0093172	0.00024832117022934155	0.0005569168264126641
23442	ras_3	CG11983	-3.7191026	-22.0506	0.0002058544797136138	0.0004690128759305703
23443	ras_3	Nse1	-3.7224748	-1.5559375	0.0002467123140684157	0.0005539856783107474
23444	ras_3	spas	-3.7233276	-2.0868886	0.00024177112874819272	0.0005438220412514508
23445	ras_3	CG11327	-3.7233882	-22.0762	0.00020241545524931682	0.00046186565578524793
23448	ras_3	sav	-3.7246742	-1.5579711	0.00024552580729800695	0.0005515914010673882
23453	ras_3	CG32681	-3.727318	-21.918816	0.0001993093583008474	0.00045545787357665626
23454	ras_3	CG13920	-3.728715	-22.64121	0.00019821615781581993	0.0004532984167398175
23459	ras_3	CG8248	-3.733617	-22.603476	0.00019442424130058103	0.00044495944473255946
23463	ras_3	CG15545	-3.7366507	-22.126562	0.00019211179317211465	0.0004402162093791588
23464	ras_3	D	-3.736754	-2.3833714	0.00022745940773709144	0.0005137715573579059
23465	ras_3	by	-3.736931	-1.5437073	0.00023642400988910803	0.0005329705874035789
23470	ras_3	janB	-3.7401156	-22.081976	0.0001895023671867765	0.0004348884989841607
23476	ras_3	Tsp29Fa	-3.749883	-21.860668	0.00018232480262986	0.0004197816973974819
23477	ras_3	PIG-O	-3.7505443	-2.0095162	0.00021280295758368414	0.0004830448134167001
23478	ras_3	Mcm3	-3.7517111	-1.8379242	0.0002219789233616839	0.0005022581064965351
23479	ras_3	CG2224	-3.7517898	-1.8491055	0.0002224479041419375	0.0005030711167124172
23480	ras_3	Galk	-3.7530296	-1.8847406	0.0002193730741705292	0.0004966069468331127
23482	ras_3	otk	-3.7539213	-1.7821473	0.000217425125031402	0.000492683507573009
23487	ras_3	Fbl6	-3.759319	-2.3890305	0.0002085685368734946	0.000474019401985215
23490	ras_3	tup	-3.7618635	-1.951716	0.00020712104326706175	0.00047154728833133787
23491	ras_3	CG9752	-3.7624927	-2.0428896	0.00020919124472601998	0.0004753169069740548
23496	ras_3	scny	-3.7656603	-1.545059	0.00021244883400437891	0.0004823603197204099
23498	ras_3	Nup154	-3.7678216	-1.8671448	0.00020852359225012425	0.000474019401985215
23502	ras_3	CG13604	-3.7712567	-2.4373407	0.0001923316347170802	0.000440499937226463
23503	ras_3	St2	-3.7722845	-22.983847	0.00016681749501596917	0.0003862097427316932
23514	ras_3	spdo	-3.7821913	-23.317396	0.00016036338835462183	0.00037201873278221376
23515	ras_3	CG8219	-3.7823732	-22.02477	0.00016024700960159878	0.0003718427701301641
23516	ras_3	Npc2f	-3.7823899	-22.832533	0.00016023634354605607	0.0003718427701301641
23517	ras_3	CG3862	-3.7834535	-1.6704961	0.00019963421762351415	0.0004560866401134816
23520	ras_3	gce	-3.784682	-22.612164	0.00015877801534182486	0.0003689939946203756
23525	ras_3	Damm	-3.788916	-23.234781	0.00015611702798866133	0.00036327003088916244
23527	ras_3	Prosbeta2R2	-3.7916787	-22.97367	0.0001544033714000227	0.00035955607426274317
23528	ras_3	shakB	-3.7917235	-22.799486	0.0001543757487531354	0.00035955607426274317
23529	ras_3	CG16863	-3.7920494	-22.235317	0.00015417480213506313	0.0003592973862304303
23530	ras_3	Syt4	-3.7920825	-22.82612	0.00015415441605592592	0.0003592973862304303
23532	ras_3	CG9272	-3.7932258	-1.675202	0.00019124105540411848	0.00043843995085776784
23533	ras_3	SecCl	-3.7936335	-22.221067	0.00015320165507358712	0.0003573017756228169
23535	ras_3	Tab2	-3.7942445	-1.8943994	0.00018509326201827567	0.0004255150786814531
23536	ras_3	PGRP-LF	-3.7944458	-22.11821	0.00015270480668100846	0.00035623356249637745
23540	ras_3	CG15449	-3.7965415	-2.3784676	0.0001839387029661154	0.00042307285026676084
23541	ras_3	CG3222	-3.797685	-22.186808	0.00015073894219762562	0.0003521848216611192
[truncated: 3,585 more rows]
